# Supplementary material for: PlantLTRdb: An interactive database for 195 plant species LTR-retrotransposons
Source: Front Plant Sci. 2023 Mar 6;14:1134627. doi: 10.3389/fpls.2023.1134627 (PMC10025401; doi:10.3389/fpls.2023.1134627)
Supplement: Supplementary file 5 [file Table_1.xlsx]

## Sheet: Table S1
Table S1: The species name, taxonomy ID, phylum, family, assembly level, Genome coverage, GenBank accession number, and genome size of all plant species
Phylum	Family	Species name	Genome coverage	Taxid	Assembly level	GenBank assembly accession	Genome size(Mb)
Streptophyta	Fabaceae	Abrus precatorius	140.0x	3816	Scaffold	GCA_003935025.1	347.23
Streptophyta	Sapindaceae	Acer yangbiense	100.0x	1000413	Chromosome	GCA_008009225.1	665.888
Streptophyta	Actinidiaceae	Actinidia rufa	270X	165716	Scaffold	GCA_014362265.1	647.239
Streptophyta	Poaceae	Aegilops tauschii subsp. strangulata	36.0x	200361	Chromosome	GCA_002575655.2	4218.18
Streptophyta	Amborellaceae	Amborella trichopoda	30x	13333	Scaffold	GCA_000471905.1	706.495
Streptophyta	Bromeliaceae	Ananas comosus	400.0x	4615	Chromosome	GCA_001540865.1	382.056
Streptophyta	Apiaceae	Apium graveolens	101.61x	4045	Chromosome	GCA_009905375.1	3332.58
Streptophyta	Orchidaceae	Apostasia shenzhenica	455.49x	1088818	Scaffold	GCA_002786265.1	348.733
Streptophyta	Ranunculaceae	Aquilegia coerulea	7.59x	218851	Scaffold	GCA_002738505.1	301.98
Streptophyta	Brassicaceae	Arabidopsis lyrata subsp. lyrata	8x	81972	Scaffold	GCA_000004255.1	206.823
Streptophyta	Brassicaceae	Arabidopsis thaliana		3702	Chromosome	GCA_000001735.2	119.669
Streptophyta	Fabaceae	Arachis duranensis	100.0x	130453	Chromosome	GCA_000817695.2	1084.26
Streptophyta	Fabaceae	Arachis ipaensis	100.0x	130454	Chromosome	GCA_000816755.2	1353.5
Streptophyta	Asparagaceae	Asparagus officinalis	123.0x	4686	Chromosome	GCA_001876935.1	1187.54
Chlorophyta	Astrephomenaceae	Astrephomene gubernaculifera	380x	47775	Contig	GCA_021605115.1	103.864
Streptophyta	Cucurbitaceae	Benincasa hispida	50.0x	102211	Chromosome	GCA_009727055.1	912.951
Streptophyta	Chenopodiaceae	Beta vulgaris subsp. vulgaris	30.0x	3555	Chromosome	GCA_000511025.2	566.55
Streptophyta	Poaceae	Brachypodium distachyon	9.43x	15368	Chromosome	GCA_000005505.4	271.299
Streptophyta	Brassicaceae	Brassica cretica	55x	69181	Scaffold	GCA_003260655.2	332.35
Streptophyta	Brassicaceae	Brassica napus	200x	3708	Chromosome	GCA_000686985.2	976.191
Streptophyta	Brassicaceae	Brassica oleracea var. oleracea	94.0x	109376	Chromosome	GCA_000695525.1	488.954
Streptophyta	Brassicaceae	Brassica rapa	57x	3711	Chromosome	GCA_000309985.3	352.983
Streptophyta	Scrophulariaceae	Buddleja alternifolia	100.0x	168488	Chromosome	GCA_019426215.1	853.755
Streptophyta	Fabaceae	Cajanus cajan	160x	3821	Chromosome	GCA_000340665.1	592.971
Streptophyta	Brassicaceae	Camelina sativa	100.0x	90675	Chromosome	GCA_000633955.1	641.356
Streptophyta	Theaceae	Camellia sinensis	300.0x	4442	Scaffold	GCA_004153795.1	3105.37
Streptophyta	Cannabaceae	Cannabis sativa	100x	3483	Chromosome	GCA_900626175.2	876.148
Streptophyta	Brassicaceae	Capsella rubella	22.35X	81985	Scaffold	GCA_000375325.1	133.064
Streptophyta	Solanaceae	Capsicum annuum	99X	4072	Chromosome	GCA_000710875.1	2935.88
Streptophyta	Solanaceae	Capsicum baccatum	136.1x	33114	Chromosome	GCA_002271885.2	3215.61
Streptophyta	Solanaceae	Capsicum chinense	132.2x	80379	Chromosome	GCA_002271895.2	3070.91
Streptophyta	Cyperaceae	Carex littledalei	121.95x	544730	Chromosome	GCA_011114355.1	373.853
Streptophyta	Caricaceae	Carica papaya		3649	Scaffold	GCA_000150535.1	370.419
Streptophyta	Betulaceae	Carpinus fangiana	200.0x	176857	Chromosome	GCA_006937295.1	381.949
Streptophyta	Juglandaceae	Carya illinoinensis	52.12x	32201	Chromosome	GCA_018687715.1	674.433
Streptophyta	Cephalotaceae	Cephalotus follicularis	150X	3775	Scaffold	GCA_001972305.1	1614.52
Streptophyta	Ditrichaceae	Ceratodon purpureus	140.6x	3225	Chromosome	GCA_014871385.1	362.511
Streptophyta	Characeae	Chara braunii	50x	69332	Scaffold	GCA_003427395.1	1751.21
Streptophyta	Chenopodiaceae	Chenopodium quinoa	60.0x	63459	Scaffold	GCA_001683475.1	1333.55
Chlorophyta	Chlamydomonadaceae	Chlamydomonas eustigma	20x	1157962	Scaffold	GCA_002335675.1	66.6295
Chlorophyta	Chlamydomonadaceae	Chlamydomonas reinhardtii		3055	Scaffold	GCA_000002595.2	111.098
Chlorophyta	Chlorellaceae	Chlorella variabilis	8.9x	554065	Scaffold	GCA_000147415.1	46.1595
Chlorophyta	Chloropicaceae	Chloropicon primus	391.0x	1764295	Chromosome	GCA_007859695.1	17.4007
Rhodophyta	Gigartinaceae	Chondrus crispus		2769	Scaffold	GCA_000350225.2	104.98
Streptophyta	Fabaceae	Cicer arietinum	120x	3827	Chromosome	GCA_000331145.1	530.894
Streptophyta	Lauraceae	Cinnamomum micranthum f. kanehirae	85.0x	337451	Scaffold	GCA_003546025.1	730.416
Streptophyta	Rutaceae	Citrus clementina	6.96x	85681	Scaffold	GCA_000493195.1	301.365
Streptophyta	Rutaceae	Citrus sinensis	214.0x	2711	Chromosome	GCA_000317415.1	327.83
Streptophyta	Rutaceae	Citrus unshiu	144x	55188	Scaffold	GCA_002897195.1	359.652
Chlorophyta	Coccomyxaceae	Coccomyxa subellipsoidea C-169	8.16x + targeted finishing	574566	Contig	GCA_000258705.1	48.8266
Streptophyta	Rubiaceae	Coffea arabica	160.0x	13443	Chromosome	GCA_003713225.1	1094.45
Streptophyta	Rubiaceae	Coffea canephora	24x	49390	Chromosome	GCA_900059795.1	568.612
Streptophyta	Rubiaceae	Coffea eugenioides	160.0x	49369	Chromosome	GCA_003713205.1	699.904
Streptophyta	Malvaceae	Corchorus capsularis	25.0x	210143	Scaffold	GCA_001974805.1	317.178
Streptophyta	Malvaceae	Corchorus olitorius	29.0x	93759	Contig	GCA_001974825.1	334.912
Streptophyta	Myrtaceae	Corymbia citriodora subsp. variegata	405x	360336	Chromosome	GCA_014858505.1	544.192
Streptophyta	Cucurbitaceae	Cucumis melo		3656	Scaffold	GCA_000313045.1	374.928
Streptophyta	Cucurbitaceae	Cucumis sativus	50.0x	3659	Chromosome	GCA_000004075.3	226.641
Streptophyta	Cucurbitaceae	Cucurbita maxima	282.7x	3661	Scaffold	GCA_002738345.1	271.413
Streptophyta	Cucurbitaceae	Cucurbita moschata	215.5x	3662	Scaffold	GCA_002738365.1	269.943
Streptophyta	Cucurbitaceae	Cucurbita pepo subsp. pepo	198.0x	3664	Chromosome	GCA_002806865.2	261.355
Streptophyta	Convolvulaceae	Cuscuta australis	97.6x	267555	Contig	GCA_003260385.1	262.63
Streptophyta	Convolvulaceae	Cuscuta campestris	60x	132261	Scaffold	GCA_900332095.2	476.795
Rhodophyta	Cyanidiaceae	Cyanidioschyzon merolae		280699	Chromosome	GCA_000091205.1	16.4
Streptophyta	Asteraceae	Cynara cardunculus var. scolymus		59895	Chromosome	GCA_001531365.1	725.198
Streptophyta	Apiaceae	Daucus carota subsp. sativus	186.0x	79200	Chromosome	GCA_001625215.1	421.539
Streptophyta	Orchidaceae	Dendrobium catenatum	202.0x	906689	Scaffold	GCA_001605985.2	1104.26
Streptophyta	Poaceae	Dichanthelium oligosanthes	234.0x	888268	Scaffold	GCA_001633215.2	589.166
Streptophyta	Dioscoreaceae	Dioscorea cayenensis subsp. rotundata	34x	55577	Chromosome	GCA_009730915.2	584.309
Streptophyta	Gesneriaceae	Dorcoceras hygrometricum	287.0x	472368	Scaffold	GCA_001598015.1	1521.36
Chlorophyta	Dunaliellaceae	Dunaliella salina	89.6x	3046	Scaffold	GCA_002284615.2	343.704
Streptophyta	Malvaceae	Durio zibethinus	153.0x	66656	Scaffold	GCA_002303985.1	715.23
Streptophyta	Arecaceae	Elaeis guineensis	16.0x	51953	Chromosome	GCA_000442705.1	1535.18
Streptophyta	Poaceae	Eleusine coracana subsp. coracana	1260x	191504	Scaffold	GCA_021604985.1	1229.37
Streptophyta	Musaceae	Ensete ventricosum	45.0x	4639	Scaffold	GCA_000818735.3	451.279
Streptophyta	Poaceae	Eragrostis curvula	90.0x	38414	Chromosome	GCA_007726485.1	603.072
Streptophyta	Asteraceae	Erigeron canadensis	248.0x	72917	Chromosome	GCA_010389155.1	426.383
Streptophyta	Phrymaceae	Erythranthe guttata	6.43x	4155	Scaffold	GCA_000504015.1	322.167
Streptophyta	Myrtaceae	Eucalyptus grandis	25x	71139	Chromosome	GCA_016545825.1	616.53
Streptophyta	Brassicaceae	Eutrema salsugineum	7.78X	72664	Scaffold	GCA_000478725.1	243.11
Streptophyta	Rosaceae	Fragaria vesca subsp. vesca	49x	101020	Chromosome	GCA_000184155.1	214.373
Rhodophyta	Cyanidiaceae	Galdieria sulphuraria		130081	Scaffold	GCA_000341285.1	14.3
Streptophyta	Lentibulariaceae	Genlisea aurea	300.0x	192259	Scaffold	GCA_000441915.1	43.3
Streptophyta	Fabaceae	Glycine max	8.05x	3847	Chromosome	GCA_000004515.4	978.942
Streptophyta	Fabaceae	Glycine soja	77.0x	3848	Chromosome	GCA_004193775.2	1013.77
Chlorophyta	Volvocaceae	Gonium pectorale	50.0x	33097	Scaffold	GCA_001584585.1	148.806
Streptophyta	Malvaceae	Gossypium arboreum	110x	29729	Chromosome	GCA_000612285.2	1694.6
Streptophyta	Malvaceae	Gossypium australe	70.0x	47621	Chromosome	GCA_005393395.2	1743.39
Streptophyta	Malvaceae	Gossypium darwinii	80.57x	34276	Chromosome	GCA_007990325.1	2182.96
Streptophyta	Malvaceae	Gossypium hirsutum	200x	3635	Chromosome	GCA_000987745.1	2189.14
Streptophyta	Malvaceae	Gossypium raimondii	19.7x	29730	Chromosome	GCA_000327365.1	761.565
Streptophyta	Bignoniaceae	Handroanthus impetiginosus	91.0x	429701	Scaffold	GCA_002762385.1	503.289
Streptophyta	Malvaceae	Herrania umbratica	223.0x	108875	Scaffold	GCA_002168275.2	234.039
Streptophyta	Euphorbiaceae	Hevea brasiliensis	99.0x	3981	Scaffold	GCA_001654055.1	1373.53
Streptophyta	Malvaceae	Hibiscus syriacus	74.0x	106335	Scaffold	GCA_006381635.2	1826.93
Streptophyta	Poaceae	Hordeum vulgare subsp. vulgare	25x	112509	Chromosome	GCA_904849725.1	4225.71
Streptophyta	Convolvulaceae	Ipomoea nil	1231x	35883	Scaffold	GCA_001879475.1	735.231
Streptophyta	Convolvulaceae	Ipomoea triloba	290.0x	35885	Chromosome	GCA_003576645.1	461.989
Streptophyta	Euphorbiaceae	Jatropha curcas	190.0x	180498	Scaffold	GCA_014843425.1	266.964
Streptophyta	Juglandaceae	Juglans microcarpa x Juglans regia	47x	2249226	Chromosome	GCA_004785595.1	527.896
Streptophyta	Juglandaceae	Juglans regia	155.0x	51240	Chromosome	GCA_001411555.2	572.947
Streptophyta	Klebsormidiaceae	Klebsormidium nitens	90.0x	105231	Scaffold	GCA_000708835.1	104.21
Streptophyta	Asteraceae	Lactuca saligna	2553x	75948	Chromosome	GCA_902860255.1	2165.76
Streptophyta	Asteraceae	Lactuca sativa	72.0x	4236	Chromosome	GCA_002870075.2	2391.58
Streptophyta	Fabaceae	Lupinus angustifolius	245.0x	3871	Chromosome	GCA_001865875.1	609.203
Streptophyta	Proteaceae	Macadamia integrifolia	133.6x	60698	Chromosome	GCA_013358625.1	744.937
Streptophyta	Papaveraceae	Macleaya cordata	503.0x	56857	Scaffold	GCA_002174775.1	377.834
Streptophyta	Rosaceae	Malus baccata	248.0x	106549	Scaffold	GCA_006547085.1	674.412
Streptophyta	Rosaceae	Malus domestica	700.0x	3750	Chromosome	GCA_002114115.1	703.358
Streptophyta	Anacardiaceae	Mangifera indica	240.0x	29780	Chromosome	GCA_011075055.1	391.962
Streptophyta	Euphorbiaceae	Manihot esculenta	121x	3983	Chromosome	GCA_001659605.1	640.431
Streptophyta	Marchantiaceae	Marchantia paleacea	64x	56867	Contig	GCA_014180765.2	250.804
Streptophyta	Marchantiaceae	Marchantia polymorpha	26.74x	3197	Scaffold	GCA_003032435.1	225.761
Streptophyta	Fabaceae	Medicago truncatula	109.0x	3880	Chromosome	GCA_003473485.2	430.008
Chlorophyta	Chlorellaceae	Micractinium conductrix	57.0x	554055	Contig	GCA_002245815.2	61.0189
Chlorophyta	Mamiellaceae	Micromonas commoda		296587	Chromosome	GCA_000090985.2	21.1
Streptophyta	Asteraceae	Mikania micrantha	134.0x	192012	Chromosome	GCA_009363875.1	1790.64
Streptophyta	Cucurbitaceae	Momordica charantia	110x	3673	Scaffold	GCA_001995035.1	285.614
Chlorophyta	Selenastraceae	Monoraphidium neglectum	49.3x	145388	Scaffold	GCA_000611645.1	69.7
Streptophyta	Myricaceae	Morella rubra	293.0x	262757	Chromosome	GCA_003952965.2	313.009
Streptophyta	Moraceae	Morus notabilis	236x	981085	Scaffold	GCA_000414095.2	320.379
Streptophyta	Fabaceae	Mucuna pruriens	2.0x	157652	Scaffold	GCA_003370565.1	397.042
Streptophyta	Musaceae	Musa acuminata subsp. malaccensis		214687	Chromosome	GCA_000313855.2	472.231
Streptophyta	Musaceae	Musa balbisiana	113.0x	52838	Chromosome	GCA_004837865.1	492.775
Streptophyta	Nelumbonaceae	Nelumbo nucifera	100.0x	4432	Scaffold	GCA_000365185.2	804.648
Streptophyta	Solanaceae	Nicotiana attenuata	30.0x	49451	Chromosome	GCA_001879085.1	2365.68
Streptophyta	Solanaceae	Nicotiana sylvestris	94.0x	4096	Scaffold	GCA_000393655.1	2221.99
Streptophyta	Solanaceae	Nicotiana tabacum	49.0x	4097	Scaffold	GCA_000715135.1	3643.47
Streptophyta	Solanaceae	Nicotiana tomentosiformis	146.0x	4098	Scaffold	GCA_000390325.2	1688.47
Streptophyta	Nymphaeaceae	Nymphaea colorata	124.0x	210225	Chromosome	GCA_008831285.1	409.014
Streptophyta	Nyssaceae	Nyssa sinensis	99.12x	561372	Chromosome	GCA_008638375.1	1001.45
Streptophyta	Oleaceae	Olea europaea var. sylvestris	220.0x	158386	Chromosome	GCA_002742605.1	1141.15
Streptophyta	Poaceae	Oryza brachyantha	104x	4533	Chromosome	GCA_000231095.2	263.33
Streptophyta	Poaceae	Oryza sativa Japonica Group		39947	Chromosome	GCA_001433935.1	374.423
Chlorophyta	Bathycoccaceae	Ostreococcus lucimarinus CCE9901		436017	Complete Genome	GCA_000092065.1	13.2049
Chlorophyta	Bathycoccaceae	Ostreococcus tauri		70448	Chromosome	GCA_000214015.2	13.0328
Streptophyta	Poaceae	Panicum hallii	202x	206008	Chromosome	GCA_002211085.2	535.889
Streptophyta	Poaceae	Panicum virgatum	121.66x	38727	Chromosome	GCA_016808335.1	1130
Streptophyta	Papaveraceae	Papaver somniferum	239.0x	3469	Chromosome	GCA_003573695.1	2715.53
Streptophyta	Cannabaceae	Parasponia andersonii	100.0x	3476	Scaffold	GCA_002914805.1	475.834
Streptophyta	Lamiaceae	Perilla frutescens var. frutescens	54.5x	151328	Scaffold	GCA_019511825.2	1234.37
Streptophyta	Orchidaceae	Phalaenopsis equestris	99.5x	78828	Scaffold	GCA_001263595.1	1064.2
Streptophyta	Fabaceae	Phaseolus vulgaris	21.02X	3885	Chromosome	GCA_000499845.1	521.077
Streptophyta	Arecaceae	Phoenix dactylifera	100x	42345	Chromosome	GCA_009389715.1	773.189
Streptophyta	Orobanchaceae	Phtheirospermum japonicum	83x	374723	Scaffold	GCA_014905375.1	1226.89
Streptophyta	Funariaceae	Physcomitrella patens	18.49x	3218	Chromosome	GCA_000002425.2	472.081
Streptophyta	Anacardiaceae	Pistacia vera	374x	55513	Scaffold	GCA_008641045.1	671.28
Streptophyta	Salicaceae	Populus alba	130.17x	43335	Contig	GCA_005239225.1	416.986
Streptophyta	Salicaceae	Populus euphratica	115x (4.4x fosmid+111x WGS)	75702	Scaffold	GCA_000495115.1	496.033
Streptophyta	Salicaceae	Populus trichocarpa	8x	3694	Chromosome	GCA_000002775.3	434.29
Streptophyta	Fabaceae	Prosopis alba	30.0x	207710	Contig	GCA_004799145.1	707.162
Streptophyta	Rosaceae	Prunus avium	327x	42229	Scaffold	GCA_002207925.1	272.362
Streptophyta	Rosaceae	Prunus dulcis	800x	3755	Chromosome	GCA_902201215.1	227.757
Streptophyta	Rosaceae	Prunus mume	180x	102107	Chromosome	GCA_000346735.1	234.03
Streptophyta	Rosaceae	Prunus persica	8.47x	3760	Chromosome	GCA_000346465.2	227.569
Streptophyta	Lythraceae	Punica granatum	60.0x	22663	Chromosome	GCA_007655135.2	320.494
Chlorophyta	Pycnococcaceae	Pycnococcus provasolii	496x	41880	Contig	GCA_015473125.1	22.7009
Streptophyta	Rosaceae	Pyrus ussuriensis x Pyrus communis	123.0x	2448454	Chromosome	GCA_008932095.1	510.637
Streptophyta	Rosaceae	Pyrus x bretschneideri	7.6x BAC; the average coverage depth of each BAC is 86x; additional 107.6x WGS	225117	Scaffold	GCA_000315295.1	508.551
Streptophyta	Fagaceae	Quercus lobata	280.0x	97700	Chromosome	GCA_001633185.5	845.947
Streptophyta	Fagaceae	Quercus suber	737.72x	58331	Scaffold	GCA_002906115.1	953.299
Streptophyta	Brassicaceae	Raphanus sativus	267.0x	3726	Scaffold	GCA_000801105.2	426.614
Chlorophyta	Selenastraceae	Raphidocelis subcapitata	80x	307507	Scaffold	GCA_003203535.1	51.1627
Streptophyta	Rhamnaceae	Rhamnella rubrinervis	69.3x	2594499	Chromosome	GCA_007844105.2	245.348
Streptophyta	Ericaceae	Rhododendron simsii	100.0x	118357	Chromosome	GCA_014282245.1	528.637
Streptophyta	Ericaceae	Rhododendron williamsianum	382.0x	262921	Chromosome	GCA_009746105.1	532.293
Streptophyta	Euphorbiaceae	Ricinus communis	4.5x	3988	Scaffold	GCA_000151685.2	350.622
Streptophyta	Rosaceae	Rosa chinensis	80.0x	74649	Chromosome	GCA_002994745.2	515.119
Streptophyta	Salicaceae	Salix brachista	75.0x	2182728	Chromosome	GCA_009078335.1	339.588
Streptophyta	Lamiaceae	Salvia splendens	100.0x	180675	Chromosome	GCA_004379255.2	806.486
Streptophyta	Selaginellaceae	Selaginella moellendorffii	7.0x	88036	Scaffold	GCA_000143415.2	212.315
Streptophyta	Pedaliaceae	Sesamum indicum	152.7x	4182	Chromosome	GCA_000512975.1	275.059
Streptophyta	Poaceae	Setaria italica	6.96x	4555	Chromosome	GCA_000263155.2	405.868
Streptophyta	Poaceae	Setaria viridis	118x	4556	Chromosome	GCA_005286985.1	395.87
Streptophyta	Brassicaceae	Sinapis alba	100x	3728	Scaffold	GCA_012274485.2	449.668
Streptophyta	Solanaceae	Solanum chilense	122.0x	4083	Scaffold	GCA_006013705.1	913.881
Streptophyta	Solanaceae	Solanum lycopersicum	27.0x	4081	Chromosome	GCA_000188115.3	828.349
Streptophyta	Solanaceae	Solanum pennellii	210x	28526	Chromosome	GCA_001406875.2	926.426
Streptophyta	Solanaceae	Solanum tuberosum	114X	4113	Scaffold	GCA_000226075.1	705.934
Streptophyta	Poaceae	Sorghum bicolor	8x	4558	Chromosome	GCA_000003195.3	709.345
Streptophyta	Fabaceae	Spatholobus suberectus		455371	Chromosome	GCA_004329165.1	798.47
Streptophyta	Chenopodiaceae	Spinacia oleracea	168.0x	3562	Scaffold	GCA_002007265.1	869.946
Streptophyta	Orobanchaceae	Striga asiatica	143x	4170	Scaffold	GCA_008636005.1	471.563
Streptophyta	Cleomaceae	Tarenaya hassleriana	139x	28532	Scaffold	GCA_000463585.1	249.93
Streptophyta	Proteaceae	Telopea speciosissima	193.0x	54955	Chromosome	GCA_018873765.1	823.061
Chlorophyta	Tetrabaenaceae	Tetrabaena socialis	300.0x	47790	Scaffold	GCA_002891735.1	135.78
Streptophyta	Malvaceae	Theobroma cacao		3641	Chromosome	GCA_000208745.2	324.88
Streptophyta	Cannabaceae	Trema orientale	100.0x	63057	Scaffold	GCA_002914845.1	387.958
Streptophyta	Fabaceae	Trifolium pratense	55.0x	57577	Chromosome	GCA_020283565.1	414.027
Streptophyta	Fabaceae	Trifolium subterraneum	552.8x	3900	Scaffold	GCA_001742945.1	471.834
Streptophyta	Celastraceae	Tripterygium wilfordii	793.34x	458696	Chromosome	GCA_013401445.1	348.533
Streptophyta	Fabaceae	Vigna angularis	167.67x	3914	Chromosome	GCA_001190045.1	467.301
Streptophyta	Fabaceae	Vigna radiata var. radiata	300.0x	3916	Chromosome	GCA_000741045.2	463.638
Streptophyta	Fabaceae	Vigna unguiculata	91.0x	3917	Chromosome	GCA_004118075.1	519.067
Streptophyta	Vitaceae	Vitis vinifera		29760	Chromosome	GCA_000003745.2	486.197
Chlorophyta	Volvocaceae	Volvox africanus	294x	51714	Contig	GCA_019650175.1	129.328
Chlorophyta	Volvocaceae	Volvox carteri f. nagariensis	8x	3068	Scaffold	GCA_000143455.1	137.684
Streptophyta	Poaceae	Zea mays	83x	4577	Chromosome	GCA_902167145.1	2182.79
Streptophyta	Zingiberaceae	Zingiber officinale	100.0x	94328	Chromosome	GCA_018446385.1	3090.43
Streptophyta	Rhamnaceae	Ziziphus jujuba	255.52x	326968	Chromosome	GCA_000826755.1	437.754
Streptophyta	Zosteraceae	Zostera marina	47.7x	29655	Scaffold	GCA_001185155.1	203.914
