# Supplementary material for: PlantLTRdb: An interactive database for 195 plant species LTR-retrotransposons
Source: Front Plant Sci. 2023 Mar 6;14:1134627. doi: 10.3389/fpls.2023.1134627 (PMC10025401; doi:10.3389/fpls.2023.1134627)
Supplement: Supplementary file 6 [file Table_2.xlsx]

## Sheet: Sheet1
Table S2: The lineages and their corresponding totals in the database for Copia and Gypsy elements
Copia		Gypsy
lineages	Total number	lineages	Total number
Ale	59115	Tekay	69903
SIRE	51912	Retand	59621
Angela	46850	Athila	47269
Ivana	22331	CRM	23475
Tork	25409	Reina	16767
Bianca	11734	Ogre	10814
Ikeros	9060	Galadriel	3825
TAR	8966	Tcn1	2176
Alesia	1427	Chlamyvir	348
Bryco	157	Phygy	320
Osser	99	Selgy	170
Lyco	29	TatI	11
Gymco-II	12	TatII	2
Gymco-III	4	TatIII	3
Gymco-IV	3
Gymco-I	3
