# Supplementary material for: PlantLTRdb: An interactive database for 195 plant species LTR-retrotransposons
Source: Front Plant Sci. 2023 Mar 6;14:1134627. doi: 10.3389/fpls.2023.1134627 (PMC10025401; doi:10.3389/fpls.2023.1134627)
Supplement: Supplementary file 7 [file Table_3.xlsx]

## Sheet: Sheet1
Table S3: Total number of identified autonomous and nonautonomous LTR-RTs for the 195 plant species
Species name	Autonomous		Nonautonomous
	Gypsy	Copia	Gypsy	Copia	BARE-2	TR-GAG	Unknown
Abrus precatorius	20	11	352	264	1	1	4
Acer yangbiense	67	178	1305	2957	45	10	467
Actinidia rufa	7	92	651	800	12	11	69
Aegilops tauschii	391	628	17405	9248	77	96	5400
Amborella trichopoda	-	3	13	26	1	1	-
Ananas comosus	3	8	240	217	2	-	6
Apium graveolens	413	1423	14754	15834	24	84	669
Apostasia shenzhenica	2	-	92	30	-	-	-
Aquilegia coerulea	47	27	971	984	10	2	446
Arabidopsis lyrata	19	52	576	537	-	6	15
Arabidopsis thaliana	-	4	59	100	-	1	1
Arachis duranensis	75	28	1038	298	3	-	169
Arachis ipaensis	138	56	2232	495	18	4	619
Asparagus officinalis	12	211	918	2439	11	16	120
Astrephomene gubernaculifera	7	-	10	11	-	-	4
Benincasa hispida	11	78	295	423	29	3	24
Beta vulgaris	15	75	609	913	4	5	13
Brachypodium distachyon	7	19	206	185	-	-	4
Brassica cretica	4	20	106	286	1	1	12
Brassica napus	38	263	638	1628	11	14	34
Brassica oleracea	12	53	250	504	1	4	10
Brassica rapa	49	148	710	901	34	11	101
Buddleja alternifolia	113	111	2023	3386	11	18	578
Cajanus cajan	11	12	557	325	2	2	11
Camelina sativa	17	101	393	798	1	6	10
Camellia sinensis	204	221	2388	1307	26	43	213
Cannabis sativa	16	62	1726	2524	2	10	2036
Capsella rubella	4	44	56	95	1	-	-
Capsicum annuum	114	186	1107	1018	18	15	128
Capsicum baccatum	51	194	2870	1284	12	16	203
Capsicum chinense	26	99	1241	1265	16	18	177
Carex littledalei	11	79	514	992	2	-	50
Carica papaya	-	5	19	43	-	-	-
Carpinus fangiana	6	18	311	259	1	3	57
Carya illinoinensis	23	42	1259	2269	4	23	208
Cephalotus follicularis	344	121	3785	1636	18	53	175
Ceratodon purpureus	10	9	459	169	-	1	2
Chara braunii	-	-	18	-	-	-	5
Chenopodium quinoa	285	121	6875	1758	19	11	566
Chlamydomonas eustigma	2	-	7	4	-	-	-
Chlamydomonas reinhardtii	-	-	5	10	-	-	1
Chlorella variabilis	-	-	2	-	-	-	-
Chondrus crispus	-	-	1	61	-	1	6
Cicer arietinum	1	16	67	419	4	-	76
Cinnamomum micranthum	20	149	987	1161	3	14	91
Citrus clementina	20	62	514	593	4	7	8
Citrus sinensis	8	25	104	234	1	5	-
Citrus unshiu	3	22	129	267	-	3	1
Coccomyxa subellipsoidea	-	-	4	-	-	-	-
Coffea arabica	172	91	2883	1587	9	95	388
Coffea canephora	32	8	484	408	2	2	17
Coffea eugenioides	178	146	1517	772	38	74	226
Corchorus capsularis	8	-	417	423	-	-	16
Corchorus olitorius	-	12	441	376	3	2	25
Corymbia citriodora	21	64	132	581	1	-	14
Cucumis melo	4	4	132	80	3	-	-
Cucumis sativus	5	23	150	115	2	-	19
Cucurbita maxima	2	45	36	204	3	-	54
Cucurbita moschata	31	43	55	247	5	1	69
Cucurbita pepo	20	24	18	147	-	2	25
Cuscuta australis	19	104	509	1133	19	26	73
Cuscuta campestris	18	60	253	523	18	20	115
Cynara cardunculus	10	27	126	373	3	-	20
Daucus carota	18	55	284	441	2	6	7
Dendrobium catenatum	17	48	300	743	3	3	7
Dichanthelium oligosanthes	4	4	65	67	-	-	-
Dioscorea cayenensis	17	33	472	871	2	2	87
Dorcoceras hygrometricum	25	10	625	300	-	1	23
Dunaliella salina	-	-	17	9	-	-	2
Durio zibethinus	6	43	112	380	3	5	23
Elaeis guineensis	4	24	27	66	2	-	-
Eleusine coracana	27	55	2749	1195	1	5	121
Ensete ventricosum	2	1	73	14	-	-	2
Eragrostis curvula	40	49	1724	1197	8	7	214
Erigeron canadensis	25	176	354	1087	3	23	175
Erythranthe guttata	32	31	464	660	4	8	187
Eucalyptus grandis	14	37	294	2204	6	9	53
Eutrema salsugineum	78	22	801	567	1	1	22
Fragaria vesca	2	-	75	202	1	-	11
Glycine max	100	65	1550	1528	7	11	78
Glycine soja	118	70	1843	1812	5	6	104
Gonium pectorale	-	-	-	3	-	-	-
Gossypium arboreum	84	63	1694	969	11	4	128
Gossypium australe	202	87	9295	1951	5	61	1112
Gossypium darwinii	335	780	5989	2916	46	58	333
Gossypium hirsutum	98	226	2047	2526	16	24	104
Gossypium raimondii	15	47	521	836	5	11	10
Handroanthus impetiginosus	22	42	232	256	4	4	-
Herrania umbratica	1	1	5	17	-	-	6
Hevea brasiliensis	44	295	735	494	9	8	37
Hibiscus syriacus	323	814	3124	4112	46	121	440
Hordeum vulgare	359	895	12798	13734	10	65	3109
Ipomoea nil	118	423	1894	1964	45	89	397
Ipomoea triloba	18	119	213	547	7	10	39
Jatropha curcas	1	10	12	61	2	-	-
Juglans microcarpa x Juglans regia	37	125	585	720	3	9	40
Juglans regia	20	54	698	1021	1	3	16
Klebsormidium nitens	-	-	-	2	-	-	-
Lactuca saligna	87	136	5097	7859	2	122	2959
Lactuca sativa	47	453	2515	6646	12	91	2179
Lupinus angustifolius	7	29	211	527	-	1	3
Macadamia integrifolia	15	13	427	430	-	9	11
Macleaya cordata	2	5	168	424	1	8	15
Malus baccata	9	68	516	1256	8	10	73
Malus domestica	36	256	1620	2160	18	60	361
Mangifera indica	12	50	324	536	2	-	9
Manihot esculenta	48	43	591	277	54	25	38
Marchantia paleacea	2	12	377	247	2	-	2
Marchantia polymorpha	-	1	11	28	1	-	2
Medicago truncatula	12	20	580	504	-	7	47
Micractinium conductrix	-	-	1	-	-	-	-
Mikania micrantha	163	419	8371	5938	17	44	556
Momordica charantia	2	8	55	88	2	-	-
Morella rubra	2	20	83	252	2	3	4
Morus notabilis	8	48	281	355	-	-	10
Mucuna pruriens	3	-	53	16	-	-	-
Musa acuminata	1	8	108	76	-	2	-
Musa balbisiana	7	22	469	448	-	14	151
Nelumbo nucifera	7	44	287	340	12	1	3
Nicotiana attenuata	115	155	2666	2208	10	24	1068
Nicotiana sylvestris	48	67	935	721	5	6	110
Nicotiana tabacum	89	166	1843	1328	12	22	205
Nicotiana tomentosiformis	41	30	734	476	4	8	37
Nymphaea colorata	17	367	168	1266	24	-	5
Nyssa sinensis	520	247	2299	1111	17	7	153
Olea europaea	26	97	1047	1321	13	2	38
Oryza brachyantha	-	1	30	32	-	-	2
Oryza sativa Japonica	29	25	908	425	4	3	102
Ostreococcus lucimarinus	-	-	-	1	-	-	-
Ostreococcus tauri	-	-	-	2	-	-	-
Panicum hallii	54	26	2199	536	2	1	213
Panicum virgatum	99	85	2951	2330	27	21	541
Papaver somniferum	667	346	8426	3763	56	124	3080
Parasponia andersonii	7	10	244	109	-	-	2
Perilla frutescens	193	454	3323	3117	9	22	167
Phalaenopsis equestris	-	3	8	56	-	-	1
Phaseolus vulgaris	7	12	288	243	5	2	4
Phoenix dactylifera	66	166	1596	4194	7	27	74
Phtheirospermum japonicum	114	112	1390	1321	2	3	96
Physcomitrella patens	10	1	2535	155	-	-	8
Pistacia vera	16	62	921	1204	14	8	22
Populus alba	35	89	598	738	9	3	48
Populus euphratica	3	6	84	100	-	-	11
Populus trichocarpa	16	64	283	421	-	1	47
Prosopis alba	149	350	521	776	-	10	138
Prunus avium	1	11	36	143	1	-	2
Prunus dulcis	3	31	119	271	3	-	16
Prunus mume	1	6	36	128	1	-	7
Prunus persica	24	43	208	532	4	-	121
Punica granatum	12	57	256	449	3	2	7
Pycnococcus provasolii	-	-	-	1	-	-	5
Pyrus ussuriensis x Pyrus communis	27	96	761	1247	14	11	501
Pyrus x bretschneideri	3	45	122	831	5	2	36
Quercus lobata	182	74	1421	1404	59	17	493
Quercus suber	112	94	1256	1490	52	56	213
Raphanus sativus	8	56	196	647	-	6	4
Raphidocelis subcapitata	5	-	2	1	-	-	-
Rhamnella rubrinervis	-	16	83	298	3	-	2
Rhododendron simsii	47	27	856	966	14	20	44
Rhododendron williamsianum	-	1	36	43	2	1	-
Ricinus communis	11	58	180	258	3	-	64
Rosa chinensis	31	111	1106	3190	60	38	350
Salix brachista	38	265	404	1850	11	18	28
Salvia splendens	334	310	4041	3354	59	53	260
Selaginella moellendorffii	131	-	304	25	-	6	218
Sesamum indicum	21	9	138	209	1	3	5
Setaria italica	13	13	623	546	-	-	12
Setaria viridis	15	4	674	522	-	1	6
Sinapis alba	32	62	409	656	1	-	14
Solanum chilense	1	3	24	63	-	-	2
Solanum lycopersicum	8	106	511	792	1	3	17
Solanum pennellii	2	172	287	1423	1	5	40
Solanum tuberosum	5	41	213	498	3	9	15
Sorghum bicolor	78	26	4979	864	2	2	574
Spatholobus suberectus	15	58	312	961	40	2	21
Spinacia oleracea	28	55	879	1563	-	4	349
Striga asiatica	61	44	1041	940	8	1	97
Tarenaya hassleriana	2	14	73	324	1	1	4
Telopea speciosissima	50	445	965	2436	30	9	560
Tetrabaena socialis	-	-	8	1	-	1	-
Theobroma cacao	-	4	49	184	1	-	1
Trema orientale	3	13	147	263	-	-	5
Trifolium pratense	109	70	889	1818	6	25	418
Trifolium subterraneum	6	13	85	295	1	3	15
Tripterygium wilfordii	37	143	447	467	12	7	35
Vigna angularis	35	25	448	449	3	32	43
Vigna radiata	15	41	251	242	7	8	7
Vigna unguiculata	61	61	832	852	5	6	41
Vitis vinifera	23	327	427	764	39	3	49
Volvox africanus	9	-	224	38	-	-	3
Volvox carteri	1	-	36	11	-	-	-
Zea mays	80	226	3146	1933	3	54	29
Zingiber officinale	441	846	7194	11800	161	744	4421
Ziziphus jujuba	9	17	117	347	2	-	3
Zostera marina	13	10	238	266	-	8	8
Total	10286	19176	224906	218414	1768	3147	42497
