# Supplementary material for: PlantLTRdb: An interactive database for 195 plant species LTR-retrotransposons
Source: Front Plant Sci. 2023 Mar 6;14:1134627. doi: 10.3389/fpls.2023.1134627 (PMC10025401; doi:10.3389/fpls.2023.1134627)
Supplement: Supplementary file 8 [file Table_4.xlsx]

## Sheet: Autonomous(Copia)
Table S4: The first quartile, median, third quartile, minimum, and maximum of LTR-RT length for the 195 plant species
		Autonomous (Copia)
Species name	First Quartile	Maximum	Median	Minimum	Third Quartile
Abrus precatorius	4969	6674	5658	4548	5678
Acer yangbiense	5093	16426	5258.5	3816	9841
Actinidia rufa	5031.5	6010	5332	4542	5456.5
Aegilops tauschii	5221.5	14075	8717	4030	8794
Amborella trichopoda	5050	5494	5095	5005	5294.5
Ananas comosus	4900	11086	6294	4799	7484
Apium graveolens	5216	23636	12102	4242	13226.5
Aquilegia coerulea	4718	5248	4792	4596	4997.5
Arabidopsis lyrata	4949	6122	5035.5	4521	5479.5
Arabidopsis thaliana	4791.5	5453	5041.5	4785	5369
Arachis duranensis	4903	5582	5279.5	4315	5500.5
Arachis ipaensis	5022	7033	5355.5	4567	5882.5
Asparagus officinalis	5018.5	5909	5099	4468	5388.5
Benincasa hispida	5319	6011	5648	4684	5744
Beta vulgaris	4873	5868	5077	4427	5273
Brachypodium distachyon	5146.5	5412	5305	4924	5320.5
Brassica cretica	4584.5	5961	4785.5	4455	5163
Brassica napus	4787.5	7251	5173	3384	6180.5
Brassica oleracea	4650	5284	4793	4208	4997
Brassica rapa	5158	6655	5995	4460	6093.5
Buddleja alternifolia	4992.5	6920	5140	4617	5765.5
Cajanus cajan	4552.5	6048	4904.5	4431	5539
Camelina sativa	4795	5576	4887	4433	5157
Camellia sinensis	5202	6816	5408	4282	5849
Cannabis sativa	4880	10857	5109.5	4666	7351
Capsella rubella	4789.5	5677	4922.5	4423	5206.5
Capsicum annuum	4774	6148	4858.5	4539	5348
Capsicum baccatum	4630	6461	5075	3552	5374
Capsicum chinense	5030.5	6575	5419	4360	5790.5
Carex littledalei	4894.5	5148	4934	4764	5013
Carica papaya	4772	4781	4779	4772	4781
Carpinus fangiana	5109	5954	5289.5	5008	5447
Carya illinoinensis	4768	6215	5267.5	4518	5583
Cephalotus follicularis	4978	10307	5251	4053	7211
Ceratodon purpureus	5625	6077	5689	5174	6045
Chenopodium quinoa	4950	15119	5210	4300	9246
Cicer arietinum	4818.5	5254	5069.5	4598	5076.5
Cinnamomum micranthum f. kanehirae	5251	5716	5401	4834	5531
Citrus clementina	4987	5589	5293.5	4595	5412
Citrus sinensis	4957	5411	5145	4491	5342
Citrus unshiu	5163	5466	5267	4859	5391
Coffea arabica	4953.5	17302	9348	4647	9997.5
Coffea canephora	4801	5385	4840.5	4691	5205.5
Coffea eugenioides	4793	13062	5046.5	4328	8213
Corchorus olitorius	4635.5	6369	4720	4578	5379
Corymbia citriodora subsp. variegata	5065.5	6618	5567	4763	6008
Cucumis melo	5247	8729	5368.5	5132	7052
Cucumis sativus	5160	10128	5248	4804	8012
Cucurbita maxima	4825	5255	5002	4535	5089
Cucurbita moschata	4616	5324	4881	4279	4906
Cucurbita pepo	4717	4821	4819	4573	4819.5
Cuscuta australis	4814.5	6472	4913.5	3999	5649.5
Cuscuta campestris	4712.5	5871	4918	4229	5178
Cynara cardunculus var. scolymus	4541.5	15486	5670	4392	12851
Daucus carota	5128.5	16239	5746	3602	12829.5
Dendrobium catenatum	4487.5	5536	4546	3746	5101
Dichanthelium oligosanthes	5106	6481	5290	4967	5908
Dioscorea cayenensis subsp. rotundata	4795	5701	4979	4347	5206
Dorcoceras hygrometricum	4699	5214	4813.5	4417	4969
Durio zibethinus	5013.5	5570	5327	4586	5333
Elaeis guineensis	4798	5671	4927.5	4343	5388.5
Eleusine coracana subsp. coracana	4951.5	13514	6973	4221	10682
Ensete ventricosum	5213	5213	5213	5213	5213
Eragrostis curvula	5209	8685	5730	4768	6693
Erigeron canadensis	6321	20898	11830.5	4559	12676
Erythranthe guttata	6974	12481	9625	4684	9786
Eucalyptus grandis	5135	10525	5658	4318	8878
Eutrema salsugineum	4738	5424	4843	4576	5251
Glycine max	4656	7310	4873	3478	5969
Glycine soja	4655	6235	4878	3478	6233
Gossypium arboreum	4857.5	5689	5086	4486	5429.5
Gossypium australe	4722	6063	4861	4411	5354
Gossypium darwinii	4952.5	5972	5046	4442	5377.5
Gossypium hirsutum	4716	5758	4979	3991	5221
Gossypium raimondii	4661.5	5153	4774	4480	4900
Handroanthus impetiginosus	4748	5324	4872.5	4578	4979
Herrania umbratica	5570	5570	5570	5570	5570
Hevea brasiliensis	4795.5	5415	4858	4409	5054
Hibiscus syriacus	4759	16420	5103	3499	9544
Hordeum vulgare subsp. vulgare	8870	8984	8942	8726	8972.5
Ipomoea nil	4826.5	10703	5030	3976	7336
Ipomoea triloba	4899.5	8452	5013	3406	6445.5
Jatropha curcas	4899	5466	5123	4823	5210
Juglans microcarpa x Juglans regia	4806	5990	5146	3915	5467
Juglans regia	4610	5603	5036	4208	5298
Lactuca saligna	5372	17290	7830	4284	10180.5
Lactuca sativa	7808	20625	10116	3472	13015
Lupinus angustifolius	4703	5718	4772	4530	5113
Macadamia integrifolia	5042	6063	5610	4877	5788
Macleaya cordata	5209	6094	5303	5209	6094
Malus baccata	4918	5341	5008.5	4687	5098.5
Malus domestica	4937	5735	5033	4438	5288
Mangifera indica	4776	5470	4987.5	4277	5183
Manihot esculenta	4845.5	5589	5034	4508	5205
Marchantia paleacea	6169.5	6877	6427.5	5589	6681
Marchantia polymorpha	6447	6447	6447	6447	6447
Medicago truncatula	4921.5	5305	5038.5	4712	5246.5
Mikania micrantha	4814	21573	11629	4211	11764.5
Momordica charantia	4779	6332	5039.5	4527	5504
Morella rubra	4771.5	6303	5053.5	4091	5427.5
Morus notabilis	4984	5307	5095	4813	5166
Musa acuminata	5325	6279	5400.5	4596	5847.5
Musa balbisiana	5143	11630	6990	4284	9462
Nelumbo nucifera	5041.5	6224	5330	4499	5533.5
Nicotiana attenuata	5225	15631	5763	4703	9594
Nicotiana sylvestris	5083.5	12491	5412	4567	8243.5
Nicotiana tabacum	5111	13301	5522	3844	8721
Nicotiana tomentosiformis	5265	10933	5564	4897	8853
Nymphaea colorata	5220	5736	5320	4893	5438
Nyssa sinensis	4933	5449	4997	4647	5142.5
Olea europaea	4771	5933	4947	4393	5287
Oryza brachyantha	4955	4955	4955	4955	4955
Oryza sativa Japonica	5020	6166	5389	4724	5758
Panicum hallii	5057	10274	5796.5	4650	7482
Panicum virgatum	5563	13440	6118	4712	10714
Papaver somniferum	4766	6205	4975.5	4099	5353
Parasponia andersonii	5049	5615	5411	4312	5615
Perilla frutescens var. frutescens	4967	9986	5194	3842	6975
Phalaenopsis equestris	5211	5721	5269	5153	5495
Phaseolus vulgaris	4481.5	5365	4532.5	3878	5045
Phoenix dactylifera	9468	13055	10513	6773	11686
Phtheirospermum japonicum	4998	5847	5307	4509	5429
Physcomitrella patens	7125	7125	7125	7125	7125
Pistacia vera	4858	9831	5594.5	4047	7084
Populus alba	4800	5473	4863	4446	5080
Populus euphratica	4861	5019	4902.5	4669	5019
Populus trichocarpa	4734	5355	4836.5	4502	5062.5
Prosopis alba	4860	5587	5018	4446	5158
Prunus avium	4753.5	5013	4842	4636	4997.5
Prunus dulcis	4931.5	5049	4945	4876	4994
Prunus mume	4908	4912	4910.5	4908	4912
Prunus persica	4905	5123	4950	4869	5015.5
Punica granatum	5059	5450	5127	4924	5220
Pyrus ussuriensis x Pyrus communis	4976.5	5364	5053	4726	5148.5
Pyrus x bretschneideri	4875	5428	4996	4476	5147
Quercus lobata	5099	5376	5133	4925	5219
Quercus suber	5118	6320	5319.5	4581	5639
Raphanus sativus	4709	4944	4784	4543	4875.5
Rhamnella rubrinervis	4878.5	5028	4963	4780	5014.5
Rhododendron simsii	4902	6047	5101	4748	5385.5
Rhododendron williamsianum	5500	5500	5500	5500	5500
Ricinus communis	4739	5431	4939.5	4404	5048
Rosa chinensis	5149.5	9749	6983	4970	7185
Salix brachista	4831	5793	5000	4244	5230
Salvia splendens	5173	5830	5317.5	4735	5475
Sesamum indicum	4933	5127	5006	4913	5049
Setaria italica	4999	7369	5107	4797	5962
Setaria viridis	4859	5511	5037	4686	5276.5
Sinapis alba	4763	5739	4905	4289	5157
Solanum chilense	4856.5	6604	5425	4288	6014.5
Solanum lycopersicum	4728	6674	5296.5	4001	5545
Solanum pennellii	4717.5	5635	4732	4435	5196.5
Solanum tuberosum	4795	5622	5107	4267	5366
Sorghum bicolor	5260	14043	5535	4769	10179
Spatholobus suberectus	4710	10742	4716.5	4140	7307
Spinacia oleracea	5135.5	14998	5635	4606	10052
Striga asiatica	4908	5375	5018	4715	5219.5
Tarenaya hassleriana	4820	5776	4947	4576	5286
Telopea speciosissima	5414	6446	5595	4778	5851
Theobroma cacao	4762	5547	4982	4743	5365
Trema orientale	5027	5529	5163	4914	5330
Trifolium pratense	4810	14054	5233	4094	8544
Trifolium subterraneum	4795	10392	5289	4605	8223
Tripterygium wilfordii	4819	5379	5007	4377	5170.5
Vigna angularis	4649	5124	4848	4320	5032
Vigna radiata	4750	6000	4980	4376	5310
Vigna unguiculata	4720	5448	4856	4367	5089
Vitis vinifera	4992.5	5430	5065	4731	5167.5
Zea mays	8965	9569	9379	8236	9481
Zingiber officinale	4876	17378	7765.5	3806	9948
Ziziphus jujuba	5100	7772	5601	4860	6195
Zostera marina	5770	6474	5943.5	5203	6185

## Sheet: Autonomous(Gypsy)
Autonomous(Gypsy)
Species name	First Quartile	Maximum	Median	Minimum	Third Quartile
Abrus precatorius	5348.5	13802	5514	5116	9653
Acer yangbiense	6613.5	15622	11059	5148	12379.5
Actinidia rufa	5942.5	6815	6575	5017	6774
Aegilops tauschii	8501	21188	10861	4984	13650.5
Ananas comosus	5881.5	8430	6436	5327	7433
Apium graveolens	10402	16540	11261	6695	12902
Apostasia shenzhenica	5523	8811	7167	5523	8811
Aquilegia coerulea	9778	10817	9958	8819	10461
Arabidopsis lyrata	5387	18016	10756	5114	11493
Arachis duranensis	9159	12680	9989	7199	10595
Arachis ipaensis	9573	12689	10438	8284	10838
Asparagus officinalis	5907	18643	6030.5	5365	12090
Astrephomene gubernaculifera	6473	7485	7349	6354	7454.5
Benincasa hispida	5376.5	6064	5459	4964	5971
Beta vulgaris	5338	8273	5556	5239	7443.5
Brachypodium distachyon	7784	14418	13918	5227	13986
Brassica cretica	5444.5	5920	5465.5	5437	5699.5
Brassica napus	5252	16928	6347.5	5033	11458
Brassica oleracea	5272	7229	5358	4688	6346.5
Brassica rapa	6692	13395	7293	5039	11304
Buddleja alternifolia	5539	20972	10436	4292	12931
Cajanus cajan	5164	10098	5188	4681	7208
Camelina sativa	5302	12574	5462	5023	10867
Camellia sinensis	11299.5	13034	11748.5	10308	12004.5
Cannabis sativa	5404.5	15304	9243.5	5307	12408.5
Capsella rubella	4833.5	12457	8784.5	4499	12429
Capsicum annuum	12672	12689	12676	12667	12679
Capsicum baccatum	9031.5	17043	12214	4959	12489
Capsicum chinense	5267	10420	5505.5	4823	7505
Carex littledalei	5765	13594	13243	4951	13460
Carpinus fangiana	5368	6247	5831.5	5323	6247
Carya illinoinensis	5582.5	5669	5588	5529	5631.5
Cephalotus follicularis	10844	13197	11532	9478	11827.5
Ceratodon purpureus	9159	9393	9257	9132	9342
Chenopodium quinoa	6227	19223	11265	5062	11727
Chlamydomonas eustigma	6468	6562	6515	6468	6562
Cicer arietinum	5484	5484	5484	5484	5484
Cinnamomum micranthum f. kanehirae	5171.5	12209	5524.5	4972	8850.5
Citrus clementina	5435	6760	5535.5	5003	6171
Citrus sinensis	5217	5494	5296.5	5080	5454.5
Citrus unshiu	8160	11980	11013	5307	11496.5
Coffea arabica	7442	15172	9627	5194	10577.5
Coffea canephora	8810.5	10199	9609.5	8475	9714
Coffea eugenioides	5742	15433	7601	5183	9646
Corchorus olitorius	5137	7288	5319	5043	6422
Corymbia citriodora subsp. variegata	5673	5721	5694	5656	5702
Cucumis melo	4888	5773	5673	4199	5771
Cucumis sativus	5372	5795	5791	5149	5795
Cucurbita maxima	5183	5774	5478.5	5183	5774
Cucurbita moschata	5760	8062	6716	5702	6730
Cucurbita pepo	5750	6731	5750	4985	6260
Cuscuta australis	6283	12681	10450	5043	10808
Cuscuta campestris	5345	12356	8024.5	5252	10774
Cynara cardunculus var. scolymus	5079	5339	5241.5	5023	5339
Daucus carota	5630	18592	9776	5162	12287
Dendrobium catenatum	5125	5279	5192	5125	5235
Dichanthelium oligosanthes	6500	12551	8248.5	6370	11209
Dioscorea cayenensis subsp. rotundata	5304	6356	5481	5166	5856
Dorcoceras hygrometricum	5221	5600	5297	4950	5451
Durio zibethinus	5689	15020	8733	5651	13570
Elaeis guineensis	5994.5	11397	8363.5	5467	10801
Eleusine coracana subsp. coracana	5623.5	19818	7739	4768	11707.5
Ensete ventricosum	6256	6391	6323.5	6256	6391
Eragrostis curvula	5539.5	15448	6076	4931	9856
Erigeron canadensis	5005	5392	5064	4934	5345
Erythranthe guttata	7157	13934	10338	5369	10552.5
Eucalyptus grandis	5614	13517	5794.5	5578	9273
Eutrema salsugineum	6908	14821	7177	5042	10659
Fragaria vesca	5799	5967	5883	5799	5967
Glycine max	5131	13219	5288	4536	9139
Glycine soja	5119	6620	5238.5	4557	5959
Gossypium arboreum	8957.5	13105	11442	5683	11516
Gossypium australe	10315	16325	11166.5	6724	12759
Gossypium darwinii	8610.5	15379	11110	4728	11462
Gossypium hirsutum	5795	17829	10385.5	5042	11102
Gossypium raimondii	5795.5	17525	8615	5193	16161
Handroanthus impetiginosus	5510	10400	9788.5	4616	10094
Herrania umbratica	5730	5730	5730	5730	5730
Hevea brasiliensis	5634	12265	7821	5045	8362
Hibiscus syriacus	5567.5	15592	5716	4975	9669
Hordeum vulgare subsp. vulgare	10175.5	16623	12186	5362	13468.5
Ipomoea nil	5465	14889	7197	4976	9342
Ipomoea triloba	5306	10185	6454	4716	7354
Jatropha curcas	5596	5596	5596	5596	5596
Juglans microcarpa x Juglans regia	5377	7088	5527	5135	6858
Juglans regia	5483.5	7095	5543.5	5185	6822.5
Lactuca saligna	8541	13142	9383	5439	10681.5
Lactuca sativa	5446	13140	6734	4974	8627.5
Lupinus angustifolius	5184	5695	5238	5101	5442.5
Macadamia integrifolia	5937.5	13889	10101	4569	10300.5
Macleaya cordata	6729	13454	10091.5	6729	13454
Malus baccata	5432	13875	5877	5099	11339
Malus domestica	5781.5	18363	5815.5	4820	13061.5
Mangifera indica	5138	7490	5782.5	5086	6526
Manihot esculenta	8787.5	15351	11452.5	4897	13241.5
Marchantia paleacea	7763	10026	8894.5	7763	10026
Medicago truncatula	5155	10327	5324.5	5100	8837
Mikania micrantha	5188	23037	9459	4240	12357.5
Momordica charantia	4979	5205	5092	4979	5205
Morella rubra	6862	13065	9963.5	6862	13065
Morus notabilis	5528.5	11285	5590	5449	8296.5
Mucuna pruriens	8980.5	9073	9039	8922	9056
Musa acuminata	9861	9861	9861	9861	9861
Musa balbisiana	5644.5	6423	5649	5583	6037
Nelumbo nucifera	5124.5	5579	5309	4989	5449
Nicotiana attenuata	10417	12499	10983	9533	11250
Nicotiana sylvestris	10669	13961	10920.5	8651	12217.5
Nicotiana tabacum	10139	12607	10901	8566	11488
Nicotiana tomentosiformis	10459	12497	11235	8836	11542
Nymphaea colorata	5444	5536	5464	5430	5529
Nyssa sinensis	10355	13925	11471	8228	11829.5
Olea europaea	5419	12912	6839.5	5117	10189
Oryza sativa Japonica	8903	13159	12036	5469	12900
Panicum hallii	7654	16484	12101.5	7356	14122
Panicum virgatum	8863	22328	12089	4983	16080.5
Papaver somniferum	11046.5	17322	13327	7214	13723
Parasponia andersonii	6344	12686	11061	5292	11390
Perilla frutescens var. frutescens	5787	15555	6760	4989	10158
Phaseolus vulgaris	7057	14814	9401	4858	12394.5
Phoenix dactylifera	6806	16212	11314	5508	12293
Phtheirospermum japonicum	10766	13169	11322	9423	11740
Physcomitrella patens	8537	8805	8668.5	8530	8805
Pistacia vera	5423	12443	9135	5222	10484
Populus alba	5248	7996	5326	4585	6367.5
Populus euphratica	6211.5	7788	7223	5200	7505.5
Populus trichocarpa	5130.5	5298	5217	4975	5257
Prosopis alba	5172	9638	5668	4883	6959
Prunus avium	5496	5496	5496	5496	5496
Prunus dulcis	10316.5	10611	10324	10309	10467.5
Prunus mume	11002	11002	11002	11002	11002
Prunus persica	10257	10551	10335	10096	10452.5
Punica granatum	5244	5343	5278	5198	5340.5
Pyrus ussuriensis x Pyrus communis	5810	21527	5842	5614	13827
Pyrus x bretschneideri	5173	11807	5470	4876	8638.5
Quercus lobata	10275	11399	10442.5	9736	10754
Quercus suber	10104	11698	10375.5	9311	10844
Raphanus sativus	5341.5	12536	5440	5273	11579.5
Rhamnella rubrinervis	5290	5798	5597	5012	5798
Rhododendron simsii	5688	14540	11053	5065	11436.5
Ricinus communis	5370	6986	6760	4659	6954
Rosa chinensis	5830.5	16263	8384	5402	13748
Salix brachista	5126	6013	5307.5	4961	5492
Salvia splendens	6475	15724	7843.5	5192	10959
Selaginella moellendorffii	5005	5049	5017	4980	5025.5
Sesamum indicum	9145	10447	9628	8502	10010
Setaria italica	13116	14099	13275	12112	14004
Setaria viridis	10072	15086	13161	6761	13496
Sinapis alba	9721.5	11333	10063.5	9016	10391.5
Solanum chilense	4422	4422	4422	4422	4422
Solanum lycopersicum	7557.5	12151	9358	6202	9855
Solanum pennellii	9948	15778	12863	9948	15778
Solanum tuberosum	5467	14091	9454	5080	10583
Sorghum bicolor	12355	14999	13459.5	11408	13529
Spatholobus suberectus	5347	14109	6721	4987	8950
Spinacia oleracea	5608	16987	10192.5	5185	11514
Striga asiatica	6236	15287	11420	5410	11955
Tarenaya hassleriana	6951	7008	6979.5	6951	7008
Telopea speciosissima	5260	15437	9873.5	4695	10684
Trema orientale	5221.5	11111	5244	5199	8177.5
Trifolium pratense	9086	16677	11651	4942	12209
Trifolium subterraneum	5263	5477	5412.5	5226	5453
Tripterygium wilfordii	5294	5905	5379	5022	5565
Vigna angularis	5146.5	5406	5230	5021	5392
Vigna radiata	5139	6559	5295	4959	5957
Vigna unguiculata	7166	12646	8516	4723	9625
Vitis vinifera	6296	13619	10340	5016	10471
Volvox africanus	7693	7849	7698	7687	7840
Volvox carteri	6547	6547	6547	6547	6547
Zea mays	9337	16047	11786	5362	13255.5
Zingiber officinale	9550	12990	10564	7890	10933
Ziziphus jujuba	5658	5836	5758	5658	5774
Zostera marina	5797	11761	9307	5206	9398

## Sheet: Nonautonomous(Copia)
Nonautonomous(Copia)
Species name	First Quartile	Maximum	Median	Minimum	Third Quartile
Abrus precatorius	4607	6816	4920.5	3239	5657
Acer yangbiense	6199	15693	9394	1613	10008
Actinidia rufa	3707	9828	4972	1589	6160.5
Aegilops tauschii	8566	14189	8732	5188	10818.5
Amborella trichopoda	3704	7924	5222	2179	5595
Ananas comosus	4913	11361	5803	1387	7820
Apium graveolens	7975	21132	12254.5	1415	13242
Apostasia shenzhenica	3640	6376	4691	2738	4906
Aquilegia coerulea	4864	14031	5918.5	1186	8542.5
Arabidopsis lyrata	4788	7980	5255	2921	6102
Arabidopsis thaliana	4659	5838	4957	4021	5182.5
Arachis duranensis	4602	6712	5259	3267	5580
Arachis ipaensis	4308	8372	5214	1949	5958.5
Asparagus officinalis	4812.5	9467	5515	1972	6707
Astrephomene gubernaculifera	5119	5703	5333	5119	5684.5
Benincasa hispida	4985	11802	5649	1215	7712
Beta vulgaris	4780	6244	5096	3974	5368
Brachypodium distachyon	4999	11853	5324	1453	7796
Brassica cretica	2555	8583	4556.5	1152	5027
Brassica napus	4671.5	8312	5124	2471	6149.5
Brassica oleracea	4479.5	5650	4678.5	3780	4953.5
Brassica rapa	4704	7948	5009	2904	6050
Buddleja alternifolia	4991	16940	5632	1299	9782
Cajanus cajan	4406	7187	4820	2707	5588
Camelina sativa	4614	7207	4909	3064	5653
Camellia sinensis	4947.5	10978	5648	1422	7368
Cannabis sativa	5365	17302	7277	1487	10140.5
Capsella rubella	4722.5	5990	4908	3976	5301.5
Capsicum annuum	4253	7909	5015.5	2121	5717
Capsicum baccatum	4343.5	8117	5051	2086	5856.5
Capsicum chinense	4211	8388	5013	1712	5904
Carex littledalei	4878	7642	5053	3237	5988
Carica papaya	4740.5	5331	4909	4469	4994
Carpinus fangiana	4693	7318	5138	3132	5754
Carya illinoinensis	4906	10895	5388	1249	7375
Cephalotus follicularis	4640	16451	6237	1224	9404.5
Ceratodon purpureus	5284	6633	5483	4470	5920
Chenopodium quinoa	5128	17316	6046	1252	10012
Chlamydomonas eustigma	1921.5	5095	2406.5	1690	3877.5
Chlamydomonas reinhardtii	2330	6118	3080.5	2319	6021
Chondrus crispus	6570	9836	7132	4625	7886
Cicer arietinum	3945.5	7817	4844	1637	5558
Cinnamomum micranthum f. kanehirae	4917	8439	5471	2818	6326
Citrus clementina	5046	8582	5352	3223	6490
Citrus sinensis	4853	7219	5218	3636	5808
Citrus unshiu	5001	6377	5271	4136	5581.5
Coffea arabica	4003.5	12863	5269	1338	7587
Coffea canephora	3845.5	8224	4714.5	1438	5605.5
Coffea eugenioides	4086.5	12667	5387.5	1171	7546.5
Corchorus capsularis	4508	8185	4806	2309	5983.5
Corchorus olitorius	2686	9666	4698.5	1244	5658
Corymbia citriodora subsp. variegata	4955	9218	5573	2352	6695
Cucumis melo	4724	7972	5039	2966	6111.5
Cucumis sativus	4836	6655	5128	4211	5589.5
Cucurbita maxima	4515	5379	4642	3892	4938
Cucurbita moschata	3270.5	6472	4618	1392	4706
Cucurbita pepo	3393	6486	4598	1803	4656
Cuscuta australis	4263	10092	4900	1224	6597
Cuscuta campestris	2916.5	7949	4461	1221	5025
Cynara cardunculus var. scolymus	4656	21350	6390	1251	12860
Daucus carota	4746	12382	5233	1328	7829
Dendrobium catenatum	4484.5	5213	4567	4050	4776.5
Dichanthelium oligosanthes	4084	6911	5173	2121	5411.5
Dioscorea cayenensis subsp. rotundata	4738	6365	5038	3770	5390
Dorcoceras hygrometricum	4677.5	15801	5945	1187	9162
Dunaliella salina	2114	5252	2128	2105	3925
Durio zibethinus	4096.5	6785	4266.5	2585	5183
Elaeis guineensis	4794	6365	5013.5	3905	5497
Eleusine coracana subsp. coracana	5193.5	15034	6734	1535	9168
Ensete ventricosum	3532	8139	5410	2311	7446
Eragrostis curvula	4956	10469	5881	1635	7172
Erigeron canadensis	6330.5	21267	9677	2003	12429.5
Erythranthe guttata	5074	16610	6940.5	1436	9747.5
Eucalyptus grandis	5619.5	15237	7295.5	1528	9474
Eutrema salsugineum	4643	8869	5227	2121	6356
Fragaria vesca	4791	9248	5642	2244	6656
Glycine max	4770	15583	6235	1557	9289.5
Glycine soja	4792	16137	6352.5	1557	9358
Gonium pectorale	2008.5	4576	2302	1715	3439
Gossypium arboreum	4544	6567	5001	3332	5362
Gossypium australe	4832	9309	5063	2142	6683
Gossypium darwinii	3917	7472	4973.5	1785	5347
Gossypium hirsutum	4034	7083	4939.5	2228	5259
Gossypium raimondii	4174.5	6169	4804.5	3080	4989
Handroanthus impetiginosus	4761.5	7328	5065	3225	5802
Herrania umbratica	4565	5670	4930	3625	5498
Hevea brasiliensis	4814	17930	6810	1327	10114
Hibiscus syriacus	4893.5	15289	5128	1448	9067
Hordeum vulgare subsp. vulgare	8617	9479	8920	8096	8966
Ipomoea nil	4452.5	11065	5093.5	1254	7130.5
Ipomoea triloba	4430	8779	4976	1998	6278.5
Jatropha curcas	4797	9218	5229	2329	6570
Juglans microcarpa x Juglans regia	4609	6649	4938	3400	5425
Juglans regia	4686	6538	5002	3587	5447
Klebsormidium nitens	3177	4889	4033	3177	4889
Lactuca saligna	7658	8412	7818	7197	7967
Lactuca sativa	7774	17810	7896.5	1753	11793
Lupinus angustifolius	4644	6038	5011	3780	5255.5
Macadamia integrifolia	4730	9926	5268	1724	6810
Macleaya cordata	4914.5	8636	5540	2631	6443
Malus baccata	4819.5	8310	5234.5	2757	6228.5
Malus domestica	4949.5	9638	5480	2198	6825
Mangifera indica	4733	8404	5212.5	2541	6245
Manihot esculenta	4063	5895	4528	2732	5048
Marchantia paleacea	5209.5	7003	5319	4204	5934
Marchantia polymorpha	5105	8458	5470.5	3138	6498
Medicago truncatula	4729	20937	5299	1403	11253
Mikania micrantha	4938	23754	10188	1285	12531
Momordica charantia	3065.5	7714	4687.5	1636	5214
Morella rubra	4686.5	10797	5170.5	1210	7140.5
Morus notabilis	4871	6091	5064	4093	5394.5
Mucuna pruriens	3339	6513	4129.5	2040	4753.5
Musa acuminata	3641.5	9439	4805.5	1815	6052.5
Musa balbisiana	5297.5	12854	7527	1497	8482
Nelumbo nucifera	4622	6725	5174	3373	5498
Nicotiana attenuata	4841	12733	5474.5	1374	8000
Nicotiana sylvestris	5011	13717	5476	1283	8495
Nicotiana tabacum	4921.5	11441	5410.5	1283	7543
Nicotiana tomentosiformis	4705.5	8161	5287	2627	6096.5
Nymphaea colorata	5078	6136	5299	4454	5504
Nyssa sinensis	4808.5	6655	5034	3716	5548.5
Olea europaea	4846	8664	5901	2555	6378
Oryza brachyantha	4799	5337	4900.5	4555	5166
Oryza sativa Japonica	5183	8120	6281	3318	6454
Ostreococcus lucimarinus	5737	5737	5737	5737	5737
Ostreococcus tauri	2169	2169	2169	2169	2169
Panicum hallii	5362	20171	6751.5	1954	11709
Panicum virgatum	5228	12167	6455	1446	8021
Papaver somniferum	4735	9565	5193	1835	6672
Parasponia andersonii	4951	5571	5081	4238	5549
Perilla frutescens var. frutescens	5179	15329	6914	1347	9239
Phalaenopsis equestris	3063.5	6548	4983.5	1700	5387.5
Phaseolus vulgaris	2798.5	11809	4804	1427	6408.5
Phoenix dactylifera	9726	14391	10647	6928	11593
Phtheirospermum japonicum	4865	15252	5627	1396	9030
Physcomitrella patens	4008.5	7004	5089	2802	5495
Pistacia vera	4962	10487	5612	1837	7176.5
Populus alba	4690	6016	4881.5	3918	5222
Populus euphratica	4770.5	5884	5282	3922	5377
Populus trichocarpa	4680	5983	4899	3928	5262
Prosopis alba	4983.5	12871	5829.5	1249	8171
Prunus avium	4342.5	6464	4845	3373	5289.5
Prunus dulcis	4441	6200	4905	3440	5174.5
Prunus mume	4232	6464	4878	3125	5166
Prunus persica	4506	6992	4951	3092	5506
Punica granatum	5004	7253	5427	3553	6024
Pycnococcus provasolii	1967	1967	1967	1967	1967
Pyrus ussuriensis x Pyrus communis	4830	8050	5128	2893	6136
Pyrus x bretschneideri	4821.5	7488	5088	3230	5902
Quercus lobata	5380	12768	7318.5	1257	8420.5
Quercus suber	5791	12038	7499.5	2211	8297
Raphanus sativus	4652	6298	4843	3679	5312.5
Raphidocelis subcapitata	5398	5398	5398	5398	5398
Rhamnella rubrinervis	4669	6875	4990	3356	5555
Rhododendron simsii	4766	8589	5348	2458	6309
Rhododendron williamsianum	3380.5	7128	4904	2153	5399.5
Ricinus communis	4760	5647	4985.5	4352	5124
Rosa chinensis	5724	9557	6562.5	3439	7261
Salix brachista	4722	5892	4933	4024	5190
Salvia splendens	4948	6660	5223	3922	5633
Selaginella moellendorffii	4105	4869	4772	3414	4850
Sesamum indicum	4979	6951	5136	3398	6094
Setaria italica	5357	12175	7811.5	1608	8156
Setaria viridis	5334	12108	7328	1565	8154
Sinapis alba	4651.5	7257	4851	3040	5730
Solanum chilense	4419.5	6803	5033	3455	5405
Solanum lycopersicum	4643.5	7454	5160	2998	5794
Solanum pennellii	4563.5	6989	5081	3179	5541
Solanum tuberosum	4730	6519	5136	3659	5456
Sorghum bicolor	5170	18183	6565.5	1228	10430.5
Spatholobus suberectus	4691	16098	5489	1819	9503
Spinacia oleracea	5336.5	18057	9484	1590	10452.5
Striga asiatica	5002	13758	6018.5	1801	8513.5
Tarenaya hassleriana	4510.5	6340	4909.5	3408	5253
Telopea speciosissima	5149.5	10009	5647.5	2248	7096.5
Tetrabaena socialis	4863	4863	4863	4863	4863
Theobroma cacao	4647.5	15679	5171.5	1444	9218
Trema orientale	4869	8534	5157	2922	6348.5
Trifolium pratense	4600	16517	5240	1348	9417
Trifolium subterraneum	4212	6979	4832	2573	5319.5
Tripterygium wilfordii	4786.5	6947	5034	3468	5709
Vigna angularis	3271	7969	4552	1205	5151
Vigna radiata	4095	7167	4727	2253	5345
Vigna unguiculata	4334.5	7498	4864	2465	5608.5
Vitis vinifera	4581	7500	4957	2818	5761
Volvox africanus	4859	5904	5061.5	3455	5904
Volvox carteri	3118	5554	4687	2166	5090
Zea mays	8897	10280	9013	8059	9458
Zingiber officinale	7271.5	13902	9502.5	3299	9925
Ziziphus jujuba	4841.5	8442	5452	2702	6292
Zostera marina	4545	7892	5208	2335	6044

## Sheet: Nonautonomous(Gypsy)
Nonautonomous(Gypsy)
Species name	First Quartile	Maximum	Median	Minimum	Third Quartile
Abrus precatorius	5233.5	23182	9523	1988	13221
Acer yangbiense	8975	17763	11596	3760	12494
Actinidia rufa	5522.5	17277	8751	1311	10491.5
Aegilops tauschii	8833	20055	10261	2132	13324
Amborella trichopoda	5291	5851	5844	4804	5851
Ananas comosus	5549	18295	9136.5	1757	10778.5
Apium graveolens	10867	18706	13344.5	6164	14003
Apostasia shenzhenica	7971	15331	10471	3243	12907.5
Aquilegia coerulea	7771.5	13072	9710	4604	9910.5
Arabidopsis lyrata	9192	15581	11501.5	5273	11813
Arabidopsis thaliana	6500.5	16296	10014	2092	11486
Arachis duranensis	8647	13689	9537.5	5603	10684
Arachis ipaensis	8897	17740	10329	3609	12445
Asparagus officinalis	5510	14262	7390	1430	9016
Astrephomene gubernaculifera	7029	19260	8087.5	5523	17252
Benincasa hispida	5438.5	18047	8921	1869	10514
Beta vulgaris	5571	19297	9000	1328	11072
Brachypodium distachyon	7845	19780	12215.5	2094	13479
Brassica cretica	4657	10783	5474	1602	7262
Brassica napus	5237	16645	6755	1629	9856
Brassica oleracea	5113	12320	5488.5	1595	8133
Brassica rapa	5302	14174	6913	2343	8934
Buddleja alternifolia	7167.5	19479	10024	1402	12152
Cajanus cajan	5444	17478	8429	1525	10392
Camelina sativa	5080	11926	5517	1691	7820
Camellia sinensis	9502.5	15516	11169	5900	11913.5
Cannabis sativa	8890	16802	10576	4139	12063
Capsella rubella	5061	11976	5384.5	2324	8791.5
Capsicum annuum	5072.5	20953	7802	1738	11617
Capsicum baccatum	7575	18740	9481	1717	12107
Capsicum chinense	4995	17945	7513	1204	10304
Carex littledalei	8370	20613	11470.5	2609	13272
Carica papaya	5596	9866	8351	3131	9365
Carpinus fangiana	3879.5	19997	6925	1671	11004
Carya illinoinensis	6609	14086	9190	2115	9605.5
Cephalotus follicularis	8849	16173	10197	4453	11790
Ceratodon purpureus	8587	18592	9364	3491	12782
Chara braunii	7367	9104	8783	6284	9018
Chenopodium quinoa	10113.5	14238	11418	7648	11766
Chlamydomonas eustigma	4410	7272	5625	4258	5954.5
Chlamydomonas reinhardtii	5156	7538	6693	3900	7079
Chlorella variabilis	6089	6926	6507.5	6089	6926
Chondrus crispus	8697	8697	8697	8697	8697
Cicer arietinum	5135	6839	5257	4016	6107.5
Cinnamomum micranthum f. kanehirae	3894	19937	6327	1443	10603
Citrus clementina	5621	22571	10710.5	1720	12430
Citrus sinensis	4025	19909	6295.5	1609	10890.5
Citrus unshiu	5214	16778	6839	1610	10940
Coccomyxa subellipsoidea	6683	7813	7248	6683	7813
Coffea arabica	5770.5	21731	9238	1724	12194.5
Coffea canephora	5459	17827	8448	2404	10722.5
Coffea eugenioides	5238	19936	8127	1760	11215
Corchorus capsularis	5262	18369	7600	1567	10597
Corchorus olitorius	5506	19378	8006	1621	11351
Corymbia citriodora subsp. variegata	3147.5	17910	5663.5	2369	9827
Cucumis melo	4270.5	6829	5248.5	2573	5438
Cucumis sativus	5026	6717	5320	3984	5799
Cucurbita maxima	5728.5	10870	5772	2433	8097
Cucurbita moschata	3674.5	13287	5744	1719	8089
Cucurbita pepo	4606	6020	5749	3472	5750
Cuscuta australis	7473	15515	9632	2416	10893
Cuscuta campestris	5325	16621	8948	1755	10741
Cynara cardunculus var. scolymus	4830	14451	5644.5	1470	8836
Daucus carota	5434.5	18062	7531	1413	10977.5
Dendrobium catenatum	5104.5	7161	5221.5	3982	5932.5
Dichanthelium oligosanthes	5140	19357	9874	1900	12215
Dioscorea cayenensis subsp. rotundata	6083.5	17117	9604.5	1896	10501.5
Dorcoceras hygrometricum	6194	14168	8691	1873	9532
Dunaliella salina	3604	7108	5190	1382	6045
Durio zibethinus	5685.5	14823	5930.5	3266	9545
Elaeis guineensis	5297	10981	5719	3035	10333
Eleusine coracana subsp. coracana	4653	18823	7768	1621	10343
Ensete ventricosum	4827	6578	5193	3294	5900
Eragrostis curvula	7016.5	21551	9253	1725	12874.5
Erigeron canadensis	6362	19885	9291	1742	11800
Erythranthe guttata	4272.5	19688	6946	1354	10535.5
Eucalyptus grandis	5776	22547	10119.5	2788	12595
Eutrema salsugineum	6917	19761	9578	1720	12069
Fragaria vesca	4401.5	15653	5865	2293	10838
Glycine max	5354	17724	6378.5	1542	10303
Glycine soja	5353.5	17702	6118	1542	10294
Gossypium arboreum	9267	14947	10466	5849	11552
Gossypium australe	8780.5	15947	10861	4498	11648
Gossypium darwinii	8882	15543	10737	4881	11550
Gossypium hirsutum	6924	17425	9706	1286	11125.5
Gossypium raimondii	5199	21850	7992	1996	11893
Handroanthus impetiginosus	7187	15836	10055.5	2723	11013.5
Herrania umbratica	5289	5972	5669	5289	5972
Hevea brasiliensis	7861	18271	10340	1778	12027.5
Hibiscus syriacus	5998	20757	9115.5	2117	11915.5
Hordeum vulgare subsp. vulgare	9446	20351	10247	2899	13814
Ipomoea nil	6686	15777	8779	1822	10354
Ipomoea triloba	5313	18795	8369	1668	10881
Jatropha curcas	5067.5	15283	5830.5	2127	9377.5
Juglans microcarpa x Juglans regia	5329	13094	6233	1461	8536
Juglans regia	5227	9636	5501.5	2796	6991
Lactuca saligna	8241	13874	9197	4862	10505
Lactuca sativa	8490.5	14322	9381	4941	10868.5
Lupinus angustifolius	5153	6411	5273	4530	5710.5
Macadamia integrifolia	3686.5	21062	7687	1696	10879
Macleaya cordata	2694.5	15665	4423	1522	8106.5
Malus baccata	7260	18928	9490	1796	12437
Malus domestica	8414.5	18651	9881	3161	12529.5
Mangifera indica	5419.5	14270	6629.5	2237	9039.5
Manihot esculenta	6174	15157	8797	1882	9930.5
Marchantia paleacea	7747	7797	7766	7706	7781
Marchantia polymorpha	7652	16608	7798	6726	11366
Medicago truncatula	7919.5	21940	8831	1362	13988
Micractinium conductrix	4117	4117	4117	4117	4117
Mikania micrantha	9746.5	18697	11781	4385	13332
Momordica charantia	4782.5	6907	5101	3784	5781
Morella rubra	5302.5	12023	5861	2290	8052
Morus notabilis	5368	17087	5740	1787	10703
Mucuna pruriens	8465	11074	8907	7562	9520
Musa acuminata	5237	6558	5382	4407	5910
Musa balbisiana	5327	8056	5540	3681	6425
Nelumbo nucifera	4965.5	17453	5934	1710	10227.5
Nicotiana attenuata	8651	18546	10659	2791	12611
Nicotiana sylvestris	8845	19071	10705	2784	12965.5
Nicotiana tabacum	8406	18253	10737	2567	12351
Nicotiana tomentosiformis	7965	17933	10783.5	2058	11966
Nymphaea colorata	5386	17893	8468.5	2854	12791.5
Nyssa sinensis	9820.5	14543	10834	6984	11714
Olea europaea	6106.5	20312	9900	1698	12747.5
Oryza brachyantha	4638	5775	5341.5	3347	5519
Oryza sativa Japonica	7741	19895	11328.5	2728	12649
Panicum hallii	11281.5	16191	11996	8309	13272.5
Panicum virgatum	7622	22548	11706	1575	13598
Papaver somniferum	8662	19989	9961	1881	13195
Parasponia andersonii	6892.5	15316	10749	3420	11222.5
Perilla frutescens var. frutescens	6229	20442	8937	1607	11960
Phalaenopsis equestris	3477.5	11054	5550.5	2794	9507.5
Phaseolus vulgaris	5483	19215	7841	1499	11681.5
Phoenix dactylifera	6600	17990	8689	1955	11170
Phtheirospermum japonicum	6477	19032	9937.5	1792	11524
Physcomitrella patens	6342	9352	6382	4526	7553
Pistacia vera	7203	18182	9936	1608	11779
Populus alba	5483	18030	8802	2433	10585
Populus euphratica	5589	17855	7714.5	2011	10629
Populus trichocarpa	5326.5	17811	7861	1719	10426.5
Prosopis alba	6505	19094	10334	1687	11563
Prunus avium	3529.5	11459	5380	1668	7764
Prunus dulcis	5907.5	17120	9394	2455	10406
Prunus mume	5413.5	14743	9028.5	2822	10434.5
Prunus persica	6358.5	19947	10526.5	1791	11991
Punica granatum	5236	14185	6716	2202	8897
Pyrus ussuriensis x Pyrus communis	9383	20202	11252	3125	13719
Pyrus x bretschneideri	6054	20345	9672	3153	12391
Quercus lobata	9715	12051	10222	8283	10699
Quercus suber	9422.5	13013	10177	7295	10869.5
Raphanus sativus	5113.5	5970	5324	4572	5518.5
Raphidocelis subcapitata	3589	3589	3589	3589	3589
Rhamnella rubrinervis	5094	14254	5764	1352	10391
Rhododendron simsii	7772.5	18304	11018.5	1739	12046.5
Rhododendron williamsianum	3131.5	13332	5436.5	2177	11835.5
Ricinus communis	5819.5	11340	6869	2729	8148
Rosa chinensis	8738	19083	11606.5	2639	12921
Salix brachista	5148	10911	5540	1580	7533
Salvia splendens	7022	17173	7905	1492	11108
Selaginella moellendorffii	5578	10452	7316	2918	7556
Sesamum indicum	5780	15223	9087.5	2892	9790
Setaria italica	6834.5	22265	12392	2472	13396.5
Setaria viridis	7231	21767	12265.5	1880	13386
Sinapis alba	4710	17637	5982	1948	9963
Solanum chilense	5172	14303	9438.5	1736	12021
Solanum lycopersicum	8539	11641	8967	6655	9817.5
Solanum pennellii	6155	18780	9175	1735	11229
Solanum tuberosum	5062	15259	7022	1730	9150
Sorghum bicolor	8288	18589	11945	2388	12432
Spatholobus suberectus	5092.5	17929	7024	1592	10242.5
Spinacia oleracea	7550.5	19683	10562	2060	12415
Striga asiatica	7628	18469	11402	1757	11971
Tarenaya hassleriana	4639	9713	5741	1605	6942
Telopea speciosissima	7730	18437	10862	1722	12149
Tetrabaena socialis	3285	8259	5367	1964	6417
Theobroma cacao	7004	17845	10732	2555	11625
Trema orientale	5139.5	14449	6311	2183	10910.5
Trifolium pratense	6286	20017	10366	1848	11845
Trifolium subterraneum	4777	11054	5331	1485	7388
Tripterygium wilfordii	5721.5	20297	9828	1401	11799
Vigna angularis	3507	14882	5295	1273	8090
Vigna radiata	3123.5	12477	5221	1292	7046.5
Vigna unguiculata	5327.5	16144	8634	1685	9940.5
Vitis vinifera	5709	20922	10322	1967	12549
Volvox africanus	7152.5	8848	7814.5	6314	7853
Volvox carteri	5372.5	8180	6442.5	3268	6883
Zea mays	7447	20616	9642	1771	12807
Zingiber officinale	9426	13790	10403	6813	11172
Ziziphus jujuba	4823	8851	5811	2076	6909
Zostera marina	5386	15022	6205.5	1205	9321

## Sheet: Nonautonomous(BARE-2)
Nonautonomous(BARE-2)
Species name	First Quartile	Maximum	Median	Minimum	Third Quartile
Abrus precatorius	4685	4685	4685	4685	4685
Acer yangbiense	5079	14863	9440	4207	9677
Actinidia rufa	4369	5315	4430	3961	4904
Aegilops tauschii	4723	13825	8444	3639	9151
Amborella trichopoda	5725	5725	5725	5725	5725
Ananas comosus	4380	9923	7151.5	4380	9923
Apium graveolens	8358	14604	9284	3593	12163.5
Aquilegia coerulea	8465	8632	8487	8465	8553
Arachis duranensis	4170.5	5526	4193	4148	4859.5
Arachis ipaensis	4187	5203	4553	3547	5091
Asparagus officinalis	4461	6167	4964	3742	5210.5
Benincasa hispida	4310	6340	4718	3334	5381
Beta vulgaris	4159	7853	4435	3935	6170
Brassica cretica	4498	4498	4498	4498	4498
Brassica napus	4266	5758	5429	4036	5730.5
Brassica oleracea	4099	4099	4099	4099	4099
Brassica rapa	5452	6065	5523	5391	5741
Buddleja alternifolia	4273.5	4451	4381	4221	4448
Cajanus cajan	3957	4669	4313	3957	4669
Camelina sativa	6946	6946	6946	6946	6946
Camellia sinensis	5182	6201	5346.5	4678	5672
Cannabis sativa	4070	4363	4216.5	4070	4363
Capsella rubella	8080	8080	8080	8080	8080
Capsicum annuum	4212	4426	4358	3979	4421
Capsicum baccatum	4230	5053	4397	3807	4910
Capsicum chinense	4204	5110	4370.5	3733	4977
Carex littledalei	4555	4834	4694.5	4555	4834
Carpinus fangiana	4218	4218	4218	4218	4218
Carya illinoinensis	4236.5	8735	4743	3987	6867.5
Cephalotus follicularis	4436	13285	5034.5	3896	7983
Chenopodium quinoa	4193	4378	4279	3937	4364.5
Cicer arietinum	3767	5033	4225	3618	4783.5
Cinnamomum micranthum f. kanehirae	4235.5	5377	4411	4060	4894
Citrus clementina	4240.5	6462	4736	4011	5732
Citrus sinensis	5002	5002	5002	5002	5002
Coffea arabica	3779	3904	3803	3772	3844
Coffea canephora	3675	3882	3778.5	3675	3882
Coffea eugenioides	3803	3959	3833.5	3775	3867
Corchorus olitorius	6111.5	9680	8664	3559	9172
Corymbia citriodora subsp. variegata	3939	3939	3939	3939	3939
Cucumis melo	4483	4786	4782	4184	4784
Cucumis sativus	4800	5093	4946.5	4800	5093
Cucurbita maxima	4105.5	5342	4157	4054	4749.5
Cucurbita moschata	3524	6321	3740	3443	4795
Cuscuta australis	4121.5	4298	4148	3977	4219
Cuscuta campestris	4041	4366	4129.5	3841	4197
Cynara cardunculus var. scolymus	4389.5	4876	4775	4004	4825.5
Daucus carota	4440	4472	4456	4440	4472
Dendrobium catenatum	4073	6361	4647	3499	5504
Dioscorea cayenensis subsp. rotundata	4435	5106	4770.5	4435	5106
Durio zibethinus	4157	5010	4185	4129	4597.5
Elaeis guineensis	4983	5174	5078.5	4983	5174
Eleusine coracana subsp. coracana	10079	10079	10079	10079	10079
Eragrostis curvula	4756.5	5278	4848	4720	5113
Erigeron canadensis	7709	14623	11646	3772	13134.5
Erythranthe guttata	6576.5	9004	8924.5	4258	8979
Eucalyptus grandis	4377	10232	7597	3887	9605
Eutrema salsugineum	4387	4387	4387	4387	4387
Fragaria vesca	4629	4629	4629	4629	4629
Glycine max	4118.5	8008	4182	4035	5970
Glycine soja	4182	4903	4872	4084	4903
Gossypium arboreum	3861	4273	3977	3615	4075.5
Gossypium australe	4203	4304	4219	4203	4304
Gossypium darwinii	3973	4391	4100.5	3627	4232
Gossypium hirsutum	3952	4977	4174.5	3756	4626.5
Gossypium raimondii	4084	4153	4085	4084	4153
Handroanthus impetiginosus	4152	5038	4387	4082	4795
Hevea brasiliensis	4112	5217	4599	3914	4800
Hibiscus syriacus	4002	4844	4281	3510	4526
Hordeum vulgare subsp. vulgare	4716	11857	7306	4155	11366
Ipomoea nil	3864	4903	3967	3731	4324
Ipomoea triloba	4114	5277	4307	3828	4688
Jatropha curcas	4738	5296	5017	4738	5296
Juglans microcarpa x Juglans regia	4520	4625	4584	4456	4604.5
Juglans regia	4567	4567	4567	4567	4567
Lactuca saligna	10285	11417	10851	10285	11417
Lactuca sativa	5126.5	13307	5317	4715	12685.5
Macleaya cordata	4741	4741	4741	4741	4741
Malus baccata	4329	4676	4469	4241	4593
Malus domestica	4299	4779	4488.5	4163	4617
Mangifera indica	7011	7026	7018.5	7011	7026
Manihot esculenta	4079	4457	4155.5	3858	4250
Marchantia paleacea	5191	5224	5207.5	5191	5224
Marchantia polymorpha	7070	7070	7070	7070	7070
Mikania micrantha	4045	4821	4121	3970	4821
Momordica charantia	4495	4681	4588	4495	4681
Morella rubra	4528	4922	4725	4528	4922
Nelumbo nucifera	4586	5460	4905	3992	5323
Nicotiana attenuata	3988	4519	4254.5	3778	4519
Nicotiana sylvestris	3987	5065	4232	3981	4833
Nicotiana tabacum	4376	4835	4558.5	4233	4808.5
Nicotiana tomentosiformis	4204.5	5156	4284	4144	4729.5
Nymphaea colorata	4356.5	6367	4735.5	4021	5282
Nyssa sinensis	4866	5222	4980	4845	5011
Olea europaea	4002	4457	4198	3553	4424
Oryza sativa Japonica	4438	4730	4583	4437	4728.5
Panicum hallii	4538	4940	4739	4538	4940
Panicum virgatum	4467	5526	5144	3947	5323
Papaver somniferum	4366	10571	5723.5	3895	6858.5
Perilla frutescens var. frutescens	4145	5308	4677	3481	5175
Phaseolus vulgaris	4251	4335	4280	4177	4335
Phoenix dactylifera	4996.5	10365	10353	3748	10357.5
Phtheirospermum japonicum	3955	4952	4453.5	3955	4952
Pistacia vera	4376	6325	4868	3498	5443
Prosopis alba	4887	5269	5128	4887	5138
Prunus avium	4361	4361	4361	4361	4361
Prunus dulcis	4339.5	6517	4464	4215	5490.5
Prunus mume	4161	4161	4161	4161	4161
Prunus persica	4281.5	6671	5412	4216	6574
Punica granatum	4246	4987	4390	4102	4688.5
Pyrus ussuriensis x Pyrus communis	4572	9295	4700	3925	9202
Pyrus x bretschneideri	4567	5000	4957	4334	5000
Quercus lobata	4505	4672	4569	4373	4599.5
Quercus suber	4482	4742	4543.5	4442	4590
Rhamnella rubrinervis	4600.5	5072	4887	4314	4979.5
Rhododendron simsii	4606	4714	4656.5	4510	4687
Rhododendron williamsianum	3623	4763	4193	3623	4763
Ricinus communis	4535	4921	4877	4193	4899
Rosa chinensis	4334.5	4523	4392.5	4238	4461.5
Salix brachista	4105.5	5149	4355	3146	4876
Salvia splendens	4883.5	5194	5004	4702	5036.5
Sesamum indicum	4630	4630	4630	4630	4630
Sinapis alba	4982	4982	4982	4982	4982
Solanum lycopersicum	5000	5000	5000	5000	5000
Solanum pennellii	4401	4401	4401	4401	4401
Solanum tuberosum	4006	4456	4455	3557	4455.5
Sorghum bicolor	5042	5071	5056.5	5042	5071
Spatholobus suberectus	4346	5452	5110.5	3803	5122
Striga asiatica	6368.5	9097	8759	3513	8937
Tarenaya hassleriana	5039	5039	5039	5039	5039
Telopea speciosissima	5082	5691	5495	4357	5608
Theobroma cacao	4264	4264	4264	4264	4264
Trifolium pratense	4292	4595	4563.5	4189	4595
Trifolium subterraneum	9266	9266	9266	9266	9266
Tripterygium wilfordii	4073.5	4295	4124	4052	4236.5
Vigna angularis	3770	3964	3874	3666	3919
Vigna radiata	4015.5	4255	4170	3885	4252
Vigna unguiculata	3572	4707	4030	3547	4433
Vitis vinifera	4154	4439	4227	4068	4282.5
Zea mays	4902.5	4992	4963	4842	4977.5
Zingiber officinale	4268	9989	4340	3524	6687
Ziziphus jujuba	4767	5638	5202.5	4767	5638

## Sheet: Nonautonomous(TR-GAG)
Nonautonomous(TR-GAG)
Species name	First Quartile	Maximum	Median	Minimum	Third Quartile
Abrus precatorius	2034	2034	2034	2034	2034
Acer yangbiense	3107	13087	7012.5	1655	7614
Actinidia rufa	1760.5	5596	3131	1474	3786
Aegilops tauschii	7338	13406	9682	4757	10157
Amborella trichopoda	1709	1709	1709	1709	1709
Apium graveolens	1781	6523	2755	1555	3713
Aquilegia coerulea	3689	5213	4451	3689	5213
Arabidopsis lyrata	3020	5874	3405.5	2573	4368
Arabidopsis thaliana	3154	3154	3154	3154	3154
Arachis ipaensis	5347.5	10378	8695.5	2259	9666.5
Asparagus officinalis	5022.5	12986	7709	1598	8420
Benincasa hispida	7319.5	9977	7454	7185	8715.5
Beta vulgaris	1751	2633	1992	1664	2633
Brassica cretica	1210	1210	1210	1210	1210
Brassica napus	3475	7533	5417	2444	6360
Brassica oleracea	3384.5	7574	5370.5	3257	7401.5
Brassica rapa	3077.5	6242	4589	2536	5915
Buddleja alternifolia	1556	8697	1948.5	1419	5510
Cajanus cajan	1635	1764	1699.5	1635	1764
Camelina sativa	2198	4970	2709.5	2072	3865
Camellia sinensis	3532.5	11427	5403	1916	6882
Cannabis sativa	5950	10132	7324	4899	10053
Capsicum annuum	3081.5	5597	4336	2414	4998.5
Capsicum baccatum	3599	12660	6148	2736	9866.5
Capsicum chinense	2513	9656	3246	1638	5545
Carpinus fangiana	3643.5	9615	4808	2479	7211.5
Carya illinoinensis	2233	2250	2237	2231	2241
Cephalotus follicularis	3706	12151	4831	1465	7407
Ceratodon purpureus	5810	5810	5810	5810	5810
Chenopodium quinoa	5384.5	12158	8993	2818	10948.5
Chondrus crispus	9265	9265	9265	9265	9265
Cinnamomum micranthum f. kanehirae	3947	5417	4123.5	2918	4665
Citrus clementina	2403	6927	6297	1994	6820.5
Citrus sinensis	2104	6760	2243	1997	6357
Citrus unshiu	4355.5	6764	6150	2561	6457
Coffea arabica	3791.5	4205	3989	3608	4200.5
Coffea canephora	2618	5637	4127.5	2618	5637
Coffea eugenioides	3809	8868	4015	1678	5925
Corchorus olitorius	1674	4123	2898.5	1674	4123
Cucurbita moschata	3529	3529	3529	3529	3529
Cucurbita pepo	2873	6359	4616	2873	6359
Cuscuta australis	1971	2211	1994.5	1866	2211
Cuscuta campestris	1800.5	4674	2112.5	1356	3159
Daucus carota	2613	9103	4566	2319	5808
Dendrobium catenatum	3423.5	5079	4203	2644	4641
Dioscorea cayenensis subsp. rotundata	6645	7502	7073.5	6645	7502
Dorcoceras hygrometricum	2176	2176	2176	2176	2176
Durio zibethinus	9143	9636	9577	9143	9636
Eleusine coracana subsp. coracana	7573	10667	9901	7573	9901
Eragrostis curvula	6568	9897	7451	4902	9287.5
Erigeron canadensis	3165	11873	7601	1599	10977.5
Erythranthe guttata	1702.5	3560	1859	1503	3119
Eucalyptus grandis	3576	6055	5258	3267	5841
Eutrema salsugineum	3698	3698	3698	3698	3698
Glycine max	9638.5	16669	14677	5878	16314
Glycine soja	6780	15209	7684	5373	14234
Gossypium arboreum	1821.5	1833	1827.5	1821	1833
Gossypium australe	7581	11788	8150	6913	9289
Gossypium darwinii	3133	3785	3151.5	3089	3502
Gossypium hirsutum	3065	3728	3159.5	2752	3567.5
Gossypium raimondii	3308	12557	3367	3162	10780.5
Handroanthus impetiginosus	2657	4417	2975.5	2532	3793
Hevea brasiliensis	1690.5	2022	1801.5	1690	1948
Hibiscus syriacus	4452	15808	5703	1786	9786
Hordeum vulgare subsp. vulgare	9497	11484	10449	7631	10779
Ipomoea nil	2668	11511	7952	1399	8253
Ipomoea triloba	3197	6754	3319	1574	6589
Juglans microcarpa x Juglans regia	2288	2295	2291	2288	2295
Juglans regia	2257	6864	2291	2223	4577.5
Lactuca saligna	7085	8881	7682	5795	7947
Lactuca sativa	6057	10157	7738	3514	7799.5
Lupinus angustifolius	1957	1957	1957	1957	1957
Macadamia integrifolia	2822	4016	3532	1754	3740
Macleaya cordata	2473	2749	2543.5	2202	2721.5
Malus baccata	3938	10807	8768	3724	9211
Malus domestica	9327.5	11461	9864.5	8474	10246.5
Manihot esculenta	7494	9501	7708	6104	8564
Medicago truncatula	1361	2985	2903	1358	2960.5
Mikania micrantha	2074	3163	2269.5	1579	3080
Morella rubra	2397.5	2429	2425	2370	2427
Musa acuminata	2846	3381	3113.5	2846	3381
Musa balbisiana	7309	8529	7712.5	6967	7988
Nelumbo nucifera	2240	2240	2240	2240	2240
Nicotiana attenuata	3309.5	14625	5018	1769	7953.5
Nicotiana sylvestris	3410	16140	4329.5	2195	11640
Nicotiana tabacum	3761	22619	7366	1379	12154
Nicotiana tomentosiformis	1507.5	9944	4392.5	1506	6526
Nyssa sinensis	5269	10021	7541	4602	7630.5
Olea europaea	2863	6301	4582	2863	6301
Oryza sativa Japonica	6275.5	11095	8779	3772	9937
Panicum hallii	2055	2055	2055	2055	2055
Panicum virgatum	4887	10840	6399	1742	8470
Papaver somniferum	7908.5	13831	8689	4438	10306
Perilla frutescens var. frutescens	1854	6242	3221	1282	3728
Phaseolus vulgaris	4892	6241	5566.5	4892	6241
Phoenix dactylifera	10466	11511	11174	10064	11329
Phtheirospermum japonicum	4359	5950	4906	3812	5428
Pistacia vera	1970	6938	2122	1802	6300.5
Populus alba	8516.5	9691	8909	8124	9300
Populus trichocarpa	8927	8927	8927	8927	8927
Prosopis alba	1991	2270	2126.5	1991	2164
Punica granatum	2222	2237	2229.5	2222	2237
Pyrus ussuriensis x Pyrus communis	6373.5	10544	8979	2065	9847
Pyrus x bretschneideri	2243	8972	5607.5	2243	8972
Quercus lobata	7205	8964	7279	6794	8016
Quercus suber	2017	9458	7306	1560	7387.5
Raphanus sativus	3298	3330	3314	3298	3330
Rhododendron simsii	2334.5	5899	2339.5	1896	4093
Rhododendron williamsianum	5016	5016	5016	5016	5016
Rosa chinensis	2922	14054	3331.5	1972	8692
Salix brachista	1665	3173	1931.5	1408	2953
Salvia splendens	2198	4110	2902	1854	4044
Selaginella moellendorffii	5524	5807	5726.5	5524	5784
Sesamum indicum	3074	5188	3192	2956	4190
Setaria viridis	5217	5217	5217	5217	5217
Solanum lycopersicum	6653	13542	7242	6064	10392
Solanum pennellii	2465	2549	2470	2465	2549
Solanum tuberosum	2472	9428	2866	2234	5310
Sorghum bicolor	1952	1966	1959	1952	1966
Spatholobus suberectus	1563	4610	3086.5	1563	4610
Spinacia oleracea	3822	7581	5962.5	1748	6805
Striga asiatica	2734	2734	2734	2734	2734
Tarenaya hassleriana	4198	4198	4198	4198	4198
Telopea speciosissima	3527	5922	4127	2903	5922
Tetrabaena socialis	2972	2972	2972	2972	2972
Trifolium pratense	2859	3615	3229	2641	3294
Trifolium subterraneum	2534.5	7281	3169	1900	5225
Tripterygium wilfordii	2196.5	9755	2209	1441	5613
Vigna angularis	2273	10138	3434	1605	5719.5
Vigna radiata	2150.5	5504	2710.5	1613	5178
Vigna unguiculata	2665	5677	3547	1478	4425
Vitis vinifera	1917.5	5085	2530	1305	3807.5
Zea mays	7327	7630	7431.5	7230	7510
Zingiber officinale	3979	10530	4115	2030	6626
Zostera marina	6731.5	9517	7136.5	6555	8746.5

## Sheet: Nonautonomous(Unknown)
Nonautonomous(Unknown)
Species name	First Quartile	Maximum	Median	Minimum	Third Quartile
Abrus precatorius	3516.5	10496	5636.5	1912	8324
Acer yangbiense	6019.5	8274	6457	4904	6943.5
Actinidia rufa	2578	11083	5857	1226	6147
Aegilops tauschii	6991	9194	7272	5665	7875.5
Ananas comosus	2073	4728	3080.5	2056	4107
Apium graveolens	5979	15368	9018	1228	10261
Aquilegia coerulea	2438	9839	2768.5	1560	7254
Arabidopsis lyrata	5111.5	6522	6127	4034	6363
Arabidopsis thaliana	8324	8324	8324	8324	8324
Arachis duranensis	4123	13728	7425	1457	7992
Arachis ipaensis	7235	10341	7852	5387	8478
Asparagus officinalis	3423	10586	4873	1556	6688
Astrephomene gubernaculifera	1370.5	4851	1420	1369	3159.5
Benincasa hispida	4446.5	7931	5480.5	2234	6163.5
Beta vulgaris	2269	2730	2368	2174	2730
Brachypodium distachyon	4792.5	7891	6286.5	4590	7734.5
Brassica cretica	1615.5	3883	1886	1328	3582.5
Brassica napus	3423	9833	4683	1605	6308
Brassica oleracea	2657	6461	3637.5	2335	4517
Brassica rapa	4811	11284	5824	2246	8051
Buddleja alternifolia	5129	7364	6024	3845	6199
Cajanus cajan	2844	5274	5054	1610	5115.5
Camelina sativa	2889	7398	4696	1819	7331
Camellia sinensis	2572	8751	4158	1376	5056
Cannabis sativa	9776.5	10706	10051	9216	10157
Capsicum annuum	1426	7987	3514	1185	4137.5
Capsicum baccatum	2854	9150	3649	1185	5494.5
Capsicum chinense	2480	6917	3542	1198	4423
Carex littledalei	5182	5809	5362.5	4576	5655
Carpinus fangiana	4529	7053	5720	4032	5861
Carya illinoinensis	5082	9771	7931	1572	8890.5
Cephalotus follicularis	3126.5	12234	5226	1308	6800
Ceratodon purpureus	3820	3850	3835	3820	3850
Chara braunii	1859	6105	4535	1855	5715
Chenopodium quinoa	6084	11486	7119.5	3002	8245
Chlamydomonas reinhardtii	1935	1935	1935	1935	1935
Chondrus crispus	5688	8809	6203.5	5529	8362
Cicer arietinum	1577	4210	2314	1420	2656.5
Cinnamomum micranthum f. kanehirae	6900	8929	7765	5520	8029.5
Citrus clementina	1934	9271	2422.5	1732	5212.5
Citrus unshiu	2062	2062	2062	2062	2062
Coffea arabica	3829	13301	7109.5	1417	7984
Coffea canephora	3465	10810	3831	2322	6679
Coffea eugenioides	5452	10479	7064.5	2054	7720
Corchorus capsularis	5571	6303	5806.5	5466	6074
Corchorus olitorius	1703	11781	5845	1322	8365
Corymbia citriodora subsp. variegata	3615	6026	4709	2394	5336
Cucumis sativus	1302	1415	1306	1276	1350
Cucurbita maxima	1228	1409	1253	1219	1318
Cucurbita moschata	1279	1301	1286	1263	1294
Cucurbita pepo	1272	1292	1285	1272	1286
Cuscuta australis	1320	3077	1394	1168	2070
Cuscuta campestris	1320	2063	1403	1192	1618.5
Cynara cardunculus var. scolymus	2777.5	8870	4400.5	1657	5986
Daucus carota	4843.5	6406	5966	4051	6106
Dendrobium catenatum	4155.5	5608	4353	3485	5080
Dioscorea cayenensis subsp. rotundata	6789.5	7648	7097	6353	7236.5
Dorcoceras hygrometricum	2972.5	7014	3285	1888	4698
Dunaliella salina	1839	1882	1860.5	1839	1882
Durio zibethinus	1822.5	1915	1854	1760	1879.5
Eleusine coracana subsp. coracana	3741	8266	4008	1291	5818
Ensete ventricosum	4988	5344	5166	4988	5344
Eragrostis curvula	5854	7224	5984.5	5136	6425
Erigeron canadensis	3093	12583	3957	1628	10278.5
Erythranthe guttata	1969	10669	4941	1347	5449
Eucalyptus grandis	4753	6265	5762	2906	6048
Eutrema salsugineum	4800	8223	7004.5	1783	7206
Fragaria vesca	5214.5	6601	5745	4342	6400
Glycine max	3833	7206	4019.5	1830	5183
Glycine soja	3792.5	5882	3945.5	2031	5005
Gossypium arboreum	7812.5	9078	8474	6958	8474
Gossypium australe	6196.5	8421	6682	4859	7094.5
Gossypium darwinii	6920	12390	8327	3312	9950
Gossypium hirsutum	6017	10295	7897	3291	8022
Gossypium raimondii	3469	4523	3926.5	2731	4315
Herrania umbratica	6198	6263	6213.5	6198	6248
Hevea brasiliensis	3574	11284	5762	1493	8035
Hibiscus syriacus	6666.5	11297	8116.5	3746	8639.5
Hordeum vulgare subsp. vulgare	6816	14432	6985	2369	9900
Ipomoea nil	4000	14312	6487	1214	8190
Ipomoea triloba	5460	11112	6536	1903	8526
Juglans microcarpa x Juglans regia	7054	8277	7202	6357	7548.5
Juglans regia	5060	8185	7153	2279	7433
Lactuca saligna	7599.5	7933	7690	7401	7733
Lactuca sativa	7553	7991	7589	7286	7732.5
Lupinus angustifolius	1277	1962	1288	1266	1625
Macadamia integrifolia	2429.5	3780	2781	1555	3619.5
Macleaya cordata	1642	7306	2743	1539	6461.5
Malus baccata	4438	11445	6235	1623	9223
Malus domestica	6380	12070	9032	1505	9684
Mangifera indica	1399	2441	1433	1398	2116
Manihot esculenta	1693	6919	5059	1298	5808
Marchantia paleacea	1750	2705	2227.5	1750	2705
Marchantia polymorpha	1750	6923	4336.5	1750	6923
Medicago truncatula	4636	12001	6617	1618	7817.5
Mikania micrantha	3027	11273	5758.5	1314	6356
Morella rubra	1819.5	1852	1826.5	1813	1839.5
Morus notabilis	1939	2055	1942	1821	2038
Musa balbisiana	4449	4722	4561	4313	4571
Nelumbo nucifera	4070.5	7970	4674	3467	6322
Nicotiana attenuata	3531.5	14102	5777	1302	8745
Nicotiana sylvestris	3504	11767	5821	1398	9842
Nicotiana tabacum	3694	10928	5920	1560	8501
Nicotiana tomentosiformis	5690	10871	7562	3677	8996
Nymphaea colorata	2031	2040	2034	2031	2040
Nyssa sinensis	8579	11836	9973	6450	10197
Olea europaea	3289	4250	3403.5	2517	3903
Oryza brachyantha	1539	1841	1690	1539	1841
Oryza sativa Japonica	4147	13867	10143.5	1757	10935
Panicum hallii	2537	14447	2765	1842	9055
Panicum virgatum	4041	14388	5457	1217	9457
Papaver somniferum	6392	11533	7127	3294	8468
Parasponia andersonii	3168	6524	4846	3168	6524
Perilla frutescens var. frutescens	4781.5	11507	6254	1460	8657
Phalaenopsis equestris	2541	2541	2541	2541	2541
Phaseolus vulgaris	4613.5	6527	5286.5	4365	6119
Phoenix dactylifera	6750	11575	7182.5	1731	10849
Phtheirospermum japonicum	4839.5	8378	5759	2758	6325.5
Physcomitrella patens	5915.5	5971	5925.5	5912	5948
Pistacia vera	4491	8983	6447	1186	7029
Populus alba	2053	11099	3417.5	1854	8803.5
Populus euphratica	3631	4042	3788	3491	3853
Populus trichocarpa	3763.5	4433	3872	3583	4132
Prosopis alba	5868	14707	7090	1972	10757
Prunus avium	1775	2313	2044	1775	2313
Prunus dulcis	2186	10494	4241.5	2071	6186.5
Prunus mume	2001.5	4898	3240	1307	4068.5
Prunus persica	1816	5222	3285	1416	3302
Punica granatum	3348	18422	15421	1467	16268
Pycnococcus provasolii	1356	1438	1367	1314	1438
Pyrus ussuriensis x Pyrus communis	8659	10360	8946	7647	9359
Pyrus x bretschneideri	4513	14805	6048	1331	8904.5
Quercus lobata	3806	9469	5166	1157	6095
Quercus suber	5297	7848	5478	3904	6335
Raphanus sativus	2706	6189	3936	2700	5674.5
Rhamnella rubrinervis	2080	5296	3688	2080	5296
Rhododendron simsii	2277	12368	7147.5	1433	9622.5
Ricinus communis	4864.5	8504	6044.5	2658	6339.5
Rosa chinensis	6456	11818	8151.5	2822	9071
Salix brachista	1229	2487	1316.5	1200	2357.5
Salvia splendens	2319	9306	2617	1462	5122
Selaginella moellendorffii	7278	8243	7480.5	7097	7699
Sesamum indicum	2008	2576	2266	1779	2576
Setaria italica	2813	6295	3094.5	1576	4422
Setaria viridis	3961	8756	5245.5	1576	6335
Sinapis alba	3654	4741	3905.5	2980	4741
Solanum chilense	3926	4151	4038.5	3926	4151
Solanum lycopersicum	3350	8574	3941	1559	7517
Solanum pennellii	3405	8628	3956.5	1518	6010.5
Solanum tuberosum	1614.5	6015	1865	1257	4025.5
Sorghum bicolor	2619	15392	6765.5	2151	7889
Spatholobus suberectus	3613	3938	3752	3461	3824
Spinacia oleracea	7825	15265	10307	3301	10850
Striga asiatica	5576	12259	7455	1503	10123
Tarenaya hassleriana	2613	5213	3874.5	1998	4867
Telopea speciosissima	3282.5	14823	6618	1378	9224.5
Theobroma cacao	2281	2281	2281	2281	2281
Trema orientale	2005	2356	2313	1673	2356
Trifolium pratense	2500	14352	5638.5	1278	7994
Trifolium subterraneum	2552.5	4376	3246	1518	3315.5
Tripterygium wilfordii	5754.5	10155	6712	3210	8322.5
Vigna angularis	1904.5	7272	1970	1404	4119.5
Vigna radiata	2000.5	6319	2658	1470	5275.5
Vigna unguiculata	5157	8161	6951	3034	7023
Vitis vinifera	7089	10146	8021	5396	8388
Volvox africanus	2414	3988	2428	2400	3208
Zea mays	9401	9710	9462	9316	9594
Zingiber officinale	5339	10178	6992	2570	7289
Ziziphus jujuba	2670	6856	3621	1719	5238.5
Zostera marina	4320.5	9110	5529	4051	7202.5
