# Supplementary material for: PlantLTRdb: An interactive database for 195 plant species LTR-retrotransposons
Source: Front Plant Sci. 2023 Mar 6;14:1134627. doi: 10.3389/fpls.2023.1134627 (PMC10025401; doi:10.3389/fpls.2023.1134627)
Supplement: Supplementary file 9 [file Table_5.xlsx]

## Sheet: Sheet1
Table S5: Species name, Total No. of identified LTR-RT, LTR-RT inside genes, LTR-RT inside pseudo-genes, No. of genes near LTR-RT (1bp-1kbp) and, No. of genes near LTR-RT (1kbp-10kbp) for all species studied
Species name	Total No. of identified LTR-RT	LTR-RT inside genes	LTR-RT inside pseudo-genes	No. of genes near LTR-RT (1bp-1kbp)	No. of genes near LTR-RT (1kbp-10kbp)
Abrus precatorius	653	123	20	90	559
Acer yangbiense	5029	226	-	370	1623
Actinidia rufa	1642	69	-	311	1682
Aegilops tauschii	33245	634	241	861	6219
Amborella trichopoda	44	13	-	-	7
Ananas comosus	476	71	-	35	190
Apium graveolens	33201	25	-	26	181
Apostasia shenzhenica	124	25	-	20	125
Aquilegia coerulea	2487	92	-	455	2045
Arabidopsis lyrata	1205	96	22	499	2478
Arabidopsis thaliana	165	4	3	148	697
Arachis duranensis	1611	79	8	195	1051
Arachis ipaensis	3562	117	17	298	1641
Asparagus officinalis	3727	648	42	359	1350
Astrephomene gubernaculifera	32	-	-	6	30
Benincasa hispida	863	217	2	53	272
Beta vulgaris	1634	299	14	233	809
Brachypodium distachyon	421	32	9	89	484
Brassica cretica	430	9	-	235	1201
Brassica napus	2626	143	103	1012	4269
Brassica oleracea	834	68	44	303	1229
Brassica rapa	1954	320	14	615	2429
Buddleja alternifolia	6240	467	-	730	2524
Cajanus cajan	920	108	10	110	589
Camelina sativa	1326	90	68	545	2428
Camellia sinensis	4402	436	98	315	1511
Cannabis sativa	6376	288	31	668	3641
Capsella rubella	200	24	3	96	500
Capsicum annuum	2586	338	83	169	708
Capsicum baccatum	4630	204	-	250	943
Capsicum chinense	2842	185	-	215	831
Carex littledalei	1648	137	-	234	1247
Carica papaya	67	29	2	5	55
Carpinus fangiana	655	67	-	76	348
Carya illinoinensis	3828	449	156	581	2639
Cephalotus follicularis	6132	396	-	426	2623
Ceratodon purpureus	650	5	-	111	667
Chara braunii	23	9	-	5	60
Chenopodium quinoa	9635	603	107	1151	37
Chlamydomonas eustigma	13	-	-	8	11
Chlamydomonas reinhardtii	16	1	-	8	10
Chlorella variabilis	2	-	-	-	10
Chondrus crispus	69	-	-	155	1138
Cicer arietinum	583	141	7	61	423
Cinnamomum micranthum f. kanehirae	2425	641	23	154	624
Citrus clementina	1208	104	76	211	1225
Citrus sinensis	377	49	12	74	348
Citrus unshiu	425	34	-	147	872
Coccomyxa subellipsoidea	4	-	-	1	7
Coffea arabica	5225	266	89	474	2354
Coffea canephora	953	48	-	108	497
Coffea eugenioides	2951	173	48	275	1302
Corchorus capsularis	864	61	1	134	736
Corchorus olitorius	859	30	-	216	989
Corymbia citriodora subsp. variegata	813	29	-	81	492
Cucumis melo	223	89	-	21	101
Cucumis sativus	314	124	3	36	280
Cucurbita maxima	344	102	10	98	435
Cucurbita moschata	451	75	6	99	458
Cucurbita pepo	236	48	2	60	349
Cuscuta australis	1883	256	-	256	1421
Cuscuta campestris	1007	217	-	164	790
Cynara cardunculus var. scolymus	559	132	5	19	177
Daucus carota	813	91	11	180	879
Dendrobium catenatum	1121	317	4	104	422
Dichanthelium oligosanthes	140	17	-	22	82
Dioscorea cayenensis subsp. rotundata	1484	112	40	211	1001
Dorcoceras hygrometricum	984	114	-	109	645
Dunaliella salina	28	1	-	2	9
Durio zibethinus	572	149	64	107	483
Elaeis guineensis	123	62	2	10	21
Eleusine coracana subsp. coracana	4153	59	-	314	1778
Ensete ventricosum	92	3	-	9	75
Eragrostis curvula	3239	256	8	859	3637
Erigeron canadensis	1843	95	27	220	1326
Erythranthe guttata	1386	72	12	271	1327
Eucalyptus grandis	2617	241	131	368	1843
Eutrema salsugineum	1492	52	31	445	2261
Fragaria vesca	291	16	5	116	445
Glycine max	3339	236	90	297	1729
Glycine soja	3958	307	115	335	2026
Gonium pectorale	3	-	-	1	4
Gossypium arboreum	2953	195	58	224	1187
Gossypium australe	12713	265	-	551	2997
Gossypium darwinii	10457	903	-	1061	5603
Gossypium hirsutum	5041	506	163	757	3367
Gossypium raimondii	1445	143	53	221	1089
Handroanthus impetiginosus	560	38	-	64	305
Herrania umbratica	30	5	1	4	33
Hevea brasiliensis	1622	338	48	104	622
Hibiscus syriacus	8980	809	856	1338	7457
Hordeum vulgare subsp. vulgare	30970	597	200	554	4659
Ipomoea nil	4930	566	52	571	3153
Ipomoea triloba	953	112	17	146	861
Jatropha curcas	86	10	-	9	73
Juglans microcarpa x Juglans regia	1519	267	52	216	994
Juglans regia	1813	308	77	208	1146
Klebsormidium nitens	2	-	-	2	8
Lactuca saligna	16262	26	-	593	4408
Lactuca sativa	11943	121	44	304	2963
Lupinus angustifolius	778	122	14	98	536
Macadamia integrifolia	905	322	22	59	426
Macleaya cordata	623	57	-	78	399
Malus baccata	1940	72	-	543	1994
Malus domestica	4511	337	136	994	3869
Mangifera indica	933	183	46	145	835
Manihot esculenta	1076	230	12	64	555
Marchantia paleacea	642	9	-	29	561
Marchantia polymorpha	43	2	-	3	56
Medicago truncatula	1170	124	15	183	1043
Micractinium conductrix	1	-	-	2	1
Mikania micrantha	15508	1158	3	948	4622
Momordica charantia	155	50	1	9	59
Morella rubra	366	27	-	90	399
Morus notabilis	702	330	12	63	485
Mucuna pruriens	72	7	-	20	137
Musa acuminata	195	38	1	13	81
Musa balbisiana	1111	184	16	94	492
Nelumbo nucifera	694	278	3	44	217
Nicotiana attenuata	6246	317	44	656	2103
Nicotiana sylvestris	1892	137	16	209	635
Nicotiana tabacum	3665	228	28	413	1228
Nicotiana tomentosiformis	1330	140	8	165	534
Nymphaea colorata	1847	998	37	77	635
Nyssa sinensis	4354	637	-	358	1501
Olea europaea	2544	303	116	299	1521
Oryza brachyantha	65	8	2	8	69
Oryza sativa Japonica	1496	111	30	263	1427
Ostreococcus lucimarinus	1	-	-	1	9
Ostreococcus tauri	2	-	-	2	11
Panicum hallii	3031	138	57	201	1452
Panicum virgatum	6054	1108	208	880	4925
Papaver somniferum	16462	290	254	1651	7864
Parasponia andersonii	372	30	-	101	523
Perilla frutescens var. frutescens	7285	91	-	407	2938
Phalaenopsis equestris	68	30	2	7	21
Phaseolus vulgaris	561	8	-	45	269
Phoenix dactylifera	6130	536	58	324	2219
Phtheirospermum japonicum	3038	25	-	157	1079
Physcomitrella patens	2709	14	10	76	1134
Pistacia vera	2247	130	101	318	1629
Populus alba	1520	198	72	297	1361
Populus euphratica	204	36	9	30	176
Populus trichocarpa	832	95	26	194	735
Prosopis alba	1944	301	65	222	1046
Prunus avium	194	19	6	46	251
Prunus dulcis	443	51	21	130	560
Prunus mume	179	20	11	46	222
Prunus persica	932	78	49	309	1152
Punica granatum	786	27	10	170	841
Pycnococcus provasolii	6	-	-	16	68
Pyrus ussuriensis x Pyrus communis	2657	316	-	477	2490
Pyrus x bretschneideri	1044	131	47	257	1091
Quercus lobata	3650	222	127	358	2241
Quercus suber	3273	154	129	293	1573
Raphanus sativus	917	113	33	368	1562
Raphidocelis subcapitata	8	-	-	4	5
Rhamnella rubrinervis	402	61	-	89	519
Rhododendron simsii	1974	281	-	297	1144
Rhododendron williamsianum	83	19	-	9	36
Ricinus communis	574	53	10	132	552
Rosa chinensis	4886	184	-	1658	7021
Salix brachista	2614	303	-	770	2574
Salvia splendens	8411	716	361	2164	9697
Selaginella moellendorffii	684	24	2	124	1203
Sesamum indicum	386	18	4	81	400
Setaria italica	1207	73	32	103	675
Setaria viridis	1222	79	18	131	787
Sinapis alba	1174	48	-	314	1597
Solanum chilense	93	8	-	5	27
Solanum lycopersicum	1438	56	7	133	725
Solanum pennellii	1930	141	58	246	1089
Solanum tuberosum	784	81	17	101	475
Sorghum bicolor	6525	395	50	393	2260
Spatholobus suberectus	1409	313	-	94	558
Spinacia oleracea	2878	184	19	256	1201
Striga asiatica	2192	208	-	416	1716
Tarenaya hassleriana	419	53	14	154	709
Telopea speciosissima	4495	1906	85	207	1444
Tetrabaena socialis	10	-	-	3	9
Theobroma cacao	239	19	7	38	201
Trema orientale	431	49	-	116	573
Trifolium pratense	3335	494	70	693	3783
Trifolium subterraneum	418	3	-	129	623
Tripterygium wilfordii	1148	198	41	305	1512
Vigna angularis	1035	352	13	92	591
Vigna radiata	571	145	8	55	339
Vigna unguiculata	1858	204	17	235	1170
Vitis vinifera	1632	515	48	179	882
Volvox africanus	274	31	-	31	277
Volvox carteri	48	3	-	18	51
Zea mays	5471	190	5115	161	1180
Zingiber officinale	25607	959	199	877	8068
Ziziphus jujuba	495	37	27	87	439
Zostera marina	543	89	-	149	724
