# Supplementary material for: PlantLTRdb: An interactive database for 195 plant species LTR-retrotransposons
Source: Front Plant Sci. 2023 Mar 6;14:1134627. doi: 10.3389/fpls.2023.1134627 (PMC10025401; doi:10.3389/fpls.2023.1134627)
Supplement: Supplementary file 10 [file Table_6.xlsx]

## Sheet: Ortho-groups 
Table S6: Ortho-Finder analysis for Oryza ativa Japonica LTR-RTs from PlantLTRdb and Manually curated library
Orthogroup	Manually curated LTR-RTs library (LTR-RT has complete GAG and Pol sequences)	Oryza ativa Japonica (PlantLTRdb)
OG0000000	Os0039_INT_RIRE3#LTR/Gypsy	NC_029256.1-12531209-12542835-Oryza_sativa_Japonica, NC_029256.1-12791740-12802327-Oryza_sativa_Japonica, NC_029256.1-12948185-12960278-Oryza_sativa_Japonica, NC_029256.1-13012813-13026821-Oryza_sativa_Japonica, NC_029256.1-13624750-13635018-Oryza_sativa_Japonica, NC_029256.1-13737084-13747295-Oryza_sativa_Japonica, NC_029256.1-14660482-14672575-Oryza_sativa_Japonica, NC_029256.1-16268965-1627842…
OG0000001	Os0030_INT_RIRE2#LTR/Gypsy	NC_029256.1-19623702-19635034-Oryza_sativa_Japonica, NC_029256.1-19790409-19801721-Oryza_sativa_Japonica, NC_029256.1-20792818-20804147-Oryza_sativa_Japonica, NC_029256.1-25653443-25664756-Oryza_sativa_Japonica, NC_029256.1-38580949-38592243-Oryza_sativa_Japonica, NC_029256.1-4469006-4483877-Oryza_sativa_Japonica, NC_029256.1-4932004-4943303-Oryza_sativa_Japonica, NC_029256.1-660815-671473-Oryza_…
OG0000002	Os0016_INT#LTR/Gypsy	NC_029256.1-11123580-11128984-Oryza_sativa_Japonica, NC_029256.1-16159379-16172135-Oryza_sativa_Japonica, NC_029256.1-19210366-19226268-Oryza_sativa_Japonica, NC_029256.1-2335749-2341144-Oryza_sativa_Japonica, NC_029256.1-23593876-23606776-Oryza_sativa_Japonica, NC_029256.1-26015183-26027996-Oryza_sativa_Japonica, NC_029256.1-30432455-30445251-Oryza_sativa_Japonica, NC_029256.1-31438707-31451545-…
OG0000003		NC_029256.1-10951368-10957828-Oryza_sativa_Japonica, NC_029256.1-12860725-12867176-Oryza_sativa_Japonica, NC_029256.1-14870331-14876816-Oryza_sativa_Japonica, NC_029256.1-15301254-15307718-Oryza_sativa_Japonica, NC_029256.1-16600426-16606826-Oryza_sativa_Japonica, NC_029256.1-17436250-17442720-Oryza_sativa_Japonica, NC_029256.1-20365147-20371611-Oryza_sativa_Japonica, NC_029256.1-20611253-2061772…
OG0000004		NC_029256.1-16307562-16311968-Oryza_sativa_Japonica, NC_029256.1-16974765-16979178-Oryza_sativa_Japonica, NC_029256.1-20470513-20475001-Oryza_sativa_Japonica, NC_029256.1-32517692-32522081-Oryza_sativa_Japonica, NC_029256.1-9956616-9961029-Oryza_sativa_Japonica, NC_029257.1-10576981-10593029-Oryza_sativa_Japonica, NC_029257.1-10581472-10585840-Oryza_sativa_Japonica, NC_029257.1-18885047-18889477-…
OG0000005	Os0032_INT#LTR/Gypsy	NC_029256.1-20219976-20231325-Oryza_sativa_Japonica, NC_029256.1-22400913-22412383-Oryza_sativa_Japonica, NC_029256.1-33416682-33426967-Oryza_sativa_Japonica, NC_029256.1-38772231-38786812-Oryza_sativa_Japonica, NC_029256.1-9351481-9369643-Oryza_sativa_Japonica, NC_029257.1-10297430-10308922-Oryza_sativa_Japonica, NC_029257.1-10599337-10610821-Oryza_sativa_Japonica, NC_029257.1-18147848-18162707-…
OG0000006		NC_029256.1-12033648-12054746-Oryza_sativa_Japonica, NC_029256.1-15864696-15876644-Oryza_sativa_Japonica, NC_029256.1-22508715-22520668-Oryza_sativa_Japonica, NC_029256.1-25804386-25816373-Oryza_sativa_Japonica, NC_029256.1-26942846-26954870-Oryza_sativa_Japonica, NC_029256.1-36545263-36557258-Oryza_sativa_Japonica, NC_029258.1-18513289-18520673-Oryza_sativa_Japonica, NC_029258.1-19639792-1965176…
OG0000007	Os0419_INT#LTR/Gypsy	NC_029256.1-10030391-10042897-Oryza_sativa_Japonica, NC_029256.1-10852347-10864933-Oryza_sativa_Japonica, NC_029256.1-14490130-14502769-Oryza_sativa_Japonica, NC_029256.1-15036628-15049416-Oryza_sativa_Japonica, NC_029256.1-15516703-15529227-Oryza_sativa_Japonica, NC_029256.1-16574111-16586637-Oryza_sativa_Japonica, NC_029256.1-17327592-17333914-Oryza_sativa_Japonica, NC_029256.1-24742852-2474843…
OG0000008	Os0282_INT#LTR/Copia	NC_029256.1-10070754-10077186-Oryza_sativa_Japonica, NC_029256.1-21048196-21054488-Oryza_sativa_Japonica, NC_029256.1-25566853-25573317-Oryza_sativa_Japonica, NC_029256.1-4638953-4645057-Oryza_sativa_Japonica, NC_029257.1-23248465-23254531-Oryza_sativa_Japonica, NC_029257.1-25243579-25250030-Oryza_sativa_Japonica, NC_029257.1-25931156-25937166-Oryza_sativa_Japonica, NC_029257.1-6860364-6866768-Or…
OG0000009	Os0632_INT#LTR/Gypsy	NC_029256.1-16196015-16199552-Oryza_sativa_Japonica, NC_029256.1-17311138-17318901-Oryza_sativa_Japonica, NC_029257.1-15115762-15127391-Oryza_sativa_Japonica, NC_029258.1-11294299-11305923-Oryza_sativa_Japonica, NC_029258.1-16345129-16357109-Oryza_sativa_Japonica, NC_029258.1-19267136-19276992-Oryza_sativa_Japonica, NC_029258.1-19718432-19726260-Oryza_sativa_Japonica, NC_029258.1-22554340-2256633…
OG0000010		NC_029256.1-9214585-9220985-Oryza_sativa_Japonica, NC_029257.1-10621619-10628092-Oryza_sativa_Japonica, NC_029257.1-16097165-16103572-Oryza_sativa_Japonica, NC_029257.1-9074559-9080966-Oryza_sativa_Japonica, NC_029258.1-11701882-11708322-Oryza_sativa_Japonica, NC_029258.1-28278914-28285385-Oryza_sativa_Japonica, NC_029258.1-32282312-32288715-Oryza_sativa_Japonica, NC_029258.1-6206390-6212799-Oryz…
OG0000011	Os0156_INT#LTR/Copia	NC_029256.1-4776234-4781945-Oryza_sativa_Japonica, NC_029256.1-9619041-9624788-Oryza_sativa_Japonica, NC_029257.1-11897046-11902756-Oryza_sativa_Japonica, NC_029257.1-15160591-15166757-Oryza_sativa_Japonica, NC_029257.1-17177624-17183389-Oryza_sativa_Japonica, NC_029257.1-32073353-32079096-Oryza_sativa_Japonica, NC_029257.1-34010132-34015814-Oryza_sativa_Japonica, NC_029257.1-3433916-3439692-Oryz…
OG0000012	Os0119_INT#LTR/Gypsy	NC_029256.1-17634697-17646379-Oryza_sativa_Japonica, NC_029257.1-30240197-30251967-Oryza_sativa_Japonica, NC_029258.1-17625813-17634544-Oryza_sativa_Japonica, NC_029259.1-12181786-12193432-Oryza_sativa_Japonica, NC_029259.1-20799867-20809948-Oryza_sativa_Japonica, NC_029259.1-2136210-2147867-Oryza_sativa_Japonica, NC_029259.1-22491559-22503070-Oryza_sativa_Japonica, NC_029259.1-32105147-32126986-…
OG0000013		NC_029256.1-13618448-13622568-Oryza_sativa_Japonica, NC_029256.1-20756397-20760493-Oryza_sativa_Japonica, NC_029256.1-36032794-36036684-Oryza_sativa_Japonica, NC_029257.1-11886205-11889893-Oryza_sativa_Japonica, NC_029257.1-19432906-19436495-Oryza_sativa_Japonica, NC_029257.1-24007795-24011752-Oryza_sativa_Japonica, NC_029257.1-30792930-30797444-Oryza_sativa_Japonica, NC_029257.1-33589841-3359352…
OG0000014	Os0008_INT#LTR/Copia, Os1031_INT#LTR/Copia	NC_029256.1-16733778-16742204-Oryza_sativa_Japonica, NC_029256.1-17665568-17674796-Oryza_sativa_Japonica, NC_029257.1-12702782-12711963-Oryza_sativa_Japonica, NC_029257.1-14515183-14524116-Oryza_sativa_Japonica, NC_029257.1-32479715-32486143-Oryza_sativa_Japonica, NC_029257.1-7385272-7391021-Oryza_sativa_Japonica, NC_029259.1-13322874-13332126-Oryza_sativa_Japonica, NC_029259.1-18302600-18311862-…
OG0000015	Os0077_INT#LTR/Gypsy	NC_029256.1-1463988-1481744-Oryza_sativa_Japonica, NC_029256.1-3205011-3219107-Oryza_sativa_Japonica, NC_029256.1-34264462-34274856-Oryza_sativa_Japonica, NC_029257.1-21719568-21733196-Oryza_sativa_Japonica, NC_029257.1-26179216-26195212-Oryza_sativa_Japonica, NC_029257.1-28591717-28605645-Oryza_sativa_Japonica, NC_029257.1-32223607-32237781-Oryza_sativa_Japonica, NC_029259.1-27961685-27975756-Or…
OG0000016	Os0157_INT#LTR/Gypsy	NC_029256.1-36572889-36585393-Oryza_sativa_Japonica, NC_029257.1-22797103-22800445-Oryza_sativa_Japonica, NC_029257.1-25289776-25302241-Oryza_sativa_Japonica, NC_029257.1-30505456-30508826-Oryza_sativa_Japonica, NC_029259.1-13736526-13749034-Oryza_sativa_Japonica, NC_029259.1-5076296-5088599-Oryza_sativa_Japonica, NC_029260.1-25972618-25983257-Oryza_sativa_Japonica, NC_029260.1-2952425-2966774-Or…
OG0000017		NC_029256.1-11830911-11839793-Oryza_sativa_Japonica, NC_029256.1-18909840-18918738-Oryza_sativa_Japonica, NC_029256.1-939748-953850-Oryza_sativa_Japonica, NC_029257.1-17917386-17926462-Oryza_sativa_Japonica, NC_029259.1-17797600-17810389-Oryza_sativa_Japonica, NC_029259.1-29926407-29938622-Oryza_sativa_Japonica, NC_029261.1-16075623-16084497-Oryza_sativa_Japonica, NC_029261.1-751077-765905-Oryza_…
OG0000018	Os0391_INT_CRR#LTR/Gypsy	NC_029256.1-18288211-18295926-Oryza_sativa_Japonica, NC_029259.1-13974602-13982331-Oryza_sativa_Japonica, NC_029259.1-23675081-23682811-Oryza_sativa_Japonica, NC_029259.1-9017829-9037655-Oryza_sativa_Japonica, NC_029259.1-9023041-9030804-Oryza_sativa_Japonica, NC_029260.1-12363422-12371176-Oryza_sativa_Japonica, NC_029261.1-15135905-15143662-Oryza_sativa_Japonica, NC_029261.1-20534002-20541777-Or…
OG0000019	Os0019_INT#LTR/Gypsy, Os3536_INT#LTR/Gypsy	NC_029256.1-29789781-29800960-Oryza_sativa_Japonica, NC_029257.1-17650157-17669776-Oryza_sativa_Japonica, NC_029258.1-20275927-20289124-Oryza_sativa_Japonica, NC_029259.1-1595576-1604725-Oryza_sativa_Japonica, NC_029259.1-4976647-4990211-Oryza_sativa_Japonica, NC_029261.1-10762635-10776447-Oryza_sativa_Japonica, NC_029261.1-13132585-13141879-Oryza_sativa_Japonica, NC_029261.1-3731576-3745273-Oryz…
OG0000020	Os2371_INT#LTR/Copia	NC_029257.1-3114223-3119479-Oryza_sativa_Japonica, NC_029257.1-33946910-33952121-Oryza_sativa_Japonica, NC_029258.1-14730285-14735495-Oryza_sativa_Japonica, NC_029258.1-35847969-35853250-Oryza_sativa_Japonica, NC_029259.1-26160198-26164928-Oryza_sativa_Japonica, NC_029259.1-28656632-28661033-Oryza_sativa_Japonica, NC_029259.1-31588769-31593496-Oryza_sativa_Japonica, NC_029259.1-31883262-31887715-…
OG0000021	Os0356_INT#LTR/Copia	NC_029256.1-905432-910511-Oryza_sativa_Japonica, NC_029259.1-32780732-32785740-Oryza_sativa_Japonica, NC_029259.1-6677511-6682376-Oryza_sativa_Japonica, NC_029260.1-27467211-27472340-Oryza_sativa_Japonica, NC_029261.1-20428097-20433109-Oryza_sativa_Japonica, NC_029263.1-25723350-25728439-Oryza_sativa_Japonica, NC_029264.1-6445334-6450357-Oryza_sativa_Japonica, NC_029265.1-18208403-18213519-Oryza_…
OG0000022	Os3477_INT#LTR/Gypsy	NC_029256.1-27392812-27414375-Oryza_sativa_Japonica, NC_029256.1-27399711-27408724-Oryza_sativa_Japonica, NC_029257.1-3804274-3812736-Oryza_sativa_Japonica, NC_029259.1-17849092-17858102-Oryza_sativa_Japonica, NC_029260.1-3017146-3026187-Oryza_sativa_Japonica, NC_029261.1-25841844-25850629-Oryza_sativa_Japonica, NC_029262.1-12404023-12412937-Oryza_sativa_Japonica, NC_029263.1-12535871-12545074-Or…
OG0000023		NC_029258.1-13358147-13369922-Oryza_sativa_Japonica, NC_029259.1-3153480-3165171-Oryza_sativa_Japonica, NC_029259.1-7790603-7798096-Oryza_sativa_Japonica, NC_029260.1-14280936-14292721-Oryza_sativa_Japonica, NC_029263.1-14138699-14150367-Oryza_sativa_Japonica, NC_029263.1-6695771-6707450-Oryza_sativa_Japonica, NC_029263.1-6768197-6779841-Oryza_sativa_Japonica, NC_029264.1-108774-123607-Oryza_sati…
OG0000024		NC_029260.1-3392196-3398961-Oryza_sativa_Japonica, NC_029261.1-14095311-14102699-Oryza_sativa_Japonica, NC_029262.1-12556148-12563361-Oryza_sativa_Japonica, NC_029262.1-14441536-14448829-Oryza_sativa_Japonica, NC_029262.1-15760087-15767490-Oryza_sativa_Japonica, NC_029263.1-16005368-16012637-Oryza_sativa_Japonica, NC_029264.1-7263718-7270993-Oryza_sativa_Japonica, NC_029264.1-9811352-9818435-Oryz…
OG0000025	Os0028_INT#LTR/Copia, Os0076_INT#LTR/Copia, Os0592_INT#LTR/Copia, Os1064_INT#LTR/Copia, Os1281_INT#LTR/Copia	NC_029262.1-16074307-16080782-Oryza_sativa_Japonica, NC_029262.1-6993419-6998981-Oryza_sativa_Japonica, NC_029262.1-7357375-7363854-Oryza_sativa_Japonica, NC_029267.1-282980-289646-Oryza_sativa_Japonica
OG0000026	Os3312_INT#LTR/Gypsy	NC_029256.1-17524381-17531793-Oryza_sativa_Japonica, NC_029257.1-11674606-11682158-Oryza_sativa_Japonica, NC_029257.1-13734073-13743301-Oryza_sativa_Japonica, NC_029257.1-16136501-16144054-Oryza_sativa_Japonica, NC_029263.1-12955566-12963410-Oryza_sativa_Japonica, NC_029263.1-13184550-13192178-Oryza_sativa_Japonica, NC_029263.1-13276557-13284184-Oryza_sativa_Japonica, NC_029265.1-10284401-1029202…
OG0000027	Os0139_INT#LTR/Gypsy	NC_029256.1-17773913-17785533-Oryza_sativa_Japonica, NC_029257.1-11325219-11334922-Oryza_sativa_Japonica, NC_029257.1-19732292-19746368-Oryza_sativa_Japonica, NC_029264.1-22827828-22840176-Oryza_sativa_Japonica, NC_029264.1-3108205-3116684-Oryza_sativa_Japonica, NC_029264.1-4231441-4246801-Oryza_sativa_Japonica, NC_029264.1-9307964-9318201-Oryza_sativa_Japonica
OG0000028	Os0350_INT#LTR/Copia, Os0492_INT#LTR/Copia	NC_029256.1-29881326-29886610-Oryza_sativa_Japonica, NC_029257.1-2527393-2532702-Oryza_sativa_Japonica, NC_029258.1-16158383-16163671-Oryza_sativa_Japonica, NC_029258.1-2937274-2942556-Oryza_sativa_Japonica, NC_029262.1-2496896-2502178-Oryza_sativa_Japonica, NC_029265.1-13472427-13478528-Oryza_sativa_Japonica
OG0000029	Os2007_INT#LTR/Copia	NC_029257.1-9147425-9153548-Oryza_sativa_Japonica, NC_029261.1-7388590-7393664-Oryza_sativa_Japonica, NC_029263.1-26641053-26646118-Oryza_sativa_Japonica, NC_029264.1-12132761-12137692-Oryza_sativa_Japonica, NC_029266.1-4145331-4150403-Oryza_sativa_Japonica, NC_029267.1-15252799-15257873-Oryza_sativa_Japonica, NC_029267.1-18375471-18380539-Oryza_sativa_Japonica
OG0000030	Os0097_INT#LTR/Copia, Os3495_INT#LTR/Copia, Os3529_INT#LTR/Copia	NC_029256.1-28337716-28342910-Oryza_sativa_Japonica, NC_029257.1-20322703-20327853-Oryza_sativa_Japonica, NC_029266.1-46935-52144-Oryza_sativa_Japonica, NC_029267.1-45346-50556-Oryza_sativa_Japonica
OG0000031	Os0262_INT#LTR/Gypsy	NC_029256.1-21859590-21872883-Oryza_sativa_Japonica, NC_029257.1-24302734-24313633-Oryza_sativa_Japonica, NC_029260.1-12875541-12885664-Oryza_sativa_Japonica, NC_029263.1-12025102-12026859-Oryza_sativa_Japonica, NC_029265.1-1979173-1986452-Oryza_sativa_Japonica, NC_029266.1-2032687-2044001-Oryza_sativa_Japonica
OG0000032	Os1537_INT#LTR/Copia, Os3556_INT#LTR/Copia	NC_029257.1-8328957-8340984-Oryza_sativa_Japonica, NC_029261.1-25456414-25470547-Oryza_sativa_Japonica, NC_029263.1-19247615-19259422-Oryza_sativa_Japonica, NC_029264.1-8547591-8558194-Oryza_sativa_Japonica, NC_029266.1-23520977-23532556-Oryza_sativa_Japonica
OG0000033	Os1884_INT#LTR/Copia	NC_029256.1-17699910-17705447-Oryza_sativa_Japonica, NC_029258.1-33702004-33707273-Oryza_sativa_Japonica, NC_029262.1-7769898-7779549-Oryza_sativa_Japonica, NC_029263.1-21526178-21531282-Oryza_sativa_Japonica, NC_029266.1-17405325-17410828-Oryza_sativa_Japonica, NC_029266.1-21223777-21232733-Oryza_sativa_Japonica
OG0000034	Os3306_INT#LTR/Copia	NC_029256.1-8822537-8827749-Oryza_sativa_Japonica, NC_029257.1-15986614-15991153-Oryza_sativa_Japonica, NC_029259.1-12696613-12701779-Oryza_sativa_Japonica, NC_029259.1-17455908-17460998-Oryza_sativa_Japonica, NC_029259.1-32394369-32399553-Oryza_sativa_Japonica, NC_029265.1-1879576-1884787-Oryza_sativa_Japonica
OG0000035	Os0128_INT#LTR/Copia	NC_029260.1-12913900-12919333-Oryza_sativa_Japonica, NC_029262.1-14683325-14688186-Oryza_sativa_Japonica, NC_029262.1-20056191-20059830-Oryza_sativa_Japonica, NC_029266.1-12769647-12775525-Oryza_sativa_Japonica, NC_029266.1-17879233-17884469-Oryza_sativa_Japonica
OG0000036	Os0176_INT#LTR/Copia	NC_029258.1-6685431-6697334-Oryza_sativa_Japonica, NC_029259.1-19744870-19756801-Oryza_sativa_Japonica, NC_029260.1-4754860-4766834-Oryza_sativa_Japonica, NC_029262.1-13086158-13098203-Oryza_sativa_Japonica, NC_029263.1-20510286-20522239-Oryza_sativa_Japonica
OG0000037	Os0278_INT#LTR/Gypsy, Os0311_INT#LTR/Gypsy, Os1713_INT#LTR/Gypsy	NC_029261.1-14538068-14540859-Oryza_sativa_Japonica, NC_029261.1-14731696-14739450-Oryza_sativa_Japonica, NC_029262.1-14123636-14137914-Oryza_sativa_Japonica
OG0000038	Os0443_INT#LTR/Copia	NC_029256.1-832962-839862-Oryza_sativa_Japonica, NC_029257.1-18425812-18432819-Oryza_sativa_Japonica, NC_029263.1-18420831-18427748-Oryza_sativa_Japonica, NC_029263.1-2556362-2566650-Oryza_sativa_Japonica, NC_029266.1-26924786-26931700-Oryza_sativa_Japonica
OG0000039	Os0715_INT#LTR/Copia	NC_029258.1-15034249-15039177-Oryza_sativa_Japonica, NC_029258.1-34947483-34952494-Oryza_sativa_Japonica, NC_029262.1-2382039-2387071-Oryza_sativa_Japonica, NC_029267.1-2527367-2532300-Oryza_sativa_Japonica, NC_029267.1-27417637-27422567-Oryza_sativa_Japonica
OG0000040	Os0988_INT#LTR/Copia	NC_029256.1-13643116-13651133-Oryza_sativa_Japonica, NC_029259.1-806118-818188-Oryza_sativa_Japonica, NC_029264.1-10353176-10361296-Oryza_sativa_Japonica, NC_029266.1-5736444-5744010-Oryza_sativa_Japonica, NC_029267.1-15508549-15516631-Oryza_sativa_Japonica
OG0000041	Os3307_INT#LTR/Copia	NC_029256.1-39403038-39407762-Oryza_sativa_Japonica, NC_029257.1-3066375-3071099-Oryza_sativa_Japonica, NC_029260.1-16591005-16594153-Oryza_sativa_Japonica, NC_029265.1-1057189-1059745-Oryza_sativa_Japonica, NC_029265.1-1758145-1762873-Oryza_sativa_Japonica
OG0000042	Os0057_INT#LTR/Copia	NC_029256.1-1608760-1617689-Oryza_sativa_Japonica, NC_029259.1-34254762-34265080-Oryza_sativa_Japonica, NC_029261.1-24750284-24760567-Oryza_sativa_Japonica, NC_029264.1-17435191-17445532-Oryza_sativa_Japonica
OG0000043	Os0200_INT#LTR/Gypsy	NC_029256.1-37207134-37221290-Oryza_sativa_Japonica, NC_029262.1-15080855-15095173-Oryza_sativa_Japonica, NC_029262.1-8634924-8648620-Oryza_sativa_Japonica, NC_029267.1-5343802-5357669-Oryza_sativa_Japonica
OG0000044	Os0305_INT#LTR/Gypsy, Os3304_INT#LTR/Gypsy, Os3305_INT#LTR/Gypsy, Os3504_INT#LTR/Gypsy	NC_029262.1-10190544-10195736-Oryza_sativa_Japonica
OG0000045	Os0321_INT#LTR/Copia, Os3414_INT#LTR/Copia, Os3640_INT#LTR/Copia	NC_029260.1-6033941-6039426-Oryza_sativa_Japonica, NC_029263.1-4424796-4430245-Oryza_sativa_Japonica
OG0000046	Os0830_INT#LTR/Copia	NC_029260.1-21573731-21578925-Oryza_sativa_Japonica, NC_029261.1-26176130-26181092-Oryza_sativa_Japonica, NC_029262.1-20641776-20646970-Oryza_sativa_Japonica, NC_029263.1-24415979-24421162-Oryza_sativa_Japonica
OG0000047	Os1214_INT#LTR/Copia	NC_029258.1-17561435-17566569-Oryza_sativa_Japonica, NC_029259.1-14107452-14112680-Oryza_sativa_Japonica, NC_029265.1-15282163-15287391-Oryza_sativa_Japonica, NC_029267.1-4011798-4017026-Oryza_sativa_Japonica
OG0000048	Os1300_INT#LTR/Gypsy	NC_029256.1-7749200-7754663-Oryza_sativa_Japonica, NC_029257.1-8042263-8047763-Oryza_sativa_Japonica, NC_029264.1-15974995-15980464-Oryza_sativa_Japonica, NC_029267.1-10390077-10395556-Oryza_sativa_Japonica
OG0000049	Os3467_INT#LTR/Gypsy, Os3506_INT#LTR/Gypsy	NC_029261.1-23662758-23668236-Oryza_sativa_Japonica, NC_029266.1-18888568-18894048-Oryza_sativa_Japonica, NC_029267.1-18923529-18928982-Oryza_sativa_Japonica
OG0000050		NC_029256.1-11947969-11951795-Oryza_sativa_Japonica, NC_029256.1-27528951-27532837-Oryza_sativa_Japonica, NC_029258.1-4144672-4148610-Oryza_sativa_Japonica, NC_029261.1-23313512-23317435-Oryza_sativa_Japonica, NC_029267.1-6955799-6959739-Oryza_sativa_Japonica
OG0000051		NC_029256.1-20917841-20922828-Oryza_sativa_Japonica, NC_029256.1-41752707-41757635-Oryza_sativa_Japonica, NC_029260.1-18255885-18260566-Oryza_sativa_Japonica, NC_029261.1-18129325-18134338-Oryza_sativa_Japonica, NC_029267.1-590075-595002-Oryza_sativa_Japonica
OG0000052		NC_029257.1-10289544-10297435-Oryza_sativa_Japonica, NC_029260.1-13444647-13456028-Oryza_sativa_Japonica, NC_029263.1-8863438-8872617-Oryza_sativa_Japonica, NC_029264.1-3032736-3041820-Oryza_sativa_Japonica, NC_029266.1-8533267-8542419-Oryza_sativa_Japonica
OG0000053		NC_029257.1-20090995-20098363-Oryza_sativa_Japonica, NC_029258.1-22052234-22063745-Oryza_sativa_Japonica, NC_029258.1-22694004-22697294-Oryza_sativa_Japonica, NC_029261.1-557180-564394-Oryza_sativa_Japonica, NC_029267.1-4234129-4241449-Oryza_sativa_Japonica
OG0000054		NC_029259.1-28730568-28737377-Oryza_sativa_Japonica, NC_029260.1-19572049-19576329-Oryza_sativa_Japonica, NC_029262.1-20681225-20686773-Oryza_sativa_Japonica, NC_029265.1-18093854-18098336-Oryza_sativa_Japonica, NC_029265.1-1813448-1817220-Oryza_sativa_Japonica
OG0000055	Os0110_INT#LTR/Copia, Os0130_INT#LTR/Copia, Os3298_INT#LTR/Copia	NC_029266.1-3452181-3457377-Oryza_sativa_Japonica
OG0000056	Os0151_INT#LTR/Gypsy, Os3535_INT#LTR/Gypsy	NC_029256.1-31907041-31911766-Oryza_sativa_Japonica, NC_029258.1-5003017-5009198-Oryza_sativa_Japonica
OG0000057	Os0183_INT#LTR/Copia, Os3318_INT#LTR/Copia	NC_029258.1-11311296-11316129-Oryza_sativa_Japonica, NC_029258.1-35094075-35098869-Oryza_sativa_Japonica
OG0000058	Os0242_INT#LTR/Gypsy, Os1895_INT#LTR/Gypsy, Os3417_INT#LTR/Gypsy	NC_029261.1-21052022-21060205-Oryza_sativa_Japonica
OG0000059	Os0254_INT#LTR/Gypsy, Os0289_INT#LTR/Gypsy	NC_029262.1-4242609-4247820-Oryza_sativa_Japonica, NC_029263.1-28401943-28407130-Oryza_sativa_Japonica
OG0000060	Os0462_INT#LTR/Copia, Os3410_INT#LTR/Copia	NC_029262.1-17329760-17334685-Oryza_sativa_Japonica, NC_029263.1-11025249-11030127-Oryza_sativa_Japonica
OG0000061	Os0748_INT#LTR/Gypsy	NC_029256.1-5736015-5741179-Oryza_sativa_Japonica, NC_029258.1-17014113-17019379-Oryza_sativa_Japonica, NC_029258.1-3055428-3064555-Oryza_sativa_Japonica
OG0000062	Os0873_INT#LTR/Copia	NC_029256.1-31234271-31239068-Oryza_sativa_Japonica, NC_029263.1-25943613-25948414-Oryza_sativa_Japonica, NC_029265.1-2215126-2219904-Oryza_sativa_Japonica
OG0000063	Os0994_INT#LTR/Gypsy, Os3494_INT#LTR/Gypsy	NC_029259.1-14486529-14492559-Oryza_sativa_Japonica, NC_029265.1-14725121-14731132-Oryza_sativa_Japonica
OG0000064	Os1083_INT#LTR/Copia, Os3415_INT#LTR/Copia	NC_029260.1-27608527-27613547-Oryza_sativa_Japonica, NC_029263.1-16136984-16143423-Oryza_sativa_Japonica
OG0000065	Os1285_INT#LTR/Copia	NC_029256.1-19015820-19020846-Oryza_sativa_Japonica, NC_029256.1-31122307-31127332-Oryza_sativa_Japonica, NC_029257.1-24427169-24432189-Oryza_sativa_Japonica
OG0000066	Os3408_INT#LTR/Gypsy	NC_029257.1-14406851-14415284-Oryza_sativa_Japonica, NC_029257.1-15245775-15255074-Oryza_sativa_Japonica, NC_029262.1-11535432-11542161-Oryza_sativa_Japonica
OG0000067	Os3450_INT#LTR/Copia, Os3460_INT#LTR/Copia, Os3562_INT#LTR/Copia	NC_029260.1-28605664-28610423-Oryza_sativa_Japonica
OG0000068	Os3471_INT#LTR/Copia, Os3476_INT#LTR/Copia	NC_029262.1-17063492-17068318-Oryza_sativa_Japonica, NC_029262.1-28811666-28816490-Oryza_sativa_Japonica
OG0000069	Os3491_INT#LTR/Copia	NC_029256.1-41605060-41610584-Oryza_sativa_Japonica, NC_029262.1-5915353-5919132-Oryza_sativa_Japonica, NC_029267.1-2354103-2359625-Oryza_sativa_Japonica
OG0000070	Os3517_INT#LTR/Copia	NC_029257.1-460603-465572-Oryza_sativa_Japonica, NC_029258.1-24858207-24863028-Oryza_sativa_Japonica, NC_029265.1-6254711-6263182-Oryza_sativa_Japonica
OG0000071		NC_029257.1-15240218-15244933-Oryza_sativa_Japonica, NC_029258.1-22427903-22432644-Oryza_sativa_Japonica, NC_029262.1-10827051-10831812-Oryza_sativa_Japonica, NC_029262.1-16562807-16566159-Oryza_sativa_Japonica
OG0000072	Os0058_INT#LTR/Gypsy, Os1525_INT#LTR/Gypsy	NC_029257.1-9914450-9920006-Oryza_sativa_Japonica
OG0000073	Os0101_INT#LTR/Copia	NC_029262.1-8225936-8230602-Oryza_sativa_Japonica, NC_029265.1-9362584-9367242-Oryza_sativa_Japonica
OG0000074	Os0107_INT#LTR/Gypsy, Os3515_INT#LTR/Gypsy	NC_029257.1-24397080-24403487-Oryza_sativa_Japonica
OG0000075	Os0143_INT#LTR/Gypsy, Os1528_INT#LTR/Gypsy	NC_029267.1-13666173-13671655-Oryza_sativa_Japonica
OG0000076	Os0149_INT#LTR/Gypsy	NC_029257.1-12979432-12984464-Oryza_sativa_Japonica, NC_029267.1-14211593-14216626-Oryza_sativa_Japonica
OG0000077	Os0233_INT#LTR/Copia, Os3342_INT#LTR/Copia	NC_029260.1-14707452-14712285-Oryza_sativa_Japonica
OG0000078	Os0336_INT#LTR/Gypsy, Os2253_INT#LTR/Gypsy	NC_029262.1-4445899-4454892-Oryza_sativa_Japonica
OG0000079	Os0351_INT#LTR/Copia	NC_029256.1-37128127-37133012-Oryza_sativa_Japonica, NC_029258.1-3289785-3294667-Oryza_sativa_Japonica
OG0000080	Os0353_INT#LTR/Copia	NC_029258.1-36207325-36212090-Oryza_sativa_Japonica, NC_029260.1-23454279-23459137-Oryza_sativa_Japonica
OG0000081	Os0395_INT#LTR/Gypsy, Os0850_INT#LTR/Gypsy	NC_029258.1-24075577-24084859-Oryza_sativa_Japonica
OG0000082	Os0736_INT#LTR/Gypsy	NC_029258.1-2615594-2626431-Oryza_sativa_Japonica, NC_029258.1-2619077-2624315-Oryza_sativa_Japonica
OG0000083	Os1113_INT#LTR/Copia	NC_029256.1-9409124-9416731-Oryza_sativa_Japonica, NC_029260.1-5168609-5176303-Oryza_sativa_Japonica
OG0000084	Os1144_INT#LTR/Copia	NC_029259.1-11139227-11148914-Oryza_sativa_Japonica, NC_029262.1-13260328-13267166-Oryza_sativa_Japonica
OG0000085	Os1294_INT#LTR/Gypsy, Os1399_INT#LTR/Gypsy, Os2002_INT#LTR/Gypsy
OG0000086	Os1335_INT#LTR/Gypsy	NC_029257.1-31377033-31390116-Oryza_sativa_Japonica, NC_029259.1-27084115-27097086-Oryza_sativa_Japonica
OG0000087	Os1458_INT#LTR/Copia	NC_029260.1-8235829-8240870-Oryza_sativa_Japonica, NC_029264.1-10411794-10417066-Oryza_sativa_Japonica
OG0000088	Os3308_INT#LTR/Copia	NC_029260.1-7486358-7491166-Oryza_sativa_Japonica, NC_029267.1-9407376-9412110-Oryza_sativa_Japonica
OG0000089	Os3310_INT#LTR/Copia	NC_029256.1-24774789-24779572-Oryza_sativa_Japonica, NC_029258.1-17583121-17587904-Oryza_sativa_Japonica
OG0000090	Os3311_INT#LTR/Copia	NC_029258.1-20300447-20305308-Oryza_sativa_Japonica, NC_029258.1-20346852-20352738-Oryza_sativa_Japonica
OG0000091	Os3319_INT#LTR/Copia	NC_029264.1-8070242-8075034-Oryza_sativa_Japonica, NC_029266.1-24441063-24445960-Oryza_sativa_Japonica
OG0000092	Os3320_INT#LTR/Copia	NC_029257.1-2309996-2312155-Oryza_sativa_Japonica, NC_029261.1-22804885-22810036-Oryza_sativa_Japonica
OG0000093	Os3324_INT#LTR/Gypsy	NC_029257.1-29532924-29544699-Oryza_sativa_Japonica, NC_029257.1-29534662-29541129-Oryza_sativa_Japonica
OG0000094	Os3335_INT#LTR/Copia	NC_029259.1-29418682-29423874-Oryza_sativa_Japonica, NC_029261.1-16094342-16099537-Oryza_sativa_Japonica
OG0000095	Os3441_INT#LTR/Copia	NC_029256.1-39336540-39341465-Oryza_sativa_Japonica, NC_029266.1-26077304-26081700-Oryza_sativa_Japonica
OG0000096	Os3456_INT#LTR/Gypsy, Os3484_INT#LTR/Gypsy	NC_029263.1-22059851-22065251-Oryza_sativa_Japonica
OG0000097	Os3457_INT#LTR/Gypsy	NC_029259.1-34853449-34858970-Oryza_sativa_Japonica, NC_029266.1-27779418-27784822-Oryza_sativa_Japonica
OG0000098	Os3458_INT#LTR/Copia	NC_029256.1-40853065-40858191-Oryza_sativa_Japonica, NC_029266.1-20868913-20874040-Oryza_sativa_Japonica
OG0000099	Os3469_INT#LTR/Copia	NC_029260.1-24914833-24924034-Oryza_sativa_Japonica, NC_029261.1-23639148-23643901-Oryza_sativa_Japonica
OG0000100	Os3474_INT#LTR/Gypsy	NC_029259.1-10251923-10256697-Oryza_sativa_Japonica, NC_029262.1-19989490-19995173-Oryza_sativa_Japonica
OG0000101	Os3485_INT#LTR/Gypsy	NC_029256.1-21950018-21955966-Oryza_sativa_Japonica, NC_029266.1-27245109-27251057-Oryza_sativa_Japonica
OG0000102	Os3488_INT#LTR/Copia, Os3492_INT#LTR/Copia	NC_029264.1-16396710-16401558-Oryza_sativa_Japonica
OG0000103	Os3509_INT#LTR/Gypsy	NC_029257.1-15051319-15055232-Oryza_sativa_Japonica, NC_029267.1-27219924-27225582-Oryza_sativa_Japonica
OG0000104	Os3513_INT#LTR/Copia	NC_029257.1-1767928-1772823-Oryza_sativa_Japonica, NC_029261.1-24824448-24829267-Oryza_sativa_Japonica
OG0000105	Os3518_INT#LTR/Copia	NC_029257.1-18040187-18045412-Oryza_sativa_Japonica, NC_029260.1-7105860-7111060-Oryza_sativa_Japonica
OG0000106		NC_029256.1-38172649-38174670-Oryza_sativa_Japonica, NC_029264.1-21822604-21824722-Oryza_sativa_Japonica, NC_029267.1-8872008-8874029-Oryza_sativa_Japonica
OG0000107		NC_029258.1-19150515-19162182-Oryza_sativa_Japonica, NC_029262.1-12604482-12615152-Oryza_sativa_Japonica, NC_029264.1-4123419-4135032-Oryza_sativa_Japonica
OG0000108		NC_029259.1-3772496-3782865-Oryza_sativa_Japonica, NC_029260.1-12262539-12271658-Oryza_sativa_Japonica, NC_029261.1-16901538-16909221-Oryza_sativa_Japonica
OG0000109	Os0034_INT#LTR/Gypsy	NC_029259.1-30457203-30463445-Oryza_sativa_Japonica
OG0000110	Os0079_INT#LTR/Gypsy	NC_029257.1-12155242-12164448-Oryza_sativa_Japonica
OG0000111	Os0111_INT#LTR/Gypsy	NC_029266.1-11707421-11712610-Oryza_sativa_Japonica
OG0000112	Os0140_INT#LTR/Gypsy	NC_029267.1-9005218-9013704-Oryza_sativa_Japonica
OG0000113	Os0146_INT#LTR/Copia	NC_029267.1-13802039-13807518-Oryza_sativa_Japonica
OG0000114	Os0160_INT#LTR/Copia	NC_029258.1-32201338-32207015-Oryza_sativa_Japonica
OG0000115	Os0168_INT#LTR/Copia	NC_029258.1-32460085-32469355-Oryza_sativa_Japonica
OG0000116	Os0170_INT#LTR/Gypsy	NC_029258.1-34743297-34754985-Oryza_sativa_Japonica
OG0000117	Os0175_INT#LTR/Gypsy	NC_029259.1-6193741-6198999-Oryza_sativa_Japonica
OG0000118	Os0178_INT#LTR/Gypsy	NC_029259.1-14945072-14950681-Oryza_sativa_Japonica
OG0000119	Os0189_INT#LTR/Gypsy	NC_029259.1-19760563-19769914-Oryza_sativa_Japonica
OG0000120	Os0195_INT_RIRE1#LTR/Copia	NC_029263.1-10859256-10865621-Oryza_sativa_Japonica
OG0000121	Os0199_INT#LTR/Gypsy	NC_029259.1-34007634-34013670-Oryza_sativa_Japonica
OG0000122	Os0210_INT#LTR/Copia	NC_029260.1-6240563-6245814-Oryza_sativa_Japonica
OG0000123	Os0217_INT#LTR/Gypsy	NC_029260.1-8633089-8639146-Oryza_sativa_Japonica
OG0000124	Os0232_INT#LTR/Gypsy	NC_029261.1-15585257-15595566-Oryza_sativa_Japonica
OG0000125	Os0234_INT#LTR/Gypsy	NC_029260.1-22429950-22435879-Oryza_sativa_Japonica
OG0000126	Os0237_INT#LTR/Gypsy	NC_029266.1-20637372-20643021-Oryza_sativa_Japonica
OG0000127	Os0253_INT#LTR/Copia	NC_029265.1-23311-38331-Oryza_sativa_Japonica
OG0000128	Os0258_INT#LTR/Copia	NC_029262.1-9013328-9018709-Oryza_sativa_Japonica
OG0000129	Os0259_INT#LTR/Copia	NC_029262.1-15626579-15631842-Oryza_sativa_Japonica
OG0000130	Os0263_INT#LTR/Gypsy	NC_029262.1-19473911-19479389-Oryza_sativa_Japonica
OG0000131	Os0267_INT#LTR/Gypsy	NC_029265.1-12506517-12511872-Oryza_sativa_Japonica
OG0000132	Os0272_INT#LTR/Gypsy	NC_029262.1-28662835-28668493-Oryza_sativa_Japonica
OG0000133	Os0283_INT#LTR/Copia	NC_029262.1-29366253-29369571-Oryza_sativa_Japonica
OG0000134	Os0285_INT#LTR/Gypsy	NC_029263.1-1303378-1309051-Oryza_sativa_Japonica
OG0000135	Os0288_INT#LTR/Gypsy	NC_029263.1-5945267-5950837-Oryza_sativa_Japonica
OG0000136	Os0290_INT#LTR/Gypsy	NC_029264.1-2662136-2668355-Oryza_sativa_Japonica
OG0000137	Os0295_INT#LTR/Gypsy	NC_029264.1-9263935-9269462-Oryza_sativa_Japonica
OG0000138	Os0316_INT#LTR/Gypsy	NC_029266.1-21739599-21745054-Oryza_sativa_Japonica
OG0000139	Os0338_INT#LTR/Copia	NC_029262.1-17365251-17370736-Oryza_sativa_Japonica
OG0000140	Os0365_INT_Truncator#LTR/Gypsy, Os0366_INT_Truncator#LTR/Gypsy
OG0000141	Os0476_INT#LTR/Copia	NC_029259.1-22066810-22073680-Oryza_sativa_Japonica
OG0000142	Os0699_INT#LTR/Copia	NC_029257.1-17529801-17534821-Oryza_sativa_Japonica
OG0000143	Os0831_INT#LTR/Gypsy	NC_029261.1-4558058-4562779-Oryza_sativa_Japonica
OG0000144	Os0961_INT#LTR/Gypsy, Os0985_INT#LTR/Gypsy
OG0000145	Os0993_INT#LTR/Gypsy	NC_029256.1-13447618-13452997-Oryza_sativa_Japonica
OG0000146	Os1061_INT#LTR/Copia	NC_029257.1-3460420-3465914-Oryza_sativa_Japonica
OG0000147	Os1207_INT#LTR/Gypsy	NC_029260.1-3411340-3416828-Oryza_sativa_Japonica
OG0000148	Os1299_INT#LTR/Gypsy	NC_029257.1-26682562-26687975-Oryza_sativa_Japonica
OG0000149	Os1353_INT#LTR/Gypsy	NC_029258.1-29707049-29717114-Oryza_sativa_Japonica
OG0000150	Os1610_INT#LTR/Gypsy	NC_029259.1-2258182-2264151-Oryza_sativa_Japonica
OG0000151	Os1960_INT#LTR/Copia	NC_029260.1-26206795-26211613-Oryza_sativa_Japonica
OG0000152	Os2298_INT#LTR/Gypsy	NC_029261.1-23165422-23170542-Oryza_sativa_Japonica
OG0000153	Os2708_INT#LTR/Copia	NC_029263.1-1848083-1853080-Oryza_sativa_Japonica
OG0000154	Os3290_INT#LTR/Gypsy	NC_029260.1-18057220-18062564-Oryza_sativa_Japonica
OG0000155	Os3299_INT#LTR/Copia	NC_029263.1-18414661-18419875-Oryza_sativa_Japonica
OG0000156	Os3300_INT#LTR/Gypsy	NC_029261.1-27308897-27314537-Oryza_sativa_Japonica
OG0000157	Os3303_INT#LTR/Gypsy	NC_029265.1-21971868-21977804-Oryza_sativa_Japonica
OG0000158	Os3309_INT#LTR/Copia	NC_029257.1-22957446-22962994-Oryza_sativa_Japonica
OG0000159	Os3313_INT#LTR/Gypsy	NC_029265.1-19794918-19800615-Oryza_sativa_Japonica
OG0000160	Os3314_INT#LTR/Gypsy	NC_029259.1-12489599-12495135-Oryza_sativa_Japonica
OG0000161	Os3316_INT#LTR/Gypsy	NC_029259.1-7930216-7935830-Oryza_sativa_Japonica
OG0000162	Os3317_INT#LTR/Gypsy	NC_029265.1-23117957-23123464-Oryza_sativa_Japonica
OG0000163	Os3334_INT#LTR/Copia, Os3478_INT#LTR/Copia
OG0000164	Os3413_INT#LTR/Copia	NC_029261.1-7469714-7474523-Oryza_sativa_Japonica
OG0000165	Os3416_INT#LTR/Copia	NC_029261.1-28882368-28887265-Oryza_sativa_Japonica
OG0000166	Os3427_INT#LTR/Gypsy	NC_029259.1-12205373-12210959-Oryza_sativa_Japonica
OG0000167	Os3440_INT#LTR/Copia	NC_029256.1-17887069-17892286-Oryza_sativa_Japonica
OG0000168	Os3449_INT#LTR/Gypsy	NC_029256.1-16673345-16678895-Oryza_sativa_Japonica
OG0000169	Os3452_INT#LTR/Gypsy	NC_029259.1-26820754-26830309-Oryza_sativa_Japonica
OG0000170	Os3455_INT#LTR/Gypsy	NC_029262.1-6884133-6889486-Oryza_sativa_Japonica
OG0000171	Os3459_INT#LTR/Copia	NC_029259.1-4261650-4267732-Oryza_sativa_Japonica
OG0000172	Os3461_INT#LTR/Gypsy	NC_029256.1-16437145-16442441-Oryza_sativa_Japonica
OG0000173	Os3462_INT#LTR/Copia	NC_029260.1-17157786-17162585-Oryza_sativa_Japonica
OG0000174	Os3463_INT#LTR/Gypsy	NC_029260.1-8058648-8064632-Oryza_sativa_Japonica
OG0000175	Os3466_INT#LTR/Gypsy	NC_029261.1-27770701-27776337-Oryza_sativa_Japonica
OG0000176	Os3472_INT#LTR/Gypsy	NC_029261.1-8826944-8832592-Oryza_sativa_Japonica
OG0000177	Os3473_INT#LTR/Gypsy	NC_029261.1-7195956-7201638-Oryza_sativa_Japonica
OG0000178	Os3479_INT#LTR/Gypsy	NC_029263.1-3791969-3797868-Oryza_sativa_Japonica
OG0000179	Os3480_INT#LTR/Gypsy	NC_029263.1-6328262-6334282-Oryza_sativa_Japonica
OG0000180	Os3481_INT#LTR/Gypsy	NC_029263.1-15600178-15605427-Oryza_sativa_Japonica
OG0000181	Os3483_INT#LTR/Gypsy	NC_029263.1-18921918-18927524-Oryza_sativa_Japonica
OG0000182	Os3486_INT#LTR/Gypsy	NC_029264.1-4419940-4425600-Oryza_sativa_Japonica
OG0000183	Os3487_INT#LTR/Gypsy	NC_029264.1-10885140-10890426-Oryza_sativa_Japonica
OG0000184	Os3490_INT#LTR/Copia	NC_029264.1-18059367-18064177-Oryza_sativa_Japonica
OG0000185	Os3493_INT#LTR/Gypsy	NC_029265.1-7584329-7589460-Oryza_sativa_Japonica
OG0000186	Os3497_INT#LTR/Gypsy	NC_029257.1-25366556-25371977-Oryza_sativa_Japonica
OG0000187	Os3500_INT#LTR/Gypsy	NC_029256.1-34970456-34976129-Oryza_sativa_Japonica
OG0000188	Os3502_INT#LTR/Copia	NC_029267.1-1573263-1578111-Oryza_sativa_Japonica
OG0000189	Os3505_INT#LTR/Copia	NC_029267.1-14167499-14172156-Oryza_sativa_Japonica
OG0000190	Os3507_INT#LTR/Gypsy	NC_029257.1-19035760-19041110-Oryza_sativa_Japonica
OG0000191	Os3514_INT#LTR/Copia	NC_029265.1-9369460-9373839-Oryza_sativa_Japonica
OG0000192	Os3558_INT#LTR/Copia	NC_029267.1-21302664-21307875-Oryza_sativa_Japonica
OG0000193	Os3653_INT#LTR/Copia	NC_029258.1-18379905-18387089-Oryza_sativa_Japonica
OG0000194	Os3654_INT#LTR/Gypsy	NC_029260.1-11412819-11418110-Oryza_sativa_Japonica
OG0000195		NC_029259.1-20718046-20723272-Oryza_sativa_Japonica, NC_029264.1-7847815-7853388-Oryza_sativa_Japonica
OG0000196		NC_029261.1-30234793-30240448-Oryza_sativa_Japonica, NC_029266.1-27355749-27361411-Oryza_sativa_Japonica
OG0000197		NC_029262.1-18813955-18818146-Oryza_sativa_Japonica, NC_029265.1-15415369-15419582-Oryza_sativa_Japonica
OG0000198		NC_029263.1-3851293-3857241-Oryza_sativa_Japonica, NC_029264.1-13252476-13259270-Oryza_sativa_Japonica
OG0000199		NC_029266.1-10634093-10638640-Oryza_sativa_Japonica, NC_029266.1-23448521-23454660-Oryza_sativa_Japonica
OG0000200		NC_029267.1-19232974-19237693-Oryza_sativa_Japonica, NC_029267.1-21105486-21110208-Oryza_sativa_Japonica

## Sheet: Ortho-groups assigned LTR-RTs
Table S6: The 1114 LTR-RT elements (PlantLTRdb) were assigned to ortho-groups using the previously curated LTR-RT library
LTR-RT ID	NCBI Accession	Start in sequence	End in sequence	Length	Classification	Clade	Internal domains complete	Internal domains
NC_029256.1-10030391-10042897-Oryza_sativa_Japonica	NC_029256.1	10030391	10042897	12506	Nonautonomous:Gypsy	Retand	yes	GAG|Retand PROT|Retand RT|Retand RH|Retand INT|Retand
NC_029256.1-10070754-10077186-Oryza_sativa_Japonica	NC_029256.1	10070754	10077186	6432	Nonautonomous:Copia	Ikeros	yes	GAG|Ikeros PROT|Ikeros INT|Ikeros RT|Ikeros RH|Ikeros
NC_029256.1-10852347-10864933-Oryza_sativa_Japonica	NC_029256.1	10852347	10864933	12586	Autonomous:Gypsy	Retand	yes	GAG|Retand PROT|Retand RT|Retand RH|Retand INT|Retand
NC_029256.1-11123580-11128984-Oryza_sativa_Japonica	NC_029256.1	11123580	11128984	5404	Nonautonomous:Gypsy	Retand	no	GAG|Retand INT|Retand RH|Retand
NC_029256.1-12531209-12542835-Oryza_sativa_Japonica	NC_029256.1	12531209	12542835	11626	Nonautonomous:Gypsy	Tekay	no	GAG|Tekay
NC_029256.1-12791740-12802327-Oryza_sativa_Japonica	NC_029256.1	12791740	12802327	10587	Nonautonomous:Unknown	none	none	none
NC_029256.1-12948185-12960278-Oryza_sativa_Japonica	NC_029256.1	12948185	12960278	12093	Nonautonomous:Gypsy	Tekay	yes	GAG|Tekay PROT|Tekay RT|Tekay RH|Tekay INT|Tekay CHD|Tekay
NC_029256.1-13012813-13026821-Oryza_sativa_Japonica	NC_029256.1	13012813	13026821	14008	Nonautonomous:Gypsy	Tekay	no	GAG|Tekay
NC_029256.1-13447618-13452997-Oryza_sativa_Japonica	NC_029256.1	13447618	13452997	5379	Nonautonomous:Gypsy	Reina	yes	GAG|Reina PROT|Reina RT|Reina RH|Reina INT|Reina CHD|Reina
NC_029256.1-13643116-13651133-Oryza_sativa_Japonica	NC_029256.1	13643116	13651133	8017	Nonautonomous:Copia	Bianca	yes	GAG|Bianca PROT|Bianca INT|Bianca RT|Bianca RH|Bianca
NC_029256.1-13737084-13747295-Oryza_sativa_Japonica	NC_029256.1	13737084	13747295	10211	Nonautonomous:Unknown	none	none	none
NC_029256.1-14490130-14502769-Oryza_sativa_Japonica	NC_029256.1	14490130	14502769	12639	Nonautonomous:Gypsy	Retand	yes	GAG|Retand PROT|Retand RT|Retand RH|Retand INT|Retand
NC_029256.1-1463988-1481744-Oryza_sativa_Japonica	NC_029256.1	1463988	1481744	17756	Nonautonomous:Gypsy	Tekay	yes	GAG|Tekay PROT|Tekay RT|Tekay RH|Tekay INT|Tekay CHD|Tekay
NC_029256.1-14660482-14672575-Oryza_sativa_Japonica	NC_029256.1	14660482	14672575	12093	Nonautonomous:Gypsy	Tekay	yes	GAG|Tekay PROT|Tekay RT|Tekay RH|Tekay INT|Tekay CHD|Tekay
NC_029256.1-15036628-15049416-Oryza_sativa_Japonica	NC_029256.1	15036628	15049416	12788	Nonautonomous:Gypsy	Retand	yes	GAG|Retand PROT|Retand RT|Retand RH|Retand INT|Retand
NC_029256.1-15516703-15529227-Oryza_sativa_Japonica	NC_029256.1	15516703	15529227	12524	Nonautonomous:Gypsy	Retand	yes	GAG|Retand PROT|Retand RT|Retand RH|Retand INT|Retand
NC_029256.1-1608760-1617689-Oryza_sativa_Japonica	NC_029256.1	1608760	1617689	8929	Nonautonomous:Copia	SIRE	yes	GAG|SIRE PROT|SIRE INT|SIRE RT|SIRE RH|SIRE
NC_029256.1-16159379-16172135-Oryza_sativa_Japonica	NC_029256.1	16159379	16172135	12756	Nonautonomous:Gypsy	Retand	yes	GAG|Retand PROT|Retand RT|Retand RH|Retand INT|Retand
NC_029256.1-16196015-16199552-Oryza_sativa_Japonica	NC_029256.1	16196015	16199552	3537	Nonautonomous:Gypsy	Retand	no	GAG|Retand
NC_029256.1-16268965-16278422-Oryza_sativa_Japonica	NC_029256.1	16268965	16278422	9457	Nonautonomous:Unknown	none	none	none
NC_029256.1-16437145-16442441-Oryza_sativa_Japonica	NC_029256.1	16437145	16442441	5296	Nonautonomous:Gypsy	Reina	yes	GAG|Reina PROT|Reina RT|Reina RH|Reina INT|Reina CHD|Reina
NC_029256.1-16574111-16586637-Oryza_sativa_Japonica	NC_029256.1	16574111	16586637	12526	Nonautonomous:Gypsy	Retand	yes	GAG|Retand PROT|Retand RT|Retand RH|Retand INT|Retand
NC_029256.1-16673345-16678895-Oryza_sativa_Japonica	NC_029256.1	16673345	16678895	5550	Nonautonomous:Gypsy	Reina	yes	GAG|Reina PROT|Reina RT|Reina RH|Reina INT|Reina CHD|Reina
NC_029256.1-17051361-17064292-Oryza_sativa_Japonica	NC_029256.1	17051361	17064292	12931	Nonautonomous:Gypsy	Tekay	yes	CHDCR|CRM GAG|Tekay PROT|Tekay RT|Tekay RH|Tekay INT|Tekay CHD|Tekay
NC_029256.1-17327592-17333914-Oryza_sativa_Japonica	NC_029256.1	17327592	17333914	6322	Nonautonomous:Gypsy	Retand	no	GAG|Retand PROT|Retand
NC_029256.1-17524381-17531793-Oryza_sativa_Japonica	NC_029256.1	17524381	17531793	7412	Nonautonomous:Gypsy	CRM	yes	GAG|CRM PROT|CRM RT|CRM RH|CRM INT|CRM CHDCR|CRM
NC_029256.1-17634697-17646379-Oryza_sativa_Japonica	NC_029256.1	17634697	17646379	11682	Nonautonomous:Gypsy	Tekay	yes	GAG|Tekay PROT|Tekay RT|Tekay RH|Tekay INT|Tekay CHD|Tekay
NC_029256.1-17665568-17674796-Oryza_sativa_Japonica	NC_029256.1	17665568	17674796	9228	Nonautonomous:Copia	SIRE	yes	GAG|SIRE PROT|SIRE INT|SIRE RT|SIRE RH|SIRE
NC_029256.1-17773913-17785533-Oryza_sativa_Japonica	NC_029256.1	17773913	17785533	11620	Nonautonomous:Gypsy	Retand	no	GAG|Retand PROT|Retand RT|Retand RH|Retand
NC_029256.1-18288211-18295926-Oryza_sativa_Japonica	NC_029256.1	18288211	18295926	7715	Nonautonomous:Gypsy	CRM	yes	CHDCR|CRM GAG|CRM PROT|CRM RT|CRM RH|CRM INT|CRM
NC_029256.1-19015820-19020846-Oryza_sativa_Japonica	NC_029256.1	19015820	19020846	5026	Nonautonomous:Copia	Ale	yes	GAG|Ale PROT|Ale INT|Ale RT|Ale RH|Ale
NC_029256.1-19210366-19226268-Oryza_sativa_Japonica	NC_029256.1	19210366	19226268	15902	Nonautonomous:Gypsy	Retand	yes	GAG|Retand PROT|Retand RT|Retand RH|Retand INT|Retand
NC_029256.1-19579596-19588992-Oryza_sativa_Japonica	NC_029256.1	19579596	19588992	9396	Nonautonomous:Unknown	none	none	none
NC_029256.1-19623702-19635034-Oryza_sativa_Japonica	NC_029256.1	19623702	19635034	11332	Nonautonomous:Gypsy	Retand	yes	GAG|Retand PROT|Retand RT|Retand RH|Retand INT|Retand
NC_029256.1-19651297-19672540-Oryza_sativa_Japonica	NC_029256.1	19651297	19672540	21243	Nonautonomous:Gypsy	Tekay	no	GAG|Tekay
NC_029256.1-19657142-19668207-Oryza_sativa_Japonica	NC_029256.1	19657142	19668207	11065	Nonautonomous:Gypsy	Tekay	no	GAG|Tekay
NC_029256.1-19754163-19764928-Oryza_sativa_Japonica	NC_029256.1	19754163	19764928	10765	Nonautonomous:Unknown	none	none	none
NC_029256.1-19790409-19801721-Oryza_sativa_Japonica	NC_029256.1	19790409	19801721	11312	Nonautonomous:Gypsy	Retand	yes	GAG|Retand PROT|Retand RT|Retand RH|Retand INT|Retand
NC_029256.1-20219976-20231325-Oryza_sativa_Japonica	NC_029256.1	20219976	20231325	11349	Nonautonomous:Gypsy	Retand	yes	GAG|Retand PROT|Retand RT|Retand RH|Retand INT|Retand
NC_029256.1-20672888-20684995-Oryza_sativa_Japonica	NC_029256.1	20672888	20684995	12107	Nonautonomous:Gypsy	Tekay	yes	GAG|Tekay PROT|Tekay RT|Tekay RH|Tekay INT|Tekay CHD|Tekay
NC_029256.1-20792818-20804147-Oryza_sativa_Japonica	NC_029256.1	20792818	20804147	11329	Nonautonomous:Gypsy	Retand	yes	GAG|Retand PROT|Retand RT|Retand RH|Retand INT|Retand
NC_029256.1-21048196-21054488-Oryza_sativa_Japonica	NC_029256.1	21048196	21054488	6292	Nonautonomous:Copia	Ikeros	yes	GAG|Ikeros PROT|Ikeros INT|Ikeros RT|Ikeros RH|Ikeros
NC_029256.1-21859590-21872883-Oryza_sativa_Japonica	NC_029256.1	21859590	21872883	13293	Nonautonomous:Gypsy	Athila	no	GAG|Athila
NC_029256.1-21950018-21955966-Oryza_sativa_Japonica	NC_029256.1	21950018	21955966	5948	Nonautonomous:Gypsy	Reina	yes	GAG|Reina PROT|Reina RT|Reina RH|Reina INT|Reina CHD|Reina
NC_029256.1-22400913-22412383-Oryza_sativa_Japonica	NC_029256.1	22400913	22412383	11470	Nonautonomous:Gypsy	Retand	yes	GAG|Retand PROT|Retand RT|Retand RH|Retand INT|Retand
NC_029256.1-2335749-2341144-Oryza_sativa_Japonica	NC_029256.1	2335749	2341144	5395	Nonautonomous:Gypsy	Retand	no	GAG|Retand INT|Retand RH|Retand
NC_029256.1-23593876-23606776-Oryza_sativa_Japonica	NC_029256.1	23593876	23606776	12900	Autonomous:Gypsy	Retand	yes	GAG|Retand PROT|Retand RT|Retand RH|Retand INT|Retand
NC_029256.1-24742852-24748439-Oryza_sativa_Japonica	NC_029256.1	24742852	24748439	5587	Nonautonomous:Unknown	none	none	none
NC_029256.1-24774789-24779572-Oryza_sativa_Japonica	NC_029256.1	24774789	24779572	4783	Autonomous:Copia	Ale	yes	GAG|Ale PROT|Ale INT|Ale RT|Ale RH|Ale
NC_029256.1-25099687-25112581-Oryza_sativa_Japonica	NC_029256.1	25099687	25112581	12894	Nonautonomous:Gypsy	Retand	yes	GAG|Retand PROT|Retand RT|Retand RH|Retand INT|Retand
NC_029256.1-25566853-25573317-Oryza_sativa_Japonica	NC_029256.1	25566853	25573317	6464	Nonautonomous:Copia	Ikeros	yes	GAG|Ikeros PROT|Ikeros INT|Ikeros RT|Ikeros RH|Ikeros
NC_029256.1-25653443-25664756-Oryza_sativa_Japonica	NC_029256.1	25653443	25664756	11313	Nonautonomous:Gypsy	Retand	yes	GAG|Retand PROT|Retand RT|Retand RH|Retand INT|Retand
NC_029256.1-26015183-26027996-Oryza_sativa_Japonica	NC_029256.1	26015183	26027996	12813	Nonautonomous:Gypsy	Retand	yes	GAG|Retand PROT|Retand RT|Retand RH|Retand INT|Retand
NC_029256.1-26980168-26991452-Oryza_sativa_Japonica	NC_029256.1	26980168	26991452	11284	Nonautonomous:Gypsy	Tekay	no	GAG|Tekay
NC_029256.1-27392812-27414375-Oryza_sativa_Japonica	NC_029256.1	27392812	27414375	21563	Nonautonomous:Gypsy	Retand	yes	GAG|Retand PROT|Retand RT|Retand RH|Retand INT|Retand
NC_029256.1-27399711-27408724-Oryza_sativa_Japonica	NC_029256.1	27399711	27408724	9013	Nonautonomous:Unknown	none	none	none
NC_029256.1-28337716-28342910-Oryza_sativa_Japonica	NC_029256.1	28337716	28342910	5194	Nonautonomous:Copia	Ivana	yes	GAG|Ivana PROT|Ivana INT|Ivana RT|Ivana RH|Ivana
NC_029256.1-29083643-29096569-Oryza_sativa_Japonica	NC_029256.1	29083643	29096569	12926	Nonautonomous:Gypsy	Retand	yes	GAG|Retand PROT|Retand RT|Retand RH|Retand INT|Retand
NC_029256.1-29789781-29800960-Oryza_sativa_Japonica	NC_029256.1	29789781	29800960	11179	Nonautonomous:Gypsy	Ogre	yes	GAG|Ogre PROT|Ogre RT|Ogre RH|Ogre INT|Ogre
NC_029256.1-29881326-29886610-Oryza_sativa_Japonica	NC_029256.1	29881326	29886610	5284	Nonautonomous:Copia	Ivana	yes	GAG|Ivana PROT|Ivana INT|Ivana RT|Ivana RH|Ivana
NC_029256.1-30432455-30445251-Oryza_sativa_Japonica	NC_029256.1	30432455	30445251	12796	Nonautonomous:Gypsy	Retand	yes	GAG|Retand PROT|Retand RT|Retand RH|Retand INT|Retand
NC_029256.1-31234271-31239068-Oryza_sativa_Japonica	NC_029256.1	31234271	31239068	4797	Nonautonomous:Copia	Ale	yes	GAG|Ale PROT|Ale INT|Ale RT|Ale RH|Ale
NC_029256.1-31438707-31451545-Oryza_sativa_Japonica	NC_029256.1	31438707	31451545	12838	Nonautonomous:Gypsy	Retand	yes	GAG|Retand PROT|Retand RT|Retand RH|Retand INT|Retand
NC_029256.1-31907041-31911766-Oryza_sativa_Japonica	NC_029256.1	31907041	31911766	4725	Nonautonomous:Gypsy	Reina	yes	GAG|Reina PROT|Reina RT|Reina RH|Reina INT|Reina
NC_029256.1-3205011-3219107-Oryza_sativa_Japonica	NC_029256.1	3205011	3219107	14096	Nonautonomous:Gypsy	Tekay	yes	GAG|Tekay PROT|Tekay RT|Tekay RH|Tekay INT|Tekay CHD|Tekay
NC_029256.1-32205102-32216717-Oryza_sativa_Japonica	NC_029256.1	32205102	32216717	11615	Nonautonomous:Gypsy	Retand	no	GAG|Retand RT|Retand RH|Retand INT|Retand
NC_029256.1-33416682-33426967-Oryza_sativa_Japonica	NC_029256.1	33416682	33426967	10285	Nonautonomous:Gypsy	Retand	no	GAG|Retand PROT|Retand RT|Retand RH|Retand
NC_029256.1-34264462-34274856-Oryza_sativa_Japonica	NC_029256.1	34264462	34274856	10394	Nonautonomous:Copia	Ikeros	no	GAG|Ikeros
NC_029256.1-34970456-34976129-Oryza_sativa_Japonica	NC_029256.1	34970456	34976129	5673	Nonautonomous:Gypsy	Reina	yes	GAG|Reina PROT|Reina RT|Reina RH|Reina INT|Reina CHD|Reina
NC_029256.1-35668081-35680964-Oryza_sativa_Japonica	NC_029256.1	35668081	35680964	12883	Nonautonomous:Gypsy	Retand	yes	GAG|Retand PROT|Retand RT|Retand RH|Retand INT|Retand
NC_029256.1-36572889-36585393-Oryza_sativa_Japonica	NC_029256.1	36572889	36585393	12504	Nonautonomous:Gypsy	Tekay	yes	GAG|Tekay PROT|Tekay RT|Tekay RH|Tekay INT|Tekay CHD|Tekay
NC_029256.1-37128127-37133012-Oryza_sativa_Japonica	NC_029256.1	37128127	37133012	4885	Nonautonomous:Copia	Ale	yes	GAG|Ale PROT|Ale INT|Ale RT|Ale RH|Ale
NC_029256.1-37207134-37221290-Oryza_sativa_Japonica	NC_029256.1	37207134	37221290	14156	Nonautonomous:Gypsy	Tekay	yes	GAG|Tekay PROT|Tekay RT|Tekay RH|Tekay INT|Tekay CHD|Tekay
NC_029256.1-37489558-37502486-Oryza_sativa_Japonica	NC_029256.1	37489558	37502486	12928	Nonautonomous:Gypsy	Retand	yes	GAG|Retand PROT|Retand RT|Retand RH|Retand INT|Retand
NC_029256.1-38580949-38592243-Oryza_sativa_Japonica	NC_029256.1	38580949	38592243	11294	Nonautonomous:Gypsy	Retand	yes	GAG|Retand PROT|Retand RT|Retand RH|Retand INT|Retand
NC_029256.1-38772231-38786812-Oryza_sativa_Japonica	NC_029256.1	38772231	38786812	14581	Nonautonomous:Gypsy	Retand	yes	GAG|Retand PROT|Retand RT|Retand RH|Retand INT|Retand
NC_029256.1-39336540-39341465-Oryza_sativa_Japonica	NC_029256.1	39336540	39341465	4925	Nonautonomous:Copia	Ale	yes	GAG|Ale PROT|Ale INT|Ale RT|Ale RH|Ale
NC_029256.1-39403038-39407762-Oryza_sativa_Japonica	NC_029256.1	39403038	39407762	4724	Autonomous:Copia	Ale	yes	GAG|Ale PROT|Ale INT|Ale RT|Ale RH|Ale
NC_029256.1-40041741-40047023-Oryza_sativa_Japonica	NC_029256.1	40041741	40047023	5282	Nonautonomous:Gypsy	Retand	no	GAG|Retand INT|Retand RH|Retand
NC_029256.1-40853065-40858191-Oryza_sativa_Japonica	NC_029256.1	40853065	40858191	5126	Nonautonomous:Copia	Ivana	yes	GAG|Ivana PROT|Ivana INT|Ivana RT|Ivana RH|Ivana
NC_029256.1-41030613-41035993-Oryza_sativa_Japonica	NC_029256.1	41030613	41035993	5380	Nonautonomous:Gypsy	Retand	no	GAG|Retand INT|Retand RH|Retand
NC_029256.1-41409808-41422659-Oryza_sativa_Japonica	NC_029256.1	41409808	41422659	12851	Nonautonomous:Gypsy	Retand	yes	GAG|Retand PROT|Retand RT|Retand RH|Retand INT|Retand
NC_029256.1-41605060-41610584-Oryza_sativa_Japonica	NC_029256.1	41605060	41610584	5524	Nonautonomous:Copia	Ale	yes	GAG|Ale PROT|Ale INT|Ale RT|Ale RH|Ale
NC_029256.1-43026340-43039306-Oryza_sativa_Japonica	NC_029256.1	43026340	43039306	12966	Nonautonomous:Gypsy	Retand	yes	GAG|Retand PROT|Retand RT|Retand RH|Retand INT|Retand
NC_029256.1-43256443-43269336-Oryza_sativa_Japonica	NC_029256.1	43256443	43269336	12893	Nonautonomous:Gypsy	Retand	yes	GAG|Retand PROT|Retand RT|Retand RH|Retand INT|Retand
NC_029256.1-4598083-4611172-Oryza_sativa_Japonica	NC_029256.1	4598083	4611172	13089	Nonautonomous:Gypsy	Retand	yes	GAG|Retand PROT|Retand RT|Retand RH|Retand INT|Retand
NC_029256.1-4638953-4645057-Oryza_sativa_Japonica	NC_029256.1	4638953	4645057	6104	Nonautonomous:Copia	Ikeros	no	GAG|Ikeros PROT|Ikeros RT|Ikeros RH|Ikeros
NC_029256.1-465114-477986-Oryza_sativa_Japonica	NC_029256.1	465114	477986	12872	Nonautonomous:Gypsy	Retand	yes	GAG|Retand PROT|Retand RT|Retand RH|Retand INT|Retand
NC_029256.1-4855911-4868809-Oryza_sativa_Japonica	NC_029256.1	4855911	4868809	12898	Nonautonomous:Gypsy	Retand	yes	GAG|Retand PROT|Retand RT|Retand RH|Retand INT|Retand
NC_029256.1-4932004-4943303-Oryza_sativa_Japonica	NC_029256.1	4932004	4943303	11299	Nonautonomous:Gypsy	Retand	yes	GAG|Retand PROT|Retand RT|Retand RH|Retand INT|Retand
NC_029256.1-5736015-5741179-Oryza_sativa_Japonica	NC_029256.1	5736015	5741179	5164	Nonautonomous:Gypsy	Reina	yes	GAG|Reina PROT|Reina RT|Reina RH|Reina INT|Reina CHD|Reina
NC_029256.1-660815-671473-Oryza_sativa_Japonica	NC_029256.1	660815	671473	10658	Nonautonomous:Gypsy	Retand	yes	GAG|Retand PROT|Retand RT|Retand RH|Retand INT|Retand
NC_029256.1-6745807-6758688-Oryza_sativa_Japonica	NC_029256.1	6745807	6758688	12881	Nonautonomous:Gypsy	Retand	yes	GAG|Retand PROT|Retand RT|Retand RH|Retand INT|Retand
NC_029256.1-7749200-7754663-Oryza_sativa_Japonica	NC_029256.1	7749200	7754663	5463	Nonautonomous:Gypsy	Reina	yes	GAG|Reina PROT|Reina RT|Reina RH|Reina INT|Reina CHD|Reina
NC_029256.1-815864-831945-Oryza_sativa_Japonica	NC_029256.1	815864	831945	16081	Nonautonomous:Gypsy	Retand	yes	GAG|Retand PROT|Retand RT|Retand RH|Retand INT|Retand
NC_029256.1-832962-839862-Oryza_sativa_Japonica	NC_029256.1	832962	839862	6900	Nonautonomous:Copia	Ikeros	yes	GAG|Ikeros PROT|Ikeros INT|Ikeros RT|Ikeros RH|Ikeros
NC_029256.1-8508602-8519866-Oryza_sativa_Japonica	NC_029256.1	8508602	8519866	11264	Nonautonomous:Gypsy	Retand	yes	GAG|Retand PROT|Retand RT|Retand RH|Retand INT|Retand
NC_029256.1-880796-891658-Oryza_sativa_Japonica	NC_029256.1	880796	891658	10862	Nonautonomous:Unknown	none	none	none
NC_029256.1-905432-910511-Oryza_sativa_Japonica	NC_029256.1	905432	910511	5079	Nonautonomous:Copia	Tork	yes	GAG|Tork PROT|Tork INT|Tork RT|Tork RH|Tork
NC_029256.1-9351481-9369643-Oryza_sativa_Japonica	NC_029256.1	9351481	9369643	18162	Nonautonomous:Gypsy	Retand	yes	GAG|Retand PROT|Retand RT|Retand RH|Retand INT|Retand
NC_029256.1-9409124-9416731-Oryza_sativa_Japonica	NC_029256.1	9409124	9416731	7607	Nonautonomous:Copia	Bianca	yes	GAG|Bianca PROT|Bianca INT|Bianca RT|Bianca RH|Bianca
NC_029257.1-10297430-10308922-Oryza_sativa_Japonica	NC_029257.1	10297430	10308922	11492	Nonautonomous:Gypsy	Retand	no	GAG|Retand PROT|Retand RT|Retand RH|Retand INT|Retand
NC_029257.1-10599337-10610821-Oryza_sativa_Japonica	NC_029257.1	10599337	10610821	11484	Nonautonomous:Gypsy	Retand	no	GAG|Retand PROT|Retand RT|Retand RH|Retand INT|Retand
NC_029257.1-11325219-11334922-Oryza_sativa_Japonica	NC_029257.1	11325219	11334922	9703	Nonautonomous:Gypsy	Retand	no	GAG|Retand PROT|Retand RT|Retand
NC_029257.1-11674606-11682158-Oryza_sativa_Japonica	NC_029257.1	11674606	11682158	7552	Nonautonomous:Gypsy	CRM	yes	GAG|CRM PROT|CRM RT|CRM RH|CRM INT|CRM CHDCR|CRM
NC_029257.1-11819608-11827221-Oryza_sativa_Japonica	NC_029257.1	11819608	11827221	7613	Nonautonomous:Gypsy	Tekay	no	GAG|Tekay
NC_029257.1-11897046-11902756-Oryza_sativa_Japonica	NC_029257.1	11897046	11902756	5710	Nonautonomous:Copia	Ivana	yes	GAG|Ivana PROT|Ivana INT|Ivana RT|Ivana RH|Ivana
NC_029257.1-11911875-11923376-Oryza_sativa_Japonica	NC_029257.1	11911875	11923376	11501	Nonautonomous:Gypsy	Tekay	no	GAG|Tekay
NC_029257.1-12155242-12164448-Oryza_sativa_Japonica	NC_029257.1	12155242	12164448	9206	Nonautonomous:Gypsy	Reina	yes	GAG|Reina PROT|Reina RT|Reina RH|Reina INT|Reina CHD|Reina
NC_029257.1-12979432-12984464-Oryza_sativa_Japonica	NC_029257.1	12979432	12984464	5032	Nonautonomous:Gypsy	Reina	yes	GAG|Reina PROT|Reina RT|Reina RH|Reina INT|Reina CHD|Reina
NC_029257.1-13379101-13395198-Oryza_sativa_Japonica	NC_029257.1	13379101	13395198	16097	Nonautonomous:Gypsy	Retand	yes	GAG|Retand PROT|Retand RT|Retand RH|Retand INT|Retand
NC_029257.1-13734073-13743301-Oryza_sativa_Japonica	NC_029257.1	13734073	13743301	9228	Nonautonomous:Gypsy	CRM	yes	CHDCR|CRM GAG|CRM PROT|CRM RT|CRM RH|CRM INT|CRM
NC_029257.1-14406851-14415284-Oryza_sativa_Japonica	NC_029257.1	14406851	14415284	8433	Nonautonomous:Gypsy	Ogre	no	GAG|Ogre PROT|Ogre RH|Ogre INT|Ogre
NC_029257.1-14515183-14524116-Oryza_sativa_Japonica	NC_029257.1	14515183	14524116	8933	Nonautonomous:Copia	SIRE	yes	GAG|SIRE PROT|SIRE INT|SIRE RT|SIRE RH|SIRE
NC_029257.1-14908736-14918940-Oryza_sativa_Japonica	NC_029257.1	14908736	14918940	10204	Nonautonomous:Unknown	none	none	none
NC_029257.1-15051319-15055232-Oryza_sativa_Japonica	NC_029257.1	15051319	15055232	3913	Nonautonomous:Gypsy	Reina	no	GAG|Reina PROT|Reina RT|Reina RH|Reina CHD|Reina
NC_029257.1-15115762-15127391-Oryza_sativa_Japonica	NC_029257.1	15115762	15127391	11629	Nonautonomous:Gypsy	Retand	yes	GAG|Retand PROT|Retand RT|Retand RH|Retand INT|Retand
NC_029257.1-15245775-15255074-Oryza_sativa_Japonica	NC_029257.1	15245775	15255074	9299	Nonautonomous:Gypsy	Ogre	yes	GAG|Ogre PROT|Ogre RT|Ogre RH|Ogre INT|Ogre
NC_029257.1-15809620-15821178-Oryza_sativa_Japonica	NC_029257.1	15809620	15821178	11558	Nonautonomous:Gypsy	Retand	yes	GAG|Retand PROT|Retand RT|Retand RH|Retand INT|Retand
NC_029257.1-15986614-15991153-Oryza_sativa_Japonica	NC_029257.1	15986614	15991153	4539	Nonautonomous:Copia	Ivana	yes	GAG|Ivana PROT|Ivana INT|Ivana RT|Ivana RH|Ivana
NC_029257.1-16136501-16144054-Oryza_sativa_Japonica	NC_029257.1	16136501	16144054	7553	Nonautonomous:Gypsy	CRM	yes	GAG|CRM PROT|CRM RT|CRM RH|CRM INT|CRM CHDCR|CRM
NC_029257.1-17177624-17183389-Oryza_sativa_Japonica	NC_029257.1	17177624	17183389	5765	Nonautonomous:Copia	Ivana	yes	GAG|Ivana PROT|Ivana INT|Ivana RT|Ivana RH|Ivana
NC_029257.1-17650157-17669776-Oryza_sativa_Japonica	NC_029257.1	17650157	17669776	19619	Nonautonomous:Gypsy	Ogre	yes	GAG|Ogre PROT|Ogre RT|Ogre RH|Ogre INT|Ogre
NC_029257.1-18147848-18162707-Oryza_sativa_Japonica	NC_029257.1	18147848	18162707	14859	Nonautonomous:Gypsy	Retand	yes	GAG|Retand PROT|Retand RT|Retand RH|Retand INT|Retand
NC_029257.1-18425812-18432819-Oryza_sativa_Japonica	NC_029257.1	18425812	18432819	7007	Nonautonomous:Copia	Ikeros	yes	GAG|Ikeros PROT|Ikeros INT|Ikeros RT|Ikeros RH|Ikeros
NC_029257.1-18665429-18676288-Oryza_sativa_Japonica	NC_029257.1	18665429	18676288	10859	Nonautonomous:Gypsy	Retand	yes	GAG|Retand PROT|Retand RT|Retand RH|Retand INT|Retand
NC_029257.1-1889507-1902096-Oryza_sativa_Japonica	NC_029257.1	1889507	1902096	12589	Nonautonomous:Gypsy	Retand	yes	GAG|Retand PROT|Retand RT|Retand RH|Retand INT|Retand
NC_029257.1-18960266-18971480-Oryza_sativa_Japonica	NC_029257.1	18960266	18971480	11214	Nonautonomous:Gypsy	Retand	no	GAG|Retand RT|Retand RH|Retand INT|Retand
NC_029257.1-19732292-19746368-Oryza_sativa_Japonica	NC_029257.1	19732292	19746368	14076	Nonautonomous:Gypsy	Retand	no	GAG|Retand PROT|Retand RT|Retand INT|Retand
NC_029257.1-19766081-19780578-Oryza_sativa_Japonica	NC_029257.1	19766081	19780578	14497	Nonautonomous:Gypsy	Retand	yes	GAG|Retand PROT|Retand RT|Retand RH|Retand INT|Retand
NC_029257.1-20322703-20327853-Oryza_sativa_Japonica	NC_029257.1	20322703	20327853	5150	Nonautonomous:Copia	Ivana	yes	GAG|Ivana PROT|Ivana INT|Ivana RT|Ivana RH|Ivana
NC_029257.1-21719568-21733196-Oryza_sativa_Japonica	NC_029257.1	21719568	21733196	13628	Nonautonomous:Gypsy	Tekay	yes	GAG|Tekay PROT|Tekay RT|Tekay RH|Tekay INT|Tekay CHD|Tekay
NC_029257.1-22797103-22800445-Oryza_sativa_Japonica	NC_029257.1	22797103	22800445	3342	Nonautonomous:Copia	Tork	no	GAG|Tork PROT|Tork
NC_029257.1-23145141-23151697-Oryza_sativa_Japonica	NC_029257.1	23145141	23151697	6556	Nonautonomous:Unknown	none	none	none
NC_029257.1-23194599-23207525-Oryza_sativa_Japonica	NC_029257.1	23194599	23207525	12926	Nonautonomous:Gypsy	Retand	yes	GAG|Retand PROT|Retand RT|Retand RH|Retand INT|Retand
NC_029257.1-23248465-23254531-Oryza_sativa_Japonica	NC_029257.1	23248465	23254531	6066	Nonautonomous:Copia	Ikeros	no	GAG|Ikeros PROT|Ikeros RT|Ikeros RH|Ikeros
NC_029257.1-24253160-24258718-Oryza_sativa_Japonica	NC_029257.1	24253160	24258718	5558	Nonautonomous:Gypsy	Retand	no	GAG|Retand INT|Retand RH|Retand
NC_029257.1-24302734-24313633-Oryza_sativa_Japonica	NC_029257.1	24302734	24313633	10899	Nonautonomous:Gypsy	Tekay	no	GAG|Tekay
NC_029257.1-24427169-24432189-Oryza_sativa_Japonica	NC_029257.1	24427169	24432189	5020	Nonautonomous:Copia	Ale	yes	GAG|Ale PROT|Ale INT|Ale RT|Ale RH|Ale
NC_029257.1-24608388-24620446-Oryza_sativa_Japonica	NC_029257.1	24608388	24620446	12058	Nonautonomous:Gypsy	Tekay	yes	GAG|Tekay PROT|Tekay RT|Tekay RH|Tekay INT|Tekay CHD|Tekay
NC_029257.1-25031259-25041074-Oryza_sativa_Japonica	NC_029257.1	25031259	25041074	9815	Nonautonomous:Gypsy	Retand	no	GAG|Retand RT|Retand RH|Retand INT|Retand
NC_029257.1-2527393-2532702-Oryza_sativa_Japonica	NC_029257.1	2527393	2532702	5309	Nonautonomous:Copia	Ivana	yes	GAG|Ivana PROT|Ivana INT|Ivana RT|Ivana RH|Ivana
NC_029257.1-25289776-25302241-Oryza_sativa_Japonica	NC_029257.1	25289776	25302241	12465	Nonautonomous:Gypsy	Tekay	yes	GAG|Tekay PROT|Tekay RT|Tekay RH|Tekay INT|Tekay CHD|Tekay
NC_029257.1-25366556-25371977-Oryza_sativa_Japonica	NC_029257.1	25366556	25371977	5421	Nonautonomous:Gypsy	Reina	yes	GAG|Reina PROT|Reina RT|Reina RH|Reina INT|Reina CHD|Reina
NC_029257.1-25931156-25937166-Oryza_sativa_Japonica	NC_029257.1	25931156	25937166	6010	Nonautonomous:Copia	Ikeros	no	GAG|Ikeros PROT|Ikeros RT|Ikeros RH|Ikeros
NC_029257.1-26179216-26195212-Oryza_sativa_Japonica	NC_029257.1	26179216	26195212	15996	Nonautonomous:Gypsy	Tekay	yes	GAG|Ale PROT|Ale RT|Tekay RH|Tekay INT|Tekay CHD|Tekay
NC_029257.1-26682562-26687975-Oryza_sativa_Japonica	NC_029257.1	26682562	26687975	5413	Nonautonomous:Gypsy	Reina	yes	GAG|Reina PROT|Reina RT|Reina RH|Reina INT|Reina CHD|Reina
NC_029257.1-28052717-28065578-Oryza_sativa_Japonica	NC_029257.1	28052717	28065578	12861	Autonomous:Gypsy	Retand	yes	GAG|Retand PROT|Retand RT|Retand RH|Retand INT|Retand
NC_029257.1-28591717-28605645-Oryza_sativa_Japonica	NC_029257.1	28591717	28605645	13928	Nonautonomous:Gypsy	Tekay	yes	GAG|Tekay PROT|Tekay RT|Tekay RH|Tekay INT|Tekay CHD|Tekay
NC_029257.1-28834115-28849628-Oryza_sativa_Japonica	NC_029257.1	28834115	28849628	15513	Nonautonomous:Gypsy	Retand	yes	GAG|Retand PROT|Retand RT|Retand RH|Retand INT|Retand
NC_029257.1-2886251-2897474-Oryza_sativa_Japonica	NC_029257.1	2886251	2897474	11223	Nonautonomous:Gypsy	Retand	no	GAG|Retand RH|Retand INT|Retand
NC_029257.1-3009067-3021967-Oryza_sativa_Japonica	NC_029257.1	3009067	3021967	12900	Nonautonomous:Gypsy	Retand	yes	GAG|Retand PROT|Retand RT|Retand RH|Retand INT|Retand
NC_029257.1-30240197-30251967-Oryza_sativa_Japonica	NC_029257.1	30240197	30251967	11770	Nonautonomous:Gypsy	Tekay	yes	GAG|Tekay PROT|Tekay RT|Tekay RH|Tekay INT|Tekay CHD|Tekay
NC_029257.1-30505456-30508826-Oryza_sativa_Japonica	NC_029257.1	30505456	30508826	3370	Nonautonomous:Copia	Tork	no	GAG|Tork PROT|Tork
NC_029257.1-31377033-31390116-Oryza_sativa_Japonica	NC_029257.1	31377033	31390116	13083	Nonautonomous:Gypsy	Retand	yes	GAG|Retand PROT|Retand RT|Retand RH|Retand INT|Retand
NC_029257.1-320579-331920-Oryza_sativa_Japonica	NC_029257.1	320579	331920	11341	Nonautonomous:Gypsy	Retand	yes	GAG|Retand PROT|Retand RT|Retand RH|Retand INT|Retand
NC_029257.1-32223607-32237781-Oryza_sativa_Japonica	NC_029257.1	32223607	32237781	14174	Nonautonomous:Gypsy	Tekay	yes	GAG|Tekay PROT|Tekay RT|Tekay RH|Tekay INT|Tekay CHD|Tekay
NC_029257.1-32479715-32486143-Oryza_sativa_Japonica	NC_029257.1	32479715	32486143	6428	Nonautonomous:Copia	SIRE	no	GAG|SIRE
NC_029257.1-32755489-32768336-Oryza_sativa_Japonica	NC_029257.1	32755489	32768336	12847	Nonautonomous:Gypsy	Retand	yes	GAG|Retand PROT|Retand RT|Retand RH|Retand INT|Retand
NC_029257.1-32802871-32810766-Oryza_sativa_Japonica	NC_029257.1	32802871	32810766	7895	Nonautonomous:Gypsy	Retand	no	INT|Retand
NC_029257.1-33946910-33952121-Oryza_sativa_Japonica	NC_029257.1	33946910	33952121	5211	Autonomous:Copia	Ale	yes	GAG|Ale PROT|Ale INT|Ale RT|Ale RH|Ale
NC_029257.1-34010132-34015814-Oryza_sativa_Japonica	NC_029257.1	34010132	34015814	5682	Nonautonomous:Copia	Ivana	yes	GAG|Ivana PROT|Ivana INT|Ivana RT|Ivana RH|Ivana
NC_029257.1-3433916-3439692-Oryza_sativa_Japonica	NC_029257.1	3433916	3439692	5776	Nonautonomous:Copia	Ivana	yes	GAG|Ivana PROT|Ivana INT|Ivana RT|Ivana RH|Ivana
NC_029257.1-3460420-3465914-Oryza_sativa_Japonica	NC_029257.1	3460420	3465914	5494	Nonautonomous:Copia	Ale	yes	GAG|Ale PROT|Ale INT|Ale RT|Ale RH|Ale
NC_029257.1-3804274-3812736-Oryza_sativa_Japonica	NC_029257.1	3804274	3812736	8462	Nonautonomous:Unknown	none	none	none
NC_029257.1-3897337-3908650-Oryza_sativa_Japonica	NC_029257.1	3897337	3908650	11313	Nonautonomous:Gypsy	Retand	yes	GAG|Retand PROT|Retand RT|Retand RH|Retand INT|Retand
NC_029257.1-3911174-3924054-Oryza_sativa_Japonica	NC_029257.1	3911174	3924054	12880	Nonautonomous:Gypsy	Retand	yes	GAG|Retand PROT|Retand RT|Retand RH|Retand INT|Retand
NC_029257.1-460603-465572-Oryza_sativa_Japonica	NC_029257.1	460603	465572	4969	Nonautonomous:Copia	Ale	yes	GAG|Ale PROT|Ale INT|Ale RT|Ale RH|Ale
NC_029257.1-4914212-4927012-Oryza_sativa_Japonica	NC_029257.1	4914212	4927012	12800	Nonautonomous:Gypsy	Retand	yes	GAG|Retand PROT|Retand RT|Retand RH|Retand INT|Retand
NC_029257.1-5427909-5439371-Oryza_sativa_Japonica	NC_029257.1	5427909	5439371	11462	Nonautonomous:Gypsy	Retand	yes	GAG|Retand PROT|Retand RT|Retand RH|Retand INT|Retand
NC_029257.1-6860364-6866768-Oryza_sativa_Japonica	NC_029257.1	6860364	6866768	6404	Nonautonomous:Copia	Ikeros	yes	GAG|Ikeros PROT|Ikeros INT|Ikeros RT|Ikeros RH|Ikeros
NC_029257.1-6882432-6892520-Oryza_sativa_Japonica	NC_029257.1	6882432	6892520	10088	Nonautonomous:Unknown	none	none	none
NC_029257.1-7189034-7201116-Oryza_sativa_Japonica	NC_029257.1	7189034	7201116	12082	Nonautonomous:Gypsy	Tekay	yes	GAG|Tekay PROT|Tekay RT|Tekay RH|Tekay INT|Tekay CHD|Tekay
NC_029257.1-7385272-7391021-Oryza_sativa_Japonica	NC_029257.1	7385272	7391021	5749	Nonautonomous:Copia	SIRE	no	GAG|SIRE PROT|SIRE RH|SIRE
NC_029257.1-7864672-7876570-Oryza_sativa_Japonica	NC_029257.1	7864672	7876570	11898	Nonautonomous:Unknown	none	none	none
NC_029257.1-8042263-8047763-Oryza_sativa_Japonica	NC_029257.1	8042263	8047763	5500	Autonomous:Gypsy	Reina	yes	GAG|Reina PROT|Reina RT|Reina RH|Reina INT|Reina CHD|Reina
NC_029257.1-9147425-9153548-Oryza_sativa_Japonica	NC_029257.1	9147425	9153548	6123	Nonautonomous:Copia	Ale	yes	GAG|Ale PROT|Ale INT|Ale RT|Ale RH|Ale
NC_029257.1-9401488-9407579-Oryza_sativa_Japonica	NC_029257.1	9401488	9407579	6091	Nonautonomous:Copia	Ikeros	no	GAG|Ikeros PROT|Ikeros RT|Ikeros RH|Ikeros
NC_029257.1-9914450-9920006-Oryza_sativa_Japonica	NC_029257.1	9914450	9920006	5556	Nonautonomous:Gypsy	Reina	yes	GAG|Reina PROT|Reina RT|Reina RH|Reina INT|Reina CHD|Reina
NC_029258.1-11294299-11305923-Oryza_sativa_Japonica	NC_029258.1	11294299	11305923	11624	Nonautonomous:Gypsy	Retand	yes	GAG|Retand PROT|Retand RT|Retand RH|Retand INT|Retand
NC_029258.1-11311296-11316129-Oryza_sativa_Japonica	NC_029258.1	11311296	11316129	4833	Nonautonomous:Copia	Ale	yes	GAG|Ale PROT|Ale INT|Ale RT|Ale RH|Ale
NC_029258.1-13202647-13216930-Oryza_sativa_Japonica	NC_029258.1	13202647	13216930	14283	Nonautonomous:Gypsy	Retand	no	PROT|Retand RT|Retand RH|Retand INT|Retand
NC_029258.1-13370790-13381890-Oryza_sativa_Japonica	NC_029258.1	13370790	13381890	11100	Nonautonomous:Unknown	none	none	none
NC_029258.1-13432478-13444545-Oryza_sativa_Japonica	NC_029258.1	13432478	13444545	12067	Nonautonomous:Gypsy	Tekay	yes	GAG|Tekay PROT|Tekay RT|Tekay RH|Tekay INT|Tekay CHD|Tekay
NC_029258.1-13684246-13697207-Oryza_sativa_Japonica	NC_029258.1	13684246	13697207	12961	Nonautonomous:Gypsy	Retand	yes	GAG|Retand PROT|Retand RT|Retand RH|Retand INT|Retand
NC_029258.1-13801376-13807651-Oryza_sativa_Japonica	NC_029258.1	13801376	13807651	6275	Nonautonomous:Copia	Ikeros	yes	GAG|Ikeros PROT|Ikeros INT|Ikeros RT|Ikeros RH|Ikeros
NC_029258.1-1380844-1392414-Oryza_sativa_Japonica	NC_029258.1	1380844	1392414	11570	Nonautonomous:Gypsy	Retand	yes	GAG|Retand PROT|Retand RT|Retand RH|Retand INT|Retand
NC_029258.1-14121569-14133027-Oryza_sativa_Japonica	NC_029258.1	14121569	14133027	11458	Nonautonomous:Gypsy	Retand	no	GAG|Retand PROT|Retand RT|Retand RH|Retand INT|Retand
NC_029258.1-15034249-15039177-Oryza_sativa_Japonica	NC_029258.1	15034249	15039177	4928	Nonautonomous:Copia	Ivana	yes	GAG|Ivana PROT|Ivana INT|Ivana RT|Ivana RH|Ivana
NC_029258.1-15081374-15092685-Oryza_sativa_Japonica	NC_029258.1	15081374	15092685	11311	Nonautonomous:Gypsy	Retand	yes	GAG|Retand PROT|Retand RT|Retand RH|Retand INT|Retand
NC_029258.1-16158383-16163671-Oryza_sativa_Japonica	NC_029258.1	16158383	16163671	5288	Nonautonomous:Copia	Ivana	yes	GAG|Ivana PROT|Ivana INT|Ivana RT|Ivana RH|Ivana
NC_029258.1-16345129-16357109-Oryza_sativa_Japonica	NC_029258.1	16345129	16357109	11980	Autonomous:Gypsy	Retand	no	GAG|Retand PROT|Retand RT|Retand RH|Retand INT|Retand
NC_029258.1-16516094-16527630-Oryza_sativa_Japonica	NC_029258.1	16516094	16527630	11536	Nonautonomous:Gypsy	Retand	yes	GAG|Retand PROT|Retand RT|Retand RH|Retand INT|Retand
NC_029258.1-16532323-16543037-Oryza_sativa_Japonica	NC_029258.1	16532323	16543037	10714	Nonautonomous:Gypsy	Tekay	no	GAG|Tekay
NC_029258.1-16903628-16914924-Oryza_sativa_Japonica	NC_029258.1	16903628	16914924	11296	Nonautonomous:Gypsy	Retand	yes	GAG|Retand PROT|Retand RT|Retand RH|Retand INT|Retand
NC_029258.1-17014113-17019379-Oryza_sativa_Japonica	NC_029258.1	17014113	17019379	5266	Nonautonomous:Gypsy	Reina	yes	GAG|Reina PROT|Reina RT|Reina RH|Reina INT|Reina CHD|Reina
NC_029258.1-17178041-17188998-Oryza_sativa_Japonica	NC_029258.1	17178041	17188998	10957	Nonautonomous:Gypsy	Retand	yes	GAG|Retand PROT|Retand RT|Retand RH|Retand INT|Retand
NC_029258.1-17561435-17566569-Oryza_sativa_Japonica	NC_029258.1	17561435	17566569	5134	Nonautonomous:Copia	Ivana	yes	GAG|Ivana PROT|Ivana INT|Ivana RT|Ivana RH|Ivana
NC_029258.1-17583121-17587904-Oryza_sativa_Japonica	NC_029258.1	17583121	17587904	4783	Nonautonomous:Copia	Ale	yes	GAG|Ale PROT|Ale INT|Ale RT|Ale RH|Ale
NC_029258.1-17625813-17634544-Oryza_sativa_Japonica	NC_029258.1	17625813	17634544	8731	Nonautonomous:Gypsy	Tekay	no	GAG|Tekay PROT|Tekay
NC_029258.1-17644803-17655127-Oryza_sativa_Japonica	NC_029258.1	17644803	17655127	10324	Nonautonomous:Gypsy	Retand	yes	GAG|Retand PROT|Retand RT|Retand RH|Retand INT|Retand
NC_029258.1-18379905-18387089-Oryza_sativa_Japonica	NC_029258.1	18379905	18387089	7184	Nonautonomous:Copia	Bianca	yes	GAG|Bianca PROT|Bianca INT|Bianca RT|Bianca RH|Bianca
NC_029258.1-18754523-18766048-Oryza_sativa_Japonica	NC_029258.1	18754523	18766048	11525	Nonautonomous:Gypsy	Tekay	no	GAG|Tekay
NC_029258.1-18837215-18849269-Oryza_sativa_Japonica	NC_029258.1	18837215	18849269	12054	Nonautonomous:Gypsy	Tekay	yes	GAG|Tekay PROT|Tekay RT|Tekay RH|Tekay INT|Tekay CHD|Tekay
NC_029258.1-18907996-18917913-Oryza_sativa_Japonica	NC_029258.1	18907996	18917913	9917	Nonautonomous:Unknown	none	none	none
NC_029258.1-19267136-19276992-Oryza_sativa_Japonica	NC_029258.1	19267136	19276992	9856	Nonautonomous:Gypsy	Retand	no	GAG|Retand PROT|Retand RH|Retand INT|Retand
NC_029258.1-19718432-19726260-Oryza_sativa_Japonica	NC_029258.1	19718432	19726260	7828	Nonautonomous:Gypsy	Retand	no	GAG|Retand
NC_029258.1-20275927-20289124-Oryza_sativa_Japonica	NC_029258.1	20275927	20289124	13197	Nonautonomous:Gypsy	Ogre	yes	GAG|Ogre PROT|Ogre RT|Ogre RH|Ogre INT|Ogre
NC_029258.1-20300447-20305308-Oryza_sativa_Japonica	NC_029258.1	20300447	20305308	4861	Nonautonomous:Copia	Ale	yes	GAG|Ale PROT|Ale INT|Ale RT|Ale RH|Ale
NC_029258.1-20346852-20352738-Oryza_sativa_Japonica	NC_029258.1	20346852	20352738	5886	Nonautonomous:Copia	Ale	yes	GAG|Ale PROT|Ale INT|Ale RT|Ale RH|Ale
NC_029258.1-21323170-21334285-Oryza_sativa_Japonica	NC_029258.1	21323170	21334285	11115	Nonautonomous:Gypsy	Ogre	no	GAG|Ogre RH|Ogre INT|Ogre
NC_029258.1-21973675-21984807-Oryza_sativa_Japonica	NC_029258.1	21973675	21984807	11132	Nonautonomous:Gypsy	Retand	no	GAG|Retand PROT|Retand RT|Retand INT|Retand
NC_029258.1-22554340-22566339-Oryza_sativa_Japonica	NC_029258.1	22554340	22566339	11999	Nonautonomous:Gypsy	Retand	yes	GAG|Retand PROT|Retand RT|Retand RH|Retand INT|Retand
NC_029258.1-22764903-22775789-Oryza_sativa_Japonica	NC_029258.1	22764903	22775789	10886	Nonautonomous:Gypsy	Retand	yes	GAG|Retand PROT|Retand RT|Retand RH|Retand INT|Retand
NC_029258.1-24075577-24084859-Oryza_sativa_Japonica	NC_029258.1	24075577	24084859	9282	Nonautonomous:Gypsy	Tekay	yes	GAG|Tekay PROT|Tekay RT|Tekay RH|Tekay INT|Tekay CHD|Tekay
NC_029258.1-24858207-24863028-Oryza_sativa_Japonica	NC_029258.1	24858207	24863028	4821	Nonautonomous:Copia	Ale	yes	GAG|Ale PROT|Ale INT|Ale RT|Ale RH|Ale
NC_029258.1-2615594-2626431-Oryza_sativa_Japonica	NC_029258.1	2615594	2626431	10837	Nonautonomous:Gypsy	Reina	no	CHD|Reina PROT|Reina RT|Reina RH|Reina INT|Reina GAG|Reina
NC_029258.1-27744814-27756303-Oryza_sativa_Japonica	NC_029258.1	27744814	27756303	11489	Nonautonomous:Gypsy	Retand	yes	GAG|Retand PROT|Retand RT|Retand RH|Retand INT|Retand
NC_029258.1-29389040-29394475-Oryza_sativa_Japonica	NC_029258.1	29389040	29394475	5435	Nonautonomous:Gypsy	Retand	no	GAG|Retand INT|Retand RH|Retand
NC_029258.1-29687430-29700346-Oryza_sativa_Japonica	NC_029258.1	29687430	29700346	12916	Nonautonomous:Gypsy	Retand	yes	GAG|Retand PROT|Retand RT|Retand RH|Retand INT|Retand
NC_029258.1-30130354-30136782-Oryza_sativa_Japonica	NC_029258.1	30130354	30136782	6428	Nonautonomous:Gypsy	Retand	no	INT|Retand
NC_029258.1-3055428-3064555-Oryza_sativa_Japonica	NC_029258.1	3055428	3064555	9127	Nonautonomous:Gypsy	Reina	yes	GAG|Reina PROT|Reina RT|Reina RH|Reina INT|Reina CHD|Reina
NC_029258.1-30859380-30872257-Oryza_sativa_Japonica	NC_029258.1	30859380	30872257	12877	Nonautonomous:Gypsy	Retand	yes	GAG|Retand PROT|Retand RT|Retand RH|Retand INT|Retand
NC_029258.1-32201338-32207015-Oryza_sativa_Japonica	NC_029258.1	32201338	32207015	5677	Nonautonomous:Copia	Ivana	yes	GAG|Ivana PROT|Ivana INT|Ivana RT|Ivana RH|Ivana
NC_029258.1-32460085-32469355-Oryza_sativa_Japonica	NC_029258.1	32460085	32469355	9270	Nonautonomous:Copia	Ale	yes	GAG|Ale PROT|Ale INT|Ale RT|Ale RH|Ale
NC_029258.1-32719260-32730587-Oryza_sativa_Japonica	NC_029258.1	32719260	32730587	11327	Nonautonomous:Gypsy	Retand	no	GAG|Retand PROT|Retand RT|Retand INT|Retand
NC_029258.1-32761440-32774383-Oryza_sativa_Japonica	NC_029258.1	32761440	32774383	12943	Nonautonomous:Gypsy	Retand	yes	GAG|Retand PROT|Retand RT|Retand RH|Retand INT|Retand
NC_029258.1-3289785-3294667-Oryza_sativa_Japonica	NC_029258.1	3289785	3294667	4882	Nonautonomous:Copia	Ale	yes	GAG|Ale PROT|Ale INT|Ale RT|Ale RH|Ale
NC_029258.1-33444938-33451050-Oryza_sativa_Japonica	NC_029258.1	33444938	33451050	6112	Nonautonomous:Copia	Ikeros	no	GAG|Ikeros PROT|Ikeros RT|Ikeros RH|Ikeros
NC_029258.1-33702004-33707273-Oryza_sativa_Japonica	NC_029258.1	33702004	33707273	5269	Autonomous:Copia	Ale	yes	GAG|Ale PROT|Ale INT|Ale RT|Ale RH|Ale
NC_029258.1-33816299-33829157-Oryza_sativa_Japonica	NC_029258.1	33816299	33829157	12858	Autonomous:Gypsy	Retand	yes	GAG|Retand PROT|Retand RT|Retand RH|Retand INT|Retand
NC_029258.1-33863665-33876584-Oryza_sativa_Japonica	NC_029258.1	33863665	33876584	12919	Nonautonomous:Gypsy	Retand	yes	GAG|Retand PROT|Retand RT|Retand RH|Retand INT|Retand
NC_029258.1-34743297-34754985-Oryza_sativa_Japonica	NC_029258.1	34743297	34754985	11688	Nonautonomous:Gypsy	Reina	no	RT|Reina RH|Reina GAG|SIRE PROT|SIRE INT|Reina CHD|Reina
NC_029258.1-34947483-34952494-Oryza_sativa_Japonica	NC_029258.1	34947483	34952494	5011	Nonautonomous:Copia	Ivana	yes	GAG|Ivana PROT|Ivana INT|Ivana RT|Ivana RH|Ivana
NC_029258.1-35094075-35098869-Oryza_sativa_Japonica	NC_029258.1	35094075	35098869	4794	Nonautonomous:Copia	Ale	yes	GAG|Ale PROT|Ale INT|Ale RT|Ale RH|Ale
NC_029258.1-35927057-35939938-Oryza_sativa_Japonica	NC_029258.1	35927057	35939938	12881	Nonautonomous:Gypsy	Retand	yes	GAG|Retand PROT|Retand RT|Retand RH|Retand INT|Retand
NC_029258.1-36050573-36061986-Oryza_sativa_Japonica	NC_029258.1	36050573	36061986	11413	Nonautonomous:Gypsy	Retand	yes	GAG|Retand PROT|Retand RT|Retand RH|Retand INT|Retand
NC_029258.1-36207325-36212090-Oryza_sativa_Japonica	NC_029258.1	36207325	36212090	4765	Nonautonomous:Copia	Ale	yes	GAG|Ale PROT|Ale INT|Ale RT|Ale RH|Ale
NC_029258.1-5003017-5009198-Oryza_sativa_Japonica	NC_029258.1	5003017	5009198	6181	Nonautonomous:Gypsy	Reina	yes	GAG|Reina PROT|Reina RT|Reina RH|Reina INT|Reina CHD|Reina
NC_029258.1-6685431-6697334-Oryza_sativa_Japonica	NC_029258.1	6685431	6697334	11903	Nonautonomous:Copia	SIRE	yes	GAG|SIRE PROT|SIRE INT|SIRE RT|SIRE RH|SIRE
NC_029258.1-7409470-7415858-Oryza_sativa_Japonica	NC_029258.1	7409470	7415858	6388	Nonautonomous:Copia	Ikeros	yes	GAG|Ikeros PROT|Ikeros INT|Ikeros RT|Ikeros RH|Ikeros
NC_029258.1-7533843-7546957-Oryza_sativa_Japonica	NC_029258.1	7533843	7546957	13114	Nonautonomous:Gypsy	Retand	yes	GAG|Retand PROT|Retand RT|Retand RH|Retand INT|Retand
NC_029258.1-8019908-8031358-Oryza_sativa_Japonica	NC_029258.1	8019908	8031358	11450	Nonautonomous:Gypsy	Retand	yes	GAG|Retand PROT|Retand RT|Retand RH|Retand INT|Retand
NC_029258.1-8609631-8622790-Oryza_sativa_Japonica	NC_029258.1	8609631	8622790	13159	Autonomous:Gypsy	Retand	yes	GAG|Retand PROT|Retand RT|Retand RH|Retand INT|Retand
NC_029258.1-8923979-8929483-Oryza_sativa_Japonica	NC_029258.1	8923979	8929483	5504	Nonautonomous:Gypsy	Retand	no	GAG|Retand INT|Retand RH|Retand
NC_029258.1-9098314-9104856-Oryza_sativa_Japonica	NC_029258.1	9098314	9104856	6542	Nonautonomous:Gypsy	Retand	no	GAG|Retand PROT|Retand RT|Retand RH|Retand
NC_029258.1-9181443-9187605-Oryza_sativa_Japonica	NC_029258.1	9181443	9187605	6162	Nonautonomous:Copia	Ikeros	no	GAG|Ikeros PROT|Ikeros RT|Ikeros RH|Ikeros
NC_029259.1-10093471-10104966-Oryza_sativa_Japonica	NC_029259.1	10093471	10104966	11495	Nonautonomous:Unknown	none	none	none
NC_029259.1-10164651-10177806-Oryza_sativa_Japonica	NC_029259.1	10164651	10177806	13155	Nonautonomous:Gypsy	Retand	yes	GAG|Retand PROT|Retand RT|Retand RH|Retand INT|Retand
NC_029259.1-10251923-10256697-Oryza_sativa_Japonica	NC_029259.1	10251923	10256697	4774	Nonautonomous:Gypsy	Reina	yes	GAG|Reina PROT|Reina RT|Reina RH|Reina INT|Reina CHD|Reina
NC_029259.1-10711596-10723676-Oryza_sativa_Japonica	NC_029259.1	10711596	10723676	12080	Nonautonomous:Gypsy	Tekay	yes	GAG|Tekay PROT|Tekay RT|Tekay RH|Tekay INT|Tekay CHD|Tekay
NC_029259.1-11038029-11051048-Oryza_sativa_Japonica	NC_029259.1	11038029	11051048	13019	Nonautonomous:Gypsy	Retand	yes	GAG|Retand PROT|Retand RT|Retand RH|Retand INT|Retand
NC_029259.1-11095599-11105605-Oryza_sativa_Japonica	NC_029259.1	11095599	11105605	10006	Nonautonomous:Gypsy	Retand	no	GAG|Retand RT|Retand RH|Retand INT|Retand
NC_029259.1-11139227-11148914-Oryza_sativa_Japonica	NC_029259.1	11139227	11148914	9687	Nonautonomous:Copia	Ikeros	yes	GAG|Ikeros PROT|Ikeros INT|Ikeros RT|Ikeros RH|Ikeros
NC_029259.1-12083279-12094619-Oryza_sativa_Japonica	NC_029259.1	12083279	12094619	11340	Nonautonomous:Gypsy	Retand	no	GAG|Retand PROT|Retand RT|Retand RH|Retand INT|Retand
NC_029259.1-12181786-12193432-Oryza_sativa_Japonica	NC_029259.1	12181786	12193432	11646	Nonautonomous:Gypsy	Tekay	yes	GAG|Tekay PROT|Tekay RT|Tekay RH|Tekay INT|Tekay CHD|Tekay
NC_029259.1-12205373-12210959-Oryza_sativa_Japonica	NC_029259.1	12205373	12210959	5586	Nonautonomous:Gypsy	Reina	yes	GAG|Reina PROT|Reina RT|Reina RH|Reina INT|Reina CHD|Reina
NC_029259.1-12260711-12273535-Oryza_sativa_Japonica	NC_029259.1	12260711	12273535	12824	Nonautonomous:Gypsy	Retand	yes	GAG|Retand PROT|Retand RT|Retand RH|Retand INT|Retand
NC_029259.1-12489599-12495135-Oryza_sativa_Japonica	NC_029259.1	12489599	12495135	5536	Nonautonomous:Gypsy	Reina	yes	GAG|Reina PROT|Reina RT|Reina RH|Reina INT|Reina CHD|Reina
NC_029259.1-12696613-12701779-Oryza_sativa_Japonica	NC_029259.1	12696613	12701779	5166	Nonautonomous:Copia	Ivana	yes	GAG|Ivana PROT|Ivana INT|Ivana RT|Ivana RH|Ivana
NC_029259.1-13296065-13307402-Oryza_sativa_Japonica	NC_029259.1	13296065	13307402	11337	Nonautonomous:Gypsy	Retand	yes	GAG|Retand PROT|Retand RT|Retand RH|Retand INT|Retand
NC_029259.1-13322874-13332126-Oryza_sativa_Japonica	NC_029259.1	13322874	13332126	9252	Nonautonomous:Copia	SIRE	yes	GAG|SIRE PROT|SIRE INT|SIRE RT|SIRE RH|SIRE
NC_029259.1-13594373-13605221-Oryza_sativa_Japonica	NC_029259.1	13594373	13605221	10848	Nonautonomous:Gypsy	Retand	yes	GAG|Retand PROT|Retand RT|Retand RH|Retand INT|Retand
NC_029259.1-13627841-13640763-Oryza_sativa_Japonica	NC_029259.1	13627841	13640763	12922	Nonautonomous:Gypsy	Retand	yes	GAG|Retand PROT|Retand RT|Retand RH|Retand INT|Retand
NC_029259.1-13736526-13749034-Oryza_sativa_Japonica	NC_029259.1	13736526	13749034	12508	Nonautonomous:Gypsy	Tekay	yes	GAG|Tekay PROT|Tekay RT|Tekay RH|Tekay INT|Tekay CHD|Tekay
NC_029259.1-13974602-13982331-Oryza_sativa_Japonica	NC_029259.1	13974602	13982331	7729	Nonautonomous:Gypsy	CRM	yes	CHDCR|CRM GAG|CRM PROT|CRM RT|CRM RH|CRM INT|CRM
NC_029259.1-14107452-14112680-Oryza_sativa_Japonica	NC_029259.1	14107452	14112680	5228	Nonautonomous:Copia	Ivana	yes	GAG|Ivana PROT|Ivana INT|Ivana RT|Ivana RH|Ivana
NC_029259.1-14116054-14127377-Oryza_sativa_Japonica	NC_029259.1	14116054	14127377	11323	Nonautonomous:Gypsy	Retand	yes	GAG|Retand PROT|Retand RT|Retand RH|Retand INT|Retand
NC_029259.1-14139988-14152914-Oryza_sativa_Japonica	NC_029259.1	14139988	14152914	12926	Nonautonomous:Gypsy	Retand	yes	GAG|Retand PROT|Retand RT|Retand RH|Retand INT|Retand
NC_029259.1-14397991-14409065-Oryza_sativa_Japonica	NC_029259.1	14397991	14409065	11074	Nonautonomous:Gypsy	Tekay	no	GAG|Tekay
NC_029259.1-14945072-14950681-Oryza_sativa_Japonica	NC_029259.1	14945072	14950681	5609	Nonautonomous:Gypsy	Reina	yes	GAG|Reina PROT|Reina RT|Reina RH|Reina INT|Reina CHD|Reina
NC_029259.1-1595576-1604725-Oryza_sativa_Japonica	NC_029259.1	1595576	1604725	9149	Nonautonomous:Gypsy	Ogre	no	GAG|Ogre PROT|Ogre RT|Ogre RH|Ogre
NC_029259.1-16083664-16096516-Oryza_sativa_Japonica	NC_029259.1	16083664	16096516	12852	Nonautonomous:Gypsy	Retand	yes	GAG|Retand PROT|Retand RT|Retand RH|Retand INT|Retand
NC_029259.1-1687050-1697505-Oryza_sativa_Japonica	NC_029259.1	1687050	1697505	10455	Nonautonomous:Gypsy	Retand	yes	GAG|Retand PROT|Retand RT|Retand RH|Retand INT|Retand
NC_029259.1-17118458-17129783-Oryza_sativa_Japonica	NC_029259.1	17118458	17129783	11325	Nonautonomous:Gypsy	Retand	yes	GAG|Retand PROT|Retand RT|Retand RH|Retand INT|Retand
NC_029259.1-17455908-17460998-Oryza_sativa_Japonica	NC_029259.1	17455908	17460998	5090	Nonautonomous:Copia	Ivana	yes	GAG|Ivana PROT|Ivana INT|Ivana RT|Ivana RH|Ivana
NC_029259.1-17642984-17653502-Oryza_sativa_Japonica	NC_029259.1	17642984	17653502	10518	Nonautonomous:Gypsy	Retand	no	GAG|Retand PROT|Retand RT|Retand RH|Retand INT|Retand
NC_029259.1-1795067-1806380-Oryza_sativa_Japonica	NC_029259.1	1795067	1806380	11313	Nonautonomous:Gypsy	Retand	yes	GAG|Retand PROT|Retand RT|Retand RH|Retand INT|Retand
NC_029259.1-18302600-18311862-Oryza_sativa_Japonica	NC_029259.1	18302600	18311862	9262	Nonautonomous:Copia	SIRE	yes	GAG|SIRE PROT|SIRE INT|SIRE RT|SIRE RH|SIRE
NC_029259.1-19065732-19078931-Oryza_sativa_Japonica	NC_029259.1	19065732	19078931	13199	Nonautonomous:Gypsy	Retand	yes	GAG|Retand PROT|Retand RT|Retand RH|Retand INT|Retand
NC_029259.1-19722391-19734933-Oryza_sativa_Japonica	NC_029259.1	19722391	19734933	12542	Nonautonomous:Gypsy	Retand	yes	GAG|Retand PROT|Retand RT|Retand RH|Retand INT|Retand
NC_029259.1-19744870-19756801-Oryza_sativa_Japonica	NC_029259.1	19744870	19756801	11931	Nonautonomous:Copia	SIRE	yes	GAG|SIRE PROT|SIRE INT|SIRE RT|SIRE RH|SIRE
NC_029259.1-19760563-19769914-Oryza_sativa_Japonica	NC_029259.1	19760563	19769914	9351	Nonautonomous:Gypsy	Reina	yes	GAG|Reina PROT|Reina RT|Reina RH|Reina INT|Reina CHD|Reina
NC_029259.1-20799867-20809948-Oryza_sativa_Japonica	NC_029259.1	20799867	20809948	10081	Nonautonomous:Gypsy	Tekay	yes	GAG|Tekay PROT|Tekay RT|Tekay RH|Tekay INT|Tekay CHD|Tekay
NC_029259.1-2136210-2147867-Oryza_sativa_Japonica	NC_029259.1	2136210	2147867	11657	Nonautonomous:Gypsy	Tekay	yes	GAG|Tekay PROT|Tekay RT|Tekay RH|Tekay INT|Tekay CHD|Tekay
NC_029259.1-21478083-21491263-Oryza_sativa_Japonica	NC_029259.1	21478083	21491263	13180	Nonautonomous:Gypsy	Retand	yes	GAG|Retand PROT|Retand RT|Retand RH|Retand INT|Retand
NC_029259.1-2181770-2197977-Oryza_sativa_Japonica	NC_029259.1	2181770	2197977	16207	Nonautonomous:Gypsy	Tekay	yes	GAG|Tekay PROT|Tekay RT|Tekay RH|Tekay INT|Tekay CHD|Tekay
NC_029259.1-22066810-22073680-Oryza_sativa_Japonica	NC_029259.1	22066810	22073680	6870	Nonautonomous:Copia	Bianca	yes	GAG|Bianca PROT|Bianca INT|Bianca RT|Bianca RH|Bianca
NC_029259.1-22491559-22503070-Oryza_sativa_Japonica	NC_029259.1	22491559	22503070	11511	Nonautonomous:Gypsy	Tekay	yes	GAG|Tekay PROT|Tekay RT|Tekay RH|Tekay INT|Tekay CHD|Tekay
NC_029259.1-2258182-2264151-Oryza_sativa_Japonica	NC_029259.1	2258182	2264151	5969	Nonautonomous:Gypsy	Reina	yes	GAG|Reina PROT|Reina RT|Reina RH|Reina INT|Reina CHD|Reina
NC_029259.1-2339295-2350184-Oryza_sativa_Japonica	NC_029259.1	2339295	2350184	10889	Nonautonomous:Gypsy	Tekay	no	GAG|Tekay
NC_029259.1-23444479-23457370-Oryza_sativa_Japonica	NC_029259.1	23444479	23457370	12891	Nonautonomous:Gypsy	Retand	yes	GAG|Retand PROT|Retand RT|Retand RH|Retand INT|Retand
NC_029259.1-23675081-23682811-Oryza_sativa_Japonica	NC_029259.1	23675081	23682811	7730	Nonautonomous:Gypsy	CRM	yes	GAG|CRM PROT|CRM RT|CRM RH|CRM INT|CRM CHDCR|CRM
NC_029259.1-2374134-2384796-Oryza_sativa_Japonica	NC_029259.1	2374134	2384796	10662	Nonautonomous:Gypsy	Retand	no	PROT|Retand RT|Retand RH|Retand INT|Retand
NC_029259.1-23799599-23812526-Oryza_sativa_Japonica	NC_029259.1	23799599	23812526	12927	Autonomous:Gypsy	Retand	yes	GAG|Retand PROT|Retand RT|Retand RH|Retand INT|Retand
NC_029259.1-25286392-25295700-Oryza_sativa_Japonica	NC_029259.1	25286392	25295700	9308	Nonautonomous:Copia	SIRE	yes	GAG|SIRE PROT|SIRE INT|SIRE RT|SIRE RH|SIRE
NC_029259.1-2550092-2560498-Oryza_sativa_Japonica	NC_029259.1	2550092	2560498	10406	Nonautonomous:Gypsy	Tekay	no	GAG|Tekay
NC_029259.1-2618947-2628999-Oryza_sativa_Japonica	NC_029259.1	2618947	2628999	10052	Nonautonomous:Gypsy	Tekay	no	GAG|Tekay
NC_029259.1-26325207-26339517-Oryza_sativa_Japonica	NC_029259.1	26325207	26339517	14310	Nonautonomous:Gypsy	Retand	yes	GAG|Retand PROT|Retand RT|Retand RH|Retand INT|Retand
NC_029259.1-26597546-26610352-Oryza_sativa_Japonica	NC_029259.1	26597546	26610352	12806	Nonautonomous:Gypsy	Retand	yes	GAG|Retand PROT|Retand RT|Retand RH|Retand INT|Retand
NC_029259.1-26820754-26830309-Oryza_sativa_Japonica	NC_029259.1	26820754	26830309	9555	Autonomous:Gypsy	Reina	yes	GAG|Reina PROT|Reina RT|Reina RH|Reina INT|Reina CHD|Reina
NC_029259.1-26939200-26952347-Oryza_sativa_Japonica	NC_029259.1	26939200	26952347	13147	Nonautonomous:Gypsy	Retand	yes	GAG|Retand PROT|Retand RT|Retand RH|Retand INT|Retand
NC_029259.1-27084115-27097086-Oryza_sativa_Japonica	NC_029259.1	27084115	27097086	12971	Nonautonomous:Gypsy	Retand	yes	GAG|Retand PROT|Retand RT|Retand RH|Retand INT|Retand
NC_029259.1-27961685-27975756-Oryza_sativa_Japonica	NC_029259.1	27961685	27975756	14071	Nonautonomous:Gypsy	Tekay	yes	GAG|Tekay PROT|Tekay RT|Tekay RH|Tekay INT|Tekay CHD|Tekay
NC_029259.1-28656632-28661033-Oryza_sativa_Japonica	NC_029259.1	28656632	28661033	4401	Nonautonomous:Copia	Ale	no	PROT|Ale INT|Ale RT|Ale RH|Ale
NC_029259.1-2895048-2906383-Oryza_sativa_Japonica	NC_029259.1	2895048	2906383	11335	Nonautonomous:Gypsy	Retand	yes	GAG|Retand PROT|Retand RT|Retand RH|Retand INT|Retand
NC_029259.1-29167623-29178943-Oryza_sativa_Japonica	NC_029259.1	29167623	29178943	11320	Nonautonomous:Gypsy	Retand	yes	GAG|Retand PROT|Retand RT|Retand RH|Retand INT|Retand
NC_029259.1-29266809-29273128-Oryza_sativa_Japonica	NC_029259.1	29266809	29273128	6319	Nonautonomous:Copia	Ikeros	yes	GAG|Ikeros PROT|Ikeros INT|Ikeros RT|Ikeros RH|Ikeros
NC_029259.1-29404-41464-Oryza_sativa_Japonica	NC_029259.1	29404	41464	12060	Nonautonomous:Gypsy	Tekay	yes	GAG|Tekay PROT|Tekay RT|Tekay RH|Tekay INT|Tekay CHD|Tekay
NC_029259.1-29418682-29423874-Oryza_sativa_Japonica	NC_029259.1	29418682	29423874	5192	Nonautonomous:Copia	Ivana	yes	GAG|Ivana PROT|Ivana INT|Ivana RT|Ivana RH|Ivana
NC_029259.1-29897728-29919636-Oryza_sativa_Japonica	NC_029259.1	29897728	29919636	21908	Nonautonomous:Gypsy	Retand	no	GAG|Tekay INT|Retand RH|Retand RT|Retand PROT|Retand
NC_029259.1-30457203-30463445-Oryza_sativa_Japonica	NC_029259.1	30457203	30463445	6242	Nonautonomous:Gypsy	Reina	yes	GAG|Reina PROT|Reina RT|Reina RH|Reina INT|Reina CHD|Reina
NC_029259.1-31588769-31593496-Oryza_sativa_Japonica	NC_029259.1	31588769	31593496	4727	Nonautonomous:BARE-2	Ale	no	PROT|Ale INT|Ale RT|Ale RH|Ale
NC_029259.1-31941887-31955891-Oryza_sativa_Japonica	NC_029259.1	31941887	31955891	14004	Nonautonomous:Gypsy	Tekay	yes	GAG|Tekay PROT|Tekay RT|Tekay RH|Tekay INT|Tekay CHD|Tekay
NC_029259.1-32025567-32032020-Oryza_sativa_Japonica	NC_029259.1	32025567	32032020	6453	Nonautonomous:Copia	Ikeros	yes	GAG|Ikeros PROT|Ikeros INT|Ikeros RT|Ikeros RH|Ikeros
NC_029259.1-32051679-32058128-Oryza_sativa_Japonica	NC_029259.1	32051679	32058128	6449	Nonautonomous:Copia	Ikeros	yes	GAG|Ikeros PROT|Ikeros INT|Ikeros RT|Ikeros RH|Ikeros
NC_029259.1-32105147-32126986-Oryza_sativa_Japonica	NC_029259.1	32105147	32126986	21839	Nonautonomous:Gypsy	Tekay	yes	GAG|Tekay PROT|Tekay RT|Tekay RH|Tekay INT|Tekay CHD|Tekay
NC_029259.1-32109115-32120785-Oryza_sativa_Japonica	NC_029259.1	32109115	32120785	11670	Nonautonomous:Gypsy	Tekay	yes	GAG|Tekay PROT|Tekay RT|Tekay RH|Tekay INT|Tekay CHD|Tekay
NC_029259.1-32259125-32272468-Oryza_sativa_Japonica	NC_029259.1	32259125	32272468	13343	Nonautonomous:Gypsy	Retand	no	GAG|Retand RH|Retand INT|Retand
NC_029259.1-32394369-32399553-Oryza_sativa_Japonica	NC_029259.1	32394369	32399553	5184	Nonautonomous:Copia	Ivana	yes	GAG|Ivana PROT|Ivana INT|Ivana RT|Ivana RH|Ivana
NC_029259.1-32503015-32515896-Oryza_sativa_Japonica	NC_029259.1	32503015	32515896	12881	Nonautonomous:Gypsy	Retand	yes	GAG|Retand PROT|Retand RT|Retand RH|Retand INT|Retand
NC_029259.1-32708868-32722951-Oryza_sativa_Japonica	NC_029259.1	32708868	32722951	14083	Nonautonomous:Gypsy	Tekay	yes	GAG|Tekay PROT|Tekay RT|Tekay RH|Tekay INT|Tekay CHD|Tekay
NC_029259.1-32780732-32785740-Oryza_sativa_Japonica	NC_029259.1	32780732	32785740	5008	Nonautonomous:Copia	Tork	yes	GAG|Tork PROT|Tork INT|Tork RT|Tork RH|Tork
NC_029259.1-32901592-32913082-Oryza_sativa_Japonica	NC_029259.1	32901592	32913082	11490	Nonautonomous:Gypsy	Tekay	yes	GAG|Tekay PROT|Tekay RT|Tekay RH|Tekay INT|Tekay CHD|Tekay
NC_029259.1-33032821-33045926-Oryza_sativa_Japonica	NC_029259.1	33032821	33045926	13105	Nonautonomous:Gypsy	Retand	yes	GAG|Retand PROT|Retand RT|Retand RH|Retand INT|Retand
NC_029259.1-3380233-3390751-Oryza_sativa_Japonica	NC_029259.1	3380233	3390751	10518	Nonautonomous:Gypsy	Tekay	no	GAG|Tekay
NC_029259.1-34007634-34013670-Oryza_sativa_Japonica	NC_029259.1	34007634	34013670	6036	Nonautonomous:Gypsy	Reina	yes	GAG|Reina PROT|Reina RT|Reina RH|Reina INT|Reina CHD|Reina
NC_029259.1-34177127-34190032-Oryza_sativa_Japonica	NC_029259.1	34177127	34190032	12905	Autonomous:Gypsy	Retand	yes	GAG|Retand PROT|Retand RT|Retand RH|Retand INT|Retand
NC_029259.1-34254762-34265080-Oryza_sativa_Japonica	NC_029259.1	34254762	34265080	10318	Nonautonomous:Copia	SIRE	yes	GAG|SIRE PROT|SIRE INT|SIRE RT|SIRE RH|SIRE
NC_029259.1-3476108-3489086-Oryza_sativa_Japonica	NC_029259.1	3476108	3489086	12978	Nonautonomous:Gypsy	Retand	yes	GAG|Retand PROT|Retand RT|Retand RH|Retand INT|Retand
NC_029259.1-34764450-34775911-Oryza_sativa_Japonica	NC_029259.1	34764450	34775911	11461	Nonautonomous:Gypsy	Retand	no	GAG|Retand PROT|Retand RT|Retand INT|Retand
NC_029259.1-34853449-34858970-Oryza_sativa_Japonica	NC_029259.1	34853449	34858970	5521	Nonautonomous:Gypsy	Reina	yes	GAG|Reina PROT|Reina RT|Reina RH|Reina INT|Reina CHD|Reina
NC_029259.1-35224951-35230397-Oryza_sativa_Japonica	NC_029259.1	35224951	35230397	5446	Nonautonomous:Gypsy	Retand	no	GAG|Retand INT|Retand RH|Retand
NC_029259.1-3869892-3881202-Oryza_sativa_Japonica	NC_029259.1	3869892	3881202	11310	Nonautonomous:Gypsy	Retand	yes	GAG|Retand PROT|Retand RT|Retand RH|Retand INT|Retand
NC_029259.1-3907008-3929839-Oryza_sativa_Japonica	NC_029259.1	3907008	3929839	22831	Nonautonomous:Gypsy	Tekay	yes	GAG|Tekay PROT|Tekay RT|Tekay RH|Tekay INT|Tekay CHD|Tekay
NC_029259.1-4057887-4081976-Oryza_sativa_Japonica	NC_029259.1	4057887	4081976	24089	Nonautonomous:Gypsy	Tekay	no	GAG|Tekay RT|Tekay RH|Tekay INT|Tekay PROT|Tekay CHD|Tekay
NC_029259.1-417527-430388-Oryza_sativa_Japonica	NC_029259.1	417527	430388	12861	Nonautonomous:Gypsy	Retand	yes	GAG|Retand PROT|Retand RT|Retand RH|Retand INT|Retand
NC_029259.1-4362289-4368749-Oryza_sativa_Japonica	NC_029259.1	4362289	4368749	6460	Nonautonomous:Copia	Ikeros	yes	GAG|Ikeros PROT|Ikeros INT|Ikeros RT|Ikeros RH|Ikeros
NC_029259.1-4527458-4540422-Oryza_sativa_Japonica	NC_029259.1	4527458	4540422	12964	Nonautonomous:Gypsy	Retand	no	GAG|Retand PROT|Retand RT|Retand RH|Retand INT|Retand
NC_029259.1-4976647-4990211-Oryza_sativa_Japonica	NC_029259.1	4976647	4990211	13564	Nonautonomous:Gypsy	Ogre	yes	GAG|Ogre PROT|Ogre RT|Ogre RH|Ogre INT|Ogre
NC_029259.1-5076296-5088599-Oryza_sativa_Japonica	NC_029259.1	5076296	5088599	12303	Nonautonomous:Gypsy	Tekay	yes	GAG|Tekay PROT|Tekay RT|Tekay RH|Tekay INT|Tekay CHD|Tekay
NC_029259.1-5272770-5288139-Oryza_sativa_Japonica	NC_029259.1	5272770	5288139	15369	Nonautonomous:Gypsy	Retand	yes	GAG|Retand PROT|Retand RT|Retand RH|Retand INT|Retand
NC_029259.1-5447108-5459194-Oryza_sativa_Japonica	NC_029259.1	5447108	5459194	12086	Nonautonomous:Gypsy	Tekay	yes	GAG|Tekay PROT|Tekay RT|Tekay RH|Tekay INT|Tekay CHD|Tekay
NC_029259.1-5546033-5558762-Oryza_sativa_Japonica	NC_029259.1	5546033	5558762	12729	Nonautonomous:Gypsy	Retand	yes	GAG|Retand PROT|Retand RT|Retand RH|Retand INT|Retand
NC_029259.1-5878943-5890254-Oryza_sativa_Japonica	NC_029259.1	5878943	5890254	11311	Nonautonomous:Gypsy	Retand	yes	GAG|Retand PROT|Retand RT|Retand RH|Retand INT|Retand
NC_029259.1-6027790-6039293-Oryza_sativa_Japonica	NC_029259.1	6027790	6039293	11503	Nonautonomous:Gypsy	Retand	yes	GAG|Retand PROT|Retand RT|Retand RH|Retand INT|Retand
NC_029259.1-6193741-6198999-Oryza_sativa_Japonica	NC_029259.1	6193741	6198999	5258	Nonautonomous:Gypsy	Reina	yes	GAG|Reina PROT|Reina RT|Reina RH|Reina INT|Reina CHD|Reina
NC_029259.1-6351754-6363447-Oryza_sativa_Japonica	NC_029259.1	6351754	6363447	11693	Nonautonomous:Gypsy	Retand	yes	GAG|Retand PROT|Retand RT|Retand RH|Retand INT|Retand
NC_029259.1-6677511-6682376-Oryza_sativa_Japonica	NC_029259.1	6677511	6682376	4865	Nonautonomous:Copia	Tork	yes	GAG|Tork PROT|Tork INT|Tork RT|Tork RH|Tork
NC_029259.1-7178814-7190161-Oryza_sativa_Japonica	NC_029259.1	7178814	7190161	11347	Nonautonomous:Gypsy	Retand	yes	GAG|Retand PROT|Retand RT|Retand RH|Retand INT|Retand
NC_029259.1-7405841-7415901-Oryza_sativa_Japonica	NC_029259.1	7405841	7415901	10060	Nonautonomous:Gypsy	Tekay	no	GAG|Tekay
NC_029259.1-7652420-7662449-Oryza_sativa_Japonica	NC_029259.1	7652420	7662449	10029	Nonautonomous:Gypsy	Tekay	no	GAG|Tekay
NC_029259.1-7705171-7728351-Oryza_sativa_Japonica	NC_029259.1	7705171	7728351	23180	Nonautonomous:Gypsy	Tekay	yes	GAG|Tekay PROT|Tekay RT|Tekay RH|Tekay INT|Tekay CHD|Tekay
NC_029259.1-7713810-7724914-Oryza_sativa_Japonica	NC_029259.1	7713810	7724914	11104	Nonautonomous:Unknown	none	none	none
NC_029259.1-7836697-7847410-Oryza_sativa_Japonica	NC_029259.1	7836697	7847410	10713	Nonautonomous:Unknown	none	none	none
NC_029259.1-8025331-8031327-Oryza_sativa_Japonica	NC_029259.1	8025331	8031327	5996	Nonautonomous:Copia	Ikeros	no	GAG|Ikeros PROT|Ikeros RT|Ikeros RH|Ikeros
NC_029259.1-806118-818188-Oryza_sativa_Japonica	NC_029259.1	806118	818188	12070	Nonautonomous:Copia	Bianca	yes	GAG|Bianca PROT|Bianca INT|Bianca RT|Bianca RH|Bianca
NC_029259.1-8464891-8471329-Oryza_sativa_Japonica	NC_029259.1	8464891	8471329	6438	Nonautonomous:Copia	Ikeros	yes	GAG|Ikeros PROT|Ikeros INT|Ikeros RT|Ikeros RH|Ikeros
NC_029259.1-8895423-8906725-Oryza_sativa_Japonica	NC_029259.1	8895423	8906725	11302	Nonautonomous:Gypsy	Retand	yes	GAG|Retand PROT|Retand RT|Retand RH|Retand INT|Retand
NC_029259.1-8927197-8939271-Oryza_sativa_Japonica	NC_029259.1	8927197	8939271	12074	Nonautonomous:Gypsy	Tekay	yes	GAG|Tekay PROT|Tekay RT|Tekay RH|Tekay INT|Tekay CHD|Tekay
NC_029259.1-9017829-9037655-Oryza_sativa_Japonica	NC_029259.1	9017829	9037655	19826	Nonautonomous:Gypsy	CRM	yes	GAG|CRM CHDCR|CRM PROT|CRM RT|CRM RH|Tekay INT|CRM CHD|Tekay
NC_029259.1-9023041-9030804-Oryza_sativa_Japonica	NC_029259.1	9023041	9030804	7763	Nonautonomous:Gypsy	CRM	yes	CHDCR|CRM GAG|CRM PROT|CRM RT|CRM RH|CRM INT|CRM
NC_029259.1-9721698-9734157-Oryza_sativa_Japonica	NC_029259.1	9721698	9734157	12459	Nonautonomous:Gypsy	Retand	yes	GAG|Retand PROT|Retand RT|Retand RH|Retand INT|Retand
NC_029260.1-10013843-10024956-Oryza_sativa_Japonica	NC_029260.1	10013843	10024956	11113	Nonautonomous:Gypsy	Tekay	no	GAG|Tekay
NC_029260.1-10177954-10189206-Oryza_sativa_Japonica	NC_029260.1	10177954	10189206	11252	Nonautonomous:Unknown	none	none	none
NC_029260.1-1029271-1040593-Oryza_sativa_Japonica	NC_029260.1	1029271	1040593	11322	Nonautonomous:Gypsy	Retand	yes	GAG|Retand PROT|Retand RT|Retand RH|Retand INT|Retand
NC_029260.1-10383015-10394379-Oryza_sativa_Japonica	NC_029260.1	10383015	10394379	11364	Nonautonomous:Unknown	none	none	none
NC_029260.1-10478005-10490009-Oryza_sativa_Japonica	NC_029260.1	10478005	10490009	12004	Nonautonomous:Gypsy	Tekay	yes	GAG|Tekay PROT|Tekay RT|Tekay RH|Tekay INT|Tekay CHD|Tekay
NC_029260.1-10937859-10945356-Oryza_sativa_Japonica	NC_029260.1	10937859	10945356	7497	Nonautonomous:Gypsy	Retand	no	GAG|Retand
NC_029260.1-10977156-10989395-Oryza_sativa_Japonica	NC_029260.1	10977156	10989395	12239	Nonautonomous:Gypsy	Retand	no	GAG|Retand PROT|Retand RH|Retand INT|Retand
NC_029260.1-11100433-11112505-Oryza_sativa_Japonica	NC_029260.1	11100433	11112505	12072	Nonautonomous:Gypsy	Tekay	yes	GAG|Tekay PROT|Tekay RT|Tekay RH|Tekay INT|Tekay CHD|Tekay
NC_029260.1-11125381-11149505-Oryza_sativa_Japonica	NC_029260.1	11125381	11149505	24124	Nonautonomous:Gypsy	Tekay	no	GAG|Tekay PROT|Tekay RT|Tekay INT|Tekay RH|Tekay CHD|Tekay
NC_029260.1-11130648-11142703-Oryza_sativa_Japonica	NC_029260.1	11130648	11142703	12055	Nonautonomous:Gypsy	Tekay	yes	GAG|Tekay PROT|Tekay RT|Tekay RH|Tekay INT|Tekay CHD|Tekay
NC_029260.1-11225400-11236897-Oryza_sativa_Japonica	NC_029260.1	11225400	11236897	11497	Nonautonomous:Gypsy	Tekay	yes	GAG|Tekay PROT|Tekay RT|Tekay RH|Tekay INT|Tekay CHD|Tekay
NC_029260.1-11282571-11294215-Oryza_sativa_Japonica	NC_029260.1	11282571	11294215	11644	Nonautonomous:Unknown	none	none	none
NC_029260.1-11412819-11418110-Oryza_sativa_Japonica	NC_029260.1	11412819	11418110	5291	Nonautonomous:Gypsy	Reina	yes	GAG|Reina PROT|Reina RT|Reina RH|Reina INT|Reina CHD|Reina
NC_029260.1-11540816-11552996-Oryza_sativa_Japonica	NC_029260.1	11540816	11552996	12180	Nonautonomous:Gypsy	Tekay	no	GAG|Tekay
NC_029260.1-11828110-11838082-Oryza_sativa_Japonica	NC_029260.1	11828110	11838082	9972	Nonautonomous:Unknown	none	none	none
NC_029260.1-12032998-12045064-Oryza_sativa_Japonica	NC_029260.1	12032998	12045064	12066	Nonautonomous:Gypsy	Tekay	yes	GAG|Tekay PROT|Tekay RT|Tekay RH|Tekay INT|Tekay CHD|Tekay
NC_029260.1-12126817-12136799-Oryza_sativa_Japonica	NC_029260.1	12126817	12136799	9982	Nonautonomous:Gypsy	Tekay	no	GAG|Tekay
NC_029260.1-12363422-12371176-Oryza_sativa_Japonica	NC_029260.1	12363422	12371176	7754	Nonautonomous:Gypsy	CRM	yes	CHDCR|CRM GAG|CRM PROT|CRM RT|CRM RH|CRM INT|CRM
NC_029260.1-12582124-12593926-Oryza_sativa_Japonica	NC_029260.1	12582124	12593926	11802	Nonautonomous:Gypsy	Retand	yes	GAG|Retand PROT|Retand RT|Retand RH|Retand INT|Retand
NC_029260.1-12847526-12862814-Oryza_sativa_Japonica	NC_029260.1	12847526	12862814	15288	Nonautonomous:Gypsy	Retand	yes	GAG|Retand PROT|Retand RT|Retand RH|Retand INT|Retand
NC_029260.1-12875541-12885664-Oryza_sativa_Japonica	NC_029260.1	12875541	12885664	10123	Nonautonomous:Gypsy	Athila	no	GAG|Athila RT|Athila RH|Athila INT|Athila
NC_029260.1-12913900-12919333-Oryza_sativa_Japonica	NC_029260.1	12913900	12919333	5433	Nonautonomous:Copia	Ale	yes	GAG|Ale PROT|Ale INT|Ale RT|Ale RH|Ale
NC_029260.1-14116899-14129778-Oryza_sativa_Japonica	NC_029260.1	14116899	14129778	12879	Nonautonomous:Gypsy	Retand	yes	GAG|Retand PROT|Retand RT|Retand RH|Retand INT|Retand
NC_029260.1-14328589-14343210-Oryza_sativa_Japonica	NC_029260.1	14328589	14343210	14621	Nonautonomous:Gypsy	Retand	yes	GAG|Retand PROT|Retand RT|Retand RH|Retand INT|Retand
NC_029260.1-14435186-14443506-Oryza_sativa_Japonica	NC_029260.1	14435186	14443506	8320	Nonautonomous:Gypsy	Retand	no	GAG|Retand PROT|Retand INT|Retand
NC_029260.1-14707452-14712285-Oryza_sativa_Japonica	NC_029260.1	14707452	14712285	4833	Nonautonomous:Copia	Ale	yes	GAG|Ale PROT|Ale INT|Ale RT|Ale RH|Ale
NC_029260.1-15844412-15863730-Oryza_sativa_Japonica	NC_029260.1	15844412	15863730	19318	Nonautonomous:Gypsy	Retand	no	RH|Retand INT|Retand
NC_029260.1-15851083-15859370-Oryza_sativa_Japonica	NC_029260.1	15851083	15859370	8287	Nonautonomous:Gypsy	Retand	no	RH|Retand INT|Retand
NC_029260.1-15920001-15929029-Oryza_sativa_Japonica	NC_029260.1	15920001	15929029	9028	Nonautonomous:Gypsy	Retand	no	GAG|Retand PROT|Retand RH|Retand INT|Retand
NC_029260.1-16591005-16594153-Oryza_sativa_Japonica	NC_029260.1	16591005	16594153	3148	Nonautonomous:Copia	Ale	no	GAG|Ale RT|Ale RH|Ale
NC_029260.1-17157786-17162585-Oryza_sativa_Japonica	NC_029260.1	17157786	17162585	4799	Nonautonomous:Copia	Ale	yes	GAG|Ale PROT|Ale INT|Ale RT|Ale RH|Ale
NC_029260.1-17535783-17546521-Oryza_sativa_Japonica	NC_029260.1	17535783	17546521	10738	Nonautonomous:Gypsy	Retand	yes	GAG|Retand PROT|Retand RT|Retand RH|Retand INT|Retand
NC_029260.1-18057220-18062564-Oryza_sativa_Japonica	NC_029260.1	18057220	18062564	5344	Nonautonomous:Gypsy	Reina	yes	GAG|Reina PROT|Reina RT|Reina RH|Reina INT|Reina CHD|Reina
NC_029260.1-18278714-18290262-Oryza_sativa_Japonica	NC_029260.1	18278714	18290262	11548	Nonautonomous:Gypsy	Retand	yes	GAG|Retand PROT|Retand RT|Retand RH|Retand INT|Retand
NC_029260.1-18541174-18551821-Oryza_sativa_Japonica	NC_029260.1	18541174	18551821	10647	Nonautonomous:Gypsy	Retand	yes	GAG|Retand PROT|Retand RT|Retand RH|Retand INT|Retand
NC_029260.1-18962445-18968409-Oryza_sativa_Japonica	NC_029260.1	18962445	18968409	5964	Nonautonomous:Copia	SIRE	no	GAG|SIRE
NC_029260.1-19666475-19677856-Oryza_sativa_Japonica	NC_029260.1	19666475	19677856	11381	Nonautonomous:Gypsy	Retand	yes	GAG|Retand PROT|Retand RT|Retand RH|Retand INT|Retand
NC_029260.1-20132660-20145364-Oryza_sativa_Japonica	NC_029260.1	20132660	20145364	12704	Nonautonomous:Gypsy	Retand	yes	GAG|Retand PROT|Retand RT|Retand RH|Retand INT|Retand
NC_029260.1-2032385-2044606-Oryza_sativa_Japonica	NC_029260.1	2032385	2044606	12221	Nonautonomous:Gypsy	Retand	yes	GAG|Retand PROT|Retand RT|Retand RH|Retand INT|Retand
NC_029260.1-21573731-21578925-Oryza_sativa_Japonica	NC_029260.1	21573731	21578925	5194	Nonautonomous:Copia	Ivana	yes	GAG|Ivana PROT|Ivana INT|Ivana RT|Ivana RH|Ivana
NC_029260.1-21820993-21828825-Oryza_sativa_Japonica	NC_029260.1	21820993	21828825	7832	Nonautonomous:Gypsy	Retand	no	INT|Retand
NC_029260.1-21862747-21872852-Oryza_sativa_Japonica	NC_029260.1	21862747	21872852	10105	Nonautonomous:Gypsy	Retand	yes	GAG|Retand PROT|Retand RT|Retand RH|Retand INT|Retand
NC_029260.1-21987439-21999838-Oryza_sativa_Japonica	NC_029260.1	21987439	21999838	12399	Nonautonomous:Gypsy	Retand	yes	GAG|Retand PROT|Retand RT|Retand RH|Retand INT|Retand
NC_029260.1-22429950-22435879-Oryza_sativa_Japonica	NC_029260.1	22429950	22435879	5929	Nonautonomous:Gypsy	Reina	yes	GAG|Reina PROT|Reina RT|Reina RH|Reina INT|Reina CHD|Reina
NC_029260.1-22882819-22901800-Oryza_sativa_Japonica	NC_029260.1	22882819	22901800	18981	Nonautonomous:Gypsy	Retand	no	GAG|Retand PROT|Retand RT|Retand INT|Retand
NC_029260.1-23323775-23338428-Oryza_sativa_Japonica	NC_029260.1	23323775	23338428	14653	Nonautonomous:Gypsy	Tekay	yes	GAG|Tekay PROT|Tekay RT|Tekay RH|Tekay INT|Tekay CHD|Tekay
NC_029260.1-23454279-23459137-Oryza_sativa_Japonica	NC_029260.1	23454279	23459137	4858	Nonautonomous:Copia	Ale	yes	GAG|Ale PROT|Ale INT|Ale RT|Ale RH|Ale
NC_029260.1-2405008-2416328-Oryza_sativa_Japonica	NC_029260.1	2405008	2416328	11320	Nonautonomous:Gypsy	Retand	yes	GAG|Retand PROT|Retand RT|Retand RH|Retand INT|Retand
NC_029260.1-2423407-2434720-Oryza_sativa_Japonica	NC_029260.1	2423407	2434720	11313	Nonautonomous:Gypsy	Retand	yes	GAG|Retand PROT|Retand RT|Retand RH|Retand INT|Retand
NC_029260.1-24505602-24516892-Oryza_sativa_Japonica	NC_029260.1	24505602	24516892	11290	Nonautonomous:Gypsy	Retand	yes	GAG|Retand PROT|Retand RT|Retand RH|Retand INT|Retand
NC_029260.1-2453625-2460057-Oryza_sativa_Japonica	NC_029260.1	2453625	2460057	6432	Nonautonomous:Copia	Ikeros	yes	GAG|Ikeros PROT|Ikeros INT|Ikeros RT|Ikeros RH|Ikeros
NC_029260.1-24743486-24756403-Oryza_sativa_Japonica	NC_029260.1	24743486	24756403	12917	Nonautonomous:Gypsy	Retand	yes	GAG|Retand PROT|Retand RT|Retand RH|Retand INT|Retand
NC_029260.1-24914833-24924034-Oryza_sativa_Japonica	NC_029260.1	24914833	24924034	9201	Nonautonomous:Copia	Ale	yes	GAG|Ale PROT|Ale INT|Ale RT|Ale RH|Ale
NC_029260.1-24975018-24986319-Oryza_sativa_Japonica	NC_029260.1	24975018	24986319	11301	Nonautonomous:Gypsy	Retand	yes	GAG|Retand PROT|Retand RT|Retand RH|Retand INT|Retand
NC_029260.1-25202930-25214143-Oryza_sativa_Japonica	NC_029260.1	25202930	25214143	11213	Nonautonomous:Gypsy	Retand	yes	GAG|Retand PROT|Retand RT|Retand RH|Retand INT|Retand
NC_029260.1-25238053-25251073-Oryza_sativa_Japonica	NC_029260.1	25238053	25251073	13020	Nonautonomous:Gypsy	Retand	yes	GAG|Retand PROT|Retand RT|Retand RH|Retand INT|Retand
NC_029260.1-25591410-25606052-Oryza_sativa_Japonica	NC_029260.1	25591410	25606052	14642	Nonautonomous:Gypsy	Retand	yes	GAG|Retand PROT|Retand RT|Retand RH|Retand INT|Retand
NC_029260.1-25972618-25983257-Oryza_sativa_Japonica	NC_029260.1	25972618	25983257	10639	Nonautonomous:Gypsy	Retand	no	GAG|Retand INT|Retand
NC_029260.1-26522122-26535065-Oryza_sativa_Japonica	NC_029260.1	26522122	26535065	12943	Nonautonomous:Gypsy	Retand	yes	GAG|Retand PROT|Retand RT|Retand RH|Retand INT|Retand
NC_029260.1-2686825-2698586-Oryza_sativa_Japonica	NC_029260.1	2686825	2698586	11761	Nonautonomous:Gypsy	Tekay	yes	GAG|Tekay PROT|Tekay RT|Tekay RH|Tekay INT|Tekay CHD|Tekay
NC_029260.1-27185747-27197402-Oryza_sativa_Japonica	NC_029260.1	27185747	27197402	11655	Nonautonomous:Gypsy	Retand	yes	GAG|Retand PROT|Retand RT|Retand RH|Retand INT|Retand
NC_029260.1-27467211-27472340-Oryza_sativa_Japonica	NC_029260.1	27467211	27472340	5129	Nonautonomous:Copia	Tork	yes	GAG|Tork PROT|Tork INT|Tork RT|Tork RH|Tork
NC_029260.1-27608527-27613547-Oryza_sativa_Japonica	NC_029260.1	27608527	27613547	5020	Autonomous:Copia	Ivana	yes	GAG|Ivana PROT|Ivana INT|Ivana RT|Ivana RH|Ivana
NC_029260.1-28605664-28610423-Oryza_sativa_Japonica	NC_029260.1	28605664	28610423	4759	Nonautonomous:Copia	Ale	yes	GAG|Ale PROT|Ale INT|Ale RT|Ale RH|Ale
NC_029260.1-2952425-2966774-Oryza_sativa_Japonica	NC_029260.1	2952425	2966774	14349	Nonautonomous:Gypsy	Tekay	no	GAG|Reina CHD|Tekay INT|Tekay RH|Tekay RT|Tekay PROT|Tekay
NC_029260.1-3017146-3026187-Oryza_sativa_Japonica	NC_029260.1	3017146	3026187	9041	Nonautonomous:Unknown	none	none	none
NC_029260.1-3411340-3416828-Oryza_sativa_Japonica	NC_029260.1	3411340	3416828	5488	Autonomous:Gypsy	Reina	yes	GAG|Reina PROT|Reina RT|Reina RH|Reina INT|Reina CHD|Reina
NC_029260.1-4033775-4045080-Oryza_sativa_Japonica	NC_029260.1	4033775	4045080	11305	Nonautonomous:Gypsy	Retand	yes	GAG|Retand PROT|Retand RT|Retand RH|Retand INT|Retand
NC_029260.1-4506542-4516741-Oryza_sativa_Japonica	NC_029260.1	4506542	4516741	10199	Nonautonomous:Unknown	none	none	none
NC_029260.1-4754860-4766834-Oryza_sativa_Japonica	NC_029260.1	4754860	4766834	11974	Nonautonomous:Copia	SIRE	yes	GAG|SIRE PROT|SIRE INT|SIRE RT|SIRE RH|SIRE
NC_029260.1-5041395-5053488-Oryza_sativa_Japonica	NC_029260.1	5041395	5053488	12093	Nonautonomous:Gypsy	Tekay	yes	GAG|Tekay PROT|Tekay RT|Tekay RH|Tekay INT|Tekay CHD|Tekay
NC_029260.1-5168609-5176303-Oryza_sativa_Japonica	NC_029260.1	5168609	5176303	7694	Nonautonomous:Copia	Bianca	yes	GAG|Bianca PROT|Bianca INT|Bianca RT|Bianca RH|Bianca
NC_029260.1-6033941-6039426-Oryza_sativa_Japonica	NC_029260.1	6033941	6039426	5485	Nonautonomous:Copia	Ale	yes	GAG|Ale PROT|Ale INT|Ale RT|Ale RH|Ale
NC_029260.1-6110899-6123434-Oryza_sativa_Japonica	NC_029260.1	6110899	6123434	12535	Nonautonomous:Gypsy	Tekay	yes	GAG|Tekay PROT|Tekay RT|Tekay RH|Tekay INT|Tekay CHD|Tekay
NC_029260.1-6178645-6190444-Oryza_sativa_Japonica	NC_029260.1	6178645	6190444	11799	Nonautonomous:Gypsy	Retand	yes	GAG|Retand PROT|Retand RT|Retand RH|Retand INT|Retand
NC_029260.1-6240563-6245814-Oryza_sativa_Japonica	NC_029260.1	6240563	6245814	5251	Nonautonomous:Copia	Ivana	yes	GAG|Ivana PROT|Ivana INT|Ivana RT|Ivana RH|Ivana
NC_029260.1-7105860-7111060-Oryza_sativa_Japonica	NC_029260.1	7105860	7111060	5200	Nonautonomous:Copia	Ale	yes	GAG|Ale PROT|Ale INT|Ale RT|Ale RH|Ale
NC_029260.1-746178-757498-Oryza_sativa_Japonica	NC_029260.1	746178	757498	11320	Nonautonomous:Gypsy	Retand	yes	GAG|Retand PROT|Retand RT|Retand RH|Retand INT|Retand
NC_029260.1-7486358-7491166-Oryza_sativa_Japonica	NC_029260.1	7486358	7491166	4808	Nonautonomous:Copia	Ale	yes	GAG|Ale PROT|Ale INT|Ale RT|Ale RH|Ale
NC_029260.1-7732455-7744106-Oryza_sativa_Japonica	NC_029260.1	7732455	7744106	11651	Nonautonomous:Gypsy	Retand	no	GAG|Retand PROT|Retand RT|Retand RH|Retand INT|Retand
NC_029260.1-8058648-8064632-Oryza_sativa_Japonica	NC_029260.1	8058648	8064632	5984	Nonautonomous:Gypsy	Reina	no	GAG|Reina RT|Reina RH|Reina INT|Reina CHD|Reina
NC_029260.1-8064895-8077846-Oryza_sativa_Japonica	NC_029260.1	8064895	8077846	12951	Nonautonomous:Gypsy	Retand	yes	GAG|Retand PROT|Retand RT|Retand RH|Retand INT|Retand
NC_029260.1-806574-812578-Oryza_sativa_Japonica	NC_029260.1	806574	812578	6004	Nonautonomous:Copia	Ikeros	no	GAG|Ikeros PROT|Ikeros RT|Ikeros RH|Ikeros
NC_029260.1-8235829-8240870-Oryza_sativa_Japonica	NC_029260.1	8235829	8240870	5041	Nonautonomous:Copia	Ale	yes	GAG|Ale PROT|Ale INT|Ale RT|Ale RH|Ale
NC_029260.1-8633089-8639146-Oryza_sativa_Japonica	NC_029260.1	8633089	8639146	6057	Nonautonomous:Gypsy	Reina	yes	GAG|Reina PROT|Reina RT|Reina RH|Reina INT|Reina CHD|Reina
NC_029260.1-9021856-9033168-Oryza_sativa_Japonica	NC_029260.1	9021856	9033168	11312	Nonautonomous:Gypsy	Retand	yes	GAG|Retand PROT|Retand RT|Retand RH|Retand INT|Retand
NC_029260.1-9110321-9123169-Oryza_sativa_Japonica	NC_029260.1	9110321	9123169	12848	Nonautonomous:Gypsy	Retand	yes	GAG|Retand PROT|Retand RT|Retand RH|Retand INT|Retand
NC_029260.1-9405585-9417325-Oryza_sativa_Japonica	NC_029260.1	9405585	9417325	11740	Nonautonomous:Gypsy	Tekay	yes	GAG|Tekay PROT|Tekay RT|Tekay RH|Tekay INT|Tekay CHD|Tekay
NC_029260.1-9480318-9491626-Oryza_sativa_Japonica	NC_029260.1	9480318	9491626	11308	Nonautonomous:Gypsy	Retand	yes	GAG|Retand PROT|Retand RT|Retand RH|Retand INT|Retand
NC_029260.1-9598470-9610186-Oryza_sativa_Japonica	NC_029260.1	9598470	9610186	11716	Nonautonomous:Gypsy	Tekay	yes	GAG|Tekay PROT|Tekay RT|Tekay RH|Tekay INT|Tekay CHD|Tekay
NC_029260.1-9613454-9624999-Oryza_sativa_Japonica	NC_029260.1	9613454	9624999	11545	Nonautonomous:Gypsy	Tekay	no	GAG|Tekay
NC_029260.1-9947858-9959173-Oryza_sativa_Japonica	NC_029260.1	9947858	9959173	11315	Nonautonomous:Unknown	none	none	none
NC_029261.1-10228760-10239634-Oryza_sativa_Japonica	NC_029261.1	10228760	10239634	10874	Nonautonomous:Unknown	none	none	none
NC_029261.1-10762635-10776447-Oryza_sativa_Japonica	NC_029261.1	10762635	10776447	13812	Nonautonomous:Gypsy	Ogre	yes	GAG|Ogre PROT|Ogre RT|Ogre RH|Ogre INT|Ogre
NC_029261.1-11561995-11574508-Oryza_sativa_Japonica	NC_029261.1	11561995	11574508	12513	Nonautonomous:Gypsy	Retand	yes	GAG|Retand PROT|Retand RT|Retand RH|Retand INT|Retand
NC_029261.1-12233683-12251334-Oryza_sativa_Japonica	NC_029261.1	12233683	12251334	17651	Nonautonomous:Gypsy	Retand	no	INT|Retand GAG|Retand PROT|Retand RT|Retand RH|Retand
NC_029261.1-12236300-12249290-Oryza_sativa_Japonica	NC_029261.1	12236300	12249290	12990	Nonautonomous:Gypsy	Retand	yes	GAG|Retand PROT|Retand RT|Retand RH|Retand INT|Retand
NC_029261.1-12391346-12402821-Oryza_sativa_Japonica	NC_029261.1	12391346	12402821	11475	Nonautonomous:Gypsy	Retand	yes	GAG|Retand PROT|Retand RT|Retand RH|Retand INT|Retand
NC_029261.1-1246267-1257331-Oryza_sativa_Japonica	NC_029261.1	1246267	1257331	11064	Nonautonomous:Gypsy	Tekay	no	GAG|Tekay
NC_029261.1-12478438-12489898-Oryza_sativa_Japonica	NC_029261.1	12478438	12489898	11460	Nonautonomous:Gypsy	Tekay	yes	GAG|Tekay PROT|Tekay RT|Tekay RH|Tekay INT|Tekay CHD|Tekay
NC_029261.1-13132585-13141879-Oryza_sativa_Japonica	NC_029261.1	13132585	13141879	9294	Nonautonomous:Gypsy	Ogre	no	RH|Ogre INT|Ogre
NC_029261.1-14102991-14113777-Oryza_sativa_Japonica	NC_029261.1	14102991	14113777	10786	Nonautonomous:Gypsy	Retand	yes	GAG|Retand PROT|Retand RT|Retand RH|Retand INT|Retand
NC_029261.1-14482704-14494250-Oryza_sativa_Japonica	NC_029261.1	14482704	14494250	11546	Nonautonomous:Gypsy	Retand	no	GAG|Retand PROT|Retand RT|Retand RH|Retand INT|Retand
NC_029261.1-14538068-14540859-Oryza_sativa_Japonica	NC_029261.1	14538068	14540859	2791	Nonautonomous:Gypsy	CRM	no	INT|CRM CHDCR|CRM
NC_029261.1-14558021-14568345-Oryza_sativa_Japonica	NC_029261.1	14558021	14568345	10324	Nonautonomous:Gypsy	Retand	yes	GAG|Retand PROT|Retand RT|Retand RH|Retand INT|Retand
NC_029261.1-14685783-14701078-Oryza_sativa_Japonica	NC_029261.1	14685783	14701078	15295	Nonautonomous:Gypsy	Tekay	yes	GAG|Tekay PROT|Tekay RT|Tekay RH|Tekay INT|Tekay CHD|Tekay
NC_029261.1-14731696-14739450-Oryza_sativa_Japonica	NC_029261.1	14731696	14739450	7754	Nonautonomous:Gypsy	CRM	yes	GAG|CRM PROT|CRM RT|CRM RH|CRM INT|CRM CHDCR|CRM
NC_029261.1-15135905-15143662-Oryza_sativa_Japonica	NC_029261.1	15135905	15143662	7757	Nonautonomous:Gypsy	CRM	yes	CHDCR|CRM GAG|CRM PROT|CRM RT|CRM RH|CRM INT|CRM
NC_029261.1-15585257-15595566-Oryza_sativa_Japonica	NC_029261.1	15585257	15595566	10309	Nonautonomous:Gypsy	CRM	yes	GAG|CRM PROT|CRM RT|CRM RH|CRM INT|CRM CHDCR|CRM
NC_029261.1-16094342-16099537-Oryza_sativa_Japonica	NC_029261.1	16094342	16099537	5195	Autonomous:Copia	Ivana	yes	GAG|Ivana PROT|Ivana INT|Ivana RT|Ivana RH|Ivana
NC_029261.1-16619930-16632884-Oryza_sativa_Japonica	NC_029261.1	16619930	16632884	12954	Nonautonomous:Gypsy	Retand	yes	GAG|Retand PROT|Retand RT|Retand RH|Retand INT|Retand
NC_029261.1-17081414-17092725-Oryza_sativa_Japonica	NC_029261.1	17081414	17092725	11311	Nonautonomous:Gypsy	Retand	yes	GAG|Retand PROT|Retand RT|Retand RH|Retand INT|Retand
NC_029261.1-17248680-17254747-Oryza_sativa_Japonica	NC_029261.1	17248680	17254747	6067	Nonautonomous:Copia	Ikeros	no	GAG|Ikeros PROT|Ikeros RT|Ikeros RH|Ikeros
NC_029261.1-17413928-17426253-Oryza_sativa_Japonica	NC_029261.1	17413928	17426253	12325	Nonautonomous:Gypsy	Tekay	yes	GAG|Tekay PROT|Tekay RT|Tekay RH|Tekay INT|Tekay CHD|Tekay
NC_029261.1-18262468-18277521-Oryza_sativa_Japonica	NC_029261.1	18262468	18277521	15053	Nonautonomous:Gypsy	Tekay	yes	GAG|Tekay PROT|Tekay RT|Tekay RH|Tekay INT|Tekay CHD|Tekay
NC_029261.1-18341444-18352189-Oryza_sativa_Japonica	NC_029261.1	18341444	18352189	10745	Nonautonomous:Unknown	none	none	none
NC_029261.1-18385383-18396961-Oryza_sativa_Japonica	NC_029261.1	18385383	18396961	11578	Nonautonomous:Gypsy	Tekay	yes	GAG|Tekay PROT|Tekay RT|Tekay RH|Tekay INT|Tekay CHD|Tekay
NC_029261.1-18642598-18664884-Oryza_sativa_Japonica	NC_029261.1	18642598	18664884	22286	Nonautonomous:Gypsy	Tekay	yes	GAG|Tekay PROT|Tekay RT|Tekay RH|Tekay INT|Tekay CHD|Tekay
NC_029261.1-18683334-18707010-Oryza_sativa_Japonica	NC_029261.1	18683334	18707010	23676	Nonautonomous:Gypsy	Tekay	no	CHD|Tekay RT|Tekay GAG|Tekay PROT|Tekay RH|Tekay INT|Tekay
NC_029261.1-18691753-18703356-Oryza_sativa_Japonica	NC_029261.1	18691753	18703356	11603	Nonautonomous:Gypsy	Tekay	yes	GAG|Tekay PROT|Tekay RT|Tekay RH|Tekay INT|Tekay CHD|Tekay
NC_029261.1-18843802-18854406-Oryza_sativa_Japonica	NC_029261.1	18843802	18854406	10604	Nonautonomous:Unknown	none	none	none
NC_029261.1-19080827-19091847-Oryza_sativa_Japonica	NC_029261.1	19080827	19091847	11020	Nonautonomous:Gypsy	Tekay	yes	GAG|Tekay PROT|Tekay RT|Tekay RH|Tekay INT|Tekay CHD|Tekay
NC_029261.1-19364472-19375798-Oryza_sativa_Japonica	NC_029261.1	19364472	19375798	11326	Nonautonomous:Gypsy	Retand	yes	GAG|Retand PROT|Retand RT|Retand RH|Retand INT|Retand
NC_029261.1-19380099-19391473-Oryza_sativa_Japonica	NC_029261.1	19380099	19391473	11374	Nonautonomous:Gypsy	Retand	yes	GAG|Retand PROT|Retand RT|Retand RH|Retand INT|Retand
NC_029261.1-19688892-19694384-Oryza_sativa_Japonica	NC_029261.1	19688892	19694384	5492	Nonautonomous:Gypsy	Retand	no	GAG|Retand INT|Retand RH|Retand
NC_029261.1-19712002-19723305-Oryza_sativa_Japonica	NC_029261.1	19712002	19723305	11303	Nonautonomous:Gypsy	Retand	yes	GAG|Retand PROT|Retand RT|Retand RH|Retand INT|Retand
NC_029261.1-19931105-19942029-Oryza_sativa_Japonica	NC_029261.1	19931105	19942029	10924	Nonautonomous:Gypsy	Retand	yes	GAG|Retand PROT|Retand RT|Retand RH|Retand INT|Retand
NC_029261.1-20428097-20433109-Oryza_sativa_Japonica	NC_029261.1	20428097	20433109	5012	Nonautonomous:Copia	Tork	no	GAG|Tork RT|Tork RH|Tork
NC_029261.1-20511059-20520670-Oryza_sativa_Japonica	NC_029261.1	20511059	20520670	9611	Nonautonomous:Gypsy	Retand	no	GAG|Retand RT|Retand RH|Retand INT|Retand
NC_029261.1-20534002-20541777-Oryza_sativa_Japonica	NC_029261.1	20534002	20541777	7775	Nonautonomous:Gypsy	CRM	yes	CHDCR|CRM GAG|CRM PROT|CRM RT|CRM RH|CRM INT|CRM
NC_029261.1-21052022-21060205-Oryza_sativa_Japonica	NC_029261.1	21052022	21060205	8183	Nonautonomous:Gypsy	Reina	yes	GAG|Reina PROT|Reina RT|Reina RH|Reina INT|Reina
NC_029261.1-22338245-22349536-Oryza_sativa_Japonica	NC_029261.1	22338245	22349536	11291	Nonautonomous:Gypsy	Retand	yes	GAG|Retand PROT|Retand RT|Retand RH|Retand INT|Retand
NC_029261.1-22469239-22481331-Oryza_sativa_Japonica	NC_029261.1	22469239	22481331	12092	Nonautonomous:Gypsy	Tekay	yes	GAG|Tekay PROT|Tekay RT|Tekay RH|Tekay INT|Tekay CHD|Tekay
NC_029261.1-22753865-22765151-Oryza_sativa_Japonica	NC_029261.1	22753865	22765151	11286	Nonautonomous:Gypsy	Retand	yes	GAG|Retand PROT|Retand RT|Retand RH|Retand INT|Retand
NC_029261.1-22804885-22810036-Oryza_sativa_Japonica	NC_029261.1	22804885	22810036	5151	Nonautonomous:Copia	Ale	yes	GAG|Ale PROT|Ale INT|Ale RT|Ale RH|Ale
NC_029261.1-23165422-23170542-Oryza_sativa_Japonica	NC_029261.1	23165422	23170542	5120	Nonautonomous:Gypsy	Reina	yes	GAG|Reina PROT|Reina RT|Reina RH|Reina INT|Reina CHD|Reina
NC_029261.1-23639148-23643901-Oryza_sativa_Japonica	NC_029261.1	23639148	23643901	4753	Nonautonomous:Copia	Ale	yes	GAG|Ale PROT|Ale INT|Ale RT|Ale RH|Ale
NC_029261.1-23662758-23668236-Oryza_sativa_Japonica	NC_029261.1	23662758	23668236	5478	Nonautonomous:Gypsy	Reina	yes	GAG|Reina PROT|Reina RT|Reina RH|Reina INT|Reina CHD|Reina
NC_029261.1-23747253-23760098-Oryza_sativa_Japonica	NC_029261.1	23747253	23760098	12845	Nonautonomous:Gypsy	Retand	yes	GAG|Retand PROT|Retand RT|Retand RH|Retand INT|Retand
NC_029261.1-23786052-23799042-Oryza_sativa_Japonica	NC_029261.1	23786052	23799042	12990	Nonautonomous:Gypsy	Retand	no	GAG|Retand PROT|Retand RT|Retand RH|Retand
NC_029261.1-24108928-24121797-Oryza_sativa_Japonica	NC_029261.1	24108928	24121797	12869	Nonautonomous:Gypsy	Retand	yes	GAG|Retand PROT|Retand RT|Retand RH|Retand INT|Retand
NC_029261.1-24750284-24760567-Oryza_sativa_Japonica	NC_029261.1	24750284	24760567	10283	Nonautonomous:Copia	SIRE	yes	GAG|SIRE PROT|SIRE INT|SIRE RT|SIRE RH|SIRE
NC_029261.1-24968645-24974401-Oryza_sativa_Japonica	NC_029261.1	24968645	24974401	5756	Nonautonomous:Copia	Ivana	yes	GAG|Ivana PROT|Ivana INT|Ivana RT|Ivana RH|Ivana
NC_029261.1-25456414-25470547-Oryza_sativa_Japonica	NC_029261.1	25456414	25470547	14133	Nonautonomous:Copia	SIRE	yes	GAG|SIRE PROT|SIRE INT|SIRE RT|SIRE RH|SIRE
NC_029261.1-25609982-25621535-Oryza_sativa_Japonica	NC_029261.1	25609982	25621535	11553	Nonautonomous:Gypsy	Retand	no	GAG|Retand RT|Retand RH|Retand INT|Retand
NC_029261.1-2568072-2573734-Oryza_sativa_Japonica	NC_029261.1	2568072	2573734	5662	Nonautonomous:Copia	Ivana	yes	GAG|Ivana PROT|Ivana INT|Ivana RT|Ivana RH|Ivana
NC_029261.1-25841844-25850629-Oryza_sativa_Japonica	NC_029261.1	25841844	25850629	8785	Nonautonomous:Unknown	none	none	none
NC_029261.1-26047140-26058546-Oryza_sativa_Japonica	NC_029261.1	26047140	26058546	11406	Nonautonomous:Gypsy	Retand	no	GAG|Retand PROT|Retand RT|Retand INT|Retand
NC_029261.1-26176130-26181092-Oryza_sativa_Japonica	NC_029261.1	26176130	26181092	4962	Nonautonomous:Copia	Ivana	no	GAG|Ivana INT|Ivana RT|Ivana RH|Ivana
NC_029261.1-2664850-2677787-Oryza_sativa_Japonica	NC_029261.1	2664850	2677787	12937	Nonautonomous:Gypsy	Retand	yes	GAG|Retand PROT|Retand RT|Retand RH|Retand INT|Retand
NC_029261.1-27183164-27195992-Oryza_sativa_Japonica	NC_029261.1	27183164	27195992	12828	Autonomous:Gypsy	Retand	yes	GAG|Retand PROT|Retand RT|Retand RH|Retand INT|Retand
NC_029261.1-27308897-27314537-Oryza_sativa_Japonica	NC_029261.1	27308897	27314537	5640	Nonautonomous:Gypsy	Reina	yes	GAG|Reina PROT|Reina RT|Reina RH|Reina INT|Reina CHD|Reina
NC_029261.1-27350277-27363208-Oryza_sativa_Japonica	NC_029261.1	27350277	27363208	12931	Nonautonomous:Gypsy	Retand	yes	GAG|Retand PROT|Retand RT|Retand RH|Retand INT|Retand
NC_029261.1-27686577-27699479-Oryza_sativa_Japonica	NC_029261.1	27686577	27699479	12902	Nonautonomous:Gypsy	Retand	no	GAG|Retand PROT|Retand RT|Retand RH|Retand INT|Retand
NC_029261.1-27770701-27776337-Oryza_sativa_Japonica	NC_029261.1	27770701	27776337	5636	Nonautonomous:Gypsy	Reina	yes	GAG|Reina PROT|Reina RT|Reina RH|Reina INT|Reina CHD|Reina
NC_029261.1-27980300-27991975-Oryza_sativa_Japonica	NC_029261.1	27980300	27991975	11675	Nonautonomous:Gypsy	Retand	yes	GAG|Retand PROT|Retand RT|Retand RH|Retand INT|Retand
NC_029261.1-28242224-28253569-Oryza_sativa_Japonica	NC_029261.1	28242224	28253569	11345	Nonautonomous:Gypsy	Retand	yes	GAG|Retand PROT|Retand RT|Retand RH|Retand INT|Retand
NC_029261.1-28537090-28543616-Oryza_sativa_Japonica	NC_029261.1	28537090	28543616	6526	Nonautonomous:Copia	Tork	no	GAG|Tork PROT|Tork
NC_029261.1-28708566-28719856-Oryza_sativa_Japonica	NC_029261.1	28708566	28719856	11290	Nonautonomous:Gypsy	Retand	yes	GAG|Retand PROT|Retand RT|Retand RH|Retand INT|Retand
NC_029261.1-28882368-28887265-Oryza_sativa_Japonica	NC_029261.1	28882368	28887265	4897	Nonautonomous:Copia	Ale	yes	GAG|Ale PROT|Ale INT|Ale RT|Ale RH|Ale
NC_029261.1-29094727-29107480-Oryza_sativa_Japonica	NC_029261.1	29094727	29107480	12753	Nonautonomous:Gypsy	Retand	yes	GAG|Retand PROT|Retand RT|Retand RH|Retand INT|Retand
NC_029261.1-29389153-29395602-Oryza_sativa_Japonica	NC_029261.1	29389153	29395602	6449	Nonautonomous:Copia	Ikeros	yes	GAG|Ikeros PROT|Ikeros INT|Ikeros RT|Ikeros RH|Ikeros
NC_029261.1-30423511-30434829-Oryza_sativa_Japonica	NC_029261.1	30423511	30434829	11318	Nonautonomous:Gypsy	Retand	yes	GAG|Retand PROT|Retand RT|Retand RH|Retand INT|Retand
NC_029261.1-3731576-3745273-Oryza_sativa_Japonica	NC_029261.1	3731576	3745273	13697	Nonautonomous:Gypsy	Ogre	no	GAG|Ogre PROT|Ogre RT|Ogre RH|Ogre INT|Ogre
NC_029261.1-4558058-4562779-Oryza_sativa_Japonica	NC_029261.1	4558058	4562779	4721	Nonautonomous:Gypsy	Reina	yes	GAG|Reina PROT|Reina RT|Reina RH|Reina INT|Reina CHD|Reina
NC_029261.1-4901180-4914329-Oryza_sativa_Japonica	NC_029261.1	4901180	4914329	13149	Nonautonomous:Gypsy	Retand	yes	GAG|Retand PROT|Retand RT|Retand RH|Retand INT|Retand
NC_029261.1-6937997-6949353-Oryza_sativa_Japonica	NC_029261.1	6937997	6949353	11356	Nonautonomous:Gypsy	Retand	yes	GAG|Retand PROT|Retand RT|Retand RH|Retand INT|Retand
NC_029261.1-7195956-7201638-Oryza_sativa_Japonica	NC_029261.1	7195956	7201638	5682	Nonautonomous:Gypsy	Reina	yes	GAG|Reina PROT|Reina RT|Reina RH|Reina INT|Reina CHD|Reina
NC_029261.1-7388590-7393664-Oryza_sativa_Japonica	NC_029261.1	7388590	7393664	5074	Nonautonomous:Copia	Ale	yes	GAG|Ale PROT|Ale INT|Ale RT|Ale RH|Ale
NC_029261.1-7878925-7890233-Oryza_sativa_Japonica	NC_029261.1	7878925	7890233	11308	Nonautonomous:Gypsy	Retand	yes	GAG|Retand PROT|Retand RT|Retand RH|Retand INT|Retand
NC_029261.1-8211040-8222383-Oryza_sativa_Japonica	NC_029261.1	8211040	8222383	11343	Nonautonomous:Gypsy	Retand	yes	GAG|Retand PROT|Retand RT|Retand RH|Retand INT|Retand
NC_029261.1-8826944-8832592-Oryza_sativa_Japonica	NC_029261.1	8826944	8832592	5648	Nonautonomous:Gypsy	Reina	yes	GAG|Reina PROT|Reina RT|Reina RH|Reina INT|Reina CHD|Reina
NC_029261.1-9292699-9305528-Oryza_sativa_Japonica	NC_029261.1	9292699	9305528	12829	Nonautonomous:Gypsy	Retand	yes	GAG|Retand PROT|Retand RT|Retand RH|Retand INT|Retand
NC_029261.1-9811656-9817748-Oryza_sativa_Japonica	NC_029261.1	9811656	9817748	6092	Nonautonomous:Copia	Ikeros	no	GAG|Ikeros PROT|Ikeros RT|Ikeros RH|Ikeros
NC_029261.1-9950528-9971316-Oryza_sativa_Japonica	NC_029261.1	9950528	9971316	20788	Nonautonomous:Copia	Alesia	no	INT|Alesia
NC_029261.1-9955727-9966342-Oryza_sativa_Japonica	NC_029261.1	9955727	9966342	10615	Nonautonomous:Unknown	none	none	none
NC_029262.1-10444344-10455863-Oryza_sativa_Japonica	NC_029262.1	10444344	10455863	11519	Nonautonomous:Gypsy	Tekay	no	GAG|Tekay
NC_029262.1-10525514-10537589-Oryza_sativa_Japonica	NC_029262.1	10525514	10537589	12075	Nonautonomous:Gypsy	Tekay	yes	GAG|Tekay PROT|Tekay RT|Tekay RH|Tekay INT|Tekay CHD|Tekay
NC_029262.1-10578708-10589356-Oryza_sativa_Japonica	NC_029262.1	10578708	10589356	10648	Nonautonomous:Unknown	none	none	none
NC_029262.1-11227399-11233070-Oryza_sativa_Japonica	NC_029262.1	11227399	11233070	5671	Nonautonomous:Copia	Ivana	yes	GAG|Ivana PROT|Ivana INT|Ivana RT|Ivana RH|Ivana
NC_029262.1-11535432-11542161-Oryza_sativa_Japonica	NC_029262.1	11535432	11542161	6729	Nonautonomous:Gypsy	Ogre	no	GAG|Ogre RT|Ogre RH|Ogre INT|Ogre
NC_029262.1-12404023-12412937-Oryza_sativa_Japonica	NC_029262.1	12404023	12412937	8914	Nonautonomous:Unknown	none	none	none
NC_029262.1-12490089-12504511-Oryza_sativa_Japonica	NC_029262.1	12490089	12504511	14422	Nonautonomous:Gypsy	Tekay	no	GAG|Tekay
NC_029262.1-13011851-13024087-Oryza_sativa_Japonica	NC_029262.1	13011851	13024087	12236	Nonautonomous:Gypsy	Retand	yes	GAG|Retand PROT|Retand RT|Retand RH|Retand INT|Retand
NC_029262.1-13086158-13098203-Oryza_sativa_Japonica	NC_029262.1	13086158	13098203	12045	Nonautonomous:Copia	SIRE	yes	GAG|SIRE PROT|SIRE INT|SIRE RT|SIRE RH|SIRE
NC_029262.1-13131231-13144173-Oryza_sativa_Japonica	NC_029262.1	13131231	13144173	12942	Nonautonomous:Gypsy	Retand	yes	GAG|Retand PROT|Retand RT|Retand RH|Retand INT|Retand
NC_029262.1-13260328-13267166-Oryza_sativa_Japonica	NC_029262.1	13260328	13267166	6838	Nonautonomous:Copia	Ikeros	yes	GAG|Ikeros PROT|Ikeros INT|Ikeros RT|Ikeros RH|Ikeros
NC_029262.1-13451750-13467710-Oryza_sativa_Japonica	NC_029262.1	13451750	13467710	15960	Nonautonomous:Gypsy	Retand	yes	GAG|Retand PROT|Retand RT|Retand RH|Retand INT|Retand
NC_029262.1-13824479-13835844-Oryza_sativa_Japonica	NC_029262.1	13824479	13835844	11365	Nonautonomous:Gypsy	Retand	yes	GAG|Retand PROT|Retand RT|Retand RH|Retand INT|Retand
NC_029262.1-13983251-13997670-Oryza_sativa_Japonica	NC_029262.1	13983251	13997670	14419	Nonautonomous:Gypsy	Retand	yes	GAG|Retand PROT|Retand RT|Retand RH|Retand INT|Retand
NC_029262.1-14056975-14068569-Oryza_sativa_Japonica	NC_029262.1	14056975	14068569	11594	Nonautonomous:Unknown	none	none	none
NC_029262.1-14123636-14137914-Oryza_sativa_Japonica	NC_029262.1	14123636	14137914	14278	Nonautonomous:Gypsy	CRM	yes	CHDCR|CRM GAG|CRM PROT|CRM RT|CRM RH|CRM INT|CRM
NC_029262.1-14320119-14331722-Oryza_sativa_Japonica	NC_029262.1	14320119	14331722	11603	Nonautonomous:Gypsy	Retand	yes	GAG|Retand PROT|Retand RT|Retand RH|Retand INT|Retand
NC_029262.1-14683325-14688186-Oryza_sativa_Japonica	NC_029262.1	14683325	14688186	4861	Nonautonomous:Copia	Ale	yes	GAG|Ale PROT|Ale INT|Ale RT|Ale RH|Ale
NC_029262.1-14927868-14939581-Oryza_sativa_Japonica	NC_029262.1	14927868	14939581	11713	Nonautonomous:Gypsy	Retand	yes	GAG|Retand PROT|Retand RT|Retand RH|Retand INT|Retand
NC_029262.1-15080855-15095173-Oryza_sativa_Japonica	NC_029262.1	15080855	15095173	14318	Nonautonomous:Gypsy	Tekay	yes	GAG|Tekay PROT|Tekay RT|Tekay RH|Tekay INT|Tekay CHD|Tekay
NC_029262.1-15626579-15631842-Oryza_sativa_Japonica	NC_029262.1	15626579	15631842	5263	Nonautonomous:Copia	Ale	yes	GAG|Ale PROT|Ale INT|Ale RT|Ale RH|Ale
NC_029262.1-15693084-15702348-Oryza_sativa_Japonica	NC_029262.1	15693084	15702348	9264	Nonautonomous:Copia	SIRE	yes	GAG|SIRE PROT|SIRE INT|SIRE RT|SIRE RH|SIRE
NC_029262.1-16074307-16080782-Oryza_sativa_Japonica	NC_029262.1	16074307	16080782	6475	Nonautonomous:Copia	TAR	yes	GAG|TAR PROT|TAR INT|TAR RT|TAR RH|TAR
NC_029262.1-16234078-16248324-Oryza_sativa_Japonica	NC_029262.1	16234078	16248324	14246	Nonautonomous:Gypsy	Retand	yes	GAG|Retand PROT|Retand RT|Retand RH|Retand INT|Retand
NC_029262.1-16642118-16650018-Oryza_sativa_Japonica	NC_029262.1	16642118	16650018	7900	Nonautonomous:Copia	SIRE	yes	GAG|SIRE PROT|SIRE INT|SIRE RT|SIRE RH|SIRE
NC_029262.1-17063492-17068318-Oryza_sativa_Japonica	NC_029262.1	17063492	17068318	4826	Nonautonomous:Copia	Ale	yes	GAG|Ale PROT|Ale INT|Ale RT|Ale RH|Ale
NC_029262.1-1730017-1742605-Oryza_sativa_Japonica	NC_029262.1	1730017	1742605	12588	Nonautonomous:Gypsy	Tekay	yes	GAG|Tekay PROT|Tekay RT|Tekay RH|Tekay INT|Tekay CHD|Tekay
NC_029262.1-17329760-17334685-Oryza_sativa_Japonica	NC_029262.1	17329760	17334685	4925	Nonautonomous:Copia	Ale	yes	GAG|Ale PROT|Ale INT|Ale RT|Ale RH|Ale
NC_029262.1-17365251-17370736-Oryza_sativa_Japonica	NC_029262.1	17365251	17370736	5485	Nonautonomous:Copia	Ale	yes	GAG|Ale PROT|Ale INT|Ale RT|Ale RH|Ale
NC_029262.1-17930939-17944938-Oryza_sativa_Japonica	NC_029262.1	17930939	17944938	13999	Nonautonomous:Gypsy	Tekay	yes	GAG|Tekay PROT|Tekay RT|Tekay RH|Tekay INT|Tekay CHD|Tekay
NC_029262.1-17959496-17972476-Oryza_sativa_Japonica	NC_029262.1	17959496	17972476	12980	Nonautonomous:Gypsy	Retand	yes	GAG|Retand PROT|Retand RT|Retand RH|Retand INT|Retand
NC_029262.1-18087800-18099113-Oryza_sativa_Japonica	NC_029262.1	18087800	18099113	11313	Nonautonomous:Gypsy	Retand	no	GAG|Retand PROT|Retand RT|Retand INT|Retand
NC_029262.1-18777739-18789959-Oryza_sativa_Japonica	NC_029262.1	18777739	18789959	12220	Autonomous:Gypsy	Retand	yes	GAG|Retand PROT|Retand RT|Retand RH|Retand INT|Retand
NC_029262.1-19165985-19179144-Oryza_sativa_Japonica	NC_029262.1	19165985	19179144	13159	Nonautonomous:Gypsy	Retand	yes	GAG|Retand PROT|Retand RT|Retand RH|Retand INT|Retand
NC_029262.1-19473911-19479389-Oryza_sativa_Japonica	NC_029262.1	19473911	19479389	5478	Nonautonomous:Gypsy	Reina	yes	GAG|Reina PROT|Reina RT|Reina RH|Reina INT|Reina CHD|Reina
NC_029262.1-19711638-19724780-Oryza_sativa_Japonica	NC_029262.1	19711638	19724780	13142	Nonautonomous:Gypsy	Retand	yes	GAG|Retand PROT|Retand RT|Retand RH|Retand INT|Retand
NC_029262.1-19867266-19880152-Oryza_sativa_Japonica	NC_029262.1	19867266	19880152	12886	Nonautonomous:Gypsy	Retand	yes	GAG|Retand PROT|Retand RT|Retand RH|Retand INT|Retand
NC_029262.1-19989490-19995173-Oryza_sativa_Japonica	NC_029262.1	19989490	19995173	5683	Nonautonomous:Gypsy	Reina	yes	GAG|Reina PROT|Reina RT|Reina RH|Reina INT|Reina CHD|Reina
NC_029262.1-20056191-20059830-Oryza_sativa_Japonica	NC_029262.1	20056191	20059830	3639	Nonautonomous:Copia	Ale	no	INT|Ale RT|Ale RH|Ale
NC_029262.1-20242034-20247536-Oryza_sativa_Japonica	NC_029262.1	20242034	20247536	5502	Nonautonomous:Gypsy	Retand	no	GAG|Retand INT|Retand RH|Retand
NC_029262.1-20641776-20646970-Oryza_sativa_Japonica	NC_029262.1	20641776	20646970	5194	Nonautonomous:Copia	Ivana	yes	GAG|Ivana PROT|Ivana INT|Ivana RT|Ivana RH|Ivana
NC_029262.1-20662286-20674046-Oryza_sativa_Japonica	NC_029262.1	20662286	20674046	11760	Nonautonomous:Gypsy	Tekay	no	GAG|Tekay
NC_029262.1-20853355-20866264-Oryza_sativa_Japonica	NC_029262.1	20853355	20866264	12909	Nonautonomous:Gypsy	Retand	yes	GAG|Retand PROT|Retand RT|Retand RH|Retand INT|Retand
NC_029262.1-21190719-21201256-Oryza_sativa_Japonica	NC_029262.1	21190719	21201256	10537	Nonautonomous:Gypsy	Tekay	no	GAG|Tekay
NC_029262.1-21532161-21538453-Oryza_sativa_Japonica	NC_029262.1	21532161	21538453	6292	Nonautonomous:Copia	Ikeros	yes	GAG|Ikeros PROT|Ikeros INT|Ikeros RT|Ikeros RH|Ikeros
NC_029262.1-21544775-21550203-Oryza_sativa_Japonica	NC_029262.1	21544775	21550203	5428	Nonautonomous:Gypsy	Retand	no	GAG|Retand INT|Retand RH|Retand
NC_029262.1-21993277-21997695-Oryza_sativa_Japonica	NC_029262.1	21993277	21997695	4418	Nonautonomous:Copia	Ale	no	PROT|Ale INT|Ale RT|Ale RH|Ale
NC_029262.1-22279489-22292371-Oryza_sativa_Japonica	NC_029262.1	22279489	22292371	12882	Nonautonomous:Gypsy	Retand	yes	GAG|Retand PROT|Retand RT|Retand RH|Retand INT|Retand
NC_029262.1-22703664-22715085-Oryza_sativa_Japonica	NC_029262.1	22703664	22715085	11421	Nonautonomous:Gypsy	Retand	no	GAG|Retand PROT|Retand RT|Retand INT|Retand
NC_029262.1-23015848-23027193-Oryza_sativa_Japonica	NC_029262.1	23015848	23027193	11345	Nonautonomous:Gypsy	Tekay	yes	GAG|Tekay PROT|Tekay RT|Tekay RH|Tekay INT|Tekay CHD|Tekay
NC_029262.1-23131872-23144179-Oryza_sativa_Japonica	NC_029262.1	23131872	23144179	12307	Nonautonomous:Gypsy	Retand	yes	GAG|Retand PROT|Retand RT|Retand RH|Retand INT|Retand
NC_029262.1-2382039-2387071-Oryza_sativa_Japonica	NC_029262.1	2382039	2387071	5032	Nonautonomous:Copia	Ivana	yes	GAG|Ivana PROT|Ivana INT|Ivana RT|Ivana RH|Ivana
NC_029262.1-24794988-24800353-Oryza_sativa_Japonica	NC_029262.1	24794988	24800353	5365	Nonautonomous:Copia	Ale	yes	GAG|Ale PROT|Ale INT|Ale RT|Ale RH|Ale
NC_029262.1-2496896-2502178-Oryza_sativa_Japonica	NC_029262.1	2496896	2502178	5282	Nonautonomous:Copia	Ivana	yes	GAG|Ivana PROT|Ivana INT|Ivana RT|Ivana RH|Ivana
NC_029262.1-25023164-25036347-Oryza_sativa_Japonica	NC_029262.1	25023164	25036347	13183	Nonautonomous:Gypsy	Retand	yes	GAG|Retand PROT|Retand RT|Retand RH|Retand INT|Retand
NC_029262.1-25417324-25422455-Oryza_sativa_Japonica	NC_029262.1	25417324	25422455	5131	Nonautonomous:Gypsy	Retand	no	GAG|Retand INT|Retand RH|Retand
NC_029262.1-26174981-26187718-Oryza_sativa_Japonica	NC_029262.1	26174981	26187718	12737	Nonautonomous:Gypsy	Retand	yes	GAG|Retand PROT|Retand RT|Retand RH|Retand INT|Retand
NC_029262.1-26520588-26527014-Oryza_sativa_Japonica	NC_029262.1	26520588	26527014	6426	Nonautonomous:Copia	Ikeros	yes	GAG|Ikeros PROT|Ikeros INT|Ikeros RT|Ikeros RH|Ikeros
NC_029262.1-268038-281912-Oryza_sativa_Japonica	NC_029262.1	268038	281912	13874	Nonautonomous:Gypsy	Tekay	yes	GAG|Tekay PROT|Tekay RT|Tekay RH|Tekay INT|Tekay CHD|Tekay
NC_029262.1-26837549-26843637-Oryza_sativa_Japonica	NC_029262.1	26837549	26843637	6088	Nonautonomous:Copia	Ikeros	no	GAG|Ikeros PROT|Ikeros RT|Ikeros RH|Ikeros
NC_029262.1-26862097-26873396-Oryza_sativa_Japonica	NC_029262.1	26862097	26873396	11299	Nonautonomous:Gypsy	Retand	yes	GAG|Retand PROT|Retand RT|Retand RH|Retand INT|Retand
NC_029262.1-27254903-27266209-Oryza_sativa_Japonica	NC_029262.1	27254903	27266209	11306	Nonautonomous:Gypsy	Retand	yes	GAG|Retand PROT|Retand RT|Retand RH|Retand INT|Retand
NC_029262.1-27321262-27327409-Oryza_sativa_Japonica	NC_029262.1	27321262	27327409	6147	Nonautonomous:Copia	Ikeros	no	GAG|Ikeros PROT|Ikeros RT|Ikeros RH|Ikeros
NC_029262.1-28510597-28521902-Oryza_sativa_Japonica	NC_029262.1	28510597	28521902	11305	Nonautonomous:Gypsy	Retand	yes	GAG|Retand PROT|Retand RT|Retand RH|Retand INT|Retand
NC_029262.1-28662835-28668493-Oryza_sativa_Japonica	NC_029262.1	28662835	28668493	5658	Nonautonomous:Gypsy	Reina	yes	GAG|Reina PROT|Reina RT|Reina RH|Reina INT|Reina CHD|Reina
NC_029262.1-2907696-2919768-Oryza_sativa_Japonica	NC_029262.1	2907696	2919768	12072	Nonautonomous:Gypsy	Tekay	yes	GAG|Tekay PROT|Tekay RT|Tekay RH|Tekay INT|Tekay CHD|Tekay
NC_029262.1-313097-325019-Oryza_sativa_Japonica	NC_029262.1	313097	325019	11922	Autonomous:Gypsy	Retand	yes	GAG|Retand PROT|Retand RT|Retand RH|Retand INT|Retand
NC_029262.1-3930082-3937355-Oryza_sativa_Japonica	NC_029262.1	3930082	3937355	7273	Nonautonomous:Gypsy	Retand	no	GAG|Retand PROT|Retand
NC_029262.1-4242609-4247820-Oryza_sativa_Japonica	NC_029262.1	4242609	4247820	5211	Nonautonomous:Gypsy	Reina	yes	GAG|Reina PROT|Reina RT|Reina RH|Reina INT|Reina CHD|Reina
NC_029262.1-4445899-4454892-Oryza_sativa_Japonica	NC_029262.1	4445899	4454892	8993	Nonautonomous:Gypsy	Reina	yes	GAG|Reina PROT|Reina RT|Reina RH|Reina INT|Reina CHD|Reina
NC_029262.1-5915353-5919132-Oryza_sativa_Japonica	NC_029262.1	5915353	5919132	3779	Nonautonomous:Copia	Ale	no	INT|Ale RT|Ale RH|Ale
NC_029262.1-5959774-5963900-Oryza_sativa_Japonica	NC_029262.1	5959774	5963900	4126	Nonautonomous:Copia	Ikeros	no	PROT|Ikeros RT|Ikeros RH|Ikeros
NC_029262.1-6160752-6172143-Oryza_sativa_Japonica	NC_029262.1	6160752	6172143	11391	Nonautonomous:Gypsy	Retand	yes	GAG|Retand PROT|Retand RT|Retand RH|Retand INT|Retand
NC_029262.1-6302938-6312613-Oryza_sativa_Japonica	NC_029262.1	6302938	6312613	9675	Nonautonomous:Gypsy	Retand	no	PROT|Retand RH|Retand INT|Retand
NC_029262.1-6884133-6889486-Oryza_sativa_Japonica	NC_029262.1	6884133	6889486	5353	Nonautonomous:Gypsy	Reina	yes	GAG|Reina PROT|Reina RT|Reina RH|Reina INT|Reina CHD|Reina
NC_029262.1-6993419-6998981-Oryza_sativa_Japonica	NC_029262.1	6993419	6998981	5562	Nonautonomous:Copia	TAR	no	PROT|TAR INT|TAR RT|TAR RH|TAR
NC_029262.1-7010811-7024231-Oryza_sativa_Japonica	NC_029262.1	7010811	7024231	13420	Nonautonomous:Gypsy	Tekay	yes	GAG|Tekay PROT|Tekay RT|Tekay RH|Tekay INT|Tekay
NC_029262.1-7357375-7363854-Oryza_sativa_Japonica	NC_029262.1	7357375	7363854	6479	Nonautonomous:Copia	TAR	yes	GAG|TAR PROT|TAR INT|TAR RT|TAR RH|TAR
NC_029262.1-7769898-7779549-Oryza_sativa_Japonica	NC_029262.1	7769898	7779549	9651	Autonomous:Copia	Ale	yes	GAG|CRM PROT|Ale INT|Ale RT|Ale RH|Ale
NC_029262.1-8225936-8230602-Oryza_sativa_Japonica	NC_029262.1	8225936	8230602	4666	Nonautonomous:Copia	Tork	yes	GAG|Tork PROT|Tork INT|Tork RT|Tork RH|Tork
NC_029262.1-8457774-8464213-Oryza_sativa_Japonica	NC_029262.1	8457774	8464213	6439	Nonautonomous:Copia	Ikeros	yes	GAG|Ikeros PROT|Ikeros INT|Ikeros RT|Ikeros RH|Ikeros
NC_029262.1-8634924-8648620-Oryza_sativa_Japonica	NC_029262.1	8634924	8648620	13696	Nonautonomous:Gypsy	Tekay	yes	GAG|Tekay PROT|Tekay RT|Tekay RH|Tekay INT|Tekay CHD|Tekay
NC_029262.1-8760616-8772379-Oryza_sativa_Japonica	NC_029262.1	8760616	8772379	11763	Nonautonomous:Gypsy	Tekay	yes	GAG|Tekay PROT|Tekay RT|Tekay RH|Tekay INT|Tekay CHD|Tekay
NC_029262.1-8788995-8795335-Oryza_sativa_Japonica	NC_029262.1	8788995	8795335	6340	Nonautonomous:Copia	SIRE	no	GAG|SIRE
NC_029262.1-9013328-9018709-Oryza_sativa_Japonica	NC_029262.1	9013328	9018709	5381	Nonautonomous:Copia	Ale	yes	GAG|Ale PROT|Ale INT|Ale RT|Ale RH|Ale
NC_029262.1-9054970-9067881-Oryza_sativa_Japonica	NC_029262.1	9054970	9067881	12911	Nonautonomous:Gypsy	Retand	yes	GAG|Retand PROT|Retand RT|Retand RH|Retand INT|Retand
NC_029262.1-9656106-9667384-Oryza_sativa_Japonica	NC_029262.1	9656106	9667384	11278	Nonautonomous:Gypsy	Retand	yes	GAG|Retand PROT|Retand RT|Retand RH|Retand INT|Retand
NC_029262.1-9940856-9952892-Oryza_sativa_Japonica	NC_029262.1	9940856	9952892	12036	Autonomous:Gypsy	Tekay	yes	GAG|Tekay PROT|Tekay RT|Tekay RH|Tekay INT|Tekay CHD|Tekay
NC_029263.1-10447677-10453224-Oryza_sativa_Japonica	NC_029263.1	10447677	10453224	5547	Nonautonomous:Gypsy	Retand	no	GAG|Retand
NC_029263.1-10692159-10701269-Oryza_sativa_Japonica	NC_029263.1	10692159	10701269	9110	Nonautonomous:Gypsy	Retand	no	GAG|Retand RH|Retand INT|Retand
NC_029263.1-10859256-10865621-Oryza_sativa_Japonica	NC_029263.1	10859256	10865621	6365	Nonautonomous:Copia	Angela	yes	GAG|Angela PROT|Angela INT|Angela RT|Angela RH|Angela
NC_029263.1-11025249-11030127-Oryza_sativa_Japonica	NC_029263.1	11025249	11030127	4878	Nonautonomous:Copia	Ale	yes	GAG|Ale PROT|Ale INT|Ale RT|Ale RH|Ale
NC_029263.1-11595907-11601496-Oryza_sativa_Japonica	NC_029263.1	11595907	11601496	5589	Nonautonomous:Gypsy	Retand	no	GAG|Retand INT|Retand
NC_029263.1-1162160-1178556-Oryza_sativa_Japonica	NC_029263.1	1162160	1178556	16396	Nonautonomous:Gypsy	CRM	yes	GAG|CRM PROT|CRM RT|CRM RH|CRM INT|CRM CHDCR|CRM
NC_029263.1-12025102-12026859-Oryza_sativa_Japonica	NC_029263.1	12025102	12026859	1757	Nonautonomous:Unknown	none	none	none
NC_029263.1-12132243-12139950-Oryza_sativa_Japonica	NC_029263.1	12132243	12139950	7707	Nonautonomous:Gypsy	CRM	yes	GAG|CRM PROT|CRM RT|CRM RH|CRM INT|CRM CHDCR|CRM
NC_029263.1-12502537-12514607-Oryza_sativa_Japonica	NC_029263.1	12502537	12514607	12070	Nonautonomous:Gypsy	Tekay	yes	GAG|Tekay PROT|Tekay RT|Tekay RH|Tekay INT|Tekay CHD|Tekay
NC_029263.1-12535871-12545074-Oryza_sativa_Japonica	NC_029263.1	12535871	12545074	9203	Nonautonomous:Unknown	none	none	none
NC_029263.1-12665752-12678682-Oryza_sativa_Japonica	NC_029263.1	12665752	12678682	12930	Nonautonomous:Gypsy	Retand	yes	GAG|Retand PROT|Retand RT|Retand RH|Retand INT|Retand
NC_029263.1-12955566-12963410-Oryza_sativa_Japonica	NC_029263.1	12955566	12963410	7844	Nonautonomous:Gypsy	CRM	yes	GAG|CRM PROT|CRM RT|CRM RH|CRM INT|CRM CHDCR|CRM
NC_029263.1-1303378-1309051-Oryza_sativa_Japonica	NC_029263.1	1303378	1309051	5673	Nonautonomous:Gypsy	Reina	yes	GAG|Reina PROT|Reina RT|Reina RH|Reina INT|Reina CHD|Reina
NC_029263.1-13184550-13192178-Oryza_sativa_Japonica	NC_029263.1	13184550	13192178	7628	Nonautonomous:Gypsy	CRM	yes	GAG|CRM PROT|CRM RT|CRM RH|CRM INT|CRM CHDCR|CRM
NC_029263.1-13254374-13264883-Oryza_sativa_Japonica	NC_029263.1	13254374	13264883	10509	Nonautonomous:Gypsy	Ogre	no	PROT|Ogre RT|Ogre RH|Ogre INT|Ogre
NC_029263.1-13276557-13284184-Oryza_sativa_Japonica	NC_029263.1	13276557	13284184	7627	Nonautonomous:Gypsy	CRM	yes	GAG|CRM PROT|CRM RT|CRM RH|CRM INT|CRM CHDCR|CRM
NC_029263.1-13445882-13456591-Oryza_sativa_Japonica	NC_029263.1	13445882	13456591	10709	Nonautonomous:Gypsy	Retand	no	GAG|Retand RT|Retand RH|Retand INT|Retand
NC_029263.1-13460129-13467893-Oryza_sativa_Japonica	NC_029263.1	13460129	13467893	7764	Nonautonomous:Gypsy	CRM	yes	GAG|CRM PROT|CRM RT|CRM RH|CRM INT|CRM CHDCR|CRM
NC_029263.1-13525843-13534131-Oryza_sativa_Japonica	NC_029263.1	13525843	13534131	8288	Nonautonomous:Gypsy	CRM	yes	GAG|CRM PROT|CRM RT|CRM RH|CRM INT|CRM CHDCR|CRM
NC_029263.1-13606106-13617434-Oryza_sativa_Japonica	NC_029263.1	13606106	13617434	11328	Nonautonomous:Gypsy	Retand	yes	GAG|Retand PROT|Retand RT|Retand RH|Retand INT|Retand
NC_029263.1-13716518-13728593-Oryza_sativa_Japonica	NC_029263.1	13716518	13728593	12075	Nonautonomous:Gypsy	Tekay	yes	GAG|Tekay PROT|Tekay RT|Tekay RH|Tekay INT|Tekay CHD|Tekay
NC_029263.1-13860246-13862257-Oryza_sativa_Japonica	NC_029263.1	13860246	13862257	2011	Nonautonomous:Unknown	none	none	none
NC_029263.1-13882307-13906463-Oryza_sativa_Japonica	NC_029263.1	13882307	13906463	24156	Nonautonomous:Gypsy	Tekay	no	INT|Tekay PROT|Tekay RT|Tekay RH|Tekay CHD|Tekay GAG|Tekay
NC_029263.1-13888297-13900373-Oryza_sativa_Japonica	NC_029263.1	13888297	13900373	12076	Nonautonomous:Gypsy	Tekay	yes	GAG|Tekay PROT|Tekay RT|Tekay RH|Tekay INT|Tekay CHD|Tekay
NC_029263.1-1428593-1440666-Oryza_sativa_Japonica	NC_029263.1	1428593	1440666	12073	Nonautonomous:Gypsy	Tekay	yes	GAG|Tekay PROT|Tekay RT|Tekay RH|Tekay INT|Tekay CHD|Tekay
NC_029263.1-14624102-14634691-Oryza_sativa_Japonica	NC_029263.1	14624102	14634691	10589	Nonautonomous:Unknown	none	none	none
NC_029263.1-14641422-14652776-Oryza_sativa_Japonica	NC_029263.1	14641422	14652776	11354	Nonautonomous:Gypsy	Retand	yes	GAG|Retand PROT|Retand RT|Retand RH|Retand INT|Retand
NC_029263.1-14793312-14799086-Oryza_sativa_Japonica	NC_029263.1	14793312	14799086	5774	Nonautonomous:Copia	Ikeros	yes	GAG|Ikeros PROT|Ikeros INT|Ikeros RT|Ikeros RH|Ikeros
NC_029263.1-14816287-14827479-Oryza_sativa_Japonica	NC_029263.1	14816287	14827479	11192	Nonautonomous:Unknown	none	none	none
NC_029263.1-1488959-1500281-Oryza_sativa_Japonica	NC_029263.1	1488959	1500281	11322	Nonautonomous:Gypsy	Retand	yes	GAG|Retand PROT|Retand RT|Retand RH|Retand INT|Retand
NC_029263.1-15042539-15055505-Oryza_sativa_Japonica	NC_029263.1	15042539	15055505	12966	Nonautonomous:Gypsy	Retand	yes	GAG|Retand PROT|Retand RT|Retand RH|Retand INT|Retand
NC_029263.1-15280437-15288948-Oryza_sativa_Japonica	NC_029263.1	15280437	15288948	8511	Nonautonomous:Copia	Ikeros	no	GAG|Ikeros
NC_029263.1-15523852-15534501-Oryza_sativa_Japonica	NC_029263.1	15523852	15534501	10649	Nonautonomous:Unknown	none	none	none
NC_029263.1-15600178-15605427-Oryza_sativa_Japonica	NC_029263.1	15600178	15605427	5249	Nonautonomous:Gypsy	Reina	yes	GAG|Reina PROT|Reina RT|Reina RH|Reina INT|Reina CHD|Reina
NC_029263.1-15799871-15811289-Oryza_sativa_Japonica	NC_029263.1	15799871	15811289	11418	Nonautonomous:Gypsy	Retand	yes	GAG|Retand PROT|Retand RT|Retand RH|Retand INT|Retand
NC_029263.1-16136984-16143423-Oryza_sativa_Japonica	NC_029263.1	16136984	16143423	6439	Nonautonomous:Copia	Ivana	yes	GAG|Ivana PROT|Ivana INT|Ivana RT|Ivana RH|Ivana
NC_029263.1-16649752-16661052-Oryza_sativa_Japonica	NC_029263.1	16649752	16661052	11300	Nonautonomous:Gypsy	Retand	yes	GAG|Retand PROT|Retand RT|Retand RH|Retand INT|Retand
NC_029263.1-17928827-17940913-Oryza_sativa_Japonica	NC_029263.1	17928827	17940913	12086	Nonautonomous:Gypsy	Tekay	yes	GAG|Tekay PROT|Tekay RT|Tekay RH|Tekay INT|Tekay CHD|Tekay
NC_029263.1-18109895-18119107-Oryza_sativa_Japonica	NC_029263.1	18109895	18119107	9212	Nonautonomous:Gypsy	Retand	yes	GAG|Retand PROT|Retand RT|Retand RH|Retand INT|Retand
NC_029263.1-18122335-18127591-Oryza_sativa_Japonica	NC_029263.1	18122335	18127591	5256	Nonautonomous:Copia	Ale	yes	GAG|Ale PROT|Ale INT|Ale RT|Ale RH|Ale
NC_029263.1-18380588-18391886-Oryza_sativa_Japonica	NC_029263.1	18380588	18391886	11298	Nonautonomous:Gypsy	Retand	yes	GAG|Retand PROT|Retand RT|Retand RH|Retand INT|Retand
NC_029263.1-18414661-18419875-Oryza_sativa_Japonica	NC_029263.1	18414661	18419875	5214	Nonautonomous:Copia	Ivana	yes	GAG|Ivana PROT|Ivana INT|Ivana RT|Ivana RH|Ivana
NC_029263.1-18420831-18427748-Oryza_sativa_Japonica	NC_029263.1	18420831	18427748	6917	Nonautonomous:Copia	Ikeros	yes	GAG|Ikeros PROT|Ikeros INT|Ikeros RT|Ikeros RH|Ikeros
NC_029263.1-1848083-1853080-Oryza_sativa_Japonica	NC_029263.1	1848083	1853080	4997	Autonomous:Copia	Ivana	yes	GAG|Ivana PROT|Ivana INT|Ivana RT|Ivana RH|Ivana
NC_029263.1-1862665-1881080-Oryza_sativa_Japonica	NC_029263.1	1862665	1881080	18415	Nonautonomous:Gypsy	Retand	yes	GAG|Retand PROT|Retand RT|Retand RH|Retand INT|Retand
NC_029263.1-18638935-18645297-Oryza_sativa_Japonica	NC_029263.1	18638935	18645297	6362	Nonautonomous:Copia	SIRE	no	GAG|SIRE
NC_029263.1-1867093-1878513-Oryza_sativa_Japonica	NC_029263.1	1867093	1878513	11420	Nonautonomous:Gypsy	Retand	yes	GAG|Retand PROT|Retand RT|Retand RH|Retand INT|Retand
NC_029263.1-1881698-1897572-Oryza_sativa_Japonica	NC_029263.1	1881698	1897572	15874	Nonautonomous:Gypsy	Retand	yes	GAG|Retand PROT|Retand RT|Retand RH|Retand INT|Retand
NC_029263.1-18921918-18927524-Oryza_sativa_Japonica	NC_029263.1	18921918	18927524	5606	Nonautonomous:Gypsy	Reina	yes	GAG|Reina PROT|Reina RT|Reina RH|Reina INT|Reina CHD|Reina
NC_029263.1-19247615-19259422-Oryza_sativa_Japonica	NC_029263.1	19247615	19259422	11807	Nonautonomous:Copia	SIRE	yes	GAG|SIRE PROT|SIRE INT|SIRE RT|SIRE RH|SIRE
NC_029263.1-19861798-19873287-Oryza_sativa_Japonica	NC_029263.1	19861798	19873287	11489	Nonautonomous:Gypsy	Retand	yes	GAG|Retand PROT|Retand RT|Retand RH|Retand INT|Retand
NC_029263.1-20510286-20522239-Oryza_sativa_Japonica	NC_029263.1	20510286	20522239	11953	Nonautonomous:Copia	SIRE	yes	GAG|SIRE PROT|SIRE INT|SIRE RT|SIRE RH|SIRE
NC_029263.1-20951381-20964562-Oryza_sativa_Japonica	NC_029263.1	20951381	20964562	13181	Nonautonomous:Gypsy	Retand	yes	GAG|Retand PROT|Retand RT|Retand RH|Retand INT|Retand
NC_029263.1-21526178-21531282-Oryza_sativa_Japonica	NC_029263.1	21526178	21531282	5104	Autonomous:Copia	Ale	yes	GAG|Ale PROT|Ale INT|Ale RT|Ale RH|Ale
NC_029263.1-2214958-2228998-Oryza_sativa_Japonica	NC_029263.1	2214958	2228998	14040	Nonautonomous:Gypsy	Tekay	yes	GAG|Tekay PROT|Tekay RT|Tekay RH|Tekay INT|Tekay CHD|Tekay
NC_029263.1-23099974-23110316-Oryza_sativa_Japonica	NC_029263.1	23099974	23110316	10342	Nonautonomous:Gypsy	Tekay	yes	GAG|Tekay PROT|Tekay RT|Tekay RH|Tekay INT|Tekay CHD|Tekay
NC_029263.1-23361630-23374491-Oryza_sativa_Japonica	NC_029263.1	23361630	23374491	12861	Nonautonomous:Gypsy	Retand	yes	GAG|Retand PROT|Retand RT|Retand RH|Retand INT|Retand
NC_029263.1-2346614-2365338-Oryza_sativa_Japonica	NC_029263.1	2346614	2365338	18724	Nonautonomous:Gypsy	Tekay	yes	GAG|Tekay PROT|Tekay RT|Tekay RH|Tekay INT|Tekay CHD|Tekay
NC_029263.1-23766915-23778486-Oryza_sativa_Japonica	NC_029263.1	23766915	23778486	11571	Nonautonomous:Gypsy	Retand	yes	GAG|Retand PROT|Retand RT|Retand RH|Retand INT|Retand
NC_029263.1-24415979-24421162-Oryza_sativa_Japonica	NC_029263.1	24415979	24421162	5183	Nonautonomous:Copia	Ivana	yes	GAG|Ivana PROT|Ivana INT|Ivana RT|Ivana RH|Ivana
NC_029263.1-2556362-2566650-Oryza_sativa_Japonica	NC_029263.1	2556362	2566650	10288	Nonautonomous:Copia	Ikeros	yes	GAG|Ikeros PROT|Ikeros INT|Ikeros RT|Ikeros RH|Ikeros
NC_029263.1-25668342-25674145-Oryza_sativa_Japonica	NC_029263.1	25668342	25674145	5803	Nonautonomous:Copia	Ivana	yes	GAG|Ivana PROT|Ivana INT|Ivana RT|Ivana RH|Ivana
NC_029263.1-25723350-25728439-Oryza_sativa_Japonica	NC_029263.1	25723350	25728439	5089	Nonautonomous:Copia	Tork	yes	GAG|Tork PROT|Tork INT|Tork RT|Tork RH|Tork
NC_029263.1-25806702-25816993-Oryza_sativa_Japonica	NC_029263.1	25806702	25816993	10291	Nonautonomous:Gypsy	Retand	yes	GAG|Retand PROT|Retand RT|Retand RH|Retand INT|Retand
NC_029263.1-25943613-25948414-Oryza_sativa_Japonica	NC_029263.1	25943613	25948414	4801	Nonautonomous:Copia	Ale	yes	GAG|Ale PROT|Ale INT|Ale RT|Ale RH|Ale
NC_029263.1-2646170-2657490-Oryza_sativa_Japonica	NC_029263.1	2646170	2657490	11320	Nonautonomous:Gypsy	Retand	yes	GAG|Retand PROT|Retand RT|Retand RH|Retand INT|Retand
NC_029263.1-26620694-26633581-Oryza_sativa_Japonica	NC_029263.1	26620694	26633581	12887	Nonautonomous:Gypsy	Retand	yes	GAG|Retand PROT|Retand RT|Retand RH|Retand INT|Retand
NC_029263.1-2721748-2732363-Oryza_sativa_Japonica	NC_029263.1	2721748	2732363	10615	Nonautonomous:Unknown	none	none	none
NC_029263.1-27977825-27990787-Oryza_sativa_Japonica	NC_029263.1	27977825	27990787	12962	Autonomous:Gypsy	Retand	yes	GAG|Retand PROT|Retand RT|Retand RH|Retand INT|Retand
NC_029263.1-28025146-28038017-Oryza_sativa_Japonica	NC_029263.1	28025146	28038017	12871	Nonautonomous:Gypsy	Retand	yes	GAG|Retand PROT|Retand RT|Retand RH|Retand INT|Retand
NC_029263.1-3791969-3797868-Oryza_sativa_Japonica	NC_029263.1	3791969	3797868	5899	Nonautonomous:Gypsy	Reina	yes	GAG|Reina PROT|Reina RT|Reina RH|Reina INT|Reina CHD|Reina
NC_029263.1-4023181-4033781-Oryza_sativa_Japonica	NC_029263.1	4023181	4033781	10600	Nonautonomous:Gypsy	Retand	no	GAG|Retand RT|Retand RH|Retand INT|Retand
NC_029263.1-4424796-4430245-Oryza_sativa_Japonica	NC_029263.1	4424796	4430245	5449	Nonautonomous:Copia	Ale	yes	GAG|Ale PROT|Ale INT|Ale RT|Ale RH|Ale
NC_029263.1-5494718-5505056-Oryza_sativa_Japonica	NC_029263.1	5494718	5505056	10338	Nonautonomous:Gypsy	Retand	yes	GAG|Retand PROT|Retand RT|Retand RH|Retand INT|Retand
NC_029263.1-5507562-5516842-Oryza_sativa_Japonica	NC_029263.1	5507562	5516842	9280	Nonautonomous:Copia	SIRE	yes	GAG|SIRE PROT|SIRE INT|SIRE RT|SIRE RH|SIRE
NC_029263.1-5824391-5835718-Oryza_sativa_Japonica	NC_029263.1	5824391	5835718	11327	Nonautonomous:Gypsy	Retand	yes	GAG|Retand PROT|Retand RT|Retand RH|Retand INT|Retand
NC_029263.1-5894299-5905591-Oryza_sativa_Japonica	NC_029263.1	5894299	5905591	11292	Nonautonomous:Gypsy	Retand	yes	GAG|Retand PROT|Retand RT|Retand RH|Retand INT|Retand
NC_029263.1-6328262-6334282-Oryza_sativa_Japonica	NC_029263.1	6328262	6334282	6020	Nonautonomous:Gypsy	Reina	yes	GAG|Reina PROT|Reina RT|Reina RH|Reina INT|Reina CHD|Reina
NC_029263.1-6341140-6346529-Oryza_sativa_Japonica	NC_029263.1	6341140	6346529	5389	Autonomous:Copia	Ale	yes	GAG|Ale PROT|Ale INT|Ale RT|Ale RH|Ale
NC_029263.1-6372444-6383581-Oryza_sativa_Japonica	NC_029263.1	6372444	6383581	11137	Nonautonomous:Unknown	none	none	none
NC_029263.1-6512435-6523528-Oryza_sativa_Japonica	NC_029263.1	6512435	6523528	11093	Nonautonomous:Unknown	none	none	none
NC_029263.1-6628811-6640101-Oryza_sativa_Japonica	NC_029263.1	6628811	6640101	11290	Nonautonomous:Gypsy	Tekay	no	GAG|Tekay
NC_029263.1-7169971-7181965-Oryza_sativa_Japonica	NC_029263.1	7169971	7181965	11994	Nonautonomous:Gypsy	Tekay	no	PROT|Tekay RT|Tekay RH|Tekay INT|Tekay CHD|Tekay
NC_029263.1-7282625-7294154-Oryza_sativa_Japonica	NC_029263.1	7282625	7294154	11529	Nonautonomous:Gypsy	Tekay	yes	GAG|Tekay PROT|Tekay RT|Tekay RH|Tekay INT|Tekay CHD|Tekay
NC_029263.1-7307131-7318409-Oryza_sativa_Japonica	NC_029263.1	7307131	7318409	11278	Nonautonomous:Gypsy	Retand	yes	GAG|Retand PROT|Retand RT|Retand RH|Retand INT|Retand
NC_029263.1-7429844-7440779-Oryza_sativa_Japonica	NC_029263.1	7429844	7440779	10935	Nonautonomous:Unknown	none	none	none
NC_029263.1-7674858-7686265-Oryza_sativa_Japonica	NC_029263.1	7674858	7686265	11407	Nonautonomous:Gypsy	Retand	yes	GAG|Retand PROT|Retand RT|Retand RH|Retand INT|Retand
NC_029263.1-8030739-8041753-Oryza_sativa_Japonica	NC_029263.1	8030739	8041753	11014	Nonautonomous:Gypsy	Retand	no	GAG|Retand PROT|Retand RT|Retand RH|Retand INT|Retand
NC_029263.1-8048874-8060252-Oryza_sativa_Japonica	NC_029263.1	8048874	8060252	11378	Nonautonomous:Gypsy	Retand	no	GAG|Retand PROT|Retand RT|Retand INT|Retand
NC_029263.1-8091348-8102659-Oryza_sativa_Japonica	NC_029263.1	8091348	8102659	11311	Nonautonomous:Gypsy	Retand	yes	GAG|Retand PROT|Retand RT|Retand RH|Retand INT|Retand
NC_029263.1-8194624-8205924-Oryza_sativa_Japonica	NC_029263.1	8194624	8205924	11300	Nonautonomous:Gypsy	Retand	yes	GAG|Retand PROT|Retand RT|Retand RH|Retand INT|Retand
NC_029263.1-8688473-8701352-Oryza_sativa_Japonica	NC_029263.1	8688473	8701352	12879	Nonautonomous:Gypsy	Retand	yes	GAG|Retand PROT|Retand RT|Retand RH|Retand INT|Retand
NC_029263.1-8729791-8741867-Oryza_sativa_Japonica	NC_029263.1	8729791	8741867	12076	Nonautonomous:Gypsy	Tekay	yes	GAG|Tekay PROT|Tekay RT|Tekay RH|Tekay INT|Tekay CHD|Tekay
NC_029263.1-9149853-9161278-Oryza_sativa_Japonica	NC_029263.1	9149853	9161278	11425	Nonautonomous:Gypsy	Retand	no	GAG|Retand PROT|Retand RT|Retand INT|Retand
NC_029263.1-9297485-9307193-Oryza_sativa_Japonica	NC_029263.1	9297485	9307193	9708	Nonautonomous:Gypsy	Retand	yes	GAG|Retand PROT|Retand RT|Retand RH|Retand INT|Retand
NC_029263.1-9463509-9474820-Oryza_sativa_Japonica	NC_029263.1	9463509	9474820	11311	Nonautonomous:Gypsy	Retand	yes	GAG|Retand PROT|Retand RT|Retand RH|Retand INT|Retand
NC_029264.1-10353176-10361296-Oryza_sativa_Japonica	NC_029264.1	10353176	10361296	8120	Nonautonomous:Copia	Bianca	yes	GAG|Bianca PROT|Bianca INT|Bianca RT|Bianca RH|Bianca
NC_029264.1-10411794-10417066-Oryza_sativa_Japonica	NC_029264.1	10411794	10417066	5272	Nonautonomous:Copia	Ale	yes	GAG|Ale PROT|Ale INT|Ale RT|Ale RH|Ale
NC_029264.1-10501978-10513303-Oryza_sativa_Japonica	NC_029264.1	10501978	10513303	11325	Nonautonomous:Unknown	none	none	none
NC_029264.1-10885140-10890426-Oryza_sativa_Japonica	NC_029264.1	10885140	10890426	5286	Nonautonomous:Gypsy	Reina	yes	GAG|Reina PROT|Reina RT|Reina RH|Reina INT|Reina CHD|Reina
NC_029264.1-11542828-11555753-Oryza_sativa_Japonica	NC_029264.1	11542828	11555753	12925	Nonautonomous:Gypsy	Retand	yes	GAG|Retand PROT|Retand RT|Retand RH|Retand INT|Retand
NC_029264.1-12132761-12137692-Oryza_sativa_Japonica	NC_029264.1	12132761	12137692	4931	Nonautonomous:Copia	Ale	yes	GAG|Ale PROT|Ale INT|Ale RT|Ale RH|Ale
NC_029264.1-13077394-13088710-Oryza_sativa_Japonica	NC_029264.1	13077394	13088710	11316	Nonautonomous:Gypsy	Retand	yes	GAG|Retand PROT|Retand RT|Retand RH|Retand INT|Retand
NC_029264.1-13102529-13114118-Oryza_sativa_Japonica	NC_029264.1	13102529	13114118	11589	Nonautonomous:Gypsy	Tekay	yes	GAG|Tekay PROT|Tekay RT|Tekay RH|Tekay INT|Tekay CHD|Tekay
NC_029264.1-1473371-1487225-Oryza_sativa_Japonica	NC_029264.1	1473371	1487225	13854	Nonautonomous:Gypsy	Ogre	yes	GAG|Ogre PROT|Ogre RT|Ogre RH|Ogre INT|Ogre
NC_029264.1-14748832-14761363-Oryza_sativa_Japonica	NC_029264.1	14748832	14761363	12531	Nonautonomous:Gypsy	Retand	yes	GAG|Retand PROT|Retand RT|Retand RH|Retand INT|Retand
NC_029264.1-15728225-15740665-Oryza_sativa_Japonica	NC_029264.1	15728225	15740665	12440	Nonautonomous:Gypsy	Retand	yes	GAG|Retand PROT|Retand RT|Retand RH|Retand INT|Retand
NC_029264.1-15974995-15980464-Oryza_sativa_Japonica	NC_029264.1	15974995	15980464	5469	Autonomous:Gypsy	Reina	yes	GAG|Reina PROT|Reina RT|Reina RH|Reina INT|Reina CHD|Reina
NC_029264.1-16396710-16401558-Oryza_sativa_Japonica	NC_029264.1	16396710	16401558	4848	Nonautonomous:Copia	Ale	yes	GAG|Ale PROT|Ale INT|Ale RT|Ale RH|Ale
NC_029264.1-16890027-16904463-Oryza_sativa_Japonica	NC_029264.1	16890027	16904463	14436	Nonautonomous:Gypsy	Retand	yes	GAG|Retand PROT|Retand RT|Retand RH|Retand INT|Retand
NC_029264.1-172416-182944-Oryza_sativa_Japonica	NC_029264.1	172416	182944	10528	Nonautonomous:Unknown	none	none	none
NC_029264.1-17435191-17445532-Oryza_sativa_Japonica	NC_029264.1	17435191	17445532	10341	Nonautonomous:Copia	SIRE	yes	GAG|SIRE PROT|SIRE INT|SIRE RT|SIRE RH|SIRE
NC_029264.1-18059367-18064177-Oryza_sativa_Japonica	NC_029264.1	18059367	18064177	4810	Nonautonomous:Copia	Ale	yes	GAG|Ale PROT|Ale INT|Ale RT|Ale RH|Ale
NC_029264.1-18114574-18120327-Oryza_sativa_Japonica	NC_029264.1	18114574	18120327	5753	Autonomous:Copia	Ivana	yes	GAG|Ivana PROT|Ivana INT|Ivana RT|Ivana RH|Ivana
NC_029264.1-2099396-2112271-Oryza_sativa_Japonica	NC_029264.1	2099396	2112271	12875	Nonautonomous:Gypsy	Retand	yes	GAG|Retand PROT|Retand RT|Retand RH|Retand INT|Retand
NC_029264.1-2139932-2144579-Oryza_sativa_Japonica	NC_029264.1	2139932	2144579	4647	Nonautonomous:Gypsy	CRM	no	RT|CRM RH|CRM INT|CRM CHDCR|CRM
NC_029264.1-22578534-22591455-Oryza_sativa_Japonica	NC_029264.1	22578534	22591455	12921	Autonomous:Gypsy	Retand	yes	GAG|Retand PROT|Retand RT|Retand RH|Retand INT|Retand
NC_029264.1-22827828-22840176-Oryza_sativa_Japonica	NC_029264.1	22827828	22840176	12348	Nonautonomous:Gypsy	Retand	yes	GAG|Retand PROT|Retand RT|Retand RH|Retand INT|Retand
NC_029264.1-22866468-22879281-Oryza_sativa_Japonica	NC_029264.1	22866468	22879281	12813	Nonautonomous:Gypsy	Retand	yes	GAG|Retand PROT|Retand RT|Retand RH|Retand INT|Retand
NC_029264.1-2567643-2580302-Oryza_sativa_Japonica	NC_029264.1	2567643	2580302	12659	Nonautonomous:Gypsy	Retand	yes	GAG|Retand PROT|Retand RT|Retand RH|Retand INT|Retand
NC_029264.1-2662136-2668355-Oryza_sativa_Japonica	NC_029264.1	2662136	2668355	6219	Nonautonomous:Gypsy	Reina	yes	GAG|Reina PROT|Reina RT|Reina RH|Reina INT|Reina CHD|Reina
NC_029264.1-272105-283409-Oryza_sativa_Japonica	NC_029264.1	272105	283409	11304	Nonautonomous:Gypsy	Retand	yes	GAG|Retand PROT|Retand RT|Retand RH|Retand INT|Retand
NC_029264.1-2731736-2739513-Oryza_sativa_Japonica	NC_029264.1	2731736	2739513	7777	Nonautonomous:Gypsy	CRM	yes	GAG|CRM PROT|CRM RT|CRM RH|CRM INT|CRM CHDCR|CRM
NC_029264.1-3108205-3116684-Oryza_sativa_Japonica	NC_029264.1	3108205	3116684	8479	Nonautonomous:Gypsy	Retand	no	GAG|Retand PROT|Retand RT|Retand RH|Retand
NC_029264.1-314970-331288-Oryza_sativa_Japonica	NC_029264.1	314970	331288	16318	Nonautonomous:Copia	SIRE	no	PROT|SIRE INT|SIRE RT|SIRE
NC_029264.1-391044-407175-Oryza_sativa_Japonica	NC_029264.1	391044	407175	16131	Nonautonomous:Gypsy	Retand	yes	GAG|Retand PROT|Retand RT|Retand RH|Retand INT|Retand
NC_029264.1-391529-402571-Oryza_sativa_Japonica	NC_029264.1	391529	402571	11042	Nonautonomous:Gypsy	Retand	yes	GAG|Retand PROT|Retand RT|Retand RH|Retand INT|Retand
NC_029264.1-4231441-4246801-Oryza_sativa_Japonica	NC_029264.1	4231441	4246801	15360	Nonautonomous:Gypsy	Tekay	yes	GAG|Retand PROT|Tekay RT|Retand RH|Tekay INT|Tekay CHD|Tekay
NC_029264.1-4261304-4272669-Oryza_sativa_Japonica	NC_029264.1	4261304	4272669	11365	Nonautonomous:Gypsy	Retand	yes	GAG|Retand PROT|Retand RT|Retand RH|Retand INT|Retand
NC_029264.1-4419940-4425600-Oryza_sativa_Japonica	NC_029264.1	4419940	4425600	5660	Nonautonomous:Gypsy	Reina	yes	GAG|Reina PROT|Reina RT|Reina RH|Reina INT|Reina CHD|Reina
NC_029264.1-4511606-4524580-Oryza_sativa_Japonica	NC_029264.1	4511606	4524580	12974	Nonautonomous:Gypsy	Retand	yes	GAG|Retand PROT|Retand RT|Retand RH|Retand INT|Retand
NC_029264.1-4679865-4691182-Oryza_sativa_Japonica	NC_029264.1	4679865	4691182	11317	Nonautonomous:Gypsy	Retand	no	GAG|Retand PROT|Retand RT|Retand INT|Retand
NC_029264.1-4841491-4852239-Oryza_sativa_Japonica	NC_029264.1	4841491	4852239	10748	Nonautonomous:Unknown	none	none	none
NC_029264.1-4948720-4959754-Oryza_sativa_Japonica	NC_029264.1	4948720	4959754	11034	Nonautonomous:Gypsy	Retand	yes	GAG|Retand PROT|Retand RT|Retand RH|Retand INT|Retand
NC_029264.1-5223193-5234525-Oryza_sativa_Japonica	NC_029264.1	5223193	5234525	11332	Nonautonomous:Gypsy	Retand	yes	GAG|Retand PROT|Retand RT|Retand RH|Retand INT|Retand
NC_029264.1-5354160-5365437-Oryza_sativa_Japonica	NC_029264.1	5354160	5365437	11277	Nonautonomous:Gypsy	Retand	yes	GAG|Retand PROT|Retand RT|Retand RH|Retand INT|Retand
NC_029264.1-5717013-5729089-Oryza_sativa_Japonica	NC_029264.1	5717013	5729089	12076	Nonautonomous:Gypsy	Tekay	yes	GAG|Tekay PROT|Tekay RT|Tekay RH|Tekay INT|Tekay CHD|Tekay
NC_029264.1-6124449-6135752-Oryza_sativa_Japonica	NC_029264.1	6124449	6135752	11303	Nonautonomous:Gypsy	Retand	yes	GAG|Retand PROT|Retand RT|Retand RH|Retand INT|Retand
NC_029264.1-6408231-6424463-Oryza_sativa_Japonica	NC_029264.1	6408231	6424463	16232	Nonautonomous:Gypsy	Retand	no	GAG|Retand PROT|Retand RT|Retand INT|Retand
NC_029264.1-6445334-6450357-Oryza_sativa_Japonica	NC_029264.1	6445334	6450357	5023	Nonautonomous:Copia	Tork	yes	GAG|Tork PROT|Tork INT|Tork RT|Tork RH|Tork
NC_029264.1-6720624-6731974-Oryza_sativa_Japonica	NC_029264.1	6720624	6731974	11350	Nonautonomous:Gypsy	Retand	yes	GAG|Retand PROT|Retand RT|Retand RH|Retand INT|Retand
NC_029264.1-701134-713171-Oryza_sativa_Japonica	NC_029264.1	701134	713171	12037	Nonautonomous:Gypsy	Tekay	yes	GAG|Tekay PROT|Tekay RT|Tekay RH|Tekay INT|Tekay CHD|Tekay
NC_029264.1-7450908-7469422-Oryza_sativa_Japonica	NC_029264.1	7450908	7469422	18514	Nonautonomous:Copia	Ikeros	yes	GAG|Ikeros CHD|Tekay PROT|Ikeros INT|Ikeros RT|Ikeros RH|Ikeros
NC_029264.1-7455250-7467332-Oryza_sativa_Japonica	NC_029264.1	7455250	7467332	12082	Nonautonomous:Gypsy	Tekay	yes	GAG|Tekay PROT|Tekay RT|Tekay RH|Tekay INT|Tekay CHD|Tekay
NC_029264.1-757341-767608-Oryza_sativa_Japonica	NC_029264.1	757341	767608	10267	Nonautonomous:Gypsy	Retand	yes	GAG|Retand PROT|Retand RT|Retand RH|Retand INT|Retand
NC_029264.1-8052217-8064272-Oryza_sativa_Japonica	NC_029264.1	8052217	8064272	12055	Nonautonomous:Gypsy	Tekay	yes	GAG|Tekay PROT|Tekay RT|Tekay RH|Tekay INT|Tekay CHD|Tekay
NC_029264.1-8070242-8075034-Oryza_sativa_Japonica	NC_029264.1	8070242	8075034	4792	Nonautonomous:Copia	Ale	yes	GAG|Ale PROT|Ale INT|Ale RT|Ale RH|Ale
NC_029264.1-8354930-8369628-Oryza_sativa_Japonica	NC_029264.1	8354930	8369628	14698	Nonautonomous:Gypsy	Retand	yes	GAG|Retand PROT|Retand RT|Retand RH|Retand INT|Retand
NC_029264.1-8547591-8558194-Oryza_sativa_Japonica	NC_029264.1	8547591	8558194	10603	Autonomous:Copia	SIRE	yes	GAG|SIRE PROT|SIRE INT|SIRE RT|SIRE RH|SIRE
NC_029264.1-8572140-8577852-Oryza_sativa_Japonica	NC_029264.1	8572140	8577852	5712	Autonomous:Copia	Ivana	yes	GAG|Ivana PROT|Ivana INT|Ivana RT|Ivana RH|Ivana
NC_029264.1-8719595-8726027-Oryza_sativa_Japonica	NC_029264.1	8719595	8726027	6432	Nonautonomous:Copia	Ikeros	yes	GAG|Ikeros PROT|Ikeros INT|Ikeros RT|Ikeros RH|Ikeros
NC_029264.1-8749728-8760031-Oryza_sativa_Japonica	NC_029264.1	8749728	8760031	10303	Nonautonomous:Gypsy	Retand	no	GAG|Retand RT|Retand RH|Retand INT|Retand
NC_029264.1-8857952-8869286-Oryza_sativa_Japonica	NC_029264.1	8857952	8869286	11334	Nonautonomous:Gypsy	Retand	no	GAG|Retand PROT|Retand RH|Retand INT|Retand
NC_029264.1-9263935-9269462-Oryza_sativa_Japonica	NC_029264.1	9263935	9269462	5527	Nonautonomous:Gypsy	Reina	yes	GAG|Reina PROT|Reina RT|Reina RH|Reina INT|Reina CHD|Reina
NC_029264.1-9307964-9318201-Oryza_sativa_Japonica	NC_029264.1	9307964	9318201	10237	Nonautonomous:Gypsy	Retand	no	GAG|Retand PROT|Retand RT|Retand RH|Retand INT|Retand
NC_029264.1-9987204-9999743-Oryza_sativa_Japonica	NC_029264.1	9987204	9999743	12539	Nonautonomous:Gypsy	Tekay	yes	GAG|Tekay PROT|Tekay RT|Tekay RH|Tekay INT|Tekay CHD|Tekay
NC_029265.1-10060449-10071447-Oryza_sativa_Japonica	NC_029265.1	10060449	10071447	10998	Nonautonomous:Unknown	none	none	none
NC_029265.1-10284401-10292025-Oryza_sativa_Japonica	NC_029265.1	10284401	10292025	7624	Nonautonomous:Gypsy	CRM	yes	GAG|CRM PROT|CRM RT|CRM RH|CRM INT|CRM CHDCR|CRM
NC_029265.1-10363312-10375899-Oryza_sativa_Japonica	NC_029265.1	10363312	10375899	12587	Nonautonomous:Gypsy	Tekay	yes	GAG|Tekay PROT|Tekay RT|Tekay RH|Tekay INT|Tekay CHD|Tekay
NC_029265.1-1057189-1059745-Oryza_sativa_Japonica	NC_029265.1	1057189	1059745	2556	Nonautonomous:Copia	Ale	no	GAG|Ale RT|Ale RH|Ale
NC_029265.1-11328983-11335404-Oryza_sativa_Japonica	NC_029265.1	11328983	11335404	6421	Nonautonomous:Copia	Ikeros	yes	GAG|Ikeros PROT|Ikeros INT|Ikeros RT|Ikeros RH|Ikeros
NC_029265.1-12354669-12363093-Oryza_sativa_Japonica	NC_029265.1	12354669	12363093	8424	Nonautonomous:Gypsy	Retand	no	GAG|Retand PROT|Retand
NC_029265.1-12506517-12511872-Oryza_sativa_Japonica	NC_029265.1	12506517	12511872	5355	Nonautonomous:Gypsy	Reina	yes	GAG|Reina PROT|Reina RT|Reina RH|Reina INT|Reina CHD|Reina
NC_029265.1-12630264-12642968-Oryza_sativa_Japonica	NC_029265.1	12630264	12642968	12704	Nonautonomous:Gypsy	Tekay	yes	GAG|Tekay PROT|Tekay RT|Tekay RH|Tekay INT|Tekay CHD|Tekay
NC_029265.1-12714514-12726064-Oryza_sativa_Japonica	NC_029265.1	12714514	12726064	11550	Nonautonomous:Gypsy	Tekay	yes	GAG|Tekay PROT|Tekay RT|Tekay RH|Tekay INT|Tekay CHD|Tekay
NC_029265.1-12902624-12914033-Oryza_sativa_Japonica	NC_029265.1	12902624	12914033	11409	Nonautonomous:Gypsy	Retand	yes	GAG|Retand PROT|Retand RT|Retand RH|Retand INT|Retand
NC_029265.1-13197644-13209740-Oryza_sativa_Japonica	NC_029265.1	13197644	13209740	12096	Nonautonomous:Gypsy	Tekay	yes	GAG|Tekay PROT|Tekay RT|Tekay RH|Tekay INT|Tekay CHD|Tekay
NC_029265.1-13314819-13323307-Oryza_sativa_Japonica	NC_029265.1	13314819	13323307	8488	Nonautonomous:Gypsy	Tekay	yes	GAG|Tekay PROT|Tekay RT|Tekay RH|Tekay INT|Tekay CHD|Tekay
NC_029265.1-13472427-13478528-Oryza_sativa_Japonica	NC_029265.1	13472427	13478528	6101	Nonautonomous:Copia	Ivana	yes	GAG|Ivana PROT|Ivana INT|Ivana RT|Ivana RH|Ivana
NC_029265.1-14725121-14731132-Oryza_sativa_Japonica	NC_029265.1	14725121	14731132	6011	Nonautonomous:Gypsy	Reina	yes	GAG|Reina PROT|Reina RT|Reina RH|Reina INT|Reina CHD|Reina
NC_029265.1-15282163-15287391-Oryza_sativa_Japonica	NC_029265.1	15282163	15287391	5228	Nonautonomous:Copia	Ivana	yes	GAG|Ivana PROT|Ivana INT|Ivana RT|Ivana RH|Ivana
NC_029265.1-15711561-15724454-Oryza_sativa_Japonica	NC_029265.1	15711561	15724454	12893	Nonautonomous:Gypsy	Retand	yes	GAG|Retand PROT|Retand RT|Retand RH|Retand INT|Retand
NC_029265.1-15953015-15965928-Oryza_sativa_Japonica	NC_029265.1	15953015	15965928	12913	Nonautonomous:Gypsy	Retand	yes	GAG|Retand PROT|Retand RT|Retand RH|Retand INT|Retand
NC_029265.1-16744134-16749888-Oryza_sativa_Japonica	NC_029265.1	16744134	16749888	5754	Nonautonomous:Gypsy	Retand	no	GAG|Retand INT|Retand RH|Retand
NC_029265.1-1758145-1762873-Oryza_sativa_Japonica	NC_029265.1	1758145	1762873	4728	Autonomous:Copia	Ale	yes	GAG|Ale PROT|Ale INT|Ale RT|Ale RH|Ale
NC_029265.1-18208403-18213519-Oryza_sativa_Japonica	NC_029265.1	18208403	18213519	5116	Nonautonomous:Copia	Tork	yes	GAG|Tork PROT|Tork INT|Tork RT|Tork RH|Tork
NC_029265.1-18289869-18294306-Oryza_sativa_Japonica	NC_029265.1	18289869	18294306	4437	Nonautonomous:BARE-2	Ale	no	PROT|Ale INT|Ale RT|Ale RH|Ale
NC_029265.1-1879576-1884787-Oryza_sativa_Japonica	NC_029265.1	1879576	1884787	5211	Nonautonomous:Copia	Ivana	yes	GAG|Ivana PROT|Ivana INT|Ivana RT|Ivana RH|Ivana
NC_029265.1-18921499-18932538-Oryza_sativa_Japonica	NC_029265.1	18921499	18932538	11039	Nonautonomous:Gypsy	Retand	no	RT|Retand RH|Retand INT|Retand
NC_029265.1-1966798-1977719-Oryza_sativa_Japonica	NC_029265.1	1966798	1977719	10921	Nonautonomous:Gypsy	Retand	yes	GAG|Retand PROT|Retand RT|Retand RH|Retand INT|Retand
NC_029265.1-1979173-1986452-Oryza_sativa_Japonica	NC_029265.1	1979173	1986452	7279	Nonautonomous:Gypsy	Athila	no	GAG|Athila
NC_029265.1-19794918-19800615-Oryza_sativa_Japonica	NC_029265.1	19794918	19800615	5697	Nonautonomous:Gypsy	Reina	yes	GAG|Reina PROT|Reina RT|Reina RH|Reina INT|Reina CHD|Reina
NC_029265.1-21493388-21504699-Oryza_sativa_Japonica	NC_029265.1	21493388	21504699	11311	Nonautonomous:Gypsy	Retand	yes	GAG|Retand PROT|Retand RT|Retand RH|Retand INT|Retand
NC_029265.1-21506411-21517841-Oryza_sativa_Japonica	NC_029265.1	21506411	21517841	11430	Nonautonomous:Gypsy	Retand	yes	GAG|Retand PROT|Retand RT|Retand RH|Retand INT|Retand
NC_029265.1-21971868-21977804-Oryza_sativa_Japonica	NC_029265.1	21971868	21977804	5936	Nonautonomous:Gypsy	Reina	yes	GAG|Reina PROT|Reina RT|Reina RH|Reina INT|Reina CHD|Reina
NC_029265.1-22402721-22408478-Oryza_sativa_Japonica	NC_029265.1	22402721	22408478	5757	Nonautonomous:Copia	Ivana	yes	GAG|Ivana PROT|Ivana INT|Ivana RT|Ivana RH|Ivana
NC_029265.1-23117957-23123464-Oryza_sativa_Japonica	NC_029265.1	23117957	23123464	5507	Nonautonomous:Gypsy	Reina	yes	GAG|Reina PROT|Reina RT|Reina RH|Reina INT|Reina CHD|Reina
NC_029265.1-23162255-23168256-Oryza_sativa_Japonica	NC_029265.1	23162255	23168256	6001	Nonautonomous:Copia	Ikeros	no	GAG|Ikeros PROT|Ikeros RT|Ikeros RH|Ikeros
NC_029265.1-23311-38331-Oryza_sativa_Japonica	NC_029265.1	23311	38331	15020	Nonautonomous:Copia	SIRE	yes	GAG|SIRE PROT|SIRE INT|SIRE RT|SIRE RH|SIRE
NC_029265.1-3202142-3222037-Oryza_sativa_Japonica	NC_029265.1	3202142	3222037	19895	Nonautonomous:Gypsy	Tekay	yes	GAG|Tekay PROT|Tekay RT|Tekay RH|Tekay INT|Tekay CHD|Tekay
NC_029265.1-4132225-4146460-Oryza_sativa_Japonica	NC_029265.1	4132225	4146460	14235	Nonautonomous:Gypsy	Retand	yes	GAG|Retand PROT|Retand RT|Retand RH|Retand INT|Retand
NC_029265.1-4175642-4189877-Oryza_sativa_Japonica	NC_029265.1	4175642	4189877	14235	Nonautonomous:Gypsy	Retand	yes	GAG|Retand PROT|Retand RT|Retand RH|Retand INT|Retand
NC_029265.1-4483100-4488524-Oryza_sativa_Japonica	NC_029265.1	4483100	4488524	5424	Nonautonomous:Gypsy	Retand	no	GAG|Retand INT|Retand RH|Retand
NC_029265.1-4737811-4743729-Oryza_sativa_Japonica	NC_029265.1	4737811	4743729	5918	Nonautonomous:Copia	Ikeros	no	GAG|Ikeros PROT|Ikeros RT|Ikeros RH|Ikeros
NC_029265.1-4763879-4775567-Oryza_sativa_Japonica	NC_029265.1	4763879	4775567	11688	Nonautonomous:Gypsy	Tekay	yes	GAG|Tekay PROT|Tekay RT|Tekay RH|Tekay INT|Tekay CHD|Tekay
NC_029265.1-4976747-4988814-Oryza_sativa_Japonica	NC_029265.1	4976747	4988814	12067	Nonautonomous:Gypsy	Tekay	yes	GAG|Tekay PROT|Tekay RT|Tekay RH|Tekay INT|Tekay CHD|Tekay
NC_029265.1-5296067-5309303-Oryza_sativa_Japonica	NC_029265.1	5296067	5309303	13236	Nonautonomous:Gypsy	Tekay	yes	GAG|Tekay PROT|Tekay RT|Tekay RH|Tekay INT|Ale
NC_029265.1-561136-574604-Oryza_sativa_Japonica	NC_029265.1	561136	574604	13468	Nonautonomous:Gypsy	Retand	no	RT|Retand RH|Retand INT|Retand
NC_029265.1-6254711-6263182-Oryza_sativa_Japonica	NC_029265.1	6254711	6263182	8471	Nonautonomous:Copia	Ale	yes	GAG|Ale PROT|Ale INT|Ale RT|Ale RH|Ale
NC_029265.1-6435881-6447960-Oryza_sativa_Japonica	NC_029265.1	6435881	6447960	12079	Nonautonomous:Gypsy	Tekay	yes	GAG|Tekay PROT|Tekay RT|Tekay RH|Tekay INT|Tekay CHD|Tekay
NC_029265.1-6674743-6687639-Oryza_sativa_Japonica	NC_029265.1	6674743	6687639	12896	Nonautonomous:Gypsy	Retand	yes	GAG|Retand PROT|Retand RT|Retand RH|Retand INT|Retand
NC_029265.1-6801603-6812933-Oryza_sativa_Japonica	NC_029265.1	6801603	6812933	11330	Nonautonomous:Gypsy	Retand	yes	GAG|Retand PROT|Retand RT|Retand RH|Retand INT|Retand
NC_029265.1-7069661-7081750-Oryza_sativa_Japonica	NC_029265.1	7069661	7081750	12089	Nonautonomous:Gypsy	Tekay	yes	GAG|Tekay PROT|Tekay RT|Tekay RH|Tekay INT|Tekay CHD|Tekay
NC_029265.1-7141524-7153032-Oryza_sativa_Japonica	NC_029265.1	7141524	7153032	11508	Nonautonomous:Unknown	none	none	none
NC_029265.1-7228441-7239751-Oryza_sativa_Japonica	NC_029265.1	7228441	7239751	11310	Nonautonomous:Gypsy	Retand	yes	GAG|Retand PROT|Retand RT|Retand RH|Retand INT|Retand
NC_029265.1-7600462-7611767-Oryza_sativa_Japonica	NC_029265.1	7600462	7611767	11305	Nonautonomous:Gypsy	Retand	yes	GAG|Retand PROT|Retand RT|Retand RH|Retand INT|Retand
NC_029265.1-7720143-7730508-Oryza_sativa_Japonica	NC_029265.1	7720143	7730508	10365	Nonautonomous:Unknown	none	none	none
NC_029265.1-7832792-7844734-Oryza_sativa_Japonica	NC_029265.1	7832792	7844734	11942	Nonautonomous:Gypsy	Retand	yes	GAG|Retand PROT|Retand RT|Retand RH|Retand INT|Retand
NC_029265.1-8251872-8259648-Oryza_sativa_Japonica	NC_029265.1	8251872	8259648	7776	Nonautonomous:Gypsy	CRM	yes	GAG|CRM PROT|CRM RT|CRM RH|CRM INT|CRM CHDCR|CRM
NC_029265.1-8353762-8365266-Oryza_sativa_Japonica	NC_029265.1	8353762	8365266	11504	Nonautonomous:Unknown	none	none	none
NC_029265.1-8389931-8402771-Oryza_sativa_Japonica	NC_029265.1	8389931	8402771	12840	Nonautonomous:Gypsy	Retand	yes	GAG|Retand PROT|Retand RT|Retand RH|Retand INT|Retand
NC_029265.1-8643522-8654239-Oryza_sativa_Japonica	NC_029265.1	8643522	8654239	10717	Nonautonomous:Unknown	none	none	none
NC_029265.1-8664075-8678577-Oryza_sativa_Japonica	NC_029265.1	8664075	8678577	14502	Nonautonomous:Gypsy	Retand	yes	GAG|Retand PROT|Retand RT|Retand RH|Retand INT|Retand
NC_029265.1-8709499-8720263-Oryza_sativa_Japonica	NC_029265.1	8709499	8720263	10764	Nonautonomous:Unknown	none	none	none
NC_029265.1-8742073-8754159-Oryza_sativa_Japonica	NC_029265.1	8742073	8754159	12086	Nonautonomous:Gypsy	Tekay	yes	GAG|Tekay PROT|Tekay RT|Tekay RH|Tekay INT|Tekay CHD|Tekay
NC_029265.1-9317654-9328566-Oryza_sativa_Japonica	NC_029265.1	9317654	9328566	10912	Nonautonomous:Gypsy	Retand	no	GAG|Retand PROT|Retand RH|Retand INT|Retand
NC_029265.1-9369460-9373839-Oryza_sativa_Japonica	NC_029265.1	9369460	9373839	4379	Nonautonomous:Copia	Ale	no	GAG|Ale PROT|Ale INT|Ale RT|Ale
NC_029265.1-9514947-9526276-Oryza_sativa_Japonica	NC_029265.1	9514947	9526276	11329	Nonautonomous:Unknown	none	none	none
NC_029265.1-957857-970868-Oryza_sativa_Japonica	NC_029265.1	957857	970868	13011	Nonautonomous:Gypsy	Ogre	yes	GAG|Ogre PROT|Ogre RT|Ogre RH|Ogre INT|Ogre
NC_029266.1-11242228-11253690-Oryza_sativa_Japonica	NC_029266.1	11242228	11253690	11462	Nonautonomous:Gypsy	Retand	yes	GAG|Retand PROT|Retand RT|Retand RH|Retand INT|Retand
NC_029266.1-11707421-11712610-Oryza_sativa_Japonica	NC_029266.1	11707421	11712610	5189	Nonautonomous:Gypsy	Reina	yes	GAG|Reina PROT|Reina RT|Reina RH|Reina INT|Reina CHD|Reina
NC_029266.1-11721698-11734541-Oryza_sativa_Japonica	NC_029266.1	11721698	11734541	12843	Nonautonomous:Gypsy	Retand	yes	GAG|Retand PROT|Retand RT|Retand RH|Retand INT|Retand
NC_029266.1-12597707-12605459-Oryza_sativa_Japonica	NC_029266.1	12597707	12605459	7752	Nonautonomous:Gypsy	CRM	yes	GAG|CRM PROT|CRM RT|CRM RH|CRM INT|CRM CHDCR|CRM
NC_029266.1-12617669-12628420-Oryza_sativa_Japonica	NC_029266.1	12617669	12628420	10751	Nonautonomous:Gypsy	Tekay	yes	GAG|Tekay PROT|Tekay RT|Tekay RH|Tekay INT|Tekay CHD|Tekay
NC_029266.1-12748964-12757828-Oryza_sativa_Japonica	NC_029266.1	12748964	12757828	8864	Nonautonomous:Gypsy	Tekay	yes	GAG|Tekay PROT|Tekay RT|Tekay RH|Tekay INT|Tekay CHD|Tekay
NC_029266.1-12769647-12775525-Oryza_sativa_Japonica	NC_029266.1	12769647	12775525	5878	Autonomous:Copia	Ale	yes	GAG|Ale PROT|Ale INT|Ale RT|Ale RH|Ale
NC_029266.1-13313347-13328778-Oryza_sativa_Japonica	NC_029266.1	13313347	13328778	15431	Nonautonomous:Gypsy	Retand	yes	GAG|Retand PROT|Retand RT|Retand RH|Retand INT|Retand
NC_029266.1-14189675-14200990-Oryza_sativa_Japonica	NC_029266.1	14189675	14200990	11315	Nonautonomous:Gypsy	Retand	yes	GAG|Retand PROT|Retand RT|Retand RH|Retand INT|Retand
NC_029266.1-14588955-14600228-Oryza_sativa_Japonica	NC_029266.1	14588955	14600228	11273	Nonautonomous:Gypsy	Tekay	yes	GAG|Tekay PROT|Tekay RT|Tekay RH|Tekay INT|Tekay CHD|Tekay
NC_029266.1-14638600-14652385-Oryza_sativa_Japonica	NC_029266.1	14638600	14652385	13785	Nonautonomous:Gypsy	Ogre	yes	GAG|Ogre PROT|Ogre RT|Ogre RH|Ogre INT|Ogre
NC_029266.1-14724930-14735979-Oryza_sativa_Japonica	NC_029266.1	14724930	14735979	11049	Nonautonomous:Gypsy	Retand	no	GAG|Retand PROT|Retand RH|Retand INT|Retand
NC_029266.1-1514552-1522249-Oryza_sativa_Japonica	NC_029266.1	1514552	1522249	7697	Nonautonomous:Copia	Tork	yes	GAG|Tork PROT|Tork INT|Tork RT|Tork RH|Tork
NC_029266.1-16230578-16242212-Oryza_sativa_Japonica	NC_029266.1	16230578	16242212	11634	Nonautonomous:Gypsy	Retand	yes	GAG|Retand PROT|Retand RT|Retand RH|Retand INT|Retand
NC_029266.1-16610586-16621513-Oryza_sativa_Japonica	NC_029266.1	16610586	16621513	10927	Nonautonomous:Gypsy	Retand	yes	GAG|Retand PROT|Retand RT|Retand RH|Retand INT|Retand
NC_029266.1-17089218-17096891-Oryza_sativa_Japonica	NC_029266.1	17089218	17096891	7673	Nonautonomous:Gypsy	Retand	no	GAG|Retand INT|Retand
NC_029266.1-17356494-17368100-Oryza_sativa_Japonica	NC_029266.1	17356494	17368100	11606	Nonautonomous:Gypsy	Retand	yes	GAG|Retand PROT|Retand RT|Retand RH|Retand INT|Retand
NC_029266.1-17405325-17410828-Oryza_sativa_Japonica	NC_029266.1	17405325	17410828	5503	Nonautonomous:Copia	Ale	yes	GAG|Ale PROT|Ale INT|Ale RT|Ale RH|Ale
NC_029266.1-17526895-17533176-Oryza_sativa_Japonica	NC_029266.1	17526895	17533176	6281	Nonautonomous:Copia	Ikeros	no	GAG|Ikeros
NC_029266.1-17751051-17763983-Oryza_sativa_Japonica	NC_029266.1	17751051	17763983	12932	Nonautonomous:Gypsy	Retand	yes	GAG|Retand PROT|Retand RT|Retand RH|Retand INT|Retand
NC_029266.1-17879233-17884469-Oryza_sativa_Japonica	NC_029266.1	17879233	17884469	5236	Nonautonomous:Copia	Ale	yes	GAG|Ale PROT|Ale INT|Ale RT|Ale RH|Ale
NC_029266.1-18017103-18028325-Oryza_sativa_Japonica	NC_029266.1	18017103	18028325	11222	Nonautonomous:Gypsy	Retand	no	GAG|Retand RT|Retand RH|Retand INT|Retand
NC_029266.1-18185849-18196991-Oryza_sativa_Japonica	NC_029266.1	18185849	18196991	11142	Nonautonomous:Unknown	none	none	none
NC_029266.1-18212882-18224611-Oryza_sativa_Japonica	NC_029266.1	18212882	18224611	11729	Nonautonomous:Gypsy	Tekay	yes	GAG|Tekay PROT|Tekay RT|Tekay RH|Tekay INT|Tekay CHD|Tekay
NC_029266.1-18888568-18894048-Oryza_sativa_Japonica	NC_029266.1	18888568	18894048	5480	Nonautonomous:Gypsy	Reina	yes	GAG|Reina PROT|Reina RT|Reina RH|Reina INT|Reina CHD|Reina
NC_029266.1-19543619-19555350-Oryza_sativa_Japonica	NC_029266.1	19543619	19555350	11731	Nonautonomous:Gypsy	Retand	no	GAG|Retand PROT|Retand RT|Retand RH|Retand INT|Retand
NC_029266.1-2032687-2044001-Oryza_sativa_Japonica	NC_029266.1	2032687	2044001	11314	Nonautonomous:Unknown	none	none	none
NC_029266.1-20622199-20633794-Oryza_sativa_Japonica	NC_029266.1	20622199	20633794	11595	Nonautonomous:Unknown	none	none	none
NC_029266.1-20637372-20643021-Oryza_sativa_Japonica	NC_029266.1	20637372	20643021	5649	Nonautonomous:Gypsy	Reina	yes	GAG|Reina PROT|Reina RT|Reina RH|Reina INT|Reina CHD|Reina
NC_029266.1-20661081-20667053-Oryza_sativa_Japonica	NC_029266.1	20661081	20667053	5972	Nonautonomous:Copia	Ikeros	no	GAG|Ikeros PROT|Ikeros RH|Ikeros
NC_029266.1-20868913-20874040-Oryza_sativa_Japonica	NC_029266.1	20868913	20874040	5127	Nonautonomous:Copia	Ivana	yes	GAG|Ivana PROT|Ivana INT|Ivana RT|Ivana RH|Ivana
NC_029266.1-20887966-20893311-Oryza_sativa_Japonica	NC_029266.1	20887966	20893311	5345	Nonautonomous:Copia	Ale	no	GAG|Ale PROT|Ale INT|Ale RT|Ale
NC_029266.1-21739599-21745054-Oryza_sativa_Japonica	NC_029266.1	21739599	21745054	5455	Nonautonomous:Gypsy	Reina	yes	GAG|Reina PROT|Reina RT|Reina RH|Reina INT|Reina CHD|Reina
NC_029266.1-22583140-22595749-Oryza_sativa_Japonica	NC_029266.1	22583140	22595749	12609	Nonautonomous:Gypsy	Tekay	yes	GAG|Tekay PROT|Tekay RT|Tekay RH|Tekay INT|Tekay CHD|Tekay
NC_029266.1-23520977-23532556-Oryza_sativa_Japonica	NC_029266.1	23520977	23532556	11579	Nonautonomous:Copia	SIRE	yes	GAG|SIRE PROT|SIRE INT|SIRE RT|SIRE RH|SIRE
NC_029266.1-23877000-23890018-Oryza_sativa_Japonica	NC_029266.1	23877000	23890018	13018	Nonautonomous:Gypsy	Retand	yes	GAG|Retand PROT|Retand RT|Retand RH|Retand INT|Retand
NC_029266.1-24019995-24031952-Oryza_sativa_Japonica	NC_029266.1	24019995	24031952	11957	Nonautonomous:Gypsy	Retand	yes	GAG|Retand PROT|Retand RT|Retand RH|Retand INT|Retand
NC_029266.1-24441063-24445960-Oryza_sativa_Japonica	NC_029266.1	24441063	24445960	4897	Nonautonomous:Copia	Ale	yes	GAG|Ale PROT|Ale INT|Ale RT|Ale RH|Ale
NC_029266.1-24738411-24749843-Oryza_sativa_Japonica	NC_029266.1	24738411	24749843	11432	Nonautonomous:Gypsy	Retand	yes	GAG|Retand PROT|Retand RT|Retand RH|Retand INT|Retand
NC_029266.1-25066218-25077521-Oryza_sativa_Japonica	NC_029266.1	25066218	25077521	11303	Nonautonomous:Gypsy	Retand	yes	GAG|Retand PROT|Retand RT|Retand RH|Retand INT|Retand
NC_029266.1-25370233-25383152-Oryza_sativa_Japonica	NC_029266.1	25370233	25383152	12919	Nonautonomous:Gypsy	Retand	yes	GAG|Retand PROT|Retand RT|Retand RH|Retand INT|Retand
NC_029266.1-25479644-25490956-Oryza_sativa_Japonica	NC_029266.1	25479644	25490956	11312	Nonautonomous:Gypsy	Retand	yes	GAG|Retand PROT|Retand RT|Retand RH|Retand INT|Retand
NC_029266.1-26077304-26081700-Oryza_sativa_Japonica	NC_029266.1	26077304	26081700	4396	Nonautonomous:Copia	Ale	yes	GAG|Ale PROT|Ale INT|Ale RT|Ale RH|Ale
NC_029266.1-26180931-26192241-Oryza_sativa_Japonica	NC_029266.1	26180931	26192241	11310	Nonautonomous:Gypsy	Retand	yes	GAG|Retand PROT|Retand RT|Retand RH|Retand INT|Retand
NC_029266.1-26360295-26373145-Oryza_sativa_Japonica	NC_029266.1	26360295	26373145	12850	Autonomous:Gypsy	Retand	yes	GAG|Retand PROT|Retand RT|Retand RH|Retand INT|Retand
NC_029266.1-26621752-26633061-Oryza_sativa_Japonica	NC_029266.1	26621752	26633061	11309	Nonautonomous:Gypsy	Retand	yes	GAG|Retand PROT|Retand RT|Retand RH|Retand INT|Retand
NC_029266.1-26646318-26659859-Oryza_sativa_Japonica	NC_029266.1	26646318	26659859	13541	Nonautonomous:Gypsy	Tekay	yes	GAG|Tekay PROT|Tekay RT|Tekay RH|Tekay INT|Tekay CHD|Tekay
NC_029266.1-27245109-27251057-Oryza_sativa_Japonica	NC_029266.1	27245109	27251057	5948	Nonautonomous:Gypsy	Reina	yes	GAG|Reina PROT|Reina RT|Reina RH|Reina INT|Reina CHD|Reina
NC_029266.1-27369079-27380384-Oryza_sativa_Japonica	NC_029266.1	27369079	27380384	11305	Nonautonomous:Gypsy	Retand	yes	GAG|Retand PROT|Retand RT|Retand RH|Retand INT|Retand
NC_029266.1-28382628-28395528-Oryza_sativa_Japonica	NC_029266.1	28382628	28395528	12900	Autonomous:Gypsy	Retand	yes	GAG|Retand PROT|Retand RT|Retand RH|Retand INT|Retand
NC_029266.1-28520708-28533691-Oryza_sativa_Japonica	NC_029266.1	28520708	28533691	12983	Nonautonomous:Gypsy	Retand	yes	GAG|Retand PROT|Retand RT|Retand RH|Retand INT|Retand
NC_029266.1-28707292-28713613-Oryza_sativa_Japonica	NC_029266.1	28707292	28713613	6321	Nonautonomous:Copia	Ikeros	yes	GAG|Ikeros PROT|Ikeros INT|Ikeros RT|Ikeros RH|Ikeros
NC_029266.1-3452181-3457377-Oryza_sativa_Japonica	NC_029266.1	3452181	3457377	5196	Nonautonomous:Copia	Ivana	yes	GAG|Ivana PROT|Ivana INT|Ivana RT|Ivana RH|Ivana
NC_029266.1-3977195-3986492-Oryza_sativa_Japonica	NC_029266.1	3977195	3986492	9297	Nonautonomous:Copia	SIRE	yes	GAG|SIRE PROT|SIRE INT|SIRE RT|SIRE RH|SIRE
NC_029266.1-4145331-4150403-Oryza_sativa_Japonica	NC_029266.1	4145331	4150403	5072	Nonautonomous:Copia	Ale	yes	GAG|Ale PROT|Ale INT|Ale RT|Ale RH|Ale
NC_029266.1-46935-52144-Oryza_sativa_Japonica	NC_029266.1	46935	52144	5209	Nonautonomous:Copia	Ivana	yes	GAG|Ivana PROT|Ivana INT|Ivana RT|Ivana RH|Ivana
NC_029266.1-492222-503875-Oryza_sativa_Japonica	NC_029266.1	492222	503875	11653	Nonautonomous:Gypsy	Retand	yes	GAG|Retand PROT|Retand RT|Retand RH|Retand INT|Retand
NC_029266.1-4948382-4961272-Oryza_sativa_Japonica	NC_029266.1	4948382	4961272	12890	Nonautonomous:Gypsy	Retand	yes	GAG|Retand PROT|Retand RT|Retand RH|Retand INT|Retand
NC_029266.1-4976006-4989024-Oryza_sativa_Japonica	NC_029266.1	4976006	4989024	13018	Nonautonomous:Gypsy	Retand	no	GAG|Retand PROT|Retand RT|Retand INT|Retand
NC_029266.1-5042257-5055122-Oryza_sativa_Japonica	NC_029266.1	5042257	5055122	12865	Nonautonomous:Gypsy	Retand	yes	GAG|Retand PROT|Retand RT|Retand RH|Retand INT|Retand
NC_029266.1-5736444-5744010-Oryza_sativa_Japonica	NC_029266.1	5736444	5744010	7566	Nonautonomous:Copia	Bianca	yes	GAG|Bianca PROT|Bianca INT|Bianca RT|Bianca RH|Bianca
NC_029266.1-6006993-6019523-Oryza_sativa_Japonica	NC_029266.1	6006993	6019523	12530	Nonautonomous:Gypsy	Tekay	yes	GAG|Tekay PROT|Tekay RT|Tekay RH|Tekay INT|Tekay CHD|Tekay
NC_029266.1-6149358-6155357-Oryza_sativa_Japonica	NC_029266.1	6149358	6155357	5999	Nonautonomous:Copia	Ikeros	no	GAG|Ikeros PROT|Ikeros RT|Ikeros RH|Ikeros
NC_029266.1-6497509-6506202-Oryza_sativa_Japonica	NC_029266.1	6497509	6506202	8693	Nonautonomous:Gypsy	Reina	yes	GAG|Reina PROT|Reina RT|Reina RH|Reina INT|Reina CHD|Reina
NC_029266.1-6732623-6745839-Oryza_sativa_Japonica	NC_029266.1	6732623	6745839	13216	Nonautonomous:Gypsy	Tekay	yes	GAG|Tekay PROT|Tekay RT|Tekay RH|Tekay INT|Tekay CHD|Tekay
NC_029266.1-6796387-6820447-Oryza_sativa_Japonica	NC_029266.1	6796387	6820447	24060	Nonautonomous:Gypsy	Tekay	no	RH|Tekay CHD|Tekay INT|Tekay RT|Tekay PROT|Tekay GAG|Tekay
NC_029266.1-6804170-6816261-Oryza_sativa_Japonica	NC_029266.1	6804170	6816261	12091	Nonautonomous:Gypsy	Tekay	yes	GAG|Tekay PROT|Tekay RT|Tekay RH|Tekay INT|Tekay CHD|Tekay
NC_029266.1-7160313-7173190-Oryza_sativa_Japonica	NC_029266.1	7160313	7173190	12877	Nonautonomous:Gypsy	Retand	yes	GAG|Retand PROT|Retand RT|Retand RH|Retand INT|Retand
NC_029266.1-7296466-7308552-Oryza_sativa_Japonica	NC_029266.1	7296466	7308552	12086	Nonautonomous:Gypsy	Tekay	yes	GAG|Tekay PROT|Tekay RT|Tekay RH|Tekay INT|Tekay CHD|Tekay
NC_029266.1-7445411-7458291-Oryza_sativa_Japonica	NC_029266.1	7445411	7458291	12880	Nonautonomous:Gypsy	Retand	yes	GAG|Retand PROT|Retand RT|Retand RH|Retand INT|Retand
NC_029266.1-7577522-7583066-Oryza_sativa_Japonica	NC_029266.1	7577522	7583066	5544	Nonautonomous:Gypsy	Retand	no	GAG|Retand INT|Retand RH|Retand
NC_029266.1-8111070-8121610-Oryza_sativa_Japonica	NC_029266.1	8111070	8121610	10540	Nonautonomous:Gypsy	Retand	yes	GAG|Retand PROT|Retand RT|Retand RH|Retand INT|Retand
NC_029266.1-8423649-8436517-Oryza_sativa_Japonica	NC_029266.1	8423649	8436517	12868	Nonautonomous:Gypsy	Retand	yes	GAG|Retand PROT|Retand RT|Retand RH|Retand INT|Retand
NC_029266.1-8491793-8503087-Oryza_sativa_Japonica	NC_029266.1	8491793	8503087	11294	Nonautonomous:Gypsy	Retand	yes	GAG|Retand PROT|Retand RT|Retand RH|Retand INT|Retand
NC_029267.1-10023736-10037554-Oryza_sativa_Japonica	NC_029267.1	10023736	10037554	13818	Nonautonomous:Gypsy	Tekay	yes	GAG|Tekay PROT|Tekay RT|Tekay RH|Tekay INT|Tekay CHD|Tekay
NC_029267.1-10092947-10103201-Oryza_sativa_Japonica	NC_029267.1	10092947	10103201	10254	Nonautonomous:Unknown	none	none	none
NC_029267.1-10156802-10168091-Oryza_sativa_Japonica	NC_029267.1	10156802	10168091	11289	Nonautonomous:Gypsy	Retand	yes	GAG|Retand PROT|Retand RT|Retand RH|Retand INT|Retand
NC_029267.1-10324965-10337276-Oryza_sativa_Japonica	NC_029267.1	10324965	10337276	12311	Nonautonomous:Gypsy	Tekay	yes	GAG|Tekay PROT|Tekay RT|Tekay RH|Tekay INT|Tekay CHD|Tekay
NC_029267.1-10390077-10395556-Oryza_sativa_Japonica	NC_029267.1	10390077	10395556	5479	Autonomous:Gypsy	Reina	yes	GAG|Reina PROT|Reina RT|Reina RH|Reina INT|Reina CHD|Reina
NC_029267.1-10545784-10557645-Oryza_sativa_Japonica	NC_029267.1	10545784	10557645	11861	Nonautonomous:Unknown	none	none	none
NC_029267.1-11551855-11561155-Oryza_sativa_Japonica	NC_029267.1	11551855	11561155	9300	Nonautonomous:Gypsy	CRM	yes	GAG|CRM PROT|CRM RT|CRM RH|CRM INT|CRM CHDCR|CRM
NC_029267.1-11778775-11788990-Oryza_sativa_Japonica	NC_029267.1	11778775	11788990	10215	Nonautonomous:Gypsy	Retand	yes	GAG|Retand PROT|Retand RT|Retand RH|Retand INT|Retand
NC_029267.1-12154396-12165813-Oryza_sativa_Japonica	NC_029267.1	12154396	12165813	11417	Nonautonomous:Gypsy	Tekay	yes	GAG|Tekay PROT|Tekay RT|Tekay RH|Tekay INT|Tekay CHD|Tekay
NC_029267.1-12331518-12336262-Oryza_sativa_Japonica	NC_029267.1	12331518	12336262	4744	Nonautonomous:Gypsy	Retand	no	GAG|Retand INT|Retand
NC_029267.1-12681666-12688099-Oryza_sativa_Japonica	NC_029267.1	12681666	12688099	6433	Nonautonomous:Copia	Ikeros	yes	GAG|Ikeros PROT|Ikeros INT|Ikeros RT|Ikeros RH|Ikeros
NC_029267.1-13128655-13139948-Oryza_sativa_Japonica	NC_029267.1	13128655	13139948	11293	Nonautonomous:Gypsy	Retand	yes	GAG|Retand PROT|Retand RT|Retand RH|Retand INT|Retand
NC_029267.1-13250936-13262934-Oryza_sativa_Japonica	NC_029267.1	13250936	13262934	11998	Nonautonomous:Gypsy	Tekay	yes	GAG|Tekay PROT|Tekay RT|Tekay RH|Tekay INT|Tekay CHD|Tekay
NC_029267.1-13309481-13328290-Oryza_sativa_Japonica	NC_029267.1	13309481	13328290	18809	Nonautonomous:Gypsy	Retand	yes	GAG|Retand PROT|Retand RT|Retand RH|Retand INT|Retand
NC_029267.1-13588410-13599703-Oryza_sativa_Japonica	NC_029267.1	13588410	13599703	11293	Nonautonomous:Gypsy	Retand	yes	GAG|Retand PROT|Retand RT|Retand RH|Retand INT|Retand
NC_029267.1-13666173-13671655-Oryza_sativa_Japonica	NC_029267.1	13666173	13671655	5482	Nonautonomous:Gypsy	Reina	yes	GAG|Reina PROT|Reina RT|Reina RH|Reina INT|Reina CHD|Reina
NC_029267.1-13802039-13807518-Oryza_sativa_Japonica	NC_029267.1	13802039	13807518	5479	Nonautonomous:Copia	Ale	yes	GAG|Ale PROT|Ale INT|Ale RT|Ale RH|Ale
NC_029267.1-14167499-14172156-Oryza_sativa_Japonica	NC_029267.1	14167499	14172156	4657	Nonautonomous:Copia	Ale	yes	GAG|Ale PROT|Ale INT|Ale RT|Ale RH|Ale
NC_029267.1-14211593-14216626-Oryza_sativa_Japonica	NC_029267.1	14211593	14216626	5033	Nonautonomous:Gypsy	Reina	yes	GAG|Reina PROT|Reina RT|Reina RH|Reina INT|Reina CHD|Reina
NC_029267.1-14339362-14344678-Oryza_sativa_Japonica	NC_029267.1	14339362	14344678	5316	Nonautonomous:Gypsy	Retand	no	GAG|Retand RH|Retand
NC_029267.1-14471210-14477658-Oryza_sativa_Japonica	NC_029267.1	14471210	14477658	6448	Nonautonomous:Copia	Ikeros	yes	GAG|Ikeros PROT|Ikeros INT|Ikeros RT|Ikeros RH|Ikeros
NC_029267.1-15252799-15257873-Oryza_sativa_Japonica	NC_029267.1	15252799	15257873	5074	Nonautonomous:Copia	Ale	yes	GAG|Ale PROT|Ale INT|Ale RT|Ale RH|Ale
NC_029267.1-15291098-15303942-Oryza_sativa_Japonica	NC_029267.1	15291098	15303942	12844	Nonautonomous:Gypsy	Retand	yes	GAG|Retand PROT|Retand RT|Retand RH|Retand INT|Retand
NC_029267.1-15508549-15516631-Oryza_sativa_Japonica	NC_029267.1	15508549	15516631	8082	Nonautonomous:Copia	Bianca	yes	GAG|Bianca PROT|Bianca INT|Bianca RT|Bianca RH|Bianca
NC_029267.1-15544967-15557247-Oryza_sativa_Japonica	NC_029267.1	15544967	15557247	12280	Nonautonomous:Copia	SIRE	yes	GAG|SIRE PROT|SIRE INT|SIRE RT|SIRE RH|SIRE
NC_029267.1-15604295-15616569-Oryza_sativa_Japonica	NC_029267.1	15604295	15616569	12274	Nonautonomous:Copia	SIRE	yes	GAG|SIRE PROT|SIRE INT|SIRE RT|SIRE RH|SIRE
NC_029267.1-1573263-1578111-Oryza_sativa_Japonica	NC_029267.1	1573263	1578111	4848	Autonomous:Copia	Ale	yes	GAG|Ale PROT|Ale INT|Ale RT|Ale RH|Ale
NC_029267.1-15929335-15941425-Oryza_sativa_Japonica	NC_029267.1	15929335	15941425	12090	Nonautonomous:Gypsy	Tekay	yes	GAG|Tekay PROT|Tekay RT|Tekay RH|Tekay INT|Tekay CHD|Tekay
NC_029267.1-16146522-16151655-Oryza_sativa_Japonica	NC_029267.1	16146522	16151655	5133	Nonautonomous:Copia	SIRE	no	GAG|SIRE INT|SIRE
NC_029267.1-16331960-16343320-Oryza_sativa_Japonica	NC_029267.1	16331960	16343320	11360	Nonautonomous:Gypsy	Retand	yes	GAG|Retand PROT|Retand RT|Retand RH|Retand INT|Retand
NC_029267.1-16642615-16653921-Oryza_sativa_Japonica	NC_029267.1	16642615	16653921	11306	Nonautonomous:Gypsy	Retand	yes	GAG|Retand PROT|Retand RT|Retand RH|Retand INT|Retand
NC_029267.1-16719199-16733716-Oryza_sativa_Japonica	NC_029267.1	16719199	16733716	14517	Nonautonomous:Gypsy	Retand	yes	GAG|Retand PROT|Retand RT|Retand RH|Retand INT|Retand
NC_029267.1-16802736-16812635-Oryza_sativa_Japonica	NC_029267.1	16802736	16812635	9899	Nonautonomous:Gypsy	Tekay	no	GAG|Tekay
NC_029267.1-17090056-17102159-Oryza_sativa_Japonica	NC_029267.1	17090056	17102159	12103	Nonautonomous:Gypsy	Tekay	yes	GAG|Tekay PROT|Tekay RT|Tekay RH|Tekay INT|Tekay CHD|Tekay
NC_029267.1-17183942-17194336-Oryza_sativa_Japonica	NC_029267.1	17183942	17194336	10394	Nonautonomous:Unknown	none	none	none
NC_029267.1-17241563-17253325-Oryza_sativa_Japonica	NC_029267.1	17241563	17253325	11762	Nonautonomous:Gypsy	Tekay	yes	GAG|Tekay PROT|Tekay RT|Tekay RH|Tekay INT|Tekay CHD|Tekay
NC_029267.1-17283310-17294626-Oryza_sativa_Japonica	NC_029267.1	17283310	17294626	11316	Nonautonomous:Gypsy	Retand	yes	GAG|Retand PROT|Retand RT|Retand RH|Retand INT|Retand
NC_029267.1-17450412-17461649-Oryza_sativa_Japonica	NC_029267.1	17450412	17461649	11237	Nonautonomous:Gypsy	Tekay	yes	GAG|Tekay PROT|Tekay RT|Tekay RH|Tekay INT|Tekay CHD|Tekay
NC_029267.1-18141591-18151362-Oryza_sativa_Japonica	NC_029267.1	18141591	18151362	9771	Nonautonomous:Gypsy	Tekay	no	GAG|Tekay
NC_029267.1-18159401-18170244-Oryza_sativa_Japonica	NC_029267.1	18159401	18170244	10843	Nonautonomous:Gypsy	Retand	no	GAG|Retand RT|Retand RH|Retand INT|Retand
NC_029267.1-18375471-18380539-Oryza_sativa_Japonica	NC_029267.1	18375471	18380539	5068	Nonautonomous:Copia	Ale	yes	GAG|Ale PROT|Ale INT|Ale RT|Ale RH|Ale
NC_029267.1-18547649-18558744-Oryza_sativa_Japonica	NC_029267.1	18547649	18558744	11095	Nonautonomous:TR-GAG	Tekay	no	GAG|Tekay
NC_029267.1-18670143-18684206-Oryza_sativa_Japonica	NC_029267.1	18670143	18684206	14063	Nonautonomous:Gypsy	Tekay	yes	GAG|Tekay PROT|Tekay RT|Tekay RH|Tekay INT|Tekay CHD|Tekay
NC_029267.1-18771925-18783254-Oryza_sativa_Japonica	NC_029267.1	18771925	18783254	11329	Nonautonomous:Gypsy	Retand	yes	GAG|Retand PROT|Retand RT|Retand RH|Retand INT|Retand
NC_029267.1-20158956-20170261-Oryza_sativa_Japonica	NC_029267.1	20158956	20170261	11305	Nonautonomous:Gypsy	Retand	yes	GAG|Retand PROT|Retand RT|Retand RH|Retand INT|Retand
NC_029267.1-20316312-20326897-Oryza_sativa_Japonica	NC_029267.1	20316312	20326897	10585	Nonautonomous:Unknown	none	none	none
NC_029267.1-20382153-20393931-Oryza_sativa_Japonica	NC_029267.1	20382153	20393931	11778	Nonautonomous:Unknown	none	none	none
NC_029267.1-20985567-20991019-Oryza_sativa_Japonica	NC_029267.1	20985567	20991019	5452	Nonautonomous:Gypsy	Retand	no	GAG|Retand INT|Retand RH|Retand
NC_029267.1-21273148-21278686-Oryza_sativa_Japonica	NC_029267.1	21273148	21278686	5538	Nonautonomous:Copia	Ivana	yes	GAG|Ivana PROT|Ivana INT|Ivana RT|Ivana RH|Ivana
NC_029267.1-21302664-21307875-Oryza_sativa_Japonica	NC_029267.1	21302664	21307875	5211	Nonautonomous:Copia	Ivana	yes	GAG|Ivana PROT|Ivana INT|Ivana RT|Ivana RH|Ivana
NC_029267.1-21824817-21829901-Oryza_sativa_Japonica	NC_029267.1	21824817	21829901	5084	Nonautonomous:Copia	Tork	yes	GAG|Tork PROT|Tork INT|Tork RT|Tork RH|Tork
NC_029267.1-22142687-22157994-Oryza_sativa_Japonica	NC_029267.1	22142687	22157994	15307	Nonautonomous:Gypsy	Retand	yes	GAG|Retand PROT|Retand RT|Retand RH|Retand INT|Retand
NC_029267.1-22377874-22390601-Oryza_sativa_Japonica	NC_029267.1	22377874	22390601	12727	Nonautonomous:Gypsy	Retand	yes	GAG|Retand PROT|Retand RT|Retand RH|Retand INT|Retand
NC_029267.1-23365354-23376421-Oryza_sativa_Japonica	NC_029267.1	23365354	23376421	11067	Nonautonomous:Gypsy	Tekay	yes	GAG|Tekay PROT|Tekay RT|Tekay RH|Tekay INT|Tekay CHD|Tekay
NC_029267.1-2354103-2359625-Oryza_sativa_Japonica	NC_029267.1	2354103	2359625	5522	Nonautonomous:Copia	Ale	yes	GAG|Ale PROT|Ale INT|Ale RT|Ale RH|Ale
NC_029267.1-24162741-24172526-Oryza_sativa_Japonica	NC_029267.1	24162741	24172526	9785	Nonautonomous:Gypsy	Retand	no	GAG|Retand PROT|Retand RT|Retand INT|Retand
NC_029267.1-24438549-24449847-Oryza_sativa_Japonica	NC_029267.1	24438549	24449847	11298	Nonautonomous:Gypsy	Retand	yes	GAG|Retand PROT|Retand RT|Retand RH|Retand INT|Retand
NC_029267.1-24767165-24772928-Oryza_sativa_Japonica	NC_029267.1	24767165	24772928	5763	Nonautonomous:Copia	Ivana	yes	GAG|Ivana PROT|Ivana INT|Ivana RT|Ivana RH|Ivana
NC_029267.1-2527367-2532300-Oryza_sativa_Japonica	NC_029267.1	2527367	2532300	4933	Nonautonomous:Copia	Ivana	yes	GAG|Ivana PROT|Ivana INT|Ivana RT|Ivana RH|Ivana
NC_029267.1-27219924-27225582-Oryza_sativa_Japonica	NC_029267.1	27219924	27225582	5658	Nonautonomous:Gypsy	Reina	yes	GAG|Reina PROT|Reina RT|Reina RH|Reina INT|Reina CHD|Reina
NC_029267.1-27417637-27422567-Oryza_sativa_Japonica	NC_029267.1	27417637	27422567	4930	Nonautonomous:Copia	Ivana	yes	GAG|Ivana PROT|Ivana INT|Ivana RT|Ivana RH|Ivana
NC_029267.1-282980-289646-Oryza_sativa_Japonica	NC_029267.1	282980	289646	6666	Nonautonomous:Copia	TAR	yes	GAG|TAR PROT|TAR INT|TAR RT|TAR RH|TAR
NC_029267.1-3043392-3054773-Oryza_sativa_Japonica	NC_029267.1	3043392	3054773	11381	Nonautonomous:Gypsy	Retand	yes	GAG|Retand PROT|Retand RT|Retand RH|Retand INT|Retand
NC_029267.1-3256344-3271230-Oryza_sativa_Japonica	NC_029267.1	3256344	3271230	14886	Nonautonomous:Gypsy	Retand	yes	GAG|Retand PROT|Retand RT|Retand RH|Retand INT|Retand
NC_029267.1-4011798-4017026-Oryza_sativa_Japonica	NC_029267.1	4011798	4017026	5228	Nonautonomous:Copia	Ivana	yes	GAG|Ivana PROT|Ivana INT|Ivana RT|Ivana RH|Ivana
NC_029267.1-45346-50556-Oryza_sativa_Japonica	NC_029267.1	45346	50556	5210	Nonautonomous:Copia	Ivana	yes	GAG|Ivana PROT|Ivana INT|Ivana RT|Ivana RH|Ivana
NC_029267.1-4968252-4981972-Oryza_sativa_Japonica	NC_029267.1	4968252	4981972	13720	Nonautonomous:Gypsy	Ogre	yes	GAG|Ogre PROT|Ogre RT|Ogre RH|Ogre INT|Ogre
NC_029267.1-5226957-5238265-Oryza_sativa_Japonica	NC_029267.1	5226957	5238265	11308	Nonautonomous:Gypsy	Retand	yes	GAG|Retand PROT|Retand RT|Retand RH|Retand INT|Retand
NC_029267.1-5343802-5357669-Oryza_sativa_Japonica	NC_029267.1	5343802	5357669	13867	Nonautonomous:Unknown	none	none	none
NC_029267.1-5521067-5534810-Oryza_sativa_Japonica	NC_029267.1	5521067	5534810	13743	Nonautonomous:Gypsy	Ogre	yes	GAG|Ogre PROT|Ogre RT|Ogre RH|Ogre INT|Ogre
NC_029267.1-8092401-8105291-Oryza_sativa_Japonica	NC_029267.1	8092401	8105291	12890	Nonautonomous:Gypsy	Retand	yes	GAG|Retand PROT|Retand RT|Retand RH|Retand INT|Retand
NC_029267.1-8114604-8125932-Oryza_sativa_Japonica	NC_029267.1	8114604	8125932	11328	Nonautonomous:Gypsy	Retand	yes	GAG|Retand PROT|Retand RT|Retand RH|Retand INT|Retand
NC_029267.1-8634056-8640512-Oryza_sativa_Japonica	NC_029267.1	8634056	8640512	6456	Nonautonomous:Copia	SIRE	no	GAG|SIRE
NC_029267.1-8964182-8976176-Oryza_sativa_Japonica	NC_029267.1	8964182	8976176	11994	Nonautonomous:Gypsy	Retand	yes	GAG|Retand PROT|Retand RT|Retand RH|Retand INT|Retand
NC_029267.1-9005218-9013704-Oryza_sativa_Japonica	NC_029267.1	9005218	9013704	8486	Nonautonomous:Gypsy	Reina	yes	GAG|Reina PROT|Reina RT|Reina RH|Reina INT|Reina CHD|Reina
NC_029267.1-9048236-9059631-Oryza_sativa_Japonica	NC_029267.1	9048236	9059631	11395	Nonautonomous:Gypsy	Retand	yes	GAG|Retand PROT|Retand RT|Retand RH|Retand INT|Retand
NC_029267.1-9215043-9228879-Oryza_sativa_Japonica	NC_029267.1	9215043	9228879	13836	Nonautonomous:Gypsy	Ogre	yes	GAG|Ogre PROT|Ogre RT|Ogre RH|Ogre INT|Ogre
NC_029267.1-9407376-9412110-Oryza_sativa_Japonica	NC_029267.1	9407376	9412110	4734	Nonautonomous:Copia	Ale	yes	GAG|Ale PROT|Ale INT|Ale RT|Ale RH|Ale
NC_029267.1-9845576-9856890-Oryza_sativa_Japonica	NC_029267.1	9845576	9856890	11314	Nonautonomous:Gypsy	Retand	yes	GAG|Retand PROT|Retand RT|Retand RH|Retand INT|Retand
NC_029256.1-4469006-4483877-Oryza_sativa_Japonica	NC_029256.1	4469006	4483877	14871	Nonautonomous:Gypsy	Retand	yes	GAG|Retand PROT|Retand RT|Retand RH|Retand INT|Retand
NC_029256.1-4776234-4781945-Oryza_sativa_Japonica	NC_029256.1	4776234	4781945	5711	Nonautonomous:Copia	Ivana	yes	GAG|Ivana PROT|Ivana INT|Ivana RT|Ivana RH|Ivana
NC_029256.1-8822537-8827749-Oryza_sativa_Japonica	NC_029256.1	8822537	8827749	5212	Nonautonomous:Copia	Ivana	yes	GAG|Ivana PROT|Ivana INT|Ivana RT|Ivana RH|Ivana
NC_029256.1-9619041-9624788-Oryza_sativa_Japonica	NC_029256.1	9619041	9624788	5747	Nonautonomous:Copia	Ivana	yes	GAG|Ivana PROT|Ivana INT|Ivana RT|Ivana RH|Ivana
NC_029256.1-13624750-13635018-Oryza_sativa_Japonica	NC_029256.1	13624750	13635018	10268	Nonautonomous:Unknown	none	none	none
NC_029256.1-16733778-16742204-Oryza_sativa_Japonica	NC_029256.1	16733778	16742204	8426	Nonautonomous:Copia	SIRE	no	GAG|SIRE
NC_029256.1-17311138-17318901-Oryza_sativa_Japonica	NC_029256.1	17311138	17318901	7763	Nonautonomous:Gypsy	Retand	no	GAG|Retand PROT|Retand RT|Retand RH|Retand
NC_029256.1-17699910-17705447-Oryza_sativa_Japonica	NC_029256.1	17699910	17705447	5537	Nonautonomous:Copia	Ale	yes	GAG|Ale PROT|Ale INT|Ale RT|Ale RH|Ale
NC_029256.1-17887069-17892286-Oryza_sativa_Japonica	NC_029256.1	17887069	17892286	5217	Nonautonomous:Copia	Ivana	yes	GAG|Ivana PROT|Ivana INT|Ivana RT|Ivana RH|Ivana
NC_029256.1-31122307-31127332-Oryza_sativa_Japonica	NC_029256.1	31122307	31127332	5025	Nonautonomous:Copia	Ale	yes	GAG|Ale PROT|Ale INT|Ale RT|Ale RH|Ale
NC_029257.1-1767928-1772823-Oryza_sativa_Japonica	NC_029257.1	1767928	1772823	4895	Nonautonomous:Copia	Ale	yes	GAG|Ale PROT|Ale INT|Ale RT|Ale RH|Ale
NC_029257.1-8328957-8340984-Oryza_sativa_Japonica	NC_029257.1	8328957	8340984	12027	Nonautonomous:Copia	SIRE	yes	GAG|SIRE PROT|SIRE INT|SIRE RT|SIRE RH|SIRE
NC_029257.1-12944179-12950808-Oryza_sativa_Japonica	NC_029257.1	12944179	12950808	6629	Nonautonomous:Gypsy	Retand	no	INT|Retand
NC_029257.1-15160591-15166757-Oryza_sativa_Japonica	NC_029257.1	15160591	15166757	6166	Autonomous:Copia	Ivana	yes	GAG|Ivana PROT|Ivana INT|Ivana RT|Ivana RH|Ivana
NC_029257.1-17529801-17534821-Oryza_sativa_Japonica	NC_029257.1	17529801	17534821	5020	Nonautonomous:Copia	Ale	yes	GAG|Ale PROT|Ale INT|Ale RT|Ale RH|Ale
NC_029257.1-18040187-18045412-Oryza_sativa_Japonica	NC_029257.1	18040187	18045412	5225	Autonomous:Copia	Ale	yes	GAG|Ale PROT|Ale INT|Ale RT|Ale RH|Ale
NC_029257.1-24397080-24403487-Oryza_sativa_Japonica	NC_029257.1	24397080	24403487	6407	Nonautonomous:Gypsy	Reina	yes	GAG|Reina PROT|Reina RT|Reina RH|Reina INT|Reina CHD|Reina
NC_029257.1-25243579-25250030-Oryza_sativa_Japonica	NC_029257.1	25243579	25250030	6451	Nonautonomous:Copia	Ikeros	yes	GAG|Ikeros PROT|Ikeros INT|Ikeros RT|Ikeros RH|Ikeros
NC_029257.1-29532924-29544699-Oryza_sativa_Japonica	NC_029257.1	29532924	29544699	11775	Nonautonomous:Gypsy	Reina	no	CHD|Reina INT|Reina GAG|Retand RH|Reina RT|Reina PROT|Reina
NC_029257.1-29534662-29541129-Oryza_sativa_Japonica	NC_029257.1	29534662	29541129	6467	Nonautonomous:Gypsy	Retand	no	GAG|Retand PROT|Retand RT|Retand
NC_029257.1-32073353-32079096-Oryza_sativa_Japonica	NC_029257.1	32073353	32079096	5743	Nonautonomous:Copia	Ivana	yes	GAG|Ivana PROT|Ivana INT|Ivana RT|Ivana RH|Ivana
NC_029257.1-34311563-34322579-Oryza_sativa_Japonica	NC_029257.1	34311563	34322579	11016	Nonautonomous:Gypsy	Retand	yes	GAG|Retand PROT|Retand RT|Retand RH|Retand INT|Retand
NC_029258.1-1805948-1811715-Oryza_sativa_Japonica	NC_029258.1	1805948	1811715	5767	Autonomous:Copia	Ivana	yes	GAG|Ivana PROT|Ivana INT|Ivana RT|Ivana RH|Ivana
NC_029258.1-1910819-1916523-Oryza_sativa_Japonica	NC_029258.1	1910819	1916523	5704	Autonomous:Copia	Ivana	yes	GAG|Ivana PROT|Ivana INT|Ivana RT|Ivana RH|Ivana
NC_029258.1-2619077-2624315-Oryza_sativa_Japonica	NC_029258.1	2619077	2624315	5238	Nonautonomous:Gypsy	Reina	yes	GAG|Reina PROT|Reina RT|Reina RH|Reina INT|Reina CHD|Reina
NC_029258.1-13265141-13271369-Oryza_sativa_Japonica	NC_029258.1	13265141	13271369	6228	Nonautonomous:Copia	Ikeros	no	GAG|Ikeros PROT|Ikeros RT|Ikeros RH|Ikeros
NC_029258.1-13850184-13856824-Oryza_sativa_Japonica	NC_029258.1	13850184	13856824	6640	Nonautonomous:Copia	Ivana	yes	GAG|Ivana PROT|Ivana INT|Ivana RT|Ivana RH|Ivana
NC_029258.1-14730285-14735495-Oryza_sativa_Japonica	NC_029258.1	14730285	14735495	5210	Nonautonomous:Copia	Ale	yes	GAG|Ale PROT|Ale INT|Ale RT|Ale RH|Ale
NC_029258.1-29707049-29717114-Oryza_sativa_Japonica	NC_029258.1	29707049	29717114	10065	Nonautonomous:Gypsy	Retand	no	GAG|Retand PROT|Retand RT|Retand
NC_029258.1-35847969-35853250-Oryza_sativa_Japonica	NC_029258.1	35847969	35853250	5281	Nonautonomous:Copia	Ale	yes	GAG|Ale PROT|Ale INT|Ale RT|Ale RH|Ale
NC_029259.1-7930216-7935830-Oryza_sativa_Japonica	NC_029259.1	7930216	7935830	5614	Nonautonomous:Gypsy	Reina	yes	GAG|Reina PROT|Reina RT|Reina RH|Reina INT|Reina CHD|Reina
NC_029259.1-17745790-17751876-Oryza_sativa_Japonica	NC_029259.1	17745790	17751876	6086	Nonautonomous:Copia	Ikeros	no	GAG|Ikeros PROT|Ikeros RT|Ikeros RH|Ikeros
NC_029259.1-17849092-17858102-Oryza_sativa_Japonica	NC_029259.1	17849092	17858102	9010	Nonautonomous:Unknown	none	none	none
NC_029259.1-24624985-24630739-Oryza_sativa_Japonica	NC_029259.1	24624985	24630739	5754	Nonautonomous:Copia	Ivana	yes	GAG|Ivana PROT|Ivana INT|Ivana RT|Ivana RH|Ivana
NC_029259.1-26160198-26164928-Oryza_sativa_Japonica	NC_029259.1	26160198	26164928	4730	Nonautonomous:BARE-2	Ale	no	PROT|Ale INT|Ale RT|Ale RH|Ale
NC_029259.1-29687982-29699293-Oryza_sativa_Japonica	NC_029259.1	29687982	29699293	11311	Nonautonomous:Gypsy	Retand	yes	GAG|Retand PROT|Retand RT|Retand RH|Retand INT|Retand
NC_029259.1-31729294-31740619-Oryza_sativa_Japonica	NC_029259.1	31729294	31740619	11325	Nonautonomous:Gypsy	Retand	yes	GAG|Retand PROT|Retand RT|Retand RH|Retand INT|Retand
NC_029259.1-31883262-31887715-Oryza_sativa_Japonica	NC_029259.1	31883262	31887715	4453	Nonautonomous:Copia	Ale	no	PROT|Ale INT|Ale RT|Ale RH|Ale
NC_029259.1-32304161-32323495-Oryza_sativa_Japonica	NC_029259.1	32304161	32323495	19334	Nonautonomous:Copia	Ikeros	no	RT|Retand RH|Retand INT|Ikeros PROT|Ikeros GAG|Ikeros
NC_029259.1-35194698-35206268-Oryza_sativa_Japonica	NC_029259.1	35194698	35206268	11570	Nonautonomous:Gypsy	Retand	yes	GAG|Retand PROT|Retand RT|Retand RH|Retand INT|Retand
NC_029260.1-18173190-18178854-Oryza_sativa_Japonica	NC_029260.1	18173190	18178854	5664	Nonautonomous:Copia	Ivana	yes	GAG|Ivana PROT|Ivana INT|Ivana RT|Ivana RH|Ivana
NC_029260.1-26206795-26211613-Oryza_sativa_Japonica	NC_029260.1	26206795	26211613	4818	Nonautonomous:Copia	Ale	yes	GAG|Ale PROT|Ale INT|Ale RT|Ale RH|Ale
NC_029261.1-2216685-2229594-Oryza_sativa_Japonica	NC_029261.1	2216685	2229594	12909	Nonautonomous:Gypsy	Retand	yes	GAG|Retand PROT|Retand RT|Retand RH|Retand INT|Retand
NC_029261.1-3207026-3212700-Oryza_sativa_Japonica	NC_029261.1	3207026	3212700	5674	Nonautonomous:Copia	Ivana	yes	GAG|Ivana PROT|Ivana INT|Ivana RT|Ivana RH|Ivana
NC_029261.1-9874363-9887524-Oryza_sativa_Japonica	NC_029261.1	9874363	9887524	13161	Nonautonomous:Gypsy	Retand	yes	GAG|Retand PROT|Retand RT|Retand RH|Retand INT|Retand
NC_029261.1-16765615-16768298-Oryza_sativa_Japonica	NC_029261.1	16765615	16768298	2683	Nonautonomous:Unknown	none	none	none
NC_029261.1-17136029-17139827-Oryza_sativa_Japonica	NC_029261.1	17136029	17139827	3798	Nonautonomous:Copia	Ivana	no	PROT|Ivana INT|Ivana RT|Ivana RH|Ivana
NC_029261.1-17227844-17238464-Oryza_sativa_Japonica	NC_029261.1	17227844	17238464	10620	Nonautonomous:Gypsy	Retand	yes	GAG|Retand PROT|Retand RT|Retand RH|Retand INT|Retand
NC_029261.1-19051043-19062153-Oryza_sativa_Japonica	NC_029261.1	19051043	19062153	11110	Nonautonomous:Unknown	none	none	none
NC_029261.1-24824448-24829267-Oryza_sativa_Japonica	NC_029261.1	24824448	24829267	4819	Nonautonomous:Copia	Ale	yes	GAG|Ale PROT|Ale INT|Ale RT|Ale RH|Ale
NC_029262.1-5614530-5618969-Oryza_sativa_Japonica	NC_029262.1	5614530	5618969	4439	Nonautonomous:BARE-2	Ale	no	PROT|Ale INT|Ale RT|Ale RH|Ale
NC_029262.1-7245388-7253872-Oryza_sativa_Japonica	NC_029262.1	7245388	7253872	8484	Nonautonomous:Copia	SIRE	no	GAG|SIRE PROT|SIRE INT|SIRE RH|SIRE
NC_029262.1-7816959-7830115-Oryza_sativa_Japonica	NC_029262.1	7816959	7830115	13156	Nonautonomous:Gypsy	Retand	yes	GAG|Retand PROT|Retand RT|Retand RH|Retand INT|Retand
NC_029262.1-10190544-10195736-Oryza_sativa_Japonica	NC_029262.1	10190544	10195736	5192	Nonautonomous:Gypsy	Reina	yes	GAG|Reina PROT|Reina RT|Reina RH|Reina INT|Reina CHD|Reina
NC_029262.1-18379050-18392831-Oryza_sativa_Japonica	NC_029262.1	18379050	18392831	13781	Nonautonomous:Gypsy	Retand	yes	GAG|Retand PROT|Retand CHDCR|CRM RT|Retand RH|Retand INT|Retand
NC_029262.1-25196315-25208014-Oryza_sativa_Japonica	NC_029262.1	25196315	25208014	11699	Nonautonomous:Gypsy	Retand	yes	GAG|Retand PROT|Retand RT|Retand RH|Retand INT|Retand
NC_029262.1-26567740-26579039-Oryza_sativa_Japonica	NC_029262.1	26567740	26579039	11299	Nonautonomous:Gypsy	Retand	yes	GAG|Retand PROT|Retand RT|Retand RH|Retand INT|Retand
NC_029262.1-28811666-28816490-Oryza_sativa_Japonica	NC_029262.1	28811666	28816490	4824	Nonautonomous:Copia	Ale	yes	GAG|Ale PROT|Ale INT|Ale RT|Ale RH|Ale
NC_029262.1-29366253-29369571-Oryza_sativa_Japonica	NC_029262.1	29366253	29369571	3318	Nonautonomous:Copia	Ale	yes	GAG|Ale PROT|Ale INT|Ale RT|Ale RH|Ale
NC_029263.1-5945267-5950837-Oryza_sativa_Japonica	NC_029263.1	5945267	5950837	5570	Nonautonomous:Gypsy	Reina	yes	GAG|Reina PROT|Reina RT|Reina RH|Reina INT|Reina CHD|Reina
NC_029263.1-9051835-9057548-Oryza_sativa_Japonica	NC_029263.1	9051835	9057548	5713	Nonautonomous:Copia	Ivana	yes	GAG|Ivana PROT|Ivana INT|Ivana RT|Ivana RH|Ivana
NC_029263.1-14745768-14751451-Oryza_sativa_Japonica	NC_029263.1	14745768	14751451	5683	Nonautonomous:Copia	Ivana	yes	GAG|Ivana PROT|Ivana INT|Ivana RT|Ivana RH|Ivana
NC_029263.1-14891685-14902993-Oryza_sativa_Japonica	NC_029263.1	14891685	14902993	11308	Nonautonomous:Gypsy	Retand	yes	GAG|Retand PROT|Retand RT|Retand RH|Retand INT|Retand
NC_029263.1-16926553-16937979-Oryza_sativa_Japonica	NC_029263.1	16926553	16937979	11426	Nonautonomous:Gypsy	Retand	no	GAG|Retand PROT|Retand RT|Retand RH|Retand INT|Retand
NC_029263.1-22059851-22065251-Oryza_sativa_Japonica	NC_029263.1	22059851	22065251	5400	Nonautonomous:Gypsy	Reina	yes	GAG|Reina PROT|Reina RT|Reina RH|Reina INT|Reina CHD|Reina
NC_029263.1-22303547-22316075-Oryza_sativa_Japonica	NC_029263.1	22303547	22316075	12528	Nonautonomous:Gypsy	Retand	yes	GAG|Retand PROT|Retand RT|Retand RH|Retand INT|Retand
NC_029263.1-28401943-28407130-Oryza_sativa_Japonica	NC_029263.1	28401943	28407130	5187	Nonautonomous:Gypsy	Reina	yes	GAG|Reina PROT|Reina RT|Reina RH|Reina INT|Reina CHD|Reina
NC_029264.1-1229143-1234794-Oryza_sativa_Japonica	NC_029264.1	1229143	1234794	5651	Autonomous:Copia	Ivana	yes	GAG|Ivana PROT|Ivana INT|Ivana RT|Ivana RH|Ivana
NC_029264.1-1864224-1877224-Oryza_sativa_Japonica	NC_029264.1	1864224	1877224	13000	Autonomous:Gypsy	Retand	yes	GAG|Retand PROT|Retand RT|Retand RH|Retand INT|Retand
NC_029264.1-3871448-3882789-Oryza_sativa_Japonica	NC_029264.1	3871448	3882789	11341	Nonautonomous:Gypsy	Retand	yes	GAG|Retand PROT|Retand RT|Retand RH|Retand INT|Retand
NC_029264.1-8811327-8828611-Oryza_sativa_Japonica	NC_029264.1	8811327	8828611	17284	Nonautonomous:Gypsy	Retand	yes	GAG|Retand PROT|Retand RT|Retand RH|Retand INT|Retand
NC_029264.1-11495141-11504337-Oryza_sativa_Japonica	NC_029264.1	11495141	11504337	9196	Nonautonomous:Copia	SIRE	yes	GAG|SIRE PROT|SIRE INT|SIRE RT|SIRE RH|SIRE
NC_029264.1-19370946-19376704-Oryza_sativa_Japonica	NC_029264.1	19370946	19376704	5758	Autonomous:Copia	Ivana	yes	GAG|Ivana PROT|Ivana INT|Ivana RT|Ivana RH|Ivana
NC_029265.1-2215126-2219904-Oryza_sativa_Japonica	NC_029265.1	2215126	2219904	4778	Nonautonomous:Copia	Ale	yes	GAG|Ale PROT|Ale INT|Ale RT|Ale RH|Ale
NC_029265.1-8310953-8318302-Oryza_sativa_Japonica	NC_029265.1	8310953	8318302	7349	Nonautonomous:Unknown	none	none	none
NC_029265.1-15558148-15570395-Oryza_sativa_Japonica	NC_029265.1	15558148	15570395	12247	Nonautonomous:Gypsy	Tekay	yes	GAG|Tekay PROT|Tekay RT|Tekay RH|Tekay INT|Tekay CHD|Tekay
NC_029265.1-18476612-18482497-Oryza_sativa_Japonica	NC_029265.1	18476612	18482497	5885	Autonomous:Copia	Ivana	yes	GAG|Ivana PROT|Ivana INT|Ivana RT|Ivana RH|Ivana
NC_029265.1-22300476-22306185-Oryza_sativa_Japonica	NC_029265.1	22300476	22306185	5709	Nonautonomous:Copia	Ivana	yes	GAG|Ivana PROT|Ivana INT|Ivana RT|Ivana RH|Ivana
NC_029266.1-3185453-3194345-Oryza_sativa_Japonica	NC_029266.1	3185453	3194345	8892	Nonautonomous:Copia	SIRE	yes	GAG|SIRE PROT|SIRE INT|SIRE RT|SIRE RH|SIRE
NC_029266.1-5547212-5553097-Oryza_sativa_Japonica	NC_029266.1	5547212	5553097	5885	Nonautonomous:Copia	Ikeros	no	GAG|Ikeros PROT|Ikeros RT|Ikeros RH|Ikeros
NC_029266.1-15641081-15652453-Oryza_sativa_Japonica	NC_029266.1	15641081	15652453	11372	Nonautonomous:Gypsy	Retand	yes	GAG|Retand PROT|Retand RT|Retand RH|Retand INT|Retand
NC_029266.1-21223777-21232733-Oryza_sativa_Japonica	NC_029266.1	21223777	21232733	8956	Nonautonomous:Copia	Ale	yes	GAG|Ale PROT|Ale INT|Ale RT|Ale RH|Ale
NC_029266.1-24424047-24437035-Oryza_sativa_Japonica	NC_029266.1	24424047	24437035	12988	Nonautonomous:Gypsy	Retand	yes	GAG|Retand PROT|Retand RT|Retand RH|Retand INT|Retand
NC_029266.1-26924786-26931700-Oryza_sativa_Japonica	NC_029266.1	26924786	26931700	6914	Nonautonomous:Copia	Ikeros	yes	GAG|Ikeros PROT|Ikeros INT|Ikeros RT|Ikeros RH|Ikeros
NC_029266.1-27101202-27105643-Oryza_sativa_Japonica	NC_029266.1	27101202	27105643	4441	Nonautonomous:Copia	Ale	no	PROT|Ale INT|Ale RT|Ale RH|Ale
NC_029266.1-27779418-27784822-Oryza_sativa_Japonica	NC_029266.1	27779418	27784822	5404	Nonautonomous:Gypsy	Reina	yes	GAG|Reina PROT|Reina RT|Reina RH|Reina INT|Reina CHD|Reina
NC_029267.1-4851235-4856947-Oryza_sativa_Japonica	NC_029267.1	4851235	4856947	5712	Nonautonomous:Copia	Ivana	yes	GAG|Ivana PROT|Ivana INT|Ivana RT|Ivana RH|Ivana
NC_029267.1-8611166-8622416-Oryza_sativa_Japonica	NC_029267.1	8611166	8622416	11250	Nonautonomous:Gypsy	Tekay	yes	GAG|Tekay PROT|Tekay RT|Tekay RH|Tekay INT|Tekay CHD|Tekay
NC_029267.1-9718814-9730192-Oryza_sativa_Japonica	NC_029267.1	9718814	9730192	11378	Nonautonomous:Unknown	none	none	none
NC_029267.1-18923529-18928982-Oryza_sativa_Japonica	NC_029267.1	18923529	18928982	5453	Nonautonomous:Gypsy	Reina	yes	GAG|Reina PROT|Reina RT|Reina RH|Reina INT|Reina CHD|Reina
NC_029267.1-22923436-22934767-Oryza_sativa_Japonica	NC_029267.1	22923436	22934767	11331	Nonautonomous:Gypsy	Retand	yes	GAG|Retand PROT|Retand RT|Retand RH|Retand INT|Retand
NC_029267.1-23149355-23155107-Oryza_sativa_Japonica	NC_029267.1	23149355	23155107	5752	Nonautonomous:Copia	Ivana	yes	GAG|Ivana PROT|Ivana INT|Ivana RT|Ivana RH|Ivana
NC_029257.1-2309996-2312155-Oryza_sativa_Japonica	NC_029257.1	2309996	2312155	2159	Nonautonomous:Copia	Ale	no	RT|Ale RH|Ale
NC_029257.1-3066375-3071099-Oryza_sativa_Japonica	NC_029257.1	3066375	3071099	4724	Autonomous:Copia	Ale	yes	GAG|Ale PROT|Ale INT|Ale RT|Ale RH|Ale
NC_029257.1-3114223-3119479-Oryza_sativa_Japonica	NC_029257.1	3114223	3119479	5256	Nonautonomous:Copia	Ale	yes	GAG|Ale PROT|Ale INT|Ale RT|Ale RH|Ale
NC_029257.1-12702782-12711963-Oryza_sativa_Japonica	NC_029257.1	12702782	12711963	9181	Nonautonomous:Copia	SIRE	yes	GAG|SIRE PROT|SIRE INT|SIRE RT|SIRE RH|SIRE
NC_029257.1-19035760-19041110-Oryza_sativa_Japonica	NC_029257.1	19035760	19041110	5350	Nonautonomous:Gypsy	Reina	yes	GAG|Reina PROT|Reina RT|Reina RH|Reina INT|Reina CHD|Reina
NC_029257.1-22957446-22962994-Oryza_sativa_Japonica	NC_029257.1	22957446	22962994	5548	Autonomous:Copia	Ivana	yes	GAG|Ivana PROT|Ivana INT|Ivana RT|Ivana RH|Ivana
NC_029257.1-26887525-26900427-Oryza_sativa_Japonica	NC_029257.1	26887525	26900427	12902	Nonautonomous:Gypsy	Retand	no	GAG|Retand PROT|Retand RT|Retand INT|Retand
NC_029258.1-2937274-2942556-Oryza_sativa_Japonica	NC_029258.1	2937274	2942556	5282	Nonautonomous:Copia	Ivana	yes	GAG|Ivana PROT|Ivana INT|Ivana RT|Ivana RH|Ivana
NC_029259.1-4261650-4267732-Oryza_sativa_Japonica	NC_029259.1	4261650	4267732	6082	Nonautonomous:Copia	Ale	no	GAG|Ale PROT|Ale INT|Ale RH|Ale
NC_029259.1-14486529-14492559-Oryza_sativa_Japonica	NC_029259.1	14486529	14492559	6030	Nonautonomous:Gypsy	Reina	yes	GAG|Reina PROT|Reina RT|Reina RH|Reina INT|Reina CHD|Reina
NC_029259.1-17286676-17297298-Oryza_sativa_Japonica	NC_029259.1	17286676	17297298	10622	Nonautonomous:Unknown	none	none	none
NC_029259.1-27918431-27930924-Oryza_sativa_Japonica	NC_029259.1	27918431	27930924	12493	Nonautonomous:Gypsy	Retand	yes	GAG|Retand PROT|Retand RT|Retand RH|Retand INT|Retand
NC_029260.1-18149385-18155122-Oryza_sativa_Japonica	NC_029260.1	18149385	18155122	5737	Nonautonomous:Copia	Ivana	yes	GAG|Ivana PROT|Ivana INT|Ivana RT|Ivana RH|Ivana
NC_029261.1-7469714-7474523-Oryza_sativa_Japonica	NC_029261.1	7469714	7474523	4809	Nonautonomous:Copia	Ale	yes	GAG|Ale PROT|Ale INT|Ale RT|Ale RH|Ale
NC_029263.1-26641053-26646118-Oryza_sativa_Japonica	NC_029263.1	26641053	26646118	5065	Nonautonomous:Copia	Ale	yes	GAG|Ale PROT|Ale INT|Ale RT|Ale RH|Ale
NC_029264.1-13504534-13515844-Oryza_sativa_Japonica	NC_029264.1	13504534	13515844	11310	Nonautonomous:Gypsy	Retand	yes	GAG|Retand PROT|Retand RT|Retand RH|Retand INT|Retand
NC_029265.1-7584329-7589460-Oryza_sativa_Japonica	NC_029265.1	7584329	7589460	5131	Nonautonomous:Gypsy	Reina	yes	GAG|Reina PROT|Reina RT|Reina RH|Reina INT|Reina CHD|Reina
NC_029265.1-9362584-9367242-Oryza_sativa_Japonica	NC_029265.1	9362584	9367242	4658	Nonautonomous:Copia	Tork	yes	GAG|Tork PROT|Tork INT|Tork RT|Tork RH|Tork
NC_029265.1-9713586-9719656-Oryza_sativa_Japonica	NC_029265.1	9713586	9719656	6070	Nonautonomous:Copia	Ikeros	no	GAG|Ikeros PROT|Ikeros RT|Ikeros RH|Ikeros
NC_029266.1-2717990-2723166-Oryza_sativa_Japonica	NC_029266.1	2717990	2723166	5176	Nonautonomous:Copia	Tork	yes	GAG|Tork PROT|Tork INT|Tork RT|Tork RH|Tork
NC_029266.1-4265348-4282824-Oryza_sativa_Japonica	NC_029266.1	4265348	4282824	17476	Nonautonomous:Gypsy	Tekay	yes	GAG|Tekay PROT|Tekay RT|Tekay RH|Tekay INT|Tekay CHD|Tekay
NC_029266.1-13583872-13591627-Oryza_sativa_Japonica	NC_029266.1	13583872	13591627	7755	Nonautonomous:Gypsy	CRM	yes	GAG|CRM PROT|CRM RT|CRM RH|CRM INT|CRM CHDCR|CRM
NC_029267.1-13938301-13943459-Oryza_sativa_Japonica	NC_029267.1	13938301	13943459	5158	Nonautonomous:Gypsy	Retand	no	GAG|Retand PROT|Retand

## Sheet: Ortho-groups unassigned LTR-RTs
Table S6: The 382 LTR-RT elements (PlantLTRdb) were unassigned to ortho-groups
LTR-RT ID	NCBI Accession	Start in sequence	End in sequence	LTR-RT Length	Classification	Clade	Internal domains complete	Internal domains
NC_029256.1-10951368-10957828-Oryza_sativa_Japonica	NC_029256.1	10951368	10957828	6460	Nonautonomous:Copia	TAR	yes	GAG|TAR PROT|TAR INT|TAR RT|TAR RH|TAR
NC_029256.1-11830911-11839793-Oryza_sativa_Japonica	NC_029256.1	11830911	11839793	8882	Nonautonomous:Gypsy	Ogre	yes	GAG|Ogre PROT|Ogre RT|Ogre RH|Ogre INT|Ogre
NC_029256.1-12033648-12054746-Oryza_sativa_Japonica	NC_029256.1	12033648	12054746	21098	Nonautonomous:Gypsy	Tekay	yes	GAG|Tekay PROT|Tekay RT|Tekay RH|Tekay INT|Tekay CHD|Tekay
NC_029256.1-12860725-12867176-Oryza_sativa_Japonica	NC_029256.1	12860725	12867176	6451	Nonautonomous:Copia	TAR	yes	GAG|TAR PROT|TAR INT|TAR RT|TAR RH|TAR
NC_029256.1-15301254-15307718-Oryza_sativa_Japonica	NC_029256.1	15301254	15307718	6464	Nonautonomous:Copia	TAR	yes	GAG|TAR PROT|TAR INT|TAR RT|TAR RH|TAR
NC_029256.1-15864696-15876644-Oryza_sativa_Japonica	NC_029256.1	15864696	15876644	11948	Nonautonomous:Gypsy	Tekay	yes	GAG|Tekay PROT|Tekay RT|Tekay RH|Tekay INT|Tekay CHD|Tekay
NC_029256.1-16600426-16606826-Oryza_sativa_Japonica	NC_029256.1	16600426	16606826	6400	Nonautonomous:Copia	TAR	yes	GAG|TAR PROT|TAR INT|TAR RT|TAR RH|TAR
NC_029256.1-17436250-17442720-Oryza_sativa_Japonica	NC_029256.1	17436250	17442720	6470	Nonautonomous:Copia	TAR	yes	GAG|TAR PROT|TAR INT|TAR RT|TAR RH|TAR
NC_029256.1-18909840-18918738-Oryza_sativa_Japonica	NC_029256.1	18909840	18918738	8898	Nonautonomous:Gypsy	Ogre	yes	GAG|Ogre PROT|Ogre RT|Ogre RH|Ogre INT|Ogre
NC_029256.1-20365147-20371611-Oryza_sativa_Japonica	NC_029256.1	20365147	20371611	6464	Nonautonomous:Copia	TAR	yes	GAG|TAR PROT|TAR INT|TAR RT|TAR RH|TAR
NC_029256.1-20611253-20617728-Oryza_sativa_Japonica	NC_029256.1	20611253	20617728	6475	Nonautonomous:Copia	TAR	yes	GAG|TAR PROT|TAR INT|TAR RT|TAR RH|TAR
NC_029256.1-22294728-22301189-Oryza_sativa_Japonica	NC_029256.1	22294728	22301189	6461	Nonautonomous:Copia	TAR	yes	GAG|TAR PROT|TAR INT|TAR RT|TAR RH|TAR
NC_029256.1-22508715-22520668-Oryza_sativa_Japonica	NC_029256.1	22508715	22520668	11953	Nonautonomous:Gypsy	Tekay	yes	GAG|Tekay PROT|Tekay RT|Tekay RH|Tekay INT|Tekay CHD|Tekay
NC_029256.1-23502314-23508739-Oryza_sativa_Japonica	NC_029256.1	23502314	23508739	6425	Nonautonomous:Copia	TAR	yes	GAG|TAR PROT|TAR INT|TAR RT|TAR RH|TAR
NC_029256.1-25804386-25816373-Oryza_sativa_Japonica	NC_029256.1	25804386	25816373	11987	Nonautonomous:Gypsy	Tekay	yes	GAG|Tekay PROT|Tekay RT|Tekay RH|Tekay INT|Tekay CHD|Tekay
NC_029256.1-26942846-26954870-Oryza_sativa_Japonica	NC_029256.1	26942846	26954870	12024	Nonautonomous:Gypsy	Tekay	yes	GAG|Tekay PROT|Tekay RT|Tekay RH|Tekay INT|Tekay CHD|Tekay
NC_029256.1-27899246-27905687-Oryza_sativa_Japonica	NC_029256.1	27899246	27905687	6441	Nonautonomous:Copia	TAR	yes	GAG|TAR PROT|TAR INT|TAR RT|TAR RH|TAR
NC_029256.1-28839995-28846442-Oryza_sativa_Japonica	NC_029256.1	28839995	28846442	6447	Nonautonomous:Copia	TAR	yes	GAG|TAR PROT|TAR INT|TAR RT|TAR RH|TAR
NC_029256.1-36545263-36557258-Oryza_sativa_Japonica	NC_029256.1	36545263	36557258	11995	Nonautonomous:Gypsy	Tekay	yes	GAG|Tekay PROT|Tekay RT|Tekay RH|Tekay INT|Tekay CHD|Tekay
NC_029256.1-6161928-6167723-Oryza_sativa_Japonica	NC_029256.1	6161928	6167723	5795	Nonautonomous:Copia	TAR	yes	GAG|TAR PROT|TAR INT|TAR RT|TAR RH|TAR
NC_029256.1-9214585-9220985-Oryza_sativa_Japonica	NC_029256.1	9214585	9220985	6400	Nonautonomous:Copia	TAR	yes	GAG|TAR PROT|TAR INT|TAR RT|TAR RH|TAR
NC_029257.1-10621619-10628092-Oryza_sativa_Japonica	NC_029257.1	10621619	10628092	6473	Nonautonomous:Copia	TAR	yes	GAG|TAR PROT|TAR INT|TAR RT|TAR RH|TAR
NC_029257.1-138434-144893-Oryza_sativa_Japonica	NC_029257.1	138434	144893	6459	Nonautonomous:Copia	TAR	yes	GAG|TAR PROT|TAR INT|TAR RT|TAR RH|TAR
NC_029257.1-16097165-16103572-Oryza_sativa_Japonica	NC_029257.1	16097165	16103572	6407	Nonautonomous:Copia	TAR	yes	GAG|TAR PROT|TAR INT|TAR RT|TAR RH|TAR
NC_029257.1-17917386-17926462-Oryza_sativa_Japonica	NC_029257.1	17917386	17926462	9076	Nonautonomous:Gypsy	Ogre	yes	GAG|Ogre PROT|Ogre RT|Ogre RH|Ogre INT|Ogre
NC_029257.1-32215838-32222290-Oryza_sativa_Japonica	NC_029257.1	32215838	32222290	6452	Nonautonomous:Copia	TAR	yes	GAG|TAR PROT|TAR INT|TAR RT|TAR RH|TAR
NC_029257.1-7557167-7563594-Oryza_sativa_Japonica	NC_029257.1	7557167	7563594	6427	Nonautonomous:Copia	TAR	yes	GAG|TAR PROT|TAR INT|TAR RT|TAR RH|TAR
NC_029257.1-9074559-9080966-Oryza_sativa_Japonica	NC_029257.1	9074559	9080966	6407	Nonautonomous:Copia	TAR	yes	GAG|TAR PROT|TAR INT|TAR RT|TAR RH|TAR
NC_029258.1-13358147-13369922-Oryza_sativa_Japonica	NC_029258.1	13358147	13369922	11775	Nonautonomous:Gypsy	Tekay	yes	GAG|Tekay PROT|Tekay RT|Tekay RH|Tekay INT|Tekay CHD|Tekay
NC_029258.1-17729938-17736395-Oryza_sativa_Japonica	NC_029258.1	17729938	17736395	6457	Nonautonomous:Copia	TAR	yes	GAG|TAR PROT|TAR INT|TAR RT|TAR RH|TAR
NC_029258.1-19150515-19162182-Oryza_sativa_Japonica	NC_029258.1	19150515	19162182	11667	Nonautonomous:Copia	SIRE	yes	GAG|SIRE PROT|SIRE INT|SIRE RT|SIRE RH|SIRE
NC_029258.1-19229441-19235885-Oryza_sativa_Japonica	NC_029258.1	19229441	19235885	6444	Nonautonomous:Copia	TAR	yes	GAG|TAR PROT|TAR INT|TAR RT|TAR RH|TAR
NC_029258.1-19639792-19651760-Oryza_sativa_Japonica	NC_029258.1	19639792	19651760	11968	Nonautonomous:Gypsy	Tekay	yes	GAG|Tekay PROT|Tekay RT|Tekay RH|Tekay INT|Tekay CHD|Tekay
NC_029258.1-22785664-22792107-Oryza_sativa_Japonica	NC_029258.1	22785664	22792107	6443	Nonautonomous:Copia	TAR	yes	GAG|TAR PROT|TAR INT|TAR RT|TAR RH|TAR
NC_029258.1-28278914-28285385-Oryza_sativa_Japonica	NC_029258.1	28278914	28285385	6471	Nonautonomous:Copia	TAR	yes	GAG|TAR PROT|TAR INT|TAR RT|TAR RH|TAR
NC_029258.1-30711277-30720517-Oryza_sativa_Japonica	NC_029258.1	30711277	30720517	9240	Nonautonomous:Copia	TAR	yes	GAG|TAR PROT|TAR INT|TAR RT|TAR RH|TAR CHD|Reina
NC_029258.1-32282312-32288715-Oryza_sativa_Japonica	NC_029258.1	32282312	32288715	6403	Nonautonomous:Copia	TAR	yes	GAG|TAR PROT|TAR INT|TAR RT|TAR RH|TAR
NC_029258.1-34247219-34253658-Oryza_sativa_Japonica	NC_029258.1	34247219	34253658	6439	Nonautonomous:Copia	TAR	yes	GAG|TAR PROT|TAR INT|TAR RT|TAR RH|TAR
NC_029258.1-581205-587668-Oryza_sativa_Japonica	NC_029258.1	581205	587668	6463	Nonautonomous:Copia	TAR	yes	GAG|TAR PROT|TAR INT|TAR RT|TAR RH|TAR
NC_029258.1-6206390-6212799-Oryza_sativa_Japonica	NC_029258.1	6206390	6212799	6409	Nonautonomous:Copia	TAR	yes	GAG|TAR PROT|TAR INT|TAR RT|TAR RH|TAR
NC_029259.1-10270770-10282781-Oryza_sativa_Japonica	NC_029259.1	10270770	10282781	12011	Nonautonomous:Gypsy	Tekay	yes	GAG|Tekay PROT|Tekay RT|Tekay RH|Tekay INT|Tekay CHD|Tekay
NC_029259.1-10962270-10974246-Oryza_sativa_Japonica	NC_029259.1	10962270	10974246	11976	Nonautonomous:Gypsy	Tekay	yes	GAG|Tekay PROT|Tekay RT|Tekay RH|Tekay INT|Tekay CHD|Tekay
NC_029259.1-11121270-11127677-Oryza_sativa_Japonica	NC_029259.1	11121270	11127677	6407	Nonautonomous:Copia	TAR	yes	GAG|TAR PROT|TAR INT|TAR RT|TAR RH|TAR
NC_029259.1-11537413-11543867-Oryza_sativa_Japonica	NC_029259.1	11537413	11543867	6454	Nonautonomous:Copia	TAR	yes	GAG|TAR PROT|TAR INT|TAR RT|TAR RH|TAR
NC_029259.1-11697869-11709883-Oryza_sativa_Japonica	NC_029259.1	11697869	11709883	12014	Nonautonomous:Gypsy	Tekay	yes	GAG|Tekay PROT|Tekay RT|Tekay RH|Tekay INT|Tekay CHD|Tekay
NC_029259.1-17797600-17810389-Oryza_sativa_Japonica	NC_029259.1	17797600	17810389	12789	Nonautonomous:Gypsy	Ogre	yes	GAG|Ogre PROT|Ogre RT|Ogre RH|Ogre INT|Ogre
NC_029259.1-18576873-18583332-Oryza_sativa_Japonica	NC_029259.1	18576873	18583332	6459	Nonautonomous:Copia	TAR	yes	GAG|TAR PROT|TAR INT|TAR RT|TAR RH|TAR
NC_029259.1-20628818-20635257-Oryza_sativa_Japonica	NC_029259.1	20628818	20635257	6439	Nonautonomous:Copia	TAR	yes	GAG|TAR PROT|TAR INT|TAR RT|TAR RH|TAR
NC_029259.1-24728608-24738651-Oryza_sativa_Japonica	NC_029259.1	24728608	24738651	10043	Nonautonomous:Copia	TAR	yes	GAG|TAR PROT|TAR INT|TAR RT|TAR RH|TAR
NC_029259.1-28243828-28250255-Oryza_sativa_Japonica	NC_029259.1	28243828	28250255	6427	Nonautonomous:Copia	TAR	yes	GAG|TAR PROT|TAR INT|TAR RT|TAR RH|TAR
NC_029259.1-28730568-28737377-Oryza_sativa_Japonica	NC_029259.1	28730568	28737377	6809	Nonautonomous:Gypsy	Reina	yes	GAG|Reina PROT|Reina RT|Reina RH|Reina INT|Reina CHD|Reina
NC_029259.1-29594968-29601391-Oryza_sativa_Japonica	NC_029259.1	29594968	29601391	6423	Nonautonomous:Copia	TAR	yes	GAG|TAR PROT|TAR INT|TAR RT|TAR RH|TAR
NC_029259.1-3153480-3165171-Oryza_sativa_Japonica	NC_029259.1	3153480	3165171	11691	Nonautonomous:Gypsy	Tekay	yes	GAG|Tekay PROT|Tekay RT|Tekay RH|Tekay INT|Tekay CHD|Tekay
NC_029259.1-4091305-4103288-Oryza_sativa_Japonica	NC_029259.1	4091305	4103288	11983	Nonautonomous:Gypsy	Tekay	yes	GAG|Tekay PROT|Tekay RT|Tekay RH|Tekay INT|Tekay CHD|Tekay
NC_029259.1-4784353-4790812-Oryza_sativa_Japonica	NC_029259.1	4784353	4790812	6459	Nonautonomous:Copia	TAR	yes	GAG|TAR PROT|TAR INT|TAR RT|TAR RH|TAR
NC_029259.1-7810608-7822222-Oryza_sativa_Japonica	NC_029259.1	7810608	7822222	11614	Nonautonomous:Gypsy	Tekay	yes	GAG|Tekay PROT|Tekay RT|Tekay RH|Tekay INT|Tekay CHD|Tekay
NC_029259.1-9318822-9325248-Oryza_sativa_Japonica	NC_029259.1	9318822	9325248	6426	Nonautonomous:Copia	TAR	yes	GAG|TAR PROT|TAR INT|TAR RT|TAR RH|TAR
NC_029259.1-9982103-9988564-Oryza_sativa_Japonica	NC_029259.1	9982103	9988564	6461	Nonautonomous:Copia	TAR	yes	GAG|TAR PROT|TAR INT|TAR RT|TAR RH|TAR
NC_029260.1-11452503-11464439-Oryza_sativa_Japonica	NC_029260.1	11452503	11464439	11936	Nonautonomous:Gypsy	Tekay	yes	GAG|Tekay PROT|Tekay RT|Tekay RH|Tekay INT|Tekay CHD|Tekay
NC_029260.1-11769159-11781162-Oryza_sativa_Japonica	NC_029260.1	11769159	11781162	12003	Nonautonomous:Gypsy	Tekay	yes	GAG|Tekay PROT|Tekay RT|Tekay RH|Tekay INT|Tekay CHD|Tekay
NC_029260.1-14280936-14292721-Oryza_sativa_Japonica	NC_029260.1	14280936	14292721	11785	Nonautonomous:Gypsy	Tekay	yes	GAG|Tekay PROT|Tekay RT|Tekay RH|Tekay INT|Tekay CHD|Tekay
NC_029260.1-16071737-16078086-Oryza_sativa_Japonica	NC_029260.1	16071737	16078086	6349	Nonautonomous:Copia	TAR	yes	GAG|TAR PROT|TAR INT|TAR RT|TAR RH|TAR
NC_029260.1-16171639-16178057-Oryza_sativa_Japonica	NC_029260.1	16171639	16178057	6418	Nonautonomous:Copia	TAR	yes	GAG|TAR PROT|TAR INT|TAR RT|TAR RH|TAR
NC_029260.1-17186632-17192982-Oryza_sativa_Japonica	NC_029260.1	17186632	17192982	6350	Nonautonomous:Copia	TAR	yes	GAG|TAR PROT|TAR INT|TAR RT|TAR RH|TAR
NC_029260.1-19909547-19915980-Oryza_sativa_Japonica	NC_029260.1	19909547	19915980	6433	Nonautonomous:Copia	TAR	yes	GAG|TAR PROT|TAR INT|TAR RT|TAR RH|TAR
NC_029260.1-21660130-21666574-Oryza_sativa_Japonica	NC_029260.1	21660130	21666574	6444	Nonautonomous:Copia	TAR	yes	GAG|TAR PROT|TAR INT|TAR RT|TAR RH|TAR
NC_029260.1-2232721-2239177-Oryza_sativa_Japonica	NC_029260.1	2232721	2239177	6456	Nonautonomous:Copia	TAR	yes	GAG|TAR PROT|TAR INT|TAR RT|TAR RH|TAR
NC_029260.1-23121511-23131843-Oryza_sativa_Japonica	NC_029260.1	23121511	23131843	10332	Nonautonomous:Copia	TAR	yes	GAG|TAR PROT|TAR INT|TAR RT|TAR RH|TAR
NC_029260.1-28404804-28411300-Oryza_sativa_Japonica	NC_029260.1	28404804	28411300	6496	Nonautonomous:Copia	TAR	yes	GAG|TAR PROT|TAR INT|TAR RT|TAR RH|TAR
NC_029260.1-28456409-28462860-Oryza_sativa_Japonica	NC_029260.1	28456409	28462860	6451	Nonautonomous:Copia	TAR	yes	GAG|TAR PROT|TAR INT|TAR RT|TAR RH|TAR
NC_029260.1-29348794-29355220-Oryza_sativa_Japonica	NC_029260.1	29348794	29355220	6426	Nonautonomous:Copia	TAR	yes	GAG|TAR PROT|TAR INT|TAR RT|TAR RH|TAR
NC_029260.1-8921406-8927808-Oryza_sativa_Japonica	NC_029260.1	8921406	8927808	6402	Nonautonomous:Copia	TAR	yes	GAG|TAR PROT|TAR INT|TAR RT|TAR RH|TAR
NC_029261.1-10661601-10673597-Oryza_sativa_Japonica	NC_029261.1	10661601	10673597	11996	Nonautonomous:Gypsy	Tekay	yes	GAG|Tekay PROT|Tekay RT|Tekay RH|Tekay INT|Tekay CHD|Tekay
NC_029261.1-10825494-10831942-Oryza_sativa_Japonica	NC_029261.1	10825494	10831942	6448	Nonautonomous:Copia	TAR	yes	GAG|TAR PROT|TAR INT|TAR RT|TAR RH|TAR
NC_029261.1-11409048-11421035-Oryza_sativa_Japonica	NC_029261.1	11409048	11421035	11987	Nonautonomous:Gypsy	Tekay	yes	GAG|Tekay PROT|Tekay RT|Tekay RH|Tekay INT|Tekay CHD|Tekay
NC_029261.1-1275575-1287827-Oryza_sativa_Japonica	NC_029261.1	1275575	1287827	12252	Nonautonomous:Copia	TAR	yes	GAG|TAR PROT|TAR INT|TAR RT|TAR RH|TAR
NC_029261.1-14254955-14261382-Oryza_sativa_Japonica	NC_029261.1	14254955	14261382	6427	Nonautonomous:Copia	TAR	yes	GAG|TAR PROT|TAR INT|TAR RT|TAR RH|TAR
NC_029261.1-16075623-16084497-Oryza_sativa_Japonica	NC_029261.1	16075623	16084497	8874	Autonomous:Gypsy	Ogre	yes	GAG|Ogre PROT|Ogre RT|Ogre RH|Ogre INT|Ogre
NC_029261.1-16974550-16980720-Oryza_sativa_Japonica	NC_029261.1	16974550	16980720	6170	Nonautonomous:Copia	TAR	yes	GAG|TAR PROT|TAR INT|TAR RT|TAR RH|TAR
NC_029261.1-18600350-18611358-Oryza_sativa_Japonica	NC_029261.1	18600350	18611358	11008	Nonautonomous:Gypsy	Tekay	yes	GAG|Tekay PROT|Tekay RT|Tekay RH|Tekay INT|Tekay CHD|Tekay
NC_029261.1-19767018-19779020-Oryza_sativa_Japonica	NC_029261.1	19767018	19779020	12002	Nonautonomous:Gypsy	Tekay	yes	GAG|Tekay PROT|Tekay RT|Tekay RH|Tekay INT|Tekay CHD|Tekay
NC_029261.1-20737979-20744423-Oryza_sativa_Japonica	NC_029261.1	20737979	20744423	6444	Nonautonomous:Copia	TAR	yes	GAG|TAR PROT|TAR INT|TAR RT|TAR RH|TAR
NC_029261.1-21464803-21476817-Oryza_sativa_Japonica	NC_029261.1	21464803	21476817	12014	Nonautonomous:Gypsy	Tekay	yes	GAG|Tekay PROT|Tekay RT|Tekay RH|Tekay INT|Tekay CHD|Tekay
NC_029261.1-23043211-23049653-Oryza_sativa_Japonica	NC_029261.1	23043211	23049653	6442	Nonautonomous:Copia	TAR	yes	GAG|TAR PROT|TAR INT|TAR RT|TAR RH|TAR
NC_029261.1-23976353-23986270-Oryza_sativa_Japonica	NC_029261.1	23976353	23986270	9917	Nonautonomous:Gypsy	Tekay	yes	GAG|Tekay PROT|Tekay RT|Tekay RH|Tekay INT|Tekay CHD|Tekay
NC_029261.1-25935459-25941454-Oryza_sativa_Japonica	NC_029261.1	25935459	25941454	5995	Nonautonomous:Gypsy	Reina	yes	GAG|Reina PROT|Reina RT|Reina RH|Reina INT|Reina CHD|Reina
NC_029261.1-28933705-28940112-Oryza_sativa_Japonica	NC_029261.1	28933705	28940112	6407	Nonautonomous:Copia	TAR	yes	GAG|TAR PROT|TAR INT|TAR RT|TAR RH|TAR
NC_029261.1-30234793-30240448-Oryza_sativa_Japonica	NC_029261.1	30234793	30240448	5655	Nonautonomous:Gypsy	Reina	yes	GAG|Reina PROT|Reina RT|Reina RH|Reina INT|Reina CHD|Reina
NC_029261.1-4288980-4295413-Oryza_sativa_Japonica	NC_029261.1	4288980	4295413	6433	Nonautonomous:Copia	TAR	yes	GAG|TAR PROT|TAR INT|TAR RT|TAR RH|TAR
NC_029262.1-10023392-10029859-Oryza_sativa_Japonica	NC_029262.1	10023392	10029859	6467	Nonautonomous:Copia	TAR	yes	GAG|TAR PROT|TAR INT|TAR RT|TAR RH|TAR
NC_029262.1-12604482-12615152-Oryza_sativa_Japonica	NC_029262.1	12604482	12615152	10670	Nonautonomous:Copia	SIRE	yes	GAG|SIRE PROT|SIRE INT|SIRE RT|SIRE RH|SIRE
NC_029262.1-1484648-1491098-Oryza_sativa_Japonica	NC_029262.1	1484648	1491098	6450	Nonautonomous:Copia	TAR	yes	GAG|TAR PROT|TAR INT|TAR RT|TAR RH|TAR
NC_029262.1-15465388-15474472-Oryza_sativa_Japonica	NC_029262.1	15465388	15474472	9084	Nonautonomous:Gypsy	Ogre	yes	GAG|Ogre PROT|Ogre RT|Ogre RH|Ogre INT|Ogre
NC_029262.1-19112066-19118521-Oryza_sativa_Japonica	NC_029262.1	19112066	19118521	6455	Nonautonomous:Copia	TAR	yes	GAG|TAR PROT|TAR INT|TAR RT|TAR RH|TAR
NC_029262.1-20681225-20686773-Oryza_sativa_Japonica	NC_029262.1	20681225	20686773	5548	Nonautonomous:Gypsy	Reina	yes	GAG|Reina PROT|Reina RT|Reina RH|Reina INT|Reina CHD|Reina
NC_029262.1-20890067-20896518-Oryza_sativa_Japonica	NC_029262.1	20890067	20896518	6451	Nonautonomous:Copia	TAR	yes	GAG|TAR PROT|TAR INT|TAR RT|TAR RH|TAR
NC_029262.1-21679309-21685715-Oryza_sativa_Japonica	NC_029262.1	21679309	21685715	6406	Nonautonomous:Copia	TAR	yes	GAG|TAR PROT|TAR INT|TAR RT|TAR RH|TAR
NC_029262.1-22160132-22166573-Oryza_sativa_Japonica	NC_029262.1	22160132	22166573	6441	Nonautonomous:Copia	TAR	yes	GAG|TAR PROT|TAR INT|TAR RT|TAR RH|TAR
NC_029262.1-23774073-23780480-Oryza_sativa_Japonica	NC_029262.1	23774073	23780480	6407	Nonautonomous:Copia	TAR	yes	GAG|TAR PROT|TAR INT|TAR RT|TAR RH|TAR
NC_029262.1-25573094-25579524-Oryza_sativa_Japonica	NC_029262.1	25573094	25579524	6430	Nonautonomous:Copia	TAR	yes	GAG|TAR PROT|TAR INT|TAR RT|TAR RH|TAR
NC_029262.1-5202046-5207509-Oryza_sativa_Japonica	NC_029262.1	5202046	5207509	5463	Nonautonomous:Gypsy	Reina	yes	GAG|Reina PROT|Reina RT|Reina RH|Reina INT|Reina CHD|Reina
NC_029262.1-5390499-5402389-Oryza_sativa_Japonica	NC_029262.1	5390499	5402389	11890	Nonautonomous:Gypsy	Tekay	yes	GAG|Tekay PROT|Tekay RT|Tekay RH|Tekay INT|Tekay CHD|Tekay
NC_029262.1-9757066-9769035-Oryza_sativa_Japonica	NC_029262.1	9757066	9769035	11969	Nonautonomous:Gypsy	Tekay	yes	GAG|Tekay PROT|Tekay RT|Tekay RH|Tekay INT|Tekay CHD|Tekay
NC_029262.1-9838220-9853046-Oryza_sativa_Japonica	NC_029262.1	9838220	9853046	14826	Nonautonomous:Gypsy	Tekay	yes	GAG|Tekay PROT|Tekay RT|Tekay RH|Tekay INT|Tekay CHD|Tekay
NC_029263.1-10973947-10985944-Oryza_sativa_Japonica	NC_029263.1	10973947	10985944	11997	Nonautonomous:Gypsy	Tekay	yes	GAG|Tekay PROT|Tekay RT|Tekay RH|Tekay INT|Tekay CHD|Tekay
NC_029263.1-12122761-12129197-Oryza_sativa_Japonica	NC_029263.1	12122761	12129197	6436	Nonautonomous:Copia	TAR	yes	GAG|TAR PROT|TAR INT|TAR RT|TAR RH|TAR
NC_029263.1-12608467-12620428-Oryza_sativa_Japonica	NC_029263.1	12608467	12620428	11961	Nonautonomous:Gypsy	Tekay	yes	GAG|Tekay PROT|Tekay RT|Tekay RH|Tekay INT|Tekay CHD|Tekay
NC_029263.1-13127418-13136321-Oryza_sativa_Japonica	NC_029263.1	13127418	13136321	8903	Autonomous:Gypsy	Ogre	yes	GAG|Ogre PROT|Ogre RT|Ogre RH|Ogre INT|Ogre
NC_029263.1-14138699-14150367-Oryza_sativa_Japonica	NC_029263.1	14138699	14150367	11668	Nonautonomous:Gypsy	Tekay	yes	GAG|Tekay PROT|Tekay RT|Tekay RH|Tekay INT|Tekay CHD|Tekay
NC_029263.1-14214961-14221400-Oryza_sativa_Japonica	NC_029263.1	14214961	14221400	6439	Nonautonomous:Copia	TAR	yes	GAG|TAR PROT|TAR INT|TAR RT|TAR RH|TAR
NC_029263.1-1816740-1823155-Oryza_sativa_Japonica	NC_029263.1	1816740	1823155	6415	Nonautonomous:Copia	TAR	yes	GAG|TAR PROT|TAR INT|TAR RT|TAR RH|TAR
NC_029263.1-19129351-19138410-Oryza_sativa_Japonica	NC_029263.1	19129351	19138410	9059	Nonautonomous:Gypsy	Ogre	yes	GAG|Ogre PROT|Ogre RT|Ogre RH|Ogre INT|Ogre
NC_029263.1-22864766-22871245-Oryza_sativa_Japonica	NC_029263.1	22864766	22871245	6479	Nonautonomous:Copia	TAR	yes	GAG|TAR PROT|TAR INT|TAR RT|TAR RH|TAR
NC_029263.1-24429678-24435592-Oryza_sativa_Japonica	NC_029263.1	24429678	24435592	5914	Nonautonomous:Copia	TAR	yes	GAG|TAR PROT|TAR INT|TAR RT|TAR RH|TAR
NC_029263.1-26580251-26586685-Oryza_sativa_Japonica	NC_029263.1	26580251	26586685	6434	Nonautonomous:Copia	TAR	yes	GAG|TAR PROT|TAR INT|TAR RT|TAR RH|TAR
NC_029263.1-2664927-2671334-Oryza_sativa_Japonica	NC_029263.1	2664927	2671334	6407	Nonautonomous:Copia	TAR	yes	GAG|TAR PROT|TAR INT|TAR RT|TAR RH|TAR
NC_029263.1-2698829-2710840-Oryza_sativa_Japonica	NC_029263.1	2698829	2710840	12011	Nonautonomous:Gypsy	Tekay	yes	GAG|Tekay PROT|Tekay RT|Tekay RH|Tekay INT|Tekay CHD|Tekay
NC_029263.1-27523714-27530144-Oryza_sativa_Japonica	NC_029263.1	27523714	27530144	6430	Nonautonomous:Copia	TAR	yes	GAG|TAR PROT|TAR INT|TAR RT|TAR RH|TAR
NC_029263.1-3822671-3829073-Oryza_sativa_Japonica	NC_029263.1	3822671	3829073	6402	Nonautonomous:Copia	TAR	yes	GAG|TAR PROT|TAR INT|TAR RT|TAR RH|TAR
NC_029263.1-3851293-3857241-Oryza_sativa_Japonica	NC_029263.1	3851293	3857241	5948	Nonautonomous:Copia	Bianca	yes	GAG|Bianca PROT|Bianca INT|Bianca RT|Bianca RH|Bianca
NC_029263.1-4792636-4799059-Oryza_sativa_Japonica	NC_029263.1	4792636	4799059	6423	Nonautonomous:Copia	TAR	yes	GAG|TAR PROT|TAR INT|TAR RT|TAR RH|TAR
NC_029263.1-5291590-5303578-Oryza_sativa_Japonica	NC_029263.1	5291590	5303578	11988	Nonautonomous:Gypsy	Tekay	yes	GAG|Tekay PROT|Tekay RT|Tekay RH|Tekay INT|Tekay CHD|Tekay
NC_029263.1-6070826-6085177-Oryza_sativa_Japonica	NC_029263.1	6070826	6085177	14351	Nonautonomous:Gypsy	Ogre	yes	GAG|Ogre PROT|Ogre RT|Ogre RH|Ogre INT|Ogre
NC_029263.1-6695771-6707450-Oryza_sativa_Japonica	NC_029263.1	6695771	6707450	11679	Nonautonomous:Gypsy	Tekay	yes	GAG|Tekay PROT|Tekay RT|Tekay RH|Tekay INT|Tekay CHD|Tekay
NC_029263.1-6768197-6779841-Oryza_sativa_Japonica	NC_029263.1	6768197	6779841	11644	Nonautonomous:Gypsy	Tekay	yes	GAG|Tekay PROT|Tekay RT|Tekay RH|Tekay INT|Tekay CHD|Tekay
NC_029263.1-7924212-7930619-Oryza_sativa_Japonica	NC_029263.1	7924212	7930619	6407	Nonautonomous:Copia	TAR	yes	GAG|TAR PROT|TAR INT|TAR RT|TAR RH|TAR
NC_029264.1-10294690-10303588-Oryza_sativa_Japonica	NC_029264.1	10294690	10303588	8898	Autonomous:Gypsy	Ogre	yes	GAG|Ogre PROT|Ogre RT|Ogre RH|Ogre INT|Ogre
NC_029264.1-108774-123607-Oryza_sativa_Japonica	NC_029264.1	108774	123607	14833	Nonautonomous:Gypsy	Tekay	yes	GAG|Tekay PROT|Tekay RT|Tekay RH|Tekay INT|Tekay CHD|Tekay
NC_029264.1-11076269-11082672-Oryza_sativa_Japonica	NC_029264.1	11076269	11082672	6403	Nonautonomous:Copia	TAR	yes	GAG|TAR PROT|TAR INT|TAR RT|TAR RH|TAR
NC_029264.1-1247530-1254046-Oryza_sativa_Japonica	NC_029264.1	1247530	1254046	6516	Nonautonomous:Copia	TAR	yes	GAG|TAR PROT|TAR INT|TAR RT|TAR RH|TAR
NC_029264.1-12675901-12682309-Oryza_sativa_Japonica	NC_029264.1	12675901	12682309	6408	Nonautonomous:Copia	TAR	yes	GAG|TAR PROT|TAR INT|TAR RT|TAR RH|TAR
NC_029264.1-13645479-13651964-Oryza_sativa_Japonica	NC_029264.1	13645479	13651964	6485	Nonautonomous:Copia	TAR	yes	GAG|TAR PROT|TAR INT|TAR RT|TAR RH|TAR
NC_029264.1-1380385-1389196-Oryza_sativa_Japonica	NC_029264.1	1380385	1389196	8811	Nonautonomous:Gypsy	Ogre	yes	GAG|Ogre PROT|Ogre RT|Ogre RH|Ogre INT|Ogre
NC_029264.1-20696425-20702864-Oryza_sativa_Japonica	NC_029264.1	20696425	20702864	6439	Nonautonomous:Copia	TAR	yes	GAG|TAR PROT|TAR INT|TAR RT|TAR RH|TAR
NC_029264.1-2981488-2987919-Oryza_sativa_Japonica	NC_029264.1	2981488	2987919	6431	Nonautonomous:Copia	TAR	yes	GAG|TAR PROT|TAR INT|TAR RT|TAR RH|TAR
NC_029264.1-3844121-3849341-Oryza_sativa_Japonica	NC_029264.1	3844121	3849341	5220	Nonautonomous:Gypsy	Reina	yes	GAG|Reina PROT|Reina RT|Reina RH|Reina INT|Reina CHD|Reina
NC_029264.1-4123419-4135032-Oryza_sativa_Japonica	NC_029264.1	4123419	4135032	11613	Nonautonomous:Copia	SIRE	yes	GAG|SIRE PROT|SIRE INT|SIRE RT|SIRE RH|SIRE
NC_029264.1-6782902-6791267-Oryza_sativa_Japonica	NC_029264.1	6782902	6791267	8365	Autonomous:Gypsy	Ogre	yes	GAG|Ogre PROT|Ogre RT|Ogre RH|Ogre INT|Ogre
NC_029264.1-7618715-7630621-Oryza_sativa_Japonica	NC_029264.1	7618715	7630621	11906	Nonautonomous:Gypsy	Tekay	yes	GAG|Tekay PROT|Tekay RT|Tekay RH|Tekay INT|Tekay CHD|Tekay
NC_029264.1-7847815-7853388-Oryza_sativa_Japonica	NC_029264.1	7847815	7853388	5573	Nonautonomous:Gypsy	Reina	yes	GAG|Reina PROT|Reina RT|Reina RH|Reina INT|Reina CHD|Reina
NC_029265.1-19504515-19510922-Oryza_sativa_Japonica	NC_029265.1	19504515	19510922	6407	Nonautonomous:Copia	TAR	yes	GAG|TAR PROT|TAR INT|TAR RT|TAR RH|TAR
NC_029265.1-19655025-19661456-Oryza_sativa_Japonica	NC_029265.1	19655025	19661456	6431	Nonautonomous:Copia	TAR	yes	GAG|TAR PROT|TAR INT|TAR RT|TAR RH|TAR
NC_029265.1-5117307-5140861-Oryza_sativa_Japonica	NC_029265.1	5117307	5140861	23554	Nonautonomous:Gypsy	Tekay	yes	GAG|Tekay PROT|Tekay RT|Tekay RH|Tekay INT|Tekay CHD|Tekay
NC_029265.1-5123424-5135169-Oryza_sativa_Japonica	NC_029265.1	5123424	5135169	11745	Nonautonomous:Gypsy	Tekay	yes	GAG|Tekay PROT|Tekay RT|Tekay RH|Tekay INT|Tekay CHD|Tekay
NC_029265.1-6959412-6974464-Oryza_sativa_Japonica	NC_029265.1	6959412	6974464	15052	Nonautonomous:Gypsy	Tekay	yes	GAG|Tekay PROT|Tekay RT|Tekay RH|Tekay INT|Tekay CHD|Tekay
NC_029265.1-7316903-7328861-Oryza_sativa_Japonica	NC_029265.1	7316903	7328861	11958	Nonautonomous:Gypsy	Tekay	yes	GAG|Tekay PROT|Tekay RT|Tekay RH|Tekay INT|Tekay CHD|Tekay
NC_029266.1-10209096-10215566-Oryza_sativa_Japonica	NC_029266.1	10209096	10215566	6470	Nonautonomous:Copia	TAR	yes	GAG|TAR PROT|TAR INT|TAR RT|TAR RH|TAR
NC_029266.1-10991665-10998109-Oryza_sativa_Japonica	NC_029266.1	10991665	10998109	6444	Nonautonomous:Copia	TAR	yes	GAG|TAR PROT|TAR INT|TAR RT|TAR RH|TAR
NC_029266.1-11170407-11182379-Oryza_sativa_Japonica	NC_029266.1	11170407	11182379	11972	Nonautonomous:Gypsy	Tekay	yes	GAG|Tekay PROT|Tekay RT|Tekay RH|Tekay INT|Tekay CHD|Tekay
NC_029266.1-15394721-15400336-Oryza_sativa_Japonica	NC_029266.1	15394721	15400336	5615	Nonautonomous:Gypsy	Reina	yes	GAG|Reina PROT|Reina RT|Reina RH|Reina INT|Reina CHD|Reina
NC_029266.1-15919225-15925663-Oryza_sativa_Japonica	NC_029266.1	15919225	15925663	6438	Nonautonomous:Copia	TAR	yes	GAG|TAR PROT|TAR INT|TAR RT|TAR RH|TAR
NC_029266.1-16545375-16551016-Oryza_sativa_Japonica	NC_029266.1	16545375	16551016	5641	Nonautonomous:Copia	TAR	yes	GAG|TAR PROT|TAR INT|TAR RT|TAR RH|TAR
NC_029266.1-18709490-18715931-Oryza_sativa_Japonica	NC_029266.1	18709490	18715931	6441	Nonautonomous:Copia	TAR	yes	GAG|TAR PROT|TAR INT|TAR RT|TAR RH|TAR
NC_029266.1-18795738-18802176-Oryza_sativa_Japonica	NC_029266.1	18795738	18802176	6438	Nonautonomous:Copia	TAR	yes	GAG|TAR PROT|TAR INT|TAR RT|TAR RH|TAR
NC_029266.1-25448895-25460905-Oryza_sativa_Japonica	NC_029266.1	25448895	25460905	12010	Nonautonomous:Gypsy	Tekay	yes	GAG|Tekay PROT|Tekay RT|Tekay RH|Tekay INT|Tekay CHD|Tekay
NC_029266.1-27355749-27361411-Oryza_sativa_Japonica	NC_029266.1	27355749	27361411	5662	Nonautonomous:Gypsy	Reina	yes	GAG|Reina PROT|Reina RT|Reina RH|Reina INT|Reina CHD|Reina
NC_029266.1-7840411-7849379-Oryza_sativa_Japonica	NC_029266.1	7840411	7849379	8968	Nonautonomous:Gypsy	Ogre	yes	GAG|Ogre PROT|Ogre RT|Ogre RH|Ogre INT|Ogre
NC_029266.1-8181946-8187132-Oryza_sativa_Japonica	NC_029266.1	8181946	8187132	5186	Nonautonomous:Copia	TAR	yes	GAG|TAR PROT|TAR INT|TAR RT|TAR RH|TAR
NC_029266.1-8886227-8898240-Oryza_sativa_Japonica	NC_029266.1	8886227	8898240	12013	Nonautonomous:Gypsy	Tekay	yes	GAG|Tekay PROT|Tekay RT|Tekay RH|Tekay INT|Tekay CHD|Tekay
NC_029266.1-9580223-9586718-Oryza_sativa_Japonica	NC_029266.1	9580223	9586718	6495	Nonautonomous:Copia	TAR	yes	GAG|TAR PROT|TAR INT|TAR RT|TAR RH|TAR
NC_029267.1-10087186-10106319-Oryza_sativa_Japonica	NC_029267.1	10087186	10106319	19133	Nonautonomous:Gypsy	Ogre	yes	GAG|Ogre PROT|Ogre RT|Ogre RH|Ogre INT|Ogre
NC_029267.1-10746401-10752830-Oryza_sativa_Japonica	NC_029267.1	10746401	10752830	6429	Nonautonomous:Copia	TAR	yes	GAG|TAR PROT|TAR INT|TAR RT|TAR RH|TAR
NC_029267.1-11474382-11486368-Oryza_sativa_Japonica	NC_029267.1	11474382	11486368	11986	Nonautonomous:Gypsy	Tekay	yes	GAG|Tekay PROT|Tekay RT|Tekay RH|Tekay INT|Tekay CHD|Tekay
NC_029267.1-12284701-12293918-Oryza_sativa_Japonica	NC_029267.1	12284701	12293918	9217	Nonautonomous:Copia	TAR	yes	GAG|TAR PROT|TAR INT|TAR RT|TAR RH|TAR
NC_029267.1-12496315-12505017-Oryza_sativa_Japonica	NC_029267.1	12496315	12505017	8702	Nonautonomous:Gypsy	Ogre	yes	GAG|Ogre PROT|Ogre RT|Ogre RH|Ogre INT|Ogre
NC_029267.1-13031152-13048281-Oryza_sativa_Japonica	NC_029267.1	13031152	13048281	17129	Nonautonomous:Gypsy	Tekay	yes	GAG|Tekay PROT|Tekay RT|Tekay RH|Tekay INT|Tekay CHD|Tekay
NC_029267.1-13893109-13904984-Oryza_sativa_Japonica	NC_029267.1	13893109	13904984	11875	Nonautonomous:Gypsy	Tekay	yes	GAG|Tekay PROT|Tekay RT|Tekay RH|Tekay INT|Tekay CHD|Tekay
NC_029267.1-16350858-16357304-Oryza_sativa_Japonica	NC_029267.1	16350858	16357304	6446	Nonautonomous:Copia	TAR	yes	GAG|TAR PROT|TAR INT|TAR RT|TAR RH|TAR
NC_029267.1-16435210-16446411-Oryza_sativa_Japonica	NC_029267.1	16435210	16446411	11201	Nonautonomous:Gypsy	Tekay	yes	GAG|Tekay PROT|Tekay RT|Tekay RH|Tekay INT|Tekay CHD|Tekay
NC_029267.1-16665092-16676820-Oryza_sativa_Japonica	NC_029267.1	16665092	16676820	11728	Autonomous:Gypsy	Tekay	yes	GAG|Tekay PROT|Tekay RT|Tekay RH|Tekay INT|Tekay CHD|Tekay
NC_029267.1-18184423-18190865-Oryza_sativa_Japonica	NC_029267.1	18184423	18190865	6442	Nonautonomous:Copia	TAR	yes	GAG|TAR PROT|TAR INT|TAR RT|TAR RH|TAR
NC_029267.1-18808294-18820293-Oryza_sativa_Japonica	NC_029267.1	18808294	18820293	11999	Nonautonomous:Gypsy	Tekay	yes	GAG|Tekay PROT|Tekay RT|Tekay RH|Tekay INT|Tekay CHD|Tekay
NC_029267.1-19232974-19237693-Oryza_sativa_Japonica	NC_029267.1	19232974	19237693	4719	Nonautonomous:Copia	Tork	yes	GAG|Tork PROT|Tork INT|Tork RT|Tork RH|Tork
NC_029267.1-1955495-1961935-Oryza_sativa_Japonica	NC_029267.1	1955495	1961935	6440	Nonautonomous:Copia	TAR	yes	GAG|TAR PROT|TAR INT|TAR RT|TAR RH|TAR
NC_029267.1-20957962-20964351-Oryza_sativa_Japonica	NC_029267.1	20957962	20964351	6389	Nonautonomous:Copia	TAR	yes	GAG|TAR PROT|TAR INT|TAR RT|TAR RH|TAR
NC_029267.1-21026710-21038750-Oryza_sativa_Japonica	NC_029267.1	21026710	21038750	12040	Nonautonomous:Gypsy	Tekay	yes	GAG|Tekay PROT|Tekay RT|Tekay RH|Tekay INT|Tekay CHD|Tekay
NC_029267.1-21105486-21110208-Oryza_sativa_Japonica	NC_029267.1	21105486	21110208	4722	Nonautonomous:Copia	Tork	yes	GAG|Tork PROT|Tork INT|Tork RT|Tork RH|Tork
NC_029267.1-22206323-22212747-Oryza_sativa_Japonica	NC_029267.1	22206323	22212747	6424	Nonautonomous:Copia	TAR	yes	GAG|TAR PROT|TAR INT|TAR RT|TAR RH|TAR
NC_029267.1-24129676-24136102-Oryza_sativa_Japonica	NC_029267.1	24129676	24136102	6426	Nonautonomous:Copia	TAR	yes	GAG|TAR PROT|TAR INT|TAR RT|TAR RH|TAR
NC_029267.1-24577726-24584171-Oryza_sativa_Japonica	NC_029267.1	24577726	24584171	6445	Nonautonomous:Copia	TAR	yes	GAG|TAR PROT|TAR INT|TAR RT|TAR RH|TAR
NC_029267.1-25433593-25439982-Oryza_sativa_Japonica	NC_029267.1	25433593	25439982	6389	Nonautonomous:Copia	TAR	yes	GAG|TAR PROT|TAR INT|TAR RT|TAR RH|TAR
NC_029267.1-25597930-25604365-Oryza_sativa_Japonica	NC_029267.1	25597930	25604365	6435	Nonautonomous:Copia	TAR	yes	GAG|TAR PROT|TAR INT|TAR RT|TAR RH|TAR
NC_029267.1-26732672-26744822-Oryza_sativa_Japonica	NC_029267.1	26732672	26744822	12150	Nonautonomous:Gypsy	Tekay	yes	GAG|Tekay PROT|Tekay RT|Tekay RH|Tekay INT|Tekay CHD|Tekay
NC_029267.1-5340376-5360700-Oryza_sativa_Japonica	NC_029267.1	5340376	5360700	20324	Nonautonomous:Copia	TAR	yes	GAG|TAR PROT|TAR INT|TAR RT|TAR RH|TAR
NC_029267.1-6550416-6556597-Oryza_sativa_Japonica	NC_029267.1	6550416	6556597	6181	Nonautonomous:Copia	TAR	yes	GAG|TAR PROT|TAR INT|TAR RT|TAR RH|TAR
NC_029267.1-6681167-6687614-Oryza_sativa_Japonica	NC_029267.1	6681167	6687614	6447	Nonautonomous:Copia	TAR	yes	GAG|TAR PROT|TAR INT|TAR RT|TAR RH|TAR
NC_029256.1-14870331-14876816-Oryza_sativa_Japonica	NC_029256.1	14870331	14876816	6485	Nonautonomous:Copia	TAR	yes	GAG|TAR PROT|TAR INT|TAR RT|TAR RH|TAR
NC_029259.1-1191463-1197915-Oryza_sativa_Japonica	NC_029259.1	1191463	1197915	6452	Nonautonomous:Copia	TAR	yes	GAG|TAR PROT|TAR INT|TAR RT|TAR RH|TAR
NC_029261.1-15157640-15164027-Oryza_sativa_Japonica	NC_029261.1	15157640	15164027	6387	Nonautonomous:Copia	TAR	yes	GAG|TAR PROT|TAR INT|TAR RT|TAR RH|TAR
NC_029261.1-24545628-24552078-Oryza_sativa_Japonica	NC_029261.1	24545628	24552078	6450	Nonautonomous:Copia	TAR	yes	GAG|TAR PROT|TAR INT|TAR RT|TAR RH|TAR
NC_029261.1-28417182-28423626-Oryza_sativa_Japonica	NC_029261.1	28417182	28423626	6444	Nonautonomous:Copia	TAR	yes	GAG|TAR PROT|TAR INT|TAR RT|TAR RH|TAR
NC_029264.1-5575766-5584696-Oryza_sativa_Japonica	NC_029264.1	5575766	5584696	8930	Autonomous:Gypsy	Ogre	yes	GAG|Ogre PROT|Ogre RT|Ogre RH|Ogre INT|Ogre
NC_029265.1-15551054-15557485-Oryza_sativa_Japonica	NC_029265.1	15551054	15557485	6431	Nonautonomous:Copia	TAR	yes	GAG|TAR PROT|TAR INT|TAR RT|TAR RH|TAR
NC_029266.1-1054387-1060841-Oryza_sativa_Japonica	NC_029266.1	1054387	1060841	6454	Nonautonomous:Copia	TAR	yes	GAG|TAR PROT|TAR INT|TAR RT|TAR RH|TAR
NC_029266.1-14154073-14160521-Oryza_sativa_Japonica	NC_029266.1	14154073	14160521	6448	Nonautonomous:Copia	TAR	yes	GAG|TAR PROT|TAR INT|TAR RT|TAR RH|TAR
NC_029266.1-17455305-17461738-Oryza_sativa_Japonica	NC_029266.1	17455305	17461738	6433	Nonautonomous:Copia	TAR	yes	GAG|TAR PROT|TAR INT|TAR RT|TAR RH|TAR
NC_029266.1-20464834-20471277-Oryza_sativa_Japonica	NC_029266.1	20464834	20471277	6443	Nonautonomous:Copia	TAR	yes	GAG|TAR PROT|TAR INT|TAR RT|TAR RH|TAR
NC_029258.1-11701882-11708322-Oryza_sativa_Japonica	NC_029258.1	11701882	11708322	6440	Nonautonomous:Copia	TAR	yes	GAG|TAR PROT|TAR INT|TAR RT|TAR RH|TAR
NC_029262.1-4412148-4418602-Oryza_sativa_Japonica	NC_029262.1	4412148	4418602	6454	Nonautonomous:Copia	TAR	yes	GAG|TAR PROT|TAR INT|TAR RT|TAR RH|TAR
NC_029265.1-18621496-18627904-Oryza_sativa_Japonica	NC_029265.1	18621496	18627904	6408	Nonautonomous:Copia	TAR	yes	GAG|TAR PROT|TAR INT|TAR RT|TAR RH|TAR
NC_029267.1-1823249-1829688-Oryza_sativa_Japonica	NC_029267.1	1823249	1829688	6439	Nonautonomous:Copia	TAR	yes	GAG|TAR PROT|TAR INT|TAR RT|TAR RH|TAR
NC_029267.1-18240859-18253017-Oryza_sativa_Japonica	NC_029267.1	18240859	18253017	12158	Nonautonomous:Gypsy	Tekay	yes	GAG|Tekay PROT|Tekay RT|Tekay RH|Tekay INT|Tekay CHD|Tekay
NC_029263.1-15298157-15309387-Oryza_sativa_Japonica	NC_029263.1	15298157	15309387	11230	Autonomous:Gypsy	Ogre	yes	GAG|Ogre PROT|Ogre RT|Ogre RH|Ogre INT|Ogre
NC_029266.1-16343192-16352072-Oryza_sativa_Japonica	NC_029266.1	16343192	16352072	8880	Nonautonomous:Gypsy	Ogre	yes	GAG|Ogre PROT|Ogre RT|Ogre RH|Ogre INT|Ogre
NC_029256.1-13618448-13622568-Oryza_sativa_Japonica	NC_029256.1	13618448	13622568	4120	Nonautonomous:Unknown	none	none	none
NC_029256.1-20756397-20760493-Oryza_sativa_Japonica	NC_029256.1	20756397	20760493	4096	Nonautonomous:Unknown	none	none	none
NC_029256.1-36032794-36036684-Oryza_sativa_Japonica	NC_029256.1	36032794	36036684	3890	Nonautonomous:Unknown	none	none	none
NC_029257.1-11886205-11889893-Oryza_sativa_Japonica	NC_029257.1	11886205	11889893	3688	Nonautonomous:Unknown	none	none	none
NC_029257.1-19432906-19436495-Oryza_sativa_Japonica	NC_029257.1	19432906	19436495	3589	Nonautonomous:Unknown	none	none	none
NC_029257.1-24007795-24011752-Oryza_sativa_Japonica	NC_029257.1	24007795	24011752	3957	Nonautonomous:Unknown	none	none	none
NC_029257.1-30792930-30797444-Oryza_sativa_Japonica	NC_029257.1	30792930	30797444	4514	Nonautonomous:Unknown	none	none	none
NC_029257.1-33589841-33593524-Oryza_sativa_Japonica	NC_029257.1	33589841	33593524	3683	Nonautonomous:Unknown	none	none	none
NC_029257.1-9035017-9039055-Oryza_sativa_Japonica	NC_029257.1	9035017	9039055	4038	Nonautonomous:Unknown	none	none	none
NC_029258.1-30106473-30108904-Oryza_sativa_Japonica	NC_029258.1	30106473	30108904	2431	Nonautonomous:Unknown	none	none	none
NC_029258.1-5265810-5270040-Oryza_sativa_Japonica	NC_029258.1	5265810	5270040	4230	Nonautonomous:Unknown	none	none	none
NC_029259.1-10643995-10648044-Oryza_sativa_Japonica	NC_029259.1	10643995	10648044	4049	Nonautonomous:Unknown	none	none	none
NC_029259.1-11133345-11136005-Oryza_sativa_Japonica	NC_029259.1	11133345	11136005	2660	Nonautonomous:Unknown	none	none	none
NC_029259.1-20033513-20037617-Oryza_sativa_Japonica	NC_029259.1	20033513	20037617	4104	Nonautonomous:Unknown	none	none	none
NC_029259.1-24150267-24154178-Oryza_sativa_Japonica	NC_029259.1	24150267	24154178	3911	Nonautonomous:Unknown	none	none	none
NC_029260.1-19454468-19458388-Oryza_sativa_Japonica	NC_029260.1	19454468	19458388	3920	Nonautonomous:Unknown	none	none	none
NC_029261.1-26887156-26891128-Oryza_sativa_Japonica	NC_029261.1	26887156	26891128	3972	Nonautonomous:Unknown	none	none	none
NC_029261.1-5134862-5139185-Oryza_sativa_Japonica	NC_029261.1	5134862	5139185	4323	Nonautonomous:Unknown	none	none	none
NC_029262.1-19726398-19731048-Oryza_sativa_Japonica	NC_029262.1	19726398	19731048	4650	Nonautonomous:Unknown	none	none	none
NC_029262.1-2355483-2359518-Oryza_sativa_Japonica	NC_029262.1	2355483	2359518	4035	Nonautonomous:Unknown	none	none	none
NC_029262.1-490827-494940-Oryza_sativa_Japonica	NC_029262.1	490827	494940	4113	Nonautonomous:Unknown	none	none	none
NC_029262.1-5511262-5516082-Oryza_sativa_Japonica	NC_029262.1	5511262	5516082	4820	Nonautonomous:Unknown	none	none	none
NC_029262.1-7296298-7300408-Oryza_sativa_Japonica	NC_029262.1	7296298	7300408	4110	Nonautonomous:Unknown	none	none	none
NC_029263.1-20370106-20374839-Oryza_sativa_Japonica	NC_029263.1	20370106	20374839	4733	Nonautonomous:Unknown	none	none	none
NC_029263.1-23513266-23517148-Oryza_sativa_Japonica	NC_029263.1	23513266	23517148	3882	Nonautonomous:Unknown	none	none	none
NC_029264.1-7174276-7178002-Oryza_sativa_Japonica	NC_029264.1	7174276	7178002	3726	Nonautonomous:Unknown	none	none	none
NC_029265.1-2497130-2501068-Oryza_sativa_Japonica	NC_029265.1	2497130	2501068	3938	Nonautonomous:Unknown	none	none	none
NC_029265.1-826842-831332-Oryza_sativa_Japonica	NC_029265.1	826842	831332	4490	Nonautonomous:Unknown	none	none	none
NC_029266.1-14766831-14771111-Oryza_sativa_Japonica	NC_029266.1	14766831	14771111	4280	Nonautonomous:Unknown	none	none	none
NC_029266.1-17306413-17310422-Oryza_sativa_Japonica	NC_029266.1	17306413	17310422	4009	Nonautonomous:Unknown	none	none	none
NC_029266.1-21385131-21389278-Oryza_sativa_Japonica	NC_029266.1	21385131	21389278	4147	Nonautonomous:Unknown	none	none	none
NC_029267.1-4326120-4330683-Oryza_sativa_Japonica	NC_029267.1	4326120	4330683	4563	Nonautonomous:Unknown	none	none	none
NC_029267.1-4790760-4795140-Oryza_sativa_Japonica	NC_029267.1	4790760	4795140	4380	Nonautonomous:Unknown	none	none	none
NC_029256.1-11947969-11951795-Oryza_sativa_Japonica	NC_029256.1	11947969	11951795	3826	Nonautonomous:Copia	Tork	no	GAG|Tork PROT|Tork
NC_029256.1-16307562-16311968-Oryza_sativa_Japonica	NC_029256.1	16307562	16311968	4406	Nonautonomous:Gypsy	CRM	no	GAG|CRM
NC_029256.1-16974765-16979178-Oryza_sativa_Japonica	NC_029256.1	16974765	16979178	4413	Nonautonomous:Gypsy	CRM	no	GAG|CRM
NC_029256.1-20470513-20475001-Oryza_sativa_Japonica	NC_029256.1	20470513	20475001	4488	Nonautonomous:Gypsy	CRM	no	GAG|CRM
NC_029256.1-20917841-20922828-Oryza_sativa_Japonica	NC_029256.1	20917841	20922828	4987	Nonautonomous:Gypsy	CRM	no	GAG|CRM PROT|CRM CHDCR|CRM
NC_029256.1-2535673-2539068-Oryza_sativa_Japonica	NC_029256.1	2535673	2539068	3395	Nonautonomous:Copia	Ale	no	INT|Ale RT|Ale RH|Ale
NC_029256.1-27528951-27532837-Oryza_sativa_Japonica	NC_029256.1	27528951	27532837	3886	Nonautonomous:Copia	Tork	no	GAG|Tork PROT|Tork
NC_029256.1-32517692-32522081-Oryza_sativa_Japonica	NC_029256.1	32517692	32522081	4389	Nonautonomous:Gypsy	CRM	no	GAG|CRM
NC_029256.1-38172649-38174670-Oryza_sativa_Japonica	NC_029256.1	38172649	38174670	2021	Nonautonomous:Copia	Ivana	no	GAG|Ivana
NC_029256.1-41752707-41757635-Oryza_sativa_Japonica	NC_029256.1	41752707	41757635	4928	Nonautonomous:Gypsy	CRM	no	GAG|CRM PROT|CRM CHDCR|CRM
NC_029256.1-9956616-9961029-Oryza_sativa_Japonica	NC_029256.1	9956616	9961029	4413	Nonautonomous:Gypsy	CRM	no	GAG|CRM
NC_029257.1-10289544-10297435-Oryza_sativa_Japonica	NC_029257.1	10289544	10297435	7891	Nonautonomous:Gypsy	Athila	no	GAG|Athila PROT|Athila
NC_029257.1-10576981-10593029-Oryza_sativa_Japonica	NC_029257.1	10576981	10593029	16048	Nonautonomous:Gypsy	CRM	no	GAG|CRM
NC_029257.1-10581472-10585840-Oryza_sativa_Japonica	NC_029257.1	10581472	10585840	4368	Nonautonomous:Gypsy	CRM	no	GAG|CRM
NC_029257.1-15240218-15244933-Oryza_sativa_Japonica	NC_029257.1	15240218	15244933	4715	Nonautonomous:Gypsy	CRM	no	PROT|CRM CHDCR|CRM
NC_029257.1-18885047-18889477-Oryza_sativa_Japonica	NC_029257.1	18885047	18889477	4430	Nonautonomous:Gypsy	CRM	no	GAG|CRM
NC_029257.1-18896935-18902339-Oryza_sativa_Japonica	NC_029257.1	18896935	18902339	5404	Nonautonomous:Gypsy	Reina	no	GAG|Reina PROT|Reina RH|Reina INT|Reina CHD|Reina
NC_029257.1-20090995-20098363-Oryza_sativa_Japonica	NC_029257.1	20090995	20098363	7368	Nonautonomous:Copia	Bianca	no	INT|Bianca
NC_029257.1-23967794-23972156-Oryza_sativa_Japonica	NC_029257.1	23967794	23972156	4362	Nonautonomous:Gypsy	CRM	no	GAG|CRM CHDCR|CRM
NC_029257.1-9263241-9267653-Oryza_sativa_Japonica	NC_029257.1	9263241	9267653	4412	Nonautonomous:Gypsy	CRM	no	GAG|CRM
NC_029258.1-11603948-11608396-Oryza_sativa_Japonica	NC_029258.1	11603948	11608396	4448	Nonautonomous:Copia	Ale	no	GAG|Ale INT|Ale RT|Ale RH|Ale
NC_029258.1-17133974-17138473-Oryza_sativa_Japonica	NC_029258.1	17133974	17138473	4499	Nonautonomous:Gypsy	CRM	no	GAG|CRM
NC_029258.1-18513289-18520673-Oryza_sativa_Japonica	NC_029258.1	18513289	18520673	7384	Nonautonomous:Gypsy	Tekay	no	GAG|Tekay
NC_029258.1-21563153-21571736-Oryza_sativa_Japonica	NC_029258.1	21563153	21571736	8583	Nonautonomous:Gypsy	mixture	no	GAG|CRM RH|Ogre
NC_029258.1-22052234-22063745-Oryza_sativa_Japonica	NC_029258.1	22052234	22063745	11511	Nonautonomous:Copia	Bianca	no	INT|Bianca
NC_029258.1-22174914-22179271-Oryza_sativa_Japonica	NC_029258.1	22174914	22179271	4357	Nonautonomous:Gypsy	CRM	no	GAG|CRM
NC_029258.1-22427903-22432644-Oryza_sativa_Japonica	NC_029258.1	22427903	22432644	4741	Nonautonomous:Gypsy	CRM	no	PROT|CRM CHDCR|CRM
NC_029258.1-22694004-22697294-Oryza_sativa_Japonica	NC_029258.1	22694004	22697294	3290	Nonautonomous:Gypsy	CRM	no	CHDCR|CRM
NC_029258.1-26898609-26902971-Oryza_sativa_Japonica	NC_029258.1	26898609	26902971	4362	Nonautonomous:Gypsy	CRM	no	GAG|CRM
NC_029258.1-31908576-31912977-Oryza_sativa_Japonica	NC_029258.1	31908576	31912977	4401	Nonautonomous:Gypsy	CRM	no	GAG|CRM
NC_029258.1-4144672-4148610-Oryza_sativa_Japonica	NC_029258.1	4144672	4148610	3938	Nonautonomous:Copia	Tork	no	GAG|Tork PROT|Tork
NC_029259.1-10297138-10301512-Oryza_sativa_Japonica	NC_029259.1	10297138	10301512	4374	Nonautonomous:Gypsy	CRM	no	GAG|CRM
NC_029259.1-10693292-10697625-Oryza_sativa_Japonica	NC_029259.1	10693292	10697625	4333	Nonautonomous:Gypsy	CRM	no	GAG|CRM
NC_029259.1-20718046-20723272-Oryza_sativa_Japonica	NC_029259.1	20718046	20723272	5226	Nonautonomous:Gypsy	Reina	no	GAG|Reina PROT|Reina RT|Reina RH|Reina CHD|Reina
NC_029259.1-26272314-26276563-Oryza_sativa_Japonica	NC_029259.1	26272314	26276563	4249	Nonautonomous:Gypsy	CRM	no	GAG|CRM
NC_029259.1-2652535-2661314-Oryza_sativa_Japonica	NC_029259.1	2652535	2661314	8779	Nonautonomous:TR-GAG	Tekay	no	GAG|Tekay
NC_029259.1-29926407-29938622-Oryza_sativa_Japonica	NC_029259.1	29926407	29938622	12215	Nonautonomous:Gypsy	Ogre	no	GAG|Ogre PROT|Ogre RH|Ogre INT|Ogre
NC_029259.1-3772496-3782865-Oryza_sativa_Japonica	NC_029259.1	3772496	3782865	10369	Nonautonomous:Gypsy	Athila	no	GAG|Athila
NC_029259.1-7111300-7115717-Oryza_sativa_Japonica	NC_029259.1	7111300	7115717	4417	Nonautonomous:Gypsy	CRM	no	GAG|CRM
NC_029259.1-7790603-7798096-Oryza_sativa_Japonica	NC_029259.1	7790603	7798096	7493	Nonautonomous:Gypsy	Tekay	no	GAG|Tekay
NC_029259.1-8950986-8955404-Oryza_sativa_Japonica	NC_029259.1	8950986	8955404	4418	Nonautonomous:Gypsy	CRM	no	GAG|CRM
NC_029259.1-9582591-9586879-Oryza_sativa_Japonica	NC_029259.1	9582591	9586879	4288	Nonautonomous:Gypsy	CRM	no	GAG|CRM
NC_029259.1-9641964-9646366-Oryza_sativa_Japonica	NC_029259.1	9641964	9646366	4402	Nonautonomous:Gypsy	CRM	no	GAG|CRM
NC_029259.1-9750309-9754722-Oryza_sativa_Japonica	NC_029259.1	9750309	9754722	4413	Nonautonomous:Gypsy	CRM	no	GAG|CRM
NC_029259.1-9766857-9771157-Oryza_sativa_Japonica	NC_029259.1	9766857	9771157	4300	Nonautonomous:Gypsy	CRM	no	GAG|CRM
NC_029259.1-9850472-9854849-Oryza_sativa_Japonica	NC_029259.1	9850472	9854849	4377	Nonautonomous:Gypsy	CRM	no	GAG|CRM
NC_029259.1-9964526-9968980-Oryza_sativa_Japonica	NC_029259.1	9964526	9968980	4454	Nonautonomous:Gypsy	CRM	no	GAG|CRM
NC_029260.1-10287652-10293371-Oryza_sativa_Japonica	NC_029260.1	10287652	10293371	5719	Nonautonomous:Gypsy	Tekay	no	GAG|Tekay
NC_029260.1-12061021-12065445-Oryza_sativa_Japonica	NC_029260.1	12061021	12065445	4424	Nonautonomous:Gypsy	CRM	no	GAG|CRM
NC_029260.1-12262539-12271658-Oryza_sativa_Japonica	NC_029260.1	12262539	12271658	9119	Nonautonomous:Gypsy	Athila	no	GAG|Athila RT|Athila RH|Athila INT|Athila
NC_029260.1-12333642-12337965-Oryza_sativa_Japonica	NC_029260.1	12333642	12337965	4323	Nonautonomous:Gypsy	CRM	no	GAG|CRM
NC_029260.1-12415948-12420378-Oryza_sativa_Japonica	NC_029260.1	12415948	12420378	4430	Nonautonomous:Gypsy	CRM	no	GAG|CRM
NC_029260.1-12698728-12703146-Oryza_sativa_Japonica	NC_029260.1	12698728	12703146	4418	Nonautonomous:Gypsy	CRM	no	GAG|CRM
NC_029260.1-12737063-12741478-Oryza_sativa_Japonica	NC_029260.1	12737063	12741478	4415	Nonautonomous:Gypsy	CRM	no	GAG|CRM
NC_029260.1-13444647-13456028-Oryza_sativa_Japonica	NC_029260.1	13444647	13456028	11381	Nonautonomous:Gypsy	Retand	no	GAG|Retand PROT|Retand RH|Retand INT|Retand
NC_029260.1-14969901-14978495-Oryza_sativa_Japonica	NC_029260.1	14969901	14978495	8594	Nonautonomous:Gypsy	Tekay	no	GAG|Tekay
NC_029260.1-18255885-18260566-Oryza_sativa_Japonica	NC_029260.1	18255885	18260566	4681	Nonautonomous:Gypsy	CRM	no	GAG|CRM
NC_029260.1-18823274-18828597-Oryza_sativa_Japonica	NC_029260.1	18823274	18828597	5323	Nonautonomous:Copia	TAR	no	GAG|TAR PROT|TAR INT|TAR RT|TAR
NC_029260.1-18855083-18859496-Oryza_sativa_Japonica	NC_029260.1	18855083	18859496	4413	Nonautonomous:Gypsy	CRM	no	GAG|CRM
NC_029260.1-19572049-19576329-Oryza_sativa_Japonica	NC_029260.1	19572049	19576329	4280	Nonautonomous:Gypsy	Retand	no	GAG|Retand
NC_029260.1-21334909-21339263-Oryza_sativa_Japonica	NC_029260.1	21334909	21339263	4354	Nonautonomous:Gypsy	CRM	no	GAG|CRM
NC_029260.1-24221641-24226107-Oryza_sativa_Japonica	NC_029260.1	24221641	24226107	4466	Nonautonomous:Gypsy	CRM	no	GAG|CRM
NC_029260.1-3392196-3398961-Oryza_sativa_Japonica	NC_029260.1	3392196	3398961	6765	Nonautonomous:Gypsy	Ogre	no	GAG|Ogre INT|Ogre
NC_029260.1-4737244-4743250-Oryza_sativa_Japonica	NC_029260.1	4737244	4743250	6006	Nonautonomous:Gypsy	CRM	no	GAG|CRM
NC_029260.1-7426834-7431256-Oryza_sativa_Japonica	NC_029260.1	7426834	7431256	4422	Nonautonomous:Gypsy	CRM	no	GAG|CRM
NC_029260.1-8851342-8859564-Oryza_sativa_Japonica	NC_029260.1	8851342	8859564	8222	Nonautonomous:Gypsy	CRM	no	GAG|CRM
NC_029260.1-9941172-9947243-Oryza_sativa_Japonica	NC_029260.1	9941172	9947243	6071	Nonautonomous:Gypsy	Tekay	no	GAG|Tekay
NC_029261.1-10892623-10896954-Oryza_sativa_Japonica	NC_029261.1	10892623	10896954	4331	Nonautonomous:Gypsy	CRM	no	GAG|CRM
NC_029261.1-14095311-14102699-Oryza_sativa_Japonica	NC_029261.1	14095311	14102699	7388	Nonautonomous:Gypsy	Ogre	no	GAG|Ogre INT|Ogre
NC_029261.1-15455232-15459653-Oryza_sativa_Japonica	NC_029261.1	15455232	15459653	4421	Nonautonomous:Gypsy	CRM	no	GAG|CRM
NC_029261.1-15901345-15905759-Oryza_sativa_Japonica	NC_029261.1	15901345	15905759	4414	Nonautonomous:Gypsy	CRM	no	GAG|CRM
NC_029261.1-16160236-16164594-Oryza_sativa_Japonica	NC_029261.1	16160236	16164594	4358	Nonautonomous:Gypsy	CRM	no	GAG|CRM
NC_029261.1-16901538-16909221-Oryza_sativa_Japonica	NC_029261.1	16901538	16909221	7683	Nonautonomous:Gypsy	Athila	no	GAG|Athila
NC_029261.1-18129325-18134338-Oryza_sativa_Japonica	NC_029261.1	18129325	18134338	5013	Nonautonomous:Gypsy	CRM	no	GAG|CRM PROT|CRM CHDCR|CRM
NC_029261.1-23313512-23317435-Oryza_sativa_Japonica	NC_029261.1	23313512	23317435	3923	Nonautonomous:Copia	Tork	no	GAG|Tork PROT|Tork
NC_029261.1-557180-564394-Oryza_sativa_Japonica	NC_029261.1	557180	564394	7214	Nonautonomous:Copia	Bianca	no	INT|Bianca
NC_029261.1-5965444-5970055-Oryza_sativa_Japonica	NC_029261.1	5965444	5970055	4611	Nonautonomous:Gypsy	CRM	no	GAG|CRM
NC_029261.1-751077-765905-Oryza_sativa_Japonica	NC_029261.1	751077	765905	14828	Nonautonomous:Gypsy	Ogre	no	GAG|Ogre PROT|Ogre RT|Ogre RH|Ogre
NC_029261.1-9455214-9459644-Oryza_sativa_Japonica	NC_029261.1	9455214	9459644	4430	Nonautonomous:Gypsy	CRM	no	GAG|CRM
NC_029262.1-10827051-10831812-Oryza_sativa_Japonica	NC_029262.1	10827051	10831812	4761	Nonautonomous:Gypsy	CRM	no	PROT|CRM
NC_029262.1-11987761-11992185-Oryza_sativa_Japonica	NC_029262.1	11987761	11992185	4424	Nonautonomous:Gypsy	CRM	no	GAG|CRM
NC_029262.1-12097508-12101879-Oryza_sativa_Japonica	NC_029262.1	12097508	12101879	4371	Nonautonomous:Gypsy	CRM	no	GAG|CRM
NC_029262.1-12297573-12312481-Oryza_sativa_Japonica	NC_029262.1	12297573	12312481	14908	Nonautonomous:Gypsy	Retand	no	PROT|Retand RT|Retand CHDCR|CRM GAG|CRM
NC_029262.1-12385142-12389521-Oryza_sativa_Japonica	NC_029262.1	12385142	12389521	4379	Nonautonomous:Gypsy	CRM	no	GAG|CRM CHDCR|CRM
NC_029262.1-13645399-13649784-Oryza_sativa_Japonica	NC_029262.1	13645399	13649784	4385	Nonautonomous:Gypsy	CRM	no	GAG|CRM
NC_029262.1-14441536-14448829-Oryza_sativa_Japonica	NC_029262.1	14441536	14448829	7293	Nonautonomous:Gypsy	Ogre	no	GAG|Ogre INT|Ogre
NC_029262.1-15760087-15767490-Oryza_sativa_Japonica	NC_029262.1	15760087	15767490	7403	Nonautonomous:Gypsy	Ogre	no	GAG|Ogre INT|Ogre
NC_029262.1-16562807-16566159-Oryza_sativa_Japonica	NC_029262.1	16562807	16566159	3352	Nonautonomous:Gypsy	CRM	no	PROT|CRM
NC_029262.1-17319592-17324026-Oryza_sativa_Japonica	NC_029262.1	17319592	17324026	4434	Nonautonomous:Gypsy	CRM	no	GAG|CRM
NC_029262.1-18813955-18818146-Oryza_sativa_Japonica	NC_029262.1	18813955	18818146	4191	Nonautonomous:Copia	Ale	no	PROT|Ale INT|Ale RT|Ale RH|Ale
NC_029262.1-7453455-7462106-Oryza_sativa_Japonica	NC_029262.1	7453455	7462106	8651	Nonautonomous:Gypsy	Tekay	no	GAG|Tekay
NC_029263.1-12070748-12075141-Oryza_sativa_Japonica	NC_029263.1	12070748	12075141	4393	Nonautonomous:Gypsy	CRM	no	GAG|CRM
NC_029263.1-12652720-12657164-Oryza_sativa_Japonica	NC_029263.1	12652720	12657164	4444	Nonautonomous:Gypsy	CRM	no	GAG|CRM
NC_029263.1-13247949-13252359-Oryza_sativa_Japonica	NC_029263.1	13247949	13252359	4410	Nonautonomous:Gypsy	CRM	no	GAG|CRM
NC_029263.1-16005368-16012637-Oryza_sativa_Japonica	NC_029263.1	16005368	16012637	7269	Nonautonomous:Gypsy	Ogre	no	GAG|Ogre INT|Ogre
NC_029263.1-17563989-17568437-Oryza_sativa_Japonica	NC_029263.1	17563989	17568437	4448	Nonautonomous:Gypsy	CRM	no	GAG|CRM CHDCR|CRM
NC_029263.1-18468821-18473275-Oryza_sativa_Japonica	NC_029263.1	18468821	18473275	4454	Nonautonomous:Gypsy	CRM	no	GAG|CRM
NC_029263.1-19942675-19947077-Oryza_sativa_Japonica	NC_029263.1	19942675	19947077	4402	Nonautonomous:Gypsy	CRM	no	GAG|CRM
NC_029263.1-6432403-6435131-Oryza_sativa_Japonica	NC_029263.1	6432403	6435131	2728	Nonautonomous:Gypsy	Reina	no	RH|Reina INT|Reina CHD|Reina
NC_029263.1-6954049-6961234-Oryza_sativa_Japonica	NC_029263.1	6954049	6961234	7185	Nonautonomous:Gypsy	Tekay	no	GAG|Tekay
NC_029263.1-8863438-8872617-Oryza_sativa_Japonica	NC_029263.1	8863438	8872617	9179	Nonautonomous:Gypsy	Athila	no	GAG|Athila PROT|Athila
NC_029263.1-9357491-9375011-Oryza_sativa_Japonica	NC_029263.1	9357491	9375011	17520	Nonautonomous:Gypsy	Retand	no	GAG|Retand RT|Retand RH|Retand INT|Retand
NC_029264.1-13252476-13259270-Oryza_sativa_Japonica	NC_029264.1	13252476	13259270	6794	Nonautonomous:Copia	Bianca	no	GAG|Bianca INT|Bianca RT|Bianca RH|Bianca
NC_029264.1-1959616-1963964-Oryza_sativa_Japonica	NC_029264.1	1959616	1963964	4348	Nonautonomous:Gypsy	CRM	no	GAG|CRM
NC_029264.1-21822604-21824722-Oryza_sativa_Japonica	NC_029264.1	21822604	21824722	2118	Nonautonomous:Copia	Ivana	no	GAG|Ivana
NC_029264.1-2433525-2450144-Oryza_sativa_Japonica	NC_029264.1	2433525	2450144	16619	Nonautonomous:Gypsy	CRM	no	GAG|CRM
NC_029264.1-2440437-2444850-Oryza_sativa_Japonica	NC_029264.1	2440437	2444850	4413	Nonautonomous:Gypsy	CRM	no	GAG|CRM
NC_029264.1-2957942-2967784-Oryza_sativa_Japonica	NC_029264.1	2957942	2967784	9842	Nonautonomous:Gypsy	CRM	no	GAG|CRM
NC_029264.1-3008113-3012667-Oryza_sativa_Japonica	NC_029264.1	3008113	3012667	4554	Nonautonomous:Gypsy	CRM	no	GAG|CRM
NC_029264.1-3032736-3041820-Oryza_sativa_Japonica	NC_029264.1	3032736	3041820	9084	Nonautonomous:Gypsy	Athila	no	GAG|Athila PROT|Athila
NC_029264.1-7263718-7270993-Oryza_sativa_Japonica	NC_029264.1	7263718	7270993	7275	Nonautonomous:Gypsy	Ogre	no	GAG|Ogre INT|Ogre
NC_029264.1-9811352-9818435-Oryza_sativa_Japonica	NC_029264.1	9811352	9818435	7083	Nonautonomous:Gypsy	Ogre	no	GAG|Ogre INT|Ogre
NC_029265.1-13462195-13464280-Oryza_sativa_Japonica	NC_029265.1	13462195	13464280	2085	Nonautonomous:Copia	Ivana	no	GAG|Ivana
NC_029265.1-15415369-15419582-Oryza_sativa_Japonica	NC_029265.1	15415369	15419582	4213	Nonautonomous:Copia	Ale	no	PROT|Ale INT|Ale RT|Ale RH|Ale
NC_029265.1-18093854-18098336-Oryza_sativa_Japonica	NC_029265.1	18093854	18098336	4482	Nonautonomous:Gypsy	Retand	no	GAG|Retand
NC_029265.1-1813448-1817220-Oryza_sativa_Japonica	NC_029265.1	1813448	1817220	3772	Nonautonomous:TR-GAG	Retand	no	GAG|Retand
NC_029265.1-555913-560358-Oryza_sativa_Japonica	NC_029265.1	555913	560358	4445	Nonautonomous:Gypsy	CRM	no	GAG|CRM
NC_029266.1-10634093-10638640-Oryza_sativa_Japonica	NC_029266.1	10634093	10638640	4547	Nonautonomous:Copia	Bianca	no	RH|Bianca
NC_029266.1-12068941-12073357-Oryza_sativa_Japonica	NC_029266.1	12068941	12073357	4416	Nonautonomous:Gypsy	CRM	no	GAG|CRM
NC_029266.1-12791088-12795516-Oryza_sativa_Japonica	NC_029266.1	12791088	12795516	4428	Nonautonomous:Gypsy	CRM	no	GAG|CRM
NC_029266.1-13047408-13051718-Oryza_sativa_Japonica	NC_029266.1	13047408	13051718	4310	Nonautonomous:Gypsy	CRM	no	GAG|CRM
NC_029266.1-13075100-13079462-Oryza_sativa_Japonica	NC_029266.1	13075100	13079462	4362	Nonautonomous:Gypsy	CRM	no	GAG|CRM
NC_029266.1-13354284-13358708-Oryza_sativa_Japonica	NC_029266.1	13354284	13358708	4424	Nonautonomous:Gypsy	CRM	no	GAG|CRM
NC_029266.1-15592204-15596594-Oryza_sativa_Japonica	NC_029266.1	15592204	15596594	4390	Nonautonomous:Gypsy	CRM	no	GAG|CRM
NC_029266.1-1960920-1965381-Oryza_sativa_Japonica	NC_029266.1	1960920	1965381	4461	Nonautonomous:Gypsy	CRM	no	GAG|CRM
NC_029266.1-1972968-1982558-Oryza_sativa_Japonica	NC_029266.1	1972968	1982558	9590	Nonautonomous:Copia	TAR	no	PROT|TAR GAG|TAR INT|TAR RT|TAR RH|TAR
NC_029266.1-23448521-23454660-Oryza_sativa_Japonica	NC_029266.1	23448521	23454660	6139	Nonautonomous:Copia	Bianca	no	RH|Bianca
NC_029266.1-7178945-7183369-Oryza_sativa_Japonica	NC_029266.1	7178945	7183369	4424	Nonautonomous:Gypsy	CRM	no	GAG|CRM
NC_029266.1-8533267-8542419-Oryza_sativa_Japonica	NC_029266.1	8533267	8542419	9152	Nonautonomous:Gypsy	Athila	no	GAG|Athila PROT|Athila
NC_029267.1-10987138-10994635-Oryza_sativa_Japonica	NC_029267.1	10987138	10994635	7497	Nonautonomous:Gypsy	Ogre	no	GAG|Ogre INT|Ogre
NC_029267.1-11468350-11492039-Oryza_sativa_Japonica	NC_029267.1	11468350	11492039	23689	Nonautonomous:Gypsy	Tekay	no	PROT|Tekay GAG|Tekay RT|Tekay RH|Tekay INT|Tekay CHD|Tekay
NC_029267.1-5317615-5328485-Oryza_sativa_Japonica	NC_029267.1	5317615	5328485	10870	Nonautonomous:Gypsy	Tekay	no	PROT|Tekay RT|Tekay RH|Tekay INT|Tekay CHD|Tekay
NC_029267.1-590075-595002-Oryza_sativa_Japonica	NC_029267.1	590075	595002	4927	Nonautonomous:Gypsy	CRM	no	GAG|CRM PROT|CRM CHDCR|CRM
NC_029267.1-6281972-6290639-Oryza_sativa_Japonica	NC_029267.1	6281972	6290639	8667	Nonautonomous:Gypsy	Tekay	no	GAG|Tekay
NC_029267.1-6955799-6959739-Oryza_sativa_Japonica	NC_029267.1	6955799	6959739	3940	Nonautonomous:Copia	Tork	no	GAG|Tork PROT|Tork
NC_029256.1-939748-953850-Oryza_sativa_Japonica	NC_029256.1	939748	953850	14102	Nonautonomous:Gypsy	Ogre	no	GAG|Ogre PROT|Ogre INT|Ogre RT|Reina RH|Reina CHD|Reina
NC_029257.1-20846337-20848557-Oryza_sativa_Japonica	NC_029257.1	20846337	20848557	2220	Nonautonomous:Copia	Ale	no	GAG|Ale
NC_029261.1-15175768-15180184-Oryza_sativa_Japonica	NC_029261.1	15175768	15180184	4416	Nonautonomous:Gypsy	CRM	no	GAG|CRM
NC_029264.1-3086275-3090697-Oryza_sativa_Japonica	NC_029264.1	3086275	3090697	4422	Nonautonomous:Gypsy	CRM	no	GAG|CRM
NC_029264.1-8819995-8824415-Oryza_sativa_Japonica	NC_029264.1	8819995	8824415	4420	Nonautonomous:Gypsy	CRM	no	GAG|CRM
NC_029266.1-4536475-4543781-Oryza_sativa_Japonica	NC_029266.1	4536475	4543781	7306	Nonautonomous:Gypsy	Ogre	no	GAG|Ogre INT|Ogre
NC_029267.1-4234129-4241449-Oryza_sativa_Japonica	NC_029267.1	4234129	4241449	7320	Nonautonomous:Copia	Bianca	no	INT|Bianca
NC_029267.1-8872008-8874029-Oryza_sativa_Japonica	NC_029267.1	8872008	8874029	2021	Nonautonomous:Copia	Ivana	no	GAG|Ivana
NC_029262.1-11922111-11926524-Oryza_sativa_Japonica	NC_029262.1	11922111	11926524	4413	Nonautonomous:Gypsy	CRM	no	GAG|CRM
NC_029262.1-12556148-12563361-Oryza_sativa_Japonica	NC_029262.1	12556148	12563361	7213	Nonautonomous:Gypsy	Ogre	no	GAG|Ogre INT|Ogre
